# Supplementary material
Source: publisher figshare collection journal article supplement (https://acs.figshare.com/ndownloader/files/38313117)

## Supporting Information

### Direct Reaction of Nitroarenes and Thiols via Photo-Driven Oxygen Atom-Transfer for Access to Sulfonamides

Zhaowei Bao<sup>1‡</sup>, Juan Zou<sup>2‡</sup>, Chengli Mou<sup>2</sup>, Zhichao Jin<sup>1</sup>, Shi-Chao Ren<sup>1,3\*</sup>, Yonggui

Robin Chi,<sup>1,3,\*</sup>

<sup>1</sup>State Key Laboratory Breeding Base of Green Pesticide and Agricultural Bioengineering, Key Laboratory of Green Pesticide and Agricultural Bioengineering, Ministry of Education, Guizhou University, Huaxi District, Guiyang 550025, China.

<sup>2</sup>Guizhou University of Traditional Chinese Medicine, Guiyang 550025, China

<sup>3</sup>Division of Chemistry & Biological Chemistry, School of Physical & Mathematical Sciences, Nanyang Technological University, Singapore 637371, Singapore.

<sup>‡</sup>These authors contributed equally to this work.

\*E-mail: [SHICHAO.REN@ntu.edu.sg](mailto:SHICHAO.REN@ntu.edu.sg); [robinchi@ntu.edu.sg](mailto:robinchi@ntu.edu.sg)

## Table of Contents

|                                                                                                       |    |
|-------------------------------------------------------------------------------------------------------|----|
| 1. General information .....                                                                          | 3  |
| 2. General procedure for nitroarenes synthesis.....                                                   | 4  |
| 3. General procedure for sulfonamides synthesis .....                                                 | 5  |
| 4. Condition optimizations.....                                                                       | 8  |
| 5. Structure determination <i>via</i> X-ray crystallographic analysis.....                            | 10 |
| 6. Mechanistic studies.....                                                                           | 15 |
| 7. Large scale reaction for <b>3a</b> synthesis .....                                                 | 17 |
| 8. Estimation of the excited potential of <b>1a</b> .....                                             | 19 |
| 8.1 UV-Vis absorption experiments.....                                                                | 19 |
| 8.2 Cyclic Voltammetry Studies .....                                                                  | 19 |
| 8.3 Evaluation of the Excited State Potential of <b>1a</b> .....                                      | 20 |
| 9. HRMS of nitrosoarene (II).....                                                                     | 21 |
| 10. Characterization of substrates and products .....                                                 | 22 |
| 10.1. Characterization of substrates .....                                                            | 22 |
| 10.2. Characterization of products .....                                                              | 27 |
| 11. References .....                                                                                  | 51 |
| Appendix: <sup>1</sup> H NMR, <sup>13</sup> C NMR, <sup>19</sup> F NMR spectra for new compounds..... | 54 |

## 1. General information

Commercially available materials and dry solvents purchased from Energy Chemical, J&K and Leyan were used as received. Unless otherwise specified, all reactions were prepared using 10 mL quartz tube under N<sub>2</sub> atmosphere in glove-box from Mbraun (UNILAB SP). All reactions were performed in a WATTCAS WP-TEC-1020SL photochemical reactor (for more details please see page S5-S7). Proton nuclear magnetic resonance (<sup>1</sup>H NMR) spectra were recorded on a Bruker (AVANCE III HD 400 MHz) spectrometer. The chemical shift values were corrected to 7.26 ppm (<sup>1</sup>H NMR) and 77.00 ppm (<sup>13</sup>C NMR) for CHCl<sub>3</sub>. The chemical shift values were corrected to 2.50 ppm (<sup>1</sup>H NMR) and 39.52 ppm (<sup>13</sup>C NMR) for DMSO. <sup>1</sup>H NMR splitting patterns are designated as singlet (s), doublet (d), triplet (t), quartet (q), dd (doublet of doublets); m (multiplets), and etc. All first-order splitting patterns were assigned on the basis of the appearance of the multiplet. Splitting patterns that could not be easily interpreted are designated as multiplet (m) or broad (br). Carbon nuclear magnetic resonance (<sup>13</sup>C NMR) spectra were recorded on a Bruker (AVANCE III HD 101 MHz) spectrometer. Fluorine (<sup>19</sup>F) nuclear magnetic resonance (<sup>19</sup>F NMR) spectra were recorded on a Bruker (AVANCE III HD 376 MHz) spectrometer. The melting points (m.p.) of the title compounds were determined when left untouched on an XT-4-MP apparatus from Beijing Tech. Instrument Co. (Beijing, China). High resolution mass spectrometer analysis (HRMS) was performed on Thermo Fisher Q Exactive mass spectrometer. Structure of the products was determined by X-ray crystallography (Bruker *d8* quest). Analytical thin-layer chromatography (TLC) was carried out pre-coated silica gel plate (0.2 mm thickness). Visualization was performed using a UV lamp. Cyclic voltammetry studies were carried out on a Thermo Fisher SP50 electrochemical workstation.

All the thiols (**2**) used in the current work are commercially available and used directly without further purification.

## 2. General procedure for nitroarenes synthesis<sup>[1-2]</sup>

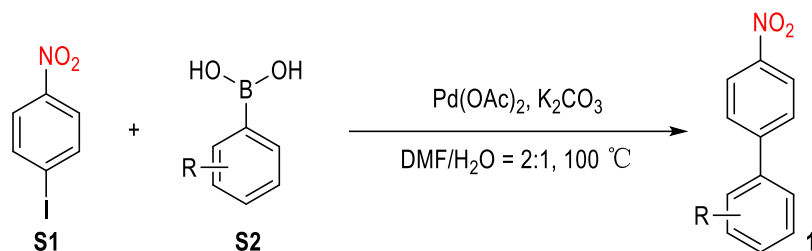

Under  $\text{N}_2$  atmosphere, to an oven-dried 250.0 mL Schlenk flask equipped with magnetic stirrer, were charged with **S1** (5.0 g, 20.0 mmol), **S2** (2.9 g, 24.0 mmol),  $\text{Pd(OAc)}_2$  (22.5 mg, 0.1 mmol),  $\text{K}_2\text{CO}_3$  (3.3 g, 24.0 mmol). DMF (66.0 mL) and  $\text{H}_2\text{O}$  (33.0 mL) were then added via syringe. The reaction mixture was allowed to stir for 30 min at  $100\text{ }^\circ\text{C}$ . After completion of the reaction (monitored by TLC), the mixture was cooled to room temperature, water (33.0 mL) was added. The resulting mixture was extracted with ethyl acetate ( $20.0\text{ mL} \times 3$ ). The combined organic layers were then washed with brine, dried over  $\text{Na}_2\text{SO}_4$  and concentrated in vacuum. The residue was purified by column chromatography on silica gel to provide the desired product **1**.

### 3. General procedure for sulfonamides synthesis

**General procedure A:** synthesis of sulfonamides (**3**) from nitroarenes (**1**) and thiols (**2**) under visible light irradiation.

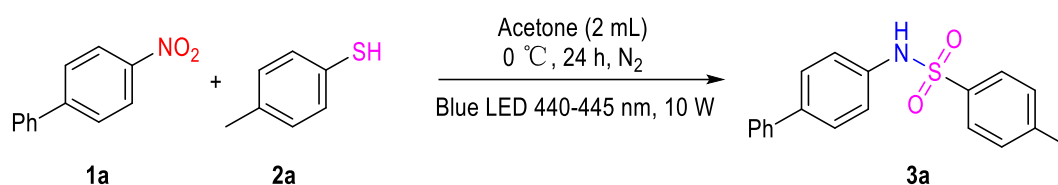

To a dry 10.0 mL quartz tube equipped with a magnetic stir bar was added **1a** (59.8 mg, 0.3 mmol) and **2a** (12.4 mg, 0.1 mmol). The reaction tube was sealed and placed under N<sub>2</sub> before acetone (2.0 mL) was added. The resulting mixture was stirred and irradiated (0.5 cm away from the LED) with blue LEDs ( $\lambda_{\text{max}} = 441 \text{ nm}$ ) for 24 hours at 0 °C. Then the mixture was purified *via* column chromatography on silica gel (petroleum ether / ethyl acetate = 10 / 1) to afford the desired product **3a**.

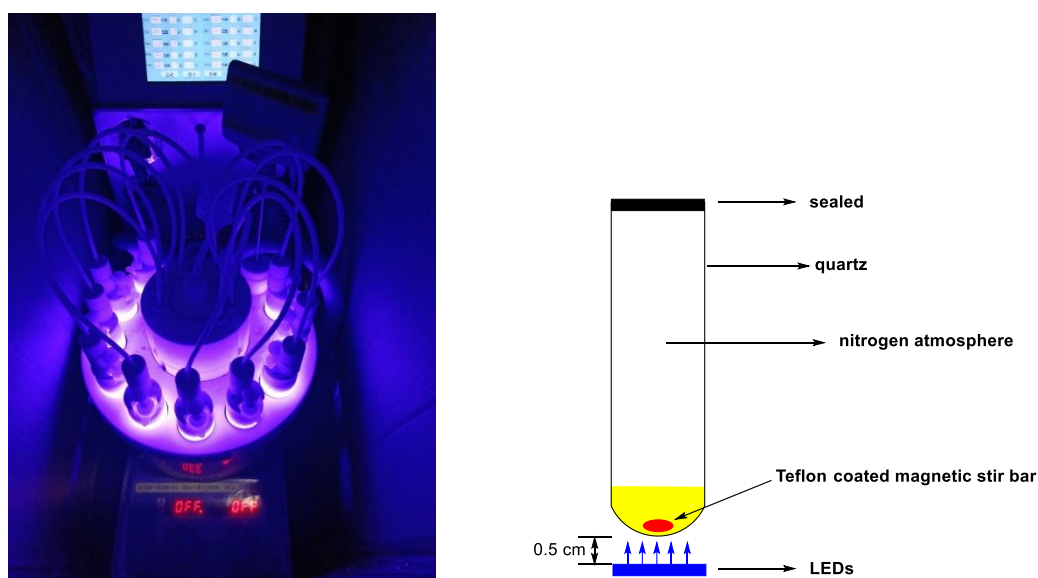

**Figure S1 Photochemical reaction device**

#### Photochemical Reaction Device Information

**Manufacturer:** WATTCAS, Xi'An, China

**Photochemical Reaction Device Model:** WP-TEC-1020SL

### LEDs Test report:

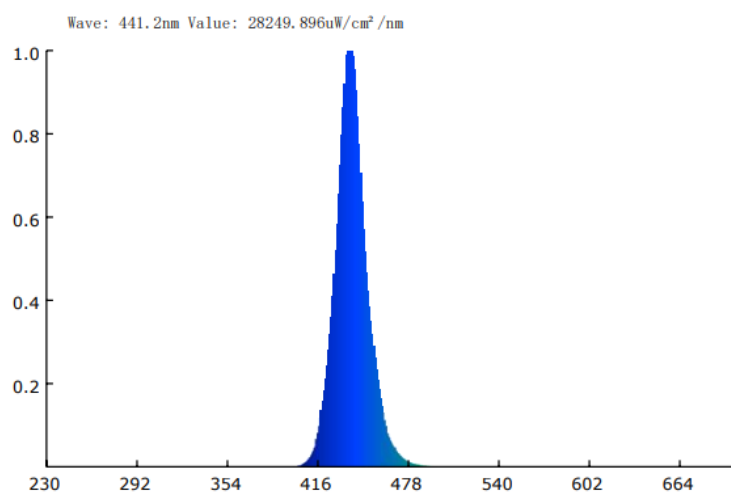

**Figure S2.** The emission spectrum and emission intensity of LEDs ( $\lambda_{\text{max}} = 441 \text{ nm}$ ) used in our general procedure. The  $\lambda_{\text{max}}$  is measured as 441 nm, and the corresponding intensity value is measured as 28249.896 uW/cm<sup>2</sup>/nm (0.3 cm away from the LED).

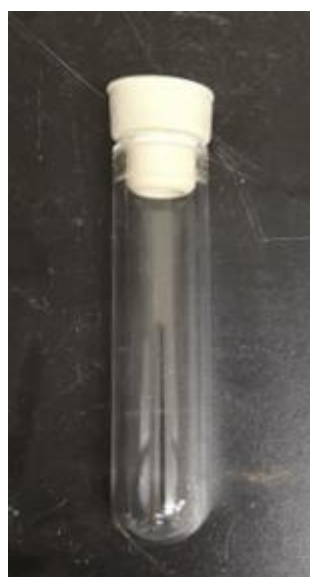

**Figure S3.** Picture of reaction tube: 10 mL quartz tube, 0.5 cm away from the LED.

**General procedure B:** synthesis of sulfonamides (**3**) from simple nitrobenzenes (**1**) and thiols (**2**) under UV light irradiation.

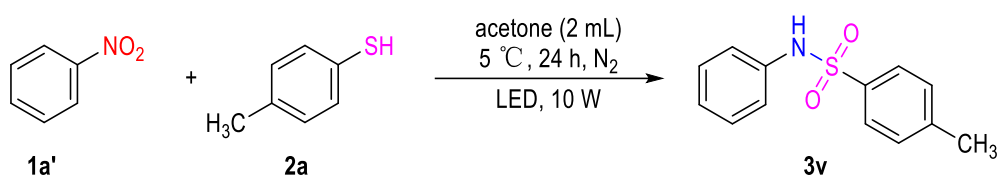

To a 10 mL Schlenk tube equipped with a stir bar was added nitrobenzene **1a'** (36.9 mg, 0.3 mmol), and **2a** (12.4 mg, 0.1 mmol). The reaction tube was sealed and placed under N<sub>2</sub> before acetone (2.0 mL) was added. The resulting mixture was stirred and irradiated (0.5 cm away from the LED) with blue LEDs ( $\lambda_{\text{max}} = 366 \text{ nm}$ ) for 24 hours at 5 °C. Then the mixture was purified *via* column chromatography on silica gel (petroleum ether / ethyl acetate = 15 / 1) to afford the desired product **3v**.

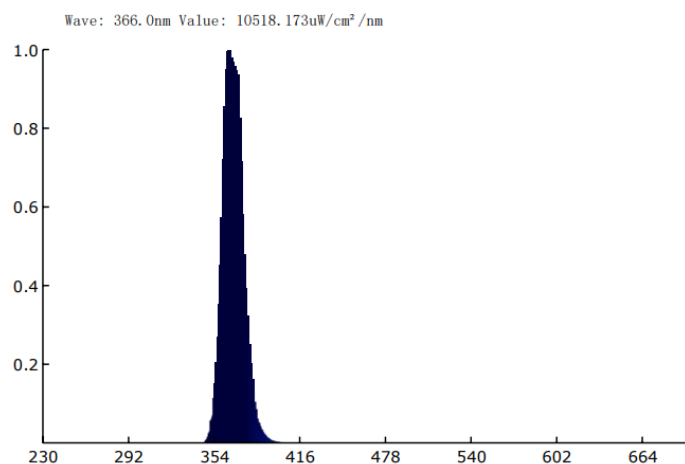

**Figure S4.** The emission spectrum and emission intensity of LEDs ( $\lambda_{\text{max}} = 366 \text{ nm}$ ) used in our general procedure B. The  $\lambda_{\text{max}}$  is measured as 366 nm, and the corresponding intensity value is measured as 10518.173 uW/cm<sup>2</sup>/nm (0.3 cm away from the LED).

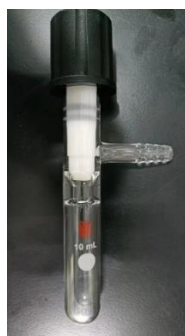

**Figure S5.** Picture of reaction tube: 10 mL Schlenk tube, 0.5 cm away from the LED.

## 4. Condition optimizations

**Table S1** Influence of solvent<sup>a</sup>

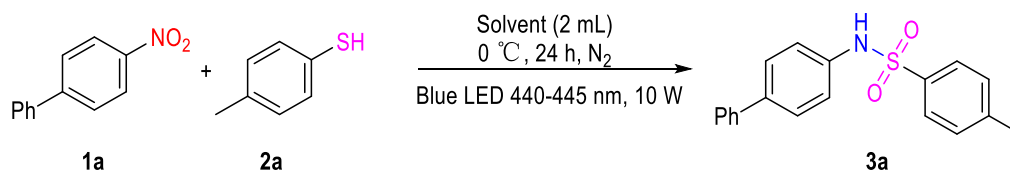

| Entry | Solvent      | Yield (%) <sup>b</sup> |
|-------|--------------|------------------------|
| 1     | Acetone      | 64                     |
| 2     | EA           | 47                     |
| 3     | THF          | 40                     |
| 4     | Acetonitrile | 51                     |
| 5     | Toluene      | 54                     |

<sup>a</sup> Standard condition: **1a** (0.3 mmol), **2a** (0.1 mmol) in solvent (2.0 mL), blue LED, N<sub>2</sub> atmosphere, 0 °C, 24 h. <sup>b</sup> Isolated yields.

**Table S2** Influence of **1a/2a**<sup>a</sup>

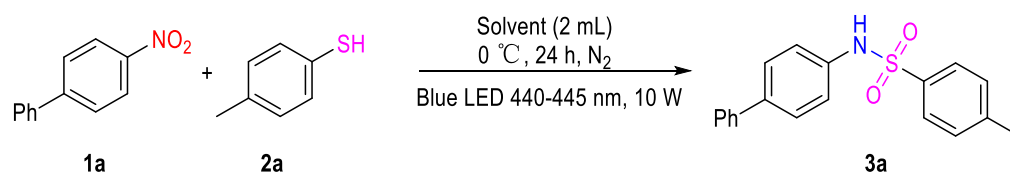

| Entry | <b>1a/2a</b> | Yield (%) <sup>b</sup> |
|-------|--------------|------------------------|
| 1     | 3:1          | 62                     |
| 2     | 2:1          | 55                     |
| 3     | 1:1          | 47                     |
| 4     | 1:2          | 39                     |
| 5     | 1:3          | 28                     |

<sup>a</sup> Standard condition: **1a** and **2a** in acetone (2.0 mL), blue LED, N<sub>2</sub> atmosphere, 0 °C, 24 h.

<sup>b</sup> Isolated yields.



**Table S3** Screening of wavelength for simple nitrobenzenes<sup>a</sup>

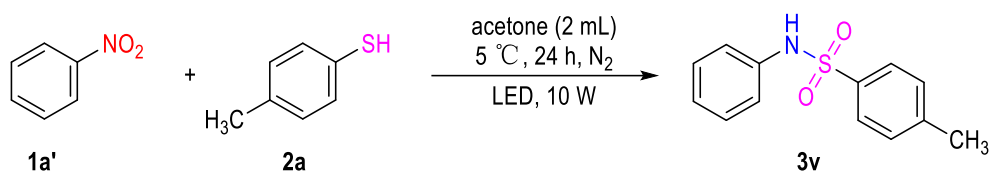

| Entry | Wavelength                      | Yield (%) <sup>b</sup> |
|-------|---------------------------------|------------------------|
| 1     | $\lambda_{\text{max}}$ = 460 nm | Trace                  |
| 2     | $\lambda_{\text{max}}$ = 440 nm | 22                     |
| 3     | $\lambda_{\text{max}}$ = 395 nm | 35                     |
| 4     | $\lambda_{\text{max}}$ = 366 nm | 49                     |

<sup>a</sup> Standard condition: **1a** and **2a** in acetone (2.0 mL), LED, N<sub>2</sub> atmosphere, 5 °C, 24 h.

<sup>b</sup> Isolated yields.

## 5. Structure determination via X-ray crystallographic analysis

Good quality crystal of **3ag** (colourless needle crystal) was obtained by vaporization of a petroleum ether / dichloromethane solution of cycloaddition compound **3ag** (~60mg). A suitable crystal with dimensions  $0.1 \times 0.16 \times 0.2 \text{ mm}^3$  was selected and mounted on a Bruker APEX-II CCD diffractometer. CCDC **2168659** contains the supplementary crystallographic data for this paper. The crystal was kept at a steady  $T = 298 \text{ K}$  during data collection. These data can be obtained free of charge from The Cambridge Crystallographic Data Centre via <https://www.ccdc.cam.ac.uk/>.

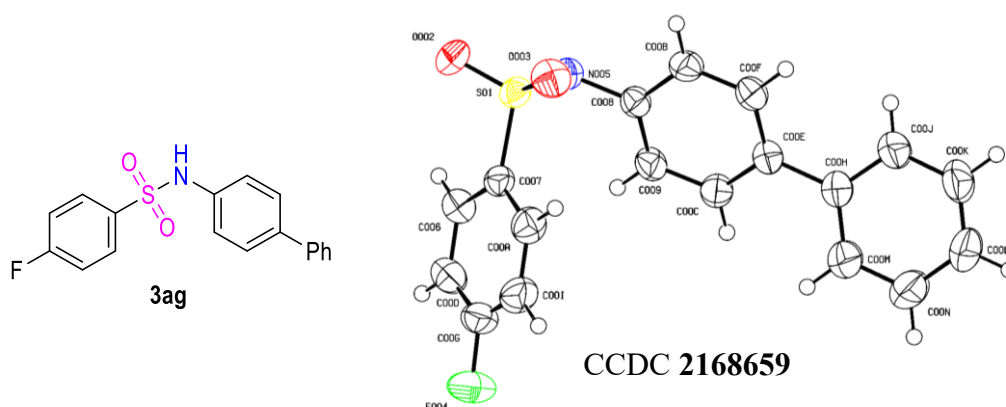

**Table S4 Fractional Atomic Coordinates ( $\times 10^4$ ) and Equivalent Isotropic Displacement Parameters ( $\text{\AA}^2 \times 10^3$ ) for 3ag.  $U_{eq}$  is defined as 1/3 of the trace of the orthogonalised  $U_{IJ}$  tensor.**

| Atom | <i>x</i>  | <i>y</i>  | <i>z</i>   | $U_{eq}$  |
|------|-----------|-----------|------------|-----------|
| S01  | 6095.9(8) | 6192.6(6) | 4525.2(2)  | 39.86(19) |
| O002 | 6587(3)   | 6302(3)   | 4972.5(5)  | 57.3(5)   |
| O003 | 7755(3)   | 5916(2)   | 4218.4(6)  | 54.7(4)   |
| F004 | -601(4)   | 1244(3)   | 4278.7(7)  | 87.0(6)   |
| N005 | 4947(3)   | 7972(2)   | 4407.9(5)  | 39.7(4)   |
| C006 | 2494(4)   | 4532(3)   | 4753.0(7)  | 44.0(5)   |
| C007 | 4159(3)   | 4627(2)   | 4461.5(6)  | 38.0(4)   |
| C008 | 4313(3)   | 8208(2)   | 3968.8(6)  | 37.1(4)   |
| C009 | 2274(4)   | 7805(3)   | 3835.5(7)  | 44.1(5)   |
| C00A | 4246(4)   | 3550(3)   | 4112.8(7)  | 50.4(6)   |
| C00B | 5772(4)   | 8854(3)   | 3678.3(7)  | 45.5(5)   |
| C00C | 1721(4)   | 8004(3)   | 3407.7(7)  | 46.8(5)   |
| C00D | 893(4)    | 3374(3)   | 4694.4(8)  | 51.8(5)   |
| C00E | 3174(4)   | 8589(3)   | 3106.1(6)  | 41.5(5)   |
| C00F | 5195(4)   | 9045(3)   | 3252.1(7)  | 47.1(5)   |
| C00G | 1009(5)   | 2348(3)   | 4344.8(9)  | 55.6(6)   |
| C00H | 2583(4)   | 8697(3)   | 2642.8(7)  | 45.9(5)   |
| C00I | 2636(5)   | 2396(3)   | 4054.2(8)  | 59.9(7)   |
| C00J | 3648(5)   | 9744(3)   | 2362.4(8)  | 57.7(6)   |
| C00K | 3080(6)   | 9809(4)   | 1931.3(8)  | 66.9(8)   |
| C00L | 1465(6)   | 8867(5)   | 1778.2(8)  | 69.1(8)   |
| C00M | 982(6)    | 7702(5)   | 2478.2(9)  | 73.5(9)   |
| C00N | 410(7)    | 7798(6)   | 2048.9(10) | 89.1(12)  |

**Table S5 Anisotropic Displacement Parameters ( $\text{\AA}^2 \times 10^3$ ) for 3ag. The Anisotropic displacement factor exponent takes the form:  $-2\pi^2[h^2a^{*2}U_{11}+2hka^*b^*U_{12}+...]$ .**

| Atom | $U_{11}$ | $U_{22}$ | $U_{33}$  | $U_{23}$ | $U_{13}$  | $U_{12}$  |
|------|----------|----------|-----------|----------|-----------|-----------|
| S01  | 33.3(3)  | 48.5(3)  | 37.8(3)   | 0.52(19) | -3.69(18) | -2.2(2)   |
| O002 | 56.0(10) | 71.6(11) | 44.4(8)   | 4.1(8)   | -17.4(7)  | -9.9(9)   |
| O003 | 37.5(8)  | 63.6(11) | 63.1(10)  | 1.7(8)   | 6.8(7)    | 4.0(8)    |
| F004 | 84.9(13) | 71.5(11) | 104.7(14) | 2.3(10)  | -22.9(11) | -36.8(11) |
| N005 | 39.1(9)  | 43.4(9)  | 36.7(8)   | -3.0(7)  | 3.5(7)    | -1.9(7)   |

| <b>Atom</b> | <b>U<sub>11</sub></b> | <b>U<sub>22</sub></b> | <b>U<sub>33</sub></b> | <b>U<sub>23</sub></b> | <b>U<sub>13</sub></b> | <b>U<sub>12</sub></b> |
|-------------|-----------------------|-----------------------|-----------------------|-----------------------|-----------------------|-----------------------|
| C006        | 44.5(12)              | 41.7(10)              | 45.8(11)              | 0.8(8)                | 3.6(9)                | 1.8(9)                |
| C007        | 39.6(10)              | 35.5(9)               | 38.9(9)               | 1.0(7)                | -5.4(8)               | 1.4(8)                |
| C008        | 37.0(10)              | 37.7(9)               | 36.7(9)               | 0.5(7)                | 3.1(8)                | -0.3(8)               |
| C009        | 36.9(11)              | 52.6(11)              | 42.8(11)              | 6.9(9)                | 6.3(9)                | -5.1(9)               |
| C00A        | 58.3(14)              | 51.0(12)              | 42.0(10)              | -5.7(9)               | 3.5(10)               | 1.4(11)               |
| C00B        | 36.9(11)              | 54.2(12)              | 45.5(10)              | 0.1(9)                | 2.5(9)                | -9.9(10)              |
| C00C        | 35.6(11)              | 59.9(13)              | 44.8(11)              | 7.5(9)                | -1.5(9)               | -5.6(9)               |
| C00D        | 46.8(13)              | 45.9(11)              | 62.8(13)              | 10.4(10)              | 1.9(11)               | -2.5(10)              |
| C00E        | 43.1(11)              | 42.4(10)              | 39.0(9)               | 4.4(8)                | 2.3(8)                | 0.4(9)                |
| C00F        | 42.0(11)              | 58.3(13)              | 41.0(10)              | 5.5(9)                | 8.4(9)                | -10.0(10)             |
| C00G        | 57.9(14)              | 41.9(11)              | 67.0(14)              | 6.7(10)               | -15.0(13)             | -10.5(11)             |
| C00H        | 48.8(12)              | 48.3(11)              | 40.6(10)              | 3.5(9)                | 2.9(9)                | 1.5(11)               |
| C00I        | 80.7(19)              | 45.9(12)              | 53.1(13)              | -9.0(10)              | -12.4(13)             | -3.2(13)              |
| C00J        | 69.8(17)              | 58.4(14)              | 45.0(11)              | 4.9(10)               | 4.3(12)               | -13.3(13)             |
| C00K        | 93(2)                 | 65.6(16)              | 42.0(12)              | 9.8(11)               | 8.3(13)               | -10.4(16)             |
| C00L        | 83(2)                 | 87(2)                 | 37.9(11)              | 5.8(12)               | -3.9(12)              | -5.7(18)              |
| C00M        | 76(2)                 | 96(2)                 | 48.0(13)              | 12.9(13)              | -3.2(14)              | -32.8(19)             |
| C00N        | 93(3)                 | 125(3)                | 49.6(14)              | 4.9(17)               | -11.7(16)             | -46(2)                |

**Table S6 Bond Lengths for 3ag.**

| <b>Atom</b> | <b>Atom</b> | <b>Length/Å</b> | <b>Atom</b> | <b>Atom</b> | <b>Length/Å</b> |
|-------------|-------------|-----------------|-------------|-------------|-----------------|
| S01         | O002        | 1.4318(16)      | C00B        | C00F        | 1.386(3)        |
| S01         | O003        | 1.4303(18)      | C00C        | C00E        | 1.391(3)        |
| S01         | N005        | 1.6369(19)      | C00D        | C00G        | 1.367(4)        |
| S01         | C007        | 1.756(2)        | C00E        | C00F        | 1.394(3)        |
| F004        | C00G        | 1.357(3)        | C00E        | C00H        | 1.494(3)        |
| N005        | C008        | 1.439(3)        | C00G        | C00I        | 1.365(4)        |
| C006        | C007        | 1.386(3)        | C00H        | C00J        | 1.383(3)        |
| C006        | C00D        | 1.378(3)        | C00H        | C00M        | 1.380(4)        |
| C007        | C00A        | 1.389(3)        | C00J        | C00K        | 1.392(4)        |
| C008        | C009        | 1.382(3)        | C00K        | C00L        | 1.349(5)        |
| C008        | C00B        | 1.387(3)        | C00L        | C00N        | 1.372(5)        |
| C009        | C00C        | 1.388(3)        | C00M        | C00N        | 1.389(4)        |
| C00A        | C00I        | 1.380(4)        |             |             |                 |

**Table S7 Bond Angles for 3ag.**

| Atom | Atom | Atom | Angle/°    | Atom | Atom | Atom | Angle/°  |
|------|------|------|------------|------|------|------|----------|
| O002 | S01  | N005 | 105.01(11) | C00G | C00D | C006 | 118.1(2) |
| O002 | S01  | C007 | 107.62(10) | C00C | C00E | C00F | 117.5(2) |
| O003 | S01  | O002 | 120.35(12) | C00C | C00E | C00H | 120.8(2) |
| O003 | S01  | N005 | 107.74(10) | C00F | C00E | C00H | 121.7(2) |
| O003 | S01  | C007 | 108.45(11) | C00B | C00F | C00E | 121.4(2) |
| N005 | S01  | C007 | 106.95(10) | F004 | C00G | C00D | 118.2(3) |
| C008 | N005 | S01  | 116.63(14) | F004 | C00G | C00I | 118.2(2) |
| C00D | C006 | C007 | 119.9(2)   | C00I | C00G | C00D | 123.6(2) |
| C006 | C007 | S01  | 119.03(15) | C00J | C00H | C00E | 121.8(2) |
| C006 | C007 | C00A | 120.6(2)   | C00M | C00H | C00E | 120.4(2) |
| C00A | C007 | S01  | 120.27(18) | C00M | C00H | C00J | 117.7(2) |
| C009 | C008 | N005 | 120.77(18) | C00G | C00I | C00A | 118.5(2) |
| C009 | C008 | C00B | 119.98(19) | C00H | C00J | C00K | 120.7(3) |
| C00B | C008 | N005 | 119.25(19) | C00L | C00K | C00J | 120.8(3) |
| C008 | C009 | C00C | 119.6(2)   | C00K | C00L | C00N | 119.5(3) |
| C00I | C00A | C007 | 119.4(2)   | C00H | C00M | C00N | 121.0(3) |
| C00F | C00B | C008 | 119.7(2)   | C00L | C00N | C00M | 120.2(3) |
| C009 | C00C | C00E | 121.7(2)   |      |      |      |          |

**Table S8 Torsion Angles for 3ag.**

| A    | B    | C    | D    | Angle/°     | A    | B    | C    | D    | Angle/°    |
|------|------|------|------|-------------|------|------|------|------|------------|
| S01  | N005 | C008 | C009 | 93.1(2)     | C009 | C008 | C00B | C00F | -1.9(3)    |
| S01  | N005 | C008 | C00B | -87.1(2)    | C009 | C00C | C00E | C00F | -2.8(4)    |
| S01  | C007 | C00A | C00I | -176.0(2)   | C009 | C00C | C00E | C00H | 176.3(2)   |
| O002 | S01  | N005 | C008 | 178.96(16)  | C00B | C008 | C009 | C00C | 1.9(3)     |
| O002 | S01  | C007 | C006 | 41.8(2)     | C00C | C00E | C00F | C00B | 2.8(4)     |
| O002 | S01  | C007 | C00A | -141.09(19) | C00C | C00E | C00H | C00J | 158.3(3)   |
| O003 | S01  | N005 | C008 | 49.54(18)   | C00C | C00E | C00H | C00M | -23.8(4)   |
| O003 | S01  | C007 | C006 | 173.49(17)  | C00D | C006 | C007 | S01  | 176.28(17) |
| O003 | S01  | C007 | C00A | -9.4(2)     | C00D | C006 | C007 | C00A | -0.8(3)    |
| F004 | C00G | C00I | C00A | 178.1(2)    | C00D | C00G | C00I | C00A | -0.6(4)    |
| N005 | S01  | C007 | C006 | -70.57(18)  | C00E | C00H | C00J | C00K | 179.3(3)   |
| N005 | S01  | C007 | C00A | 106.53(19)  | C00E | C00H | C00M | C00N | 179.6(3)   |
| N005 | C008 | C009 | C00C | -178.3(2)   | C00F | C00E | C00H | C00J | -22.6(3)   |
| N005 | C008 | C00B | C00F | 178.3(2)    | C00F | C00E | C00H | C00M | 155.3(3)   |

| Atom | Atom | Atom | Angle/° |            | Atom | Atom | Atom | Angle/° |           |
|------|------|------|---------|------------|------|------|------|---------|-----------|
| C006 | C007 | C00A | C00I    | 1.0(4)     | C00H | C00E | C00F | C00B    | -176.3(2) |
| C006 | C00D | C00G | F004    | -177.8(2)  | C00H | C00J | C00K | C00L    | 0.7(5)    |
| C006 | C00D | C00G | C00I    | 0.8(4)     | C00H | C00M | C00N | C00L    | 1.4(7)    |
| C007 | S01  | N005 | C008    | -66.87(17) | C00J | C00H | C00M | C00N    | -2.4(5)   |
| C007 | C006 | C00D | C00G    | -0.1(3)    | C00J | C00K | C00L | C00N    | -1.8(6)   |
| C007 | C00A | C00I | C00G    | -0.4(4)    | C00K | C00L | C00N | C00M    | 0.8(7)    |
| C008 | C009 | C00C | C00E    | 0.5(4)     | C00M | C00H | C00J | C00K    | 1.4(4)    |
| C008 | C00B | C00F | C00E    | -0.5(4)    |      |      |      |         |           |

**Table S9 Hydrogen Atom Coordinates ( $\text{\AA} \times 10^4$ ) and Isotropic Displacement Parameters ( $\text{\AA}^2 \times 10^3$ ) for 3ag.**

| Atom | <i>x</i> | <i>y</i> | <i>z</i> | U(eq) |
|------|----------|----------|----------|-------|
| H005 | 3922.23  | 8197.25  | 4581.93  | 48    |
| H006 | 2457.22  | 5248.85  | 4987.6   | 53    |
| H009 | 1278.94  | 7403.69  | 4031.16  | 53    |
| H00A | 5378.26  | 3607.03  | 3920.66  | 61    |
| H00B | 7132.16  | 9156.64  | 3769.03  | 55    |
| H00C | 342.81   | 7738.29  | 3320.54  | 56    |
| H00D | -234.82  | 3292.74  | 4887.19  | 62    |
| H00F | 6176.63  | 9486.39  | 3059.4   | 57    |
| H00I | 2659.58  | 1667.12  | 3821.94  | 72    |
| H00J | 4755.28  | 10411.38 | 2462.94  | 69    |
| H00K | 3823.56  | 10511.25 | 1746.42  | 80    |
| H00L | 1070.82  | 8941.45  | 1491.39  | 83    |
| H00M | 276.39   | 6955.57  | 2657.41  | 88    |
| H00N | -693.73  | 7136.18  | 1944.46  | 107   |

## 6. Mechanistic studies

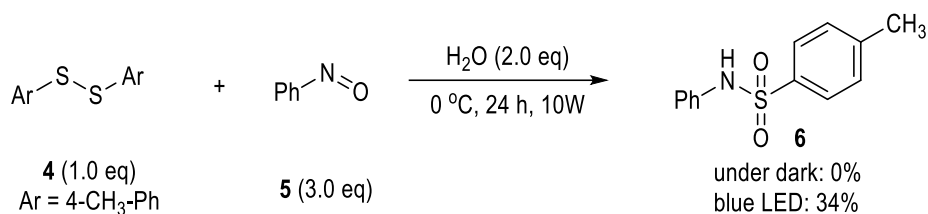

In gloves box, to a dried 10 mL quartz tube equipped with a stir bar was added **4** (12.3 mg, 0.05 mmol), **5** (16.1 mg, 0.15 mmol) and acetone (2.0 mL). The quartz tube was sealed and took out from the gloves box and H<sub>2</sub>O (1.8 mg, 0.1 mmol) was added by microliter syringe. The resulting mixture was stirred at 0 °C for 24 hours in photochemical reaction device. Then the mixture was purified *via* column chromatography on silica gel (petroleum ether / ethyl acetate = 10 / 1) to afford the desired product **6** (8.4 mg, 34% yield).

The <sup>1</sup>H NMR data of (**6**) matches the reported one.<sup>[3]</sup> **6** <sup>1</sup>H NMR (400 MHz, CDCl<sub>3</sub>) δ 7.67 – 7.63 (m, 2H), 7.26 – 7.21 (m, 4H), 7.14 – 7.08 (m, 1H), 7.08 – 7.04 (m, 2H), 6.63 (s, 1H), 2.37 (s, 3H).

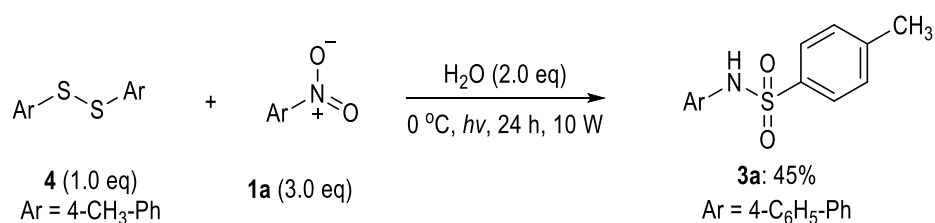

In gloves box, to a dried 10 mL quartz tube equipped with a stir bar was added **4** (12.3 mg, 0.05 mmol), **5** (29.9 mg, 0.15 mmol) and acetone (2.0 mL). The quartz tube was sealed and took out from the gloves box and H<sub>2</sub>O (1.8 mg, 0.1 mmol) was added by microliter syringe. The resulting mixture was stirred at 0 °C for 24 hours in photochemical reaction device. Then the mixture was purified *via* column chromatography on silica gel (petroleum ether / ethyl acetate = 10 / 1) to afford the desired product **3a** (14.5 mg, 45% yield).

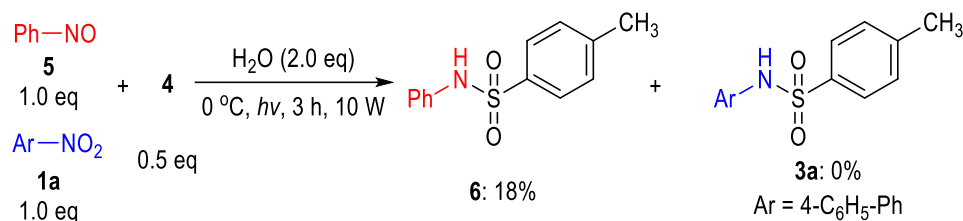

In gloves box, to a dried 10 mL quartz tube equipped with a stir bar was added **4** (12.3 mg, 0.05 mmol), **5** (29.9 mg, 0.1 mmol) or **1a** (19.9 mg, 0.1 mmol) and acetone (2.0 mL). The quartz tube was sealed and took out from the gloves box and H<sub>2</sub>O (1.8 mg, 0.1 mmol) was added by microliter syringe. The resulting mixture was stirred at 0 °C for 3 hours in photochemical reaction device. Then the mixture was purified *via* column chromatography on silica gel (petroleum ether / ethyl acetate = 10 / 1) to afford the desired product **6** (4.5 mg, 18% yield).

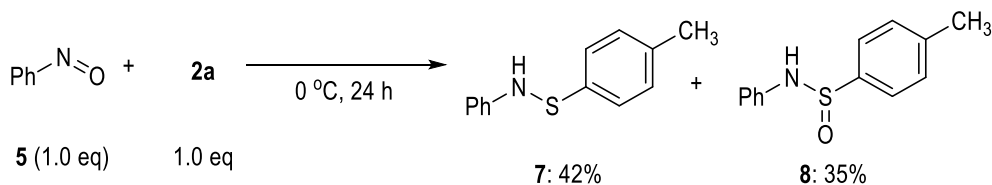

In gloves box, to a dried 10 mL quartz tube equipped with a stir bar was added **5** (10.7 mg, 0.1 mmol), **2a** (12.4 mg, 0.1 mmol) and acetone (2.0 mL). The quartz tube was sealed and took out from the gloves box. The resulting mixture was stirred at 0 °C for 24 hours. Then the mixture was purified *via* column chromatography on silica gel (petroleum ether / ethyl acetate = 10 / 1) to afford sulfenamide **7** (9.0 mg, 42% yield) and sulfinamide **8** (8.1 mg, 35% yield).

The <sup>1</sup>H NMR data of Sulfenamide (**7**) matches the reported one.<sup>[4]</sup> **<sup>1</sup>H NMR** (400 MHz, CDCl<sub>3</sub>) δ 7.21 (dd, *J* = 8.6, 7.2 Hz, 2H), 7.11 (d, *J* = 6.9 Hz, 4H), 7.03 (dd, *J* = 8.7, 1.1 Hz, 2H), 6.86 (tt, *J* = 7.3, 1.1 Hz, 1H), 5.17 (s, 1H), 2.29 (s, 3H).

The <sup>1</sup>H NMR data of Sulfinamide (**8**) matches the reported one.<sup>[5]</sup> **<sup>1</sup>H NMR** (400 MHz, CDCl<sub>3</sub>) δ 7.62 (d, *J* = 8.2 Hz, 2H), 7.28 (d, *J* = 8.0 Hz, 2H), 7.25 – 7.21 (m, 2H), 7.10 – 7.06 (m, 2H), 7.02 (t, *J* = 7.4 Hz, 1H), 6.59 (s, 1H), 2.41 (s, 3H).



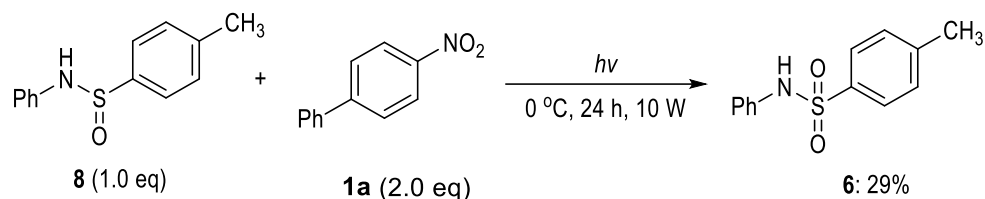

In gloves box, to a dried 10 mL quartz tube equipped with a stir bar was added **5** (10.7 mg, 0.1 mmol), **2a** (12.4 mg, 0.1 mmol) and acetone (2.0 mL). The quartz tube was sealed and took out from the gloves box. The resulting mixture was stirred at 0 °C for 24 hours in photochemical reaction device. Then the mixture was purified *via* column chromatography on silica gel (petroleum ether / ethyl acetate = 10 / 1) to afford the desired product **6** (7.2 mg, 29% yield).

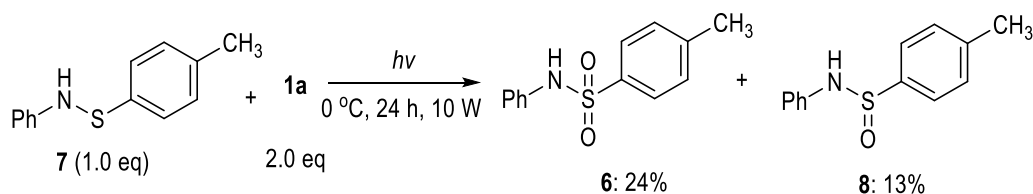

In gloves box, to a dried 10 mL quartz tube equipped with a stir bar was added **5** (10.7 mg, 0.1 mmol), **2a** (12.4 mg, 0.1 mmol) and acetone (2.0 mL). The quartz tube was sealed and took out from the gloves box. The resulting mixture was stirred at 0 °C for 24 hours in photochemical reaction device. Then the mixture was purified *via* column chromatography on silica gel (petroleum ether / ethyl acetate = 10 / 1) to afford the desired product **6** (6.0 mg, 24% yield) and **8** (3.1 mg, 13% yield).

## 7. Large scale reaction for 3a synthesis

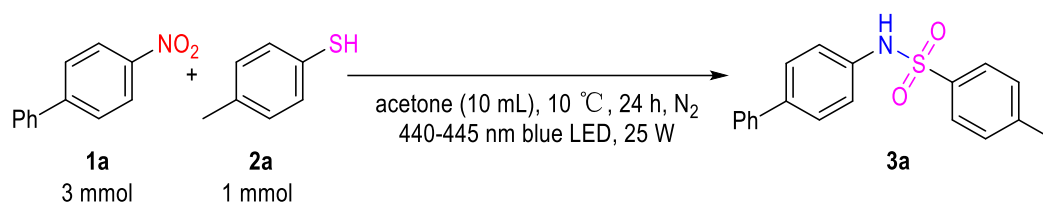

To a dry 10.0 mL quartz tube equipped with a magnetic stir bar was added **1a** (598.0 mg, 3 mmol) and **2a** (124.0 mg, 1 mmol). The reaction tube was sealed and placed under N<sub>2</sub> before acetone (10.0 mL) was added. The resulting mixture was stirred and irradiated (0.5 cm away from the LED) with blue LEDs ( $\lambda_{\text{max}} = 441\text{ nm}$ )

for 24 hours at 10 °C. Then the mixture was purified *via* column chromatography on silica gel (petroleum ether / ethyl acetate = 10 / 1) to afford the desired product **3a**.

Limited to the size of the photo reactor and the location of the LEDs (below the reaction tubes), large scale reaction encountered low yield due to the lower utilization rate of the light. For example, when the model reaction was conducted in 1.0 mmol scale, the desired sulfonamide **3a** was obtained in 35% yield (112.0 mg). Fortunately, the reaction mixture of our method is clear solution, which is a big advantage for large scale reaction via flow chemistry. We are searching for further exploration and cooperation.

## 8. Estimation of the excited potential of 1a

### 8.1 UV-Vis absorption experiments

The UV-Vis absorption spectra were measured on a SHIMADZU UV-3600 UV/Vis spectrometer.

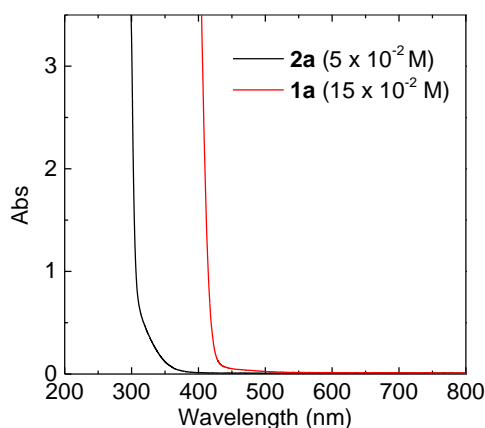

**Figure S7: UV-Vis absorption spectra of 1a and 2a under reaction concentration**

The absorption spectrum of nitroarene (**1a**) revealed a significant absorption of visible light, and the tail wavelength reached over 450 nm (Figure S7, red line). In contrast, **2a** (Figure S7, black line) has no absorptions at the visible light region ( $> 400$  nm).

### 8.2 Cyclic Voltammetry Studies

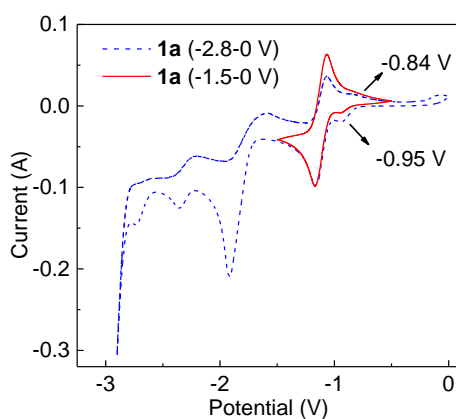

**Figure S8: Cyclic voltammogram of 1a**

The cyclic voltammogram of **1a** (0.01 M) was measured in [0.1 M] TBAPF<sub>6</sub> in CH<sub>3</sub>CN under room temperature. Sweep rate: 100 mV/s. Pt electrode working electrode, calomel electrode reference electrode, Pt wire auxiliary electrode. Scan direction: from 0 V to -2.8 V, then back to 0 V. Plotting convention: IUPAC. The cyclic voltammograms of **1a** in MeCN features multi steps of sequential single electron reduction processes (Figure S8), and the first reductive potential of **1a** was measured as -0.95 V (vs SCE).

### 8.3 Evaluation of the Excited State Potential of **1a**

Based on the data collected from the UV-vis absorption spectra (Figure S7) and cyclic voltammetry studies (Figure S8), the excited state potential of **1a** was estimated from the following equation<sup>[6]</sup>.

$$E(\mathbf{1a}^*/\bar{\mathbf{1a}}) = E(\mathbf{1a}/\bar{\mathbf{1a}}) + E_{0-0}(\mathbf{1a}^*/\mathbf{1a})$$

The excited state energy of acyl azolium intermediate **1a** ( $E_{0-0}$ ) was estimated spectroscopically from the position of the tail wavelength of absorption spectrum of **1a** (Figure S7). The tail wavelength of absorption spectrum of **1a** was estimated at 450 nm, which translates into an  $E_{0-0}$  as 2.75 eV.

$$E(\mathbf{1a}^*/\bar{\mathbf{1a}}) = -0.95 \text{ V} + 2.75 \text{ V} = +1.80 \text{ V (vs SCE)}$$

The estimated redox potential of excited state of **1a** is higher than thiol (**2a**,  $E_{\text{ox}} = +1.47 \text{ V vs SCE}$ , Figure S8), indicating that thermodynamically SET oxidation of **2a** by **1a** (at its excited state) is feasible.

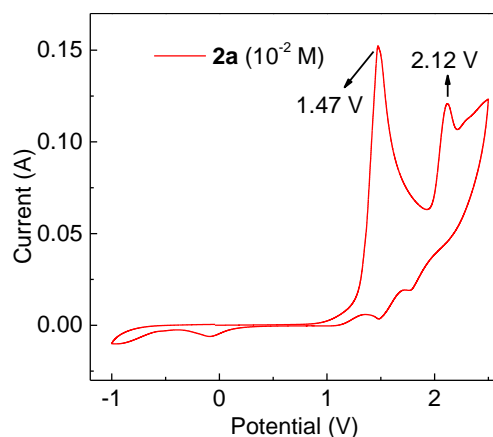

**Figure S9: Cyclic voltammogram of 2a**

The cyclic voltammogram of **2a** (0.01 M) was measured in [0.1 M] TBAPF<sub>6</sub> in CH<sub>3</sub>CN under room temperature. Sweep rate: 100 mV/s. Pt electrode working electrode, calomel electrode reference electrode, Pt wire auxiliary electrode. Scan direction: from -1.0 V to +2.5 V, then back to -1.0 V. Plotting convention: IUPAC.

## 9. HRMS of nitrosoarene (II)

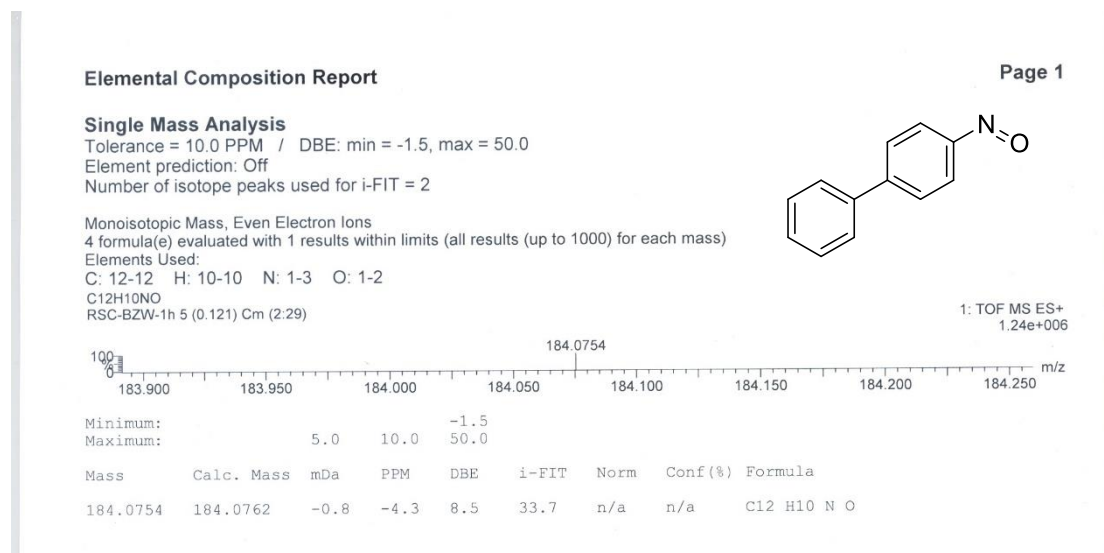

**Figure S10: HRMS of nitrosoarene (II)**

## 10. Characterization of substrates and products

All the thiols (**2**) used in this work were purchased from Energy Chemical, J&K or Leyan, and were used directly without further purification.

### 10.1. Characterization of substrates

#### 4-nitro-1,1'-biphenyl (**1a**)<sup>[2]</sup>

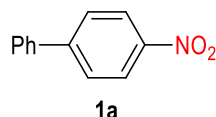

Purified by flash column chromatography on silica gel (petroleum ether/ethyl acetate = 100/1). White solid, 70% yield, 2.8 g, m.p. 113-115 °C. **<sup>1</sup>H NMR** (400 MHz, CDCl<sub>3</sub>)  $\delta$  8.30 (d,  $J$  = 8.8 Hz, 2H), 7.74 (d,  $J$  = 8.8 Hz, 2H), 7.66 – 7.59 (m, 2H), 7.55 – 7.39 (m, 3H). **<sup>13</sup>C NMR** (101 MHz, CDCl<sub>3</sub>)  $\delta$  147.7, 147.1, 138.8, 129.2, 129.0, 127.8, 127.4, 124.1.

#### 4-(*tert*-butyl)-4'-nitro-1,1'-biphenyl (**1b**)<sup>[7]</sup>

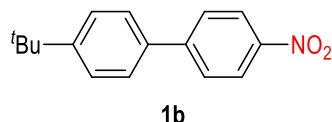

Purified by flash column chromatography on silica gel (petroleum ether/ethyl acetate = 100/1). White solid, 92% yield, 4.7 g, m.p. 111-113 °C. **<sup>1</sup>H NMR** (400 MHz, CDCl<sub>3</sub>)  $\delta$  8.29 (d,  $J$  = 8.4 Hz, 2H), 7.73 (d,  $J$  = 8.4 Hz, 2H), 7.63 – 7.47 (m, 4H), 1.38 (s, 9H). **<sup>13</sup>C NMR** (101 MHz, CDCl<sub>3</sub>)  $\delta$  152.3, 147.5, 146.9, 135.8, 127.5, 127.1, 126.1, 124.1, 34.7, 31.2.

#### 1-methoxy-4-nitrobenzene (**1c**)<sup>[8]</sup>

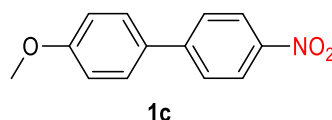

Purified by flash column chromatography on silica gel (petroleum ether/ethyl acetate = 100/1 to 30/1). White solid, 44% yield, 2.0 g, m.p. 104-105 °C. **<sup>1</sup>H NMR** (400 MHz, CDCl<sub>3</sub>)  $\delta$  8.26 (d,  $J$  = 8.9 Hz, 2H), 7.68 (d,  $J$  = 8.9 Hz, 2H), 7.58 (d,  $J$  = 8.8 Hz, 2H),

7.02 (d,  $J = 8.8$  Hz, 2H), 3.87 (s, 3H).  **$^{13}\text{C}$  NMR** (101 MHz,  $\text{CDCl}_3$ )  $\delta$  160.4, 147.2, 146.5, 131.0, 128.5, 127.0, 124.1, 114.6, 55.4.

**4'-nitro-3-(trifluoromethyl)-1,1'-biphenyl (1d)**<sup>[9]</sup>

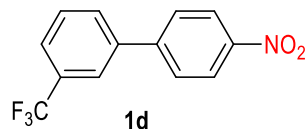

Purified by flash column chromatography on silica gel (petroleum ether/ethyl acetate = 100/1). White solid, 52% yield, 2.8 g, m.p. 84-85 °C.  **$^1\text{H}$  NMR** (400 MHz,  $\text{CDCl}_3$ )  $\delta$  8.33 (d,  $J = 8.8$  Hz, 2H), 7.86 (s, 1H), 7.81 (d,  $J = 7.7$  Hz, 1H), 7.76 (d,  $J = 8.8$  Hz, 2H), 7.71 (d,  $J = 7.8$  Hz, 1H), 7.64 (t,  $J = 7.7$  Hz, 1H).  **$^{13}\text{C}$  NMR** (101 MHz,  $\text{CDCl}_3$ )  $\delta$  147.6, 146.0, 139.7, 131.7 (q,  $J = 32.4$  Hz), 130.7, 129.7, 128.0, 125.6 (q,  $J = 3.7$  Hz), 124.3, 124.2 (q,  $J = 3.7$  Hz), 123.9 (q,  $J = 272.7$  Hz).  **$^{19}\text{F}$  NMR** (376 MHz,  $\text{CDCl}_3$ )  $\delta$  -62.7.

**4'-nitro-[1,1'-biphenyl]-4-carbonitrile (1e)**<sup>[8]</sup>

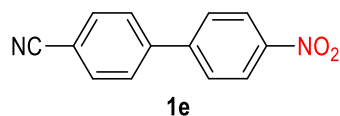

Purified by flash column chromatography on silica gel (petroleum ether/ethyl acetate = 100/1 to 50/1). White solid, 71% yield, 3.2 g, m.p. 201-202 °C.  **$^1\text{H}$  NMR** (400 MHz,  $\text{CDCl}_3$ )  $\delta$  8.34 (d,  $J = 8.8$  Hz, 2H), 7.80 (d,  $J = 8.5$  Hz, 2H), 7.74 (t,  $J = 8.9$  Hz, 4H).  **$^{13}\text{C}$  NMR** (101 MHz,  $\text{CDCl}_3$ )  $\delta$  147.9, 145.4, 143.1, 132.9, 128.14, 128.08, 124.3, 118.3, 112.6.

**2-fluoro-4'-nitro-1,1'-biphenyl (1f)**<sup>[7]</sup>

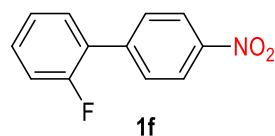

Purified by flash column chromatography on silica gel (petroleum ether/ethyl acetate = 100/1). White solid, 63% yield, 2.7 g, m.p. 82-83 °C.  **$^1\text{H}$  NMR** (400 MHz,  $\text{CDCl}_3$ )  $\delta$  8.31 (d,  $J = 8.9$  Hz, 2H), 7.72 (dd,  $J = 8.9, 1.6$  Hz, 2H), 7.47 (td,  $J = 7.8, 1.8$  Hz, 1H), 7.44 – 7.38 (m, 1H), 7.27 (td,  $J = 7.5, 1.2$  Hz, 1H), 7.21 (ddd,  $J = 10.8, 8.2, 1.2$  Hz, 1H).  **$^{13}\text{C}$  NMR** (101 MHz,  $\text{CDCl}_3$ )  $\delta$  159.6 (d,  $J = 249.3$  Hz), 147.2, 142.4, 130.6

(d,  $J = 8.3$  Hz), 130.5 (d,  $J = 2.9$  Hz), 129.8 (d,  $J = 3.5$  Hz), 126.8 (d,  $J = 12.5$  Hz), 124.8 (d,  $J = 3.7$  Hz), 123.7, 116.5 (d,  $J = 22.4$  Hz).  **$^{19}\text{F}$  NMR** (376 MHz,  $\text{CDCl}_3$ )  $\delta$  -117.2.

**2-bromo-4'-nitro-1,1'-biphenyl (1g)**<sup>[10]</sup>

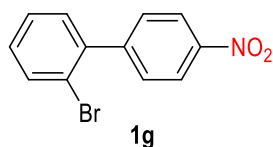

Purified by flash column chromatography on silica gel (petroleum ether/ethyl acetate = 100/1). White solid, 20% yield, 1.1 g, m.p. 79-81 °C.  **$^1\text{H}$  NMR** (400 MHz,  $\text{CDCl}_3$ )  $\delta$  8.30 (d,  $J = 8.8$  Hz, 2H), 7.71 (d,  $J = 8.0$  Hz, 1H), 7.59 (d,  $J = 8.7$  Hz, 2H), 7.42 (td,  $J = 7.5, 1.2$  Hz, 1H), 7.35 – 7.26 (m, 2H).  **$^{13}\text{C}$  NMR** (101 MHz,  $\text{CDCl}_3$ )  $\delta$  147.5, 147.2, 140.3, 133.4, 130.9, 130.5, 129.9, 127.7, 123.3, 122.0.

**3-fluoro-4'-nitro-1,1'-biphenyl (1h)**<sup>[7]</sup>

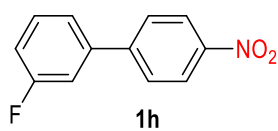

Purified by flash column chromatography on silica gel (petroleum ether/ethyl acetate = 100/1). White solid, 74% yield, 3.2 g, m.p. 85-86 °C.  **$^1\text{H}$  NMR** (400 MHz,  $\text{CDCl}_3$ )  $\delta$  8.22 (d,  $J = 8.8$  Hz, 2H), 7.64 (d,  $J = 8.8$  Hz, 2H), 7.44 – 7.35 (m, 1H), 7.32 (d,  $J = 7.9$  Hz, 1H), 7.24 (dt,  $J = 9.8, 2.1$  Hz, 1H), 7.06 (td,  $J = 8.4, 1.9$  Hz, 1H).  **$^{13}\text{C}$  NMR** (101 MHz,  $\text{CDCl}_3$ )  $\delta$  163.2 (d,  $J = 247.1$  Hz), 147.5, 146.2 (d,  $J = 2.2$  Hz), 141.0 (d,  $J = 7.4$  Hz), 130.8 (d,  $J = 8.1$  Hz), 127.9, 124.2, 123.1 (d,  $J = 3.0$  Hz), 115.8 (d,  $J = 21.1$  Hz), 114.4 (d,  $J = 22.5$  Hz).  **$^{19}\text{F}$  NMR** (376 MHz,  $\text{CDCl}_3$ )  $\delta$  -112.0.

**3-chloro-4'-nitro-1,1'-biphenyl (1i)**<sup>[11]</sup>

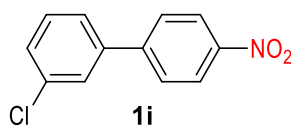

Purified by flash column chromatography on silica gel (petroleum ether/ethyl acetate = 100/1). White solid, 83% yield, 3.9 g, m.p. 89-90 °C.  **$^1\text{H}$  NMR** (400 MHz,  $\text{CDCl}_3$ )  $\delta$  8.31 (d,  $J = 8.8$  Hz, 2H), 7.71 (d,  $J = 8.9$  Hz, 2H), 7.60 (s, 1H), 7.50 (dt,  $J = 6.3, 2.5$



Hz, 1H), 7.45 – 7.40 (m, 2H). **<sup>13</sup>C NMR** (101 MHz, CDCl<sub>3</sub>) δ 147.4, 146.1, 140.6, 135.1, 130.4, 128.9, 127.9, 127.5, 125.5, 124.2.

**4-fluoro-4'-nitro-1,1'-biphenyl (1j)**<sup>[7]</sup>

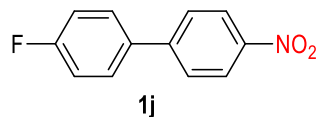

Purified by flash column chromatography on silica gel (petroleum ether/ethyl acetate = 100/1). White solid, 83% yield, 3.6 g, m.p. 124-126 °C. **<sup>1</sup>H NMR** (400 MHz, CDCl<sub>3</sub>) δ 8.29 (d, *J* = 8.9 Hz, 2H), 7.69 (d, *J* = 8.8 Hz, 2H), 7.65 – 7.54 (m, 2H), 7.19 (t, *J* = 8.6 Hz, 2H). **<sup>13</sup>C NMR** (101 MHz, CDCl<sub>3</sub>) δ 163.4 (d, *J* = 249.3 Hz), 147.1, 146.6, 134.9 (d, *J* = 3.0), 129.2 (d, *J* = 8.1), 127.7, 124.2, 116.2 (d, *J* = 21.8). **<sup>19</sup>F NMR** (376 MHz, CDCl<sub>3</sub>) δ -112.7.

**methyl 4'-nitro-[1,1'-biphenyl]-4-carboxylate (1k)**<sup>[12]</sup>

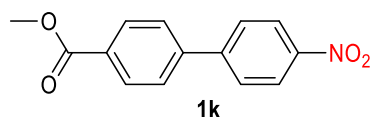

Purified by flash column chromatography on silica gel (petroleum ether/ethyl acetate = 100/1 to 30/1). White solid, 31% yield, 1.6 g, m.p. 189-190 °C. **<sup>1</sup>H NMR** (400 MHz, CDCl<sub>3</sub>) δ 8.32 (d, *J* = 8.9 Hz, 2H), 8.15 (d, *J* = 8.5 Hz, 2H), 7.77 (d, *J* = 8.9 Hz, 2H), 7.69 (d, *J* = 8.4 Hz, 2H), 3.96 (s, 3H). **<sup>13</sup>C NMR** (101 MHz, CDCl<sub>3</sub>) δ 166.6, 147.5, 146.3, 143.0, 130.4, 130.3, 128.1, 127.4, 124.2, 52.3.

**methyl(4'-nitro-[1,1'-biphenyl]-3-yl)sulfane (1l)**<sup>[13]</sup>

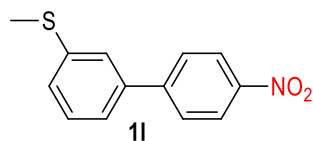

Purified by flash column chromatography on silica gel (petroleum ether/ethyl acetate = 100/1 to 30/1). Yellow solid, 82% yield, 4.0 g, m.p. 89-90 °C. **<sup>1</sup>H NMR** (400 MHz, CDCl<sub>3</sub>) δ 8.29 (d, *J* = 8.8 Hz, 2H), 7.72 (d, *J* = 8.8 Hz, 2H), 7.48 (t, *J* = 1.8 Hz, 1H), 7.42 (t, *J* = 7.5 Hz, 1H), 7.37 (dt, *J* = 7.7, 1.5 Hz, 1H), 7.32 (dt, *J* = 7.5, 1.6 Hz, 1H), 2.55 (s, 3H). **<sup>13</sup>C NMR** (101 MHz, CDCl<sub>3</sub>) δ 147.3, 147.2, 139.9, 139.5, 129.6, 127.9, 126.7, 125.4, 124.1, 15.8.

**1-(4'-nitro-[1,1'-biphenyl]-4-yl)ethan-1-one (1m)**<sup>[10]</sup>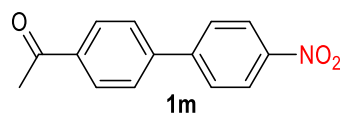

Purified by flash column chromatography on silica gel (petroleum ether/ethyl acetate = 100/1 to 50/1). White solid, 95% yield, 4.6 g, m.p. 150-151 °C. **<sup>1</sup>H NMR** (400 MHz, CDCl<sub>3</sub>) δ 8.33 (d, *J* = 8.8 Hz, 2H), 8.08 (d, *J* = 8.4 Hz, 2H), 7.78 (d, *J* = 8.8 Hz, 2H), 7.72 (d, *J* = 8.4 Hz, 2H), 2.66 (s, 3H). **<sup>13</sup>C NMR** (101 MHz, CDCl<sub>3</sub>) δ 197.5, 147.6, 146.2, 143.1, 137.1, 129.1, 128.1, 127.6, 124.2, 26.7.

**4'-nitro-[1,1'-biphenyl]-4-carbaldehyde (1n)**<sup>[14]</sup>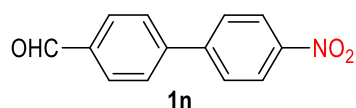

Purified by flash column chromatography on silica gel (petroleum ether/ethyl acetate = 100/1 to 50/1). White solid, 96% yield, 2.6 g, m.p. 126-128 °C. **<sup>1</sup>H NMR** (400 MHz, CDCl<sub>3</sub>) δ 10.10 (s, 1H), 8.35 (d, *J* = 8.8 Hz, 2H), 8.02 (d, *J* = 8.3 Hz, 2H), 7.79 (d, *J* = 8.6 Hz, 4H). **<sup>13</sup>C NMR** (101 MHz, CDCl<sub>3</sub>) δ 191.6, 147.8, 146.1, 144.5, 136.3, 130.5, 128.3, 128.1, 124.3.

**3-(4-nitrophenyl)thiophene (1o)**<sup>[15]</sup>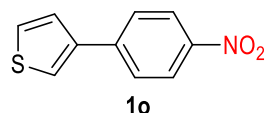

Purified by flash column chromatography on silica gel (petroleum ether/ethyl acetate = 100/1 to 50/1). White solid, 22% yield, 0.9 g, m.p. 144-146 °C. **<sup>1</sup>H NMR** (400 MHz, CDCl<sub>3</sub>) δ 8.26 (d, *J* = 8.8 Hz, 2H), 7.74 (d, *J* = 8.9 Hz, 2H), 7.63 (dd, *J* = 2.9, 1.5 Hz, 1H), 7.48 – 7.43 (m, 2H). **<sup>13</sup>C NMR** (101 MHz, CDCl<sub>3</sub>) δ 146.6, 141.9, 139.9, 127.3, 126.8, 126.0, 124.3, 123.2.

**3-(4-nitrophenyl)furan (1p)**<sup>[16]</sup>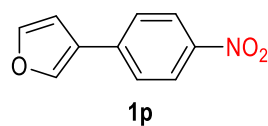

Purified by flash column chromatography on silica gel (petroleum ether/ethyl acetate = 100/1 to 50/1). White solid, 58% yield, 2.2 g, m.p. 119-120 °C. **<sup>1</sup>H NMR** (400 MHz,

CDCl<sub>3</sub>)  $\delta$  8.24 (d,  $J$  = 8.9 Hz, 2H), 7.88 – 7.85 (m, 1H), 7.62 (d,  $J$  = 8.9 Hz, 2H), 7.54 (t,  $J$  = 1.7 Hz, 1H), 6.76 (dd,  $J$  = 1.9, 0.9 Hz, 1H). **<sup>13</sup>C NMR** (101 MHz, CDCl<sub>3</sub>)  $\delta$  146.6, 144.6, 140.3, 139.2, 126.2, 124.9, 124.4, 108.6.

**1-(4-nitrophenyl)naphthalene (1q)**<sup>[15]</sup>

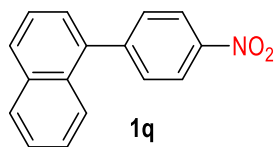

Purified by flash column chromatography on silica gel (petroleum ether/ethyl acetate = 100/1). White solid, 90% yield, 4.5 g, m.p. 128-130 °C. **<sup>1</sup>H NMR** (400 MHz, CDCl<sub>3</sub>)  $\delta$  8.36 (d,  $J$  = 8.8 Hz, 2H), 7.94 (dd,  $J$  = 8.2, 2.9 Hz, 2H), 7.79 (d,  $J$  = 8.5 Hz, 1H), 7.68 (d,  $J$  = 8.7 Hz, 2H), 7.59 – 7.53 (m, 2H), 7.53 – 7.47 (m, 1H), 7.47 – 7.41 (m, 1H). **<sup>13</sup>C NMR** (101 MHz, CDCl<sub>3</sub>)  $\delta$  147.7, 147.2, 137.8, 133.8, 130.9, 129.0, 128.6, 127.1, 126.7, 126.2, 125.3, 125.1, 123.6.

**4'-nitro-[1,1'-biphenyl]-4-carbaldehyde (1r)**<sup>[17]</sup>

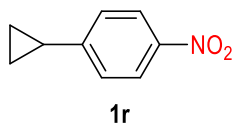

Purified by flash column chromatography on silica gel (petroleum ether/ethyl acetate = 100/1). Light yellow solid, 82% yield, 2.7 g, m.p. 30-31 °C. **<sup>1</sup>H NMR** (400 MHz, CDCl<sub>3</sub>) 8.07 (d,  $J$  = 8.8 Hz, 2H), 7.13 (d,  $J$  = 8.8 Hz, 2H), 1.97 (ddd,  $J$  = 13.3, 8.4, 5.0 Hz, 1H), 1.16 – 1.09 (m, 2H), 0.80 (dt,  $J$  = 6.8, 4.9 Hz, 2H). **<sup>13</sup>C NMR** (101 MHz, CDCl<sub>3</sub>) 152.7, 145.6, 125.8, 123.5, 15.7, 11.0.

## 10.2. Characterization of products

**N-([1,1'-biphenyl]-4-yl)-4-methylbenzenesulfonamide (3a)**<sup>[18]</sup>

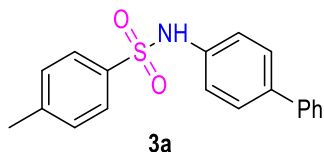

According to general procedure A, the product was purified by flash column chromatography on silica gel (petroleum ether/ethyl acetate = 10/1). White solid, 64% yield, 20.7 mg, m.p. 154-155 °C. **<sup>1</sup>H NMR** (400 MHz, CDCl<sub>3</sub>)  $\delta$  7.71 (d,  $J$  = 8.4 Hz,

2H), 7.55 – 7.50 (m, 2H), 7.47 (d,  $J = 8.6$  Hz, 2H), 7.41 (t,  $J = 7.5$  Hz, 2H), 7.36 – 7.29 (m, 1H), 7.24 (d,  $J = 8.1$  Hz, 2H), 7.15 (d,  $J = 8.6$  Hz, 2H), 6.88 (s, 1H), 2.38 (s, 3H). **<sup>13</sup>C NMR** (101 MHz, CDCl<sub>3</sub>)  $\delta$  144.0, 140.0, 138.2, 136.1, 135.7, 129.7, 128.8, 127.9, 127.33, 127.29, 126.8, 121.8, 21.5. **HRMS** (ESI-TOF,  $m/z$ ): Mass calcd. for C<sub>19</sub>H<sub>16</sub>NO<sub>2</sub>S<sup>-</sup> [M - H]<sup>-</sup> 322.0907, found: 322.0910.

***N*-(4'-(*tert*-butyl)-[1,1'-biphenyl]-4-yl)-4-methylbenzenesulfonamide (3b)**

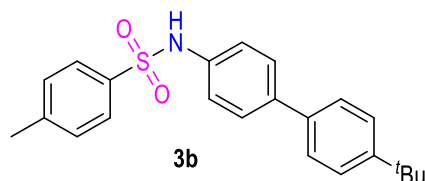

According to general procedure A, the product was purified by flash column chromatography on silica gel (petroleum ether/ethyl acetate = 10/1). White solid, 54% yield, 20.5 mg, m.p. 185-187 °C. **<sup>1</sup>H NMR** (400 MHz, CDCl<sub>3</sub>)  $\delta$  7.69 (d,  $J = 8.4$  Hz, 2H), 7.47 (s, 2H), 7.46 – 7.43 (m, 4H), 7.23 (d,  $J = 8.1$  Hz, 2H), 7.12 (d,  $J = 8.5$  Hz, 2H), 6.80 (s, 1H), 2.38 (s, 3H), 1.34 (s, 9H). **<sup>13</sup>C NMR** (101 MHz, CDCl<sub>3</sub>)  $\delta$  150.4, 143.9, 138.1, 137.1, 136.1, 135.4, 129.7, 127.7, 127.3, 126.4, 125.8, 122.0, 34.5, 31.3, 21.5. **HRMS** (ESI-TOF,  $m/z$ ): Mass calcd. for C<sub>23</sub>H<sub>24</sub>NO<sub>2</sub>S<sup>-</sup> [M - H]<sup>-</sup> 378.1533; found 378.1540.

***N*-(4'-methoxy-[1,1'-biphenyl]-4-yl)-4-methylbenzenesulfonamide (3c)<sup>[19]</sup>**

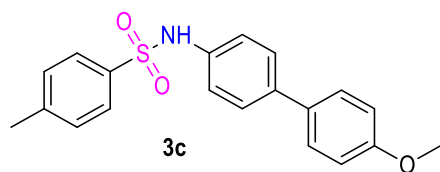

According to general procedure A, the product was purified by flash column chromatography on silica gel (petroleum ether/ethyl acetate = 10/1 to 8/1). White solid, 44% yield, 15.5 mg, m.p. 190-192 °C. **<sup>1</sup>H NMR** (400 MHz, CDCl<sub>3</sub>)  $\delta$  7.68 (d,  $J = 8.3$  Hz, 2H), 7.43 (dd,  $J = 11.9, 8.7$  Hz, 4H), 7.23 (d,  $J = 7.7$  Hz, 2H), 7.11 (d,  $J = 8.6$  Hz, 2H), 6.95 (d,  $J = 8.8$  Hz, 2H), 6.72 (s, 1H), 3.84 (s, 3H), 2.38 (s, 3H). **<sup>13</sup>C NMR** (101 MHz, CDCl<sub>3</sub>)  $\delta$  159.2, 143.9, 138.0, 136.1, 135.1, 132.6, 129.7, 127.8, 127.4, 127.3, 122.1, 114.2, 55.3, 21.5. **HRMS** (ESI-TOF,  $m/z$ ): Mass calcd. for C<sub>20</sub>H<sub>18</sub>NO<sub>3</sub>S<sup>-</sup> [M - H]<sup>-</sup> 352.1013; found 352.1019.

**4-methyl-*N*-(3'-(trifluoromethyl)-[1,1'-biphenyl]-4-yl)benzenesulfonamide(3d)**

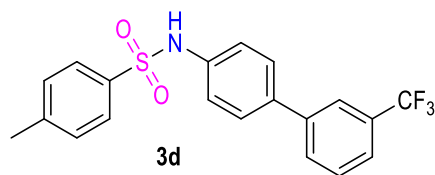

According to general procedure A, the product was purified by flash column chromatography on silica gel (petroleum ether/ethyl acetate = 10/1). White solid, 78% yield, 30.5 mg, m.p. 113-115 °C. **<sup>1</sup>H NMR** (400 MHz, CDCl<sub>3</sub>)  $\delta$  7.73 (d,  $J$  = 8.4 Hz, 3H), 7.68 (d,  $J$  = 7.6 Hz, 1H), 7.57 (d,  $J$  = 7.9 Hz, 1H), 7.53 (d,  $J$  = 7.7 Hz, 1H), 7.47 (d,  $J$  = 8.5 Hz, 2H), 7.25 (d,  $J$  = 7.3 Hz, 2H), 7.19 (d,  $J$  = 8.6 Hz, 2H), 7.09 (s, 1H), 2.38 (s, 3H). **<sup>13</sup>C NMR** (101 MHz, CDCl<sub>3</sub>)  $\delta$  144.1, 140.9, 136.6, 136.5, 136.1, 131.2 (q,  $J$  = 32.2 Hz), 130.1, 129.8, 129.3, 128.0, 127.3, 124.2 (q,  $J$  = 272.7 Hz), 124.0 (q,  $J$  = 3.8 Hz), 123.6 (q,  $J$  = 4.0 Hz), 121.7, 21.5. **<sup>19</sup>F NMR** (376 MHz, CDCl<sub>3</sub>)  $\delta$  -62.6. **HRMS** (ESI-TOF,  $m/z$ ): Mass calcd. for C<sub>20</sub>H<sub>15</sub>F<sub>3</sub>NO<sub>2</sub>S<sup>-</sup> [M - H]<sup>-</sup> 390.0781; found 390.0792.

***N*-(4'-cyano-[1,1'-biphenyl]-4-yl)-4-methylbenzenesulfonamide (3e)<sup>[19]</sup>**

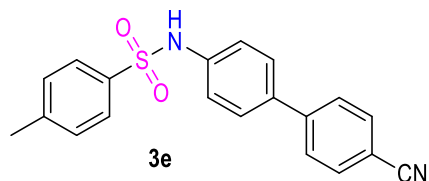

According to general procedure A, the product was purified by flash column chromatography on silica gel (petroleum ether/ethyl acetate = 10/1 to 8/1). White solid, 52% yield, 18.1 mg, m.p. 190-191 °C. **<sup>1</sup>H NMR** (400 MHz, CDCl<sub>3</sub>)  $\delta$  7.73 (d,  $J$  = 8.3 Hz, 2H), 7.69 (d,  $J$  = 8.5 Hz, 2H), 7.60 (d,  $J$  = 8.5 Hz, 2H), 7.47 (d,  $J$  = 8.6 Hz, 2H), 7.26 (d,  $J$  = 8.1 Hz, 2H), 7.19 (d,  $J$  = 8.6 Hz, 2H), 7.05 (s, 1H), 2.38 (s, 3H). **<sup>13</sup>C NMR** (101 MHz, CDCl<sub>3</sub>)  $\delta$  144.5, 144.2, 137.2, 136.0, 135.7, 132.6, 129.8, 128.2, 127.33, 127.25, 121.4, 118.8, 110.9, 21.6. **HRMS** (ESI-TOF,  $m/z$ ): Mass calcd. for C<sub>20</sub>H<sub>15</sub>N<sub>2</sub>O<sub>2</sub>S<sup>-</sup> [M - H]<sup>-</sup> 347.0860; found 347.0870.

***N*-(2'-fluoro-[1,1'-biphenyl]-4-yl)-4-methylbenzenesulfonamide (3f)**

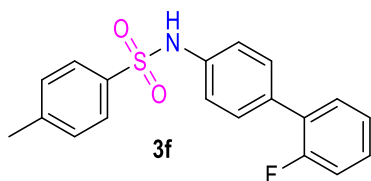

According to general procedure A, the product was purified by flash column chromatography on silica gel (petroleum ether/ethyl acetate = 10/1). White solid, 67% yield, 22.9 mg, m.p. 147-148 °C. **<sup>1</sup>H NMR** (400 MHz, CDCl<sub>3</sub>)  $\delta$  7.74 (d,  $J$  = 8.4 Hz, 2H), 7.46 (dd,  $J$  = 8.6, 1.7 Hz, 2H), 7.39 (td,  $J$  = 7.8, 1.9 Hz, 1H), 7.35 – 7.27 (m, 3H), 7.24 – 7.19 (m, 1H), 7.19 – 7.13 (m, 3H), 6.90 (s, 1H), 2.41 (s, 3H). **<sup>13</sup>C NMR** (101 MHz, CDCl<sub>3</sub>)  $\delta$  159.7 (d,  $J$  = 247.8 Hz), 144.1, 136.1 (d,  $J$  = 10.0 Hz), 132.7, 130.5 (d,  $J$  = 3.6 Hz), 130.0 (d,  $J$  = 3.4 Hz), 129.8, 129.1 (d,  $J$  = 8.6 Hz), 128.1, 128.0, 127.3, 124.4 (d,  $J$  = 3.6 Hz), 121.1, 116.2 (d,  $J$  = 22.6 Hz), 21.6. **<sup>19</sup>F NMR** (376 MHz, CDCl<sub>3</sub>)  $\delta$  -118.05. **HRMS** (ESI-TOF,  $m/z$ ): Mass calcd. for C<sub>19</sub>H<sub>15</sub>FNO<sub>2</sub>S<sup>-</sup> [M - H]<sup>-</sup> 340.0813; found 340.0819.

***N*-(2'-bromo-[1,1'-biphenyl]-4-yl)-4-methylbenzenesulfonamide (3g)**

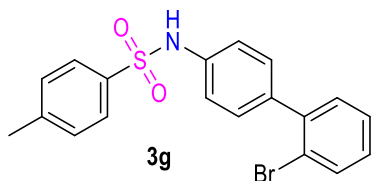

According to general procedure A, the product was purified by flash column chromatography on silica gel (petroleum ether/ethyl acetate = 10/1). White solid, 57% yield, 22.9 mg, m.p. 131-133 °C. **<sup>1</sup>H NMR** (400 MHz, CDCl<sub>3</sub>)  $\delta$  7.73 (d,  $J$  = 8.5 Hz, 2H), 7.66 (dd,  $J$  = 8.0, 1.2 Hz, 1H), 7.36 (td,  $J$  = 7.4, 1.2 Hz, 1H), 7.31 (d,  $J$  = 8.5 Hz, 2H), 7.28 (d,  $J$  = 5.4 Hz, 3H), 7.21 (td,  $J$  = 7.8, 1.9 Hz, 1H), 7.14 (d,  $J$  = 8.5 Hz, 2H), 6.81 (s, 1H), 2.42 (s, 3H). **<sup>13</sup>C NMR** (101 MHz, CDCl<sub>3</sub>)  $\delta$  144.0, 141.5, 138.0, 136.1, 135.9, 133.2, 131.1, 130.4, 129.7, 128.8, 127.4, 127.3, 122.5, 120.8, 21.6. **HRMS** (ESI-TOF,  $m/z$ ): Mass calcd. for C<sub>19</sub>H<sub>15</sub>BrNO<sub>2</sub>S<sup>-</sup> [M - H]<sup>-</sup> 400.0012; found 400.0004.

***N*-(3'-fluoro-[1,1'-biphenyl]-4-yl)-4-methylbenzenesulfonamide (3h)**

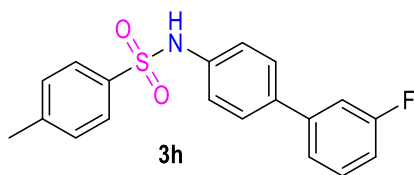

According to general procedure A, the product was purified by flash column chromatography on silica gel (petroleum ether/ethyl acetate = 10/1). White solid, 69% yield, 23.5 mg, m.p. 120-121 °C. **<sup>1</sup>H NMR** (400 MHz, CDCl<sub>3</sub>)  $\delta$  7.74 (d,  $J$  = 8.4 Hz, 2H), 7.47 (d,  $J$  = 8.6 Hz, 2H), 7.39 (td,  $J$  = 7.9, 5.9 Hz, 1H), 7.31 (dt,  $J$  = 7.7, 1.3 Hz, 1H), 7.27 (d,  $J$  = 8.0 Hz, 2H), 7.25 – 7.20 (m, 1H), 7.18 (d,  $J$  = 8.6 Hz, 2H), 7.07 (s, 1H), 7.06 – 7.01 (m, 1H), 2.40 (s, 3H). **<sup>13</sup>C NMR** (101 MHz, CDCl<sub>3</sub>)  $\delta$  163.2 (d,  $J$  = 245.6 Hz), 144.1, 142.4 (d,  $J$  = 7.4 Hz), 136.8 (d,  $J$  = 2.2 Hz), 136.4, 136.1, 130.3 (d,  $J$  = 8.6 Hz), 129.8, 128.0, 127.3, 122.4 (d,  $J$  = 2.8 Hz), 121.6, 114.1 (d,  $J$  = 21.1 Hz), 113.7 (d,  $J$  = 22.4 Hz), 21.6. **<sup>19</sup>F NMR** (376 MHz, CDCl<sub>3</sub>)  $\delta$  -112.93. **HRMS** (ESI-TOF,  $m/z$ ): Mass calcd. for C<sub>19</sub>H<sub>15</sub>FO<sub>2</sub>S<sup>-</sup> [M - H]<sup>-</sup> 340.0813; found 340.0823.

***N*-(3'-chloro-[1,1'-biphenyl]-4-yl)-4-methylbenzenesulfonamide (3i)**

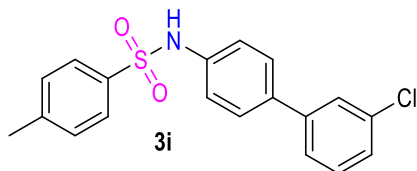

According to general procedure A, the product was purified by flash column chromatography on silica gel (petroleum ether/ethyl acetate = 10/1). White solid, 55% yield, 19.6 mg, m.p. 50-52 °C. **<sup>1</sup>H NMR** (400 MHz, CDCl<sub>3</sub>)  $\delta$  7.76 (d,  $J$  = 8.4 Hz, 2H), 7.50 (t,  $J$  = 1.9 Hz, 1H), 7.47 – 7.42 (m, 2H), 7.40 (dt,  $J$  = 7.5, 1.7 Hz, 1H), 7.35 (t,  $J$  = 7.6 Hz, 1H), 7.31 (dt,  $J$  = 7.7, 1.8 Hz, 1H), 7.28 (d,  $J$  = 1.8 Hz, 2H), 7.26 (s, 1H), 7.22 – 7.17 (m, 2H), 2.40 (s, 3H). **<sup>13</sup>C NMR** (101 MHz, CDCl<sub>3</sub>)  $\delta$  144.1, 141.9, 136.6, 136.4, 136.0, 134.7, 130.1, 129.8, 128.0, 127.3, 127.0, 125.0, 121.5, 21.6. **HRMS** (ESI-TOF,  $m/z$ ): Mass calcd. for C<sub>19</sub>H<sub>16</sub>ClNO<sub>2</sub>SN<sup>+</sup> [M + Na]<sup>+</sup> 380.0482; found 380.0479.

***N*-(4'-fluoro-[1,1'-biphenyl]-4-yl)-4-methylbenzenesulfonamide (3j)**

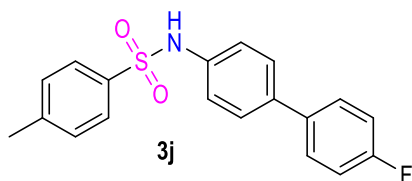

According to general procedure A, the product was purified by flash column chromatography on silica gel (petroleum ether/ethyl acetate = 10/1). White solid, 61% yield, 20.8 mg, m.p. 138-140 °C. **<sup>1</sup>H NMR** (400 MHz, CDCl<sub>3</sub>)  $\delta$  7.72 (d,  $J$  = 8.3 Hz, 2H), 7.53 – 7.46 (m, 2H), 7.43 (d,  $J$  = 8.5 Hz, 2H), 7.27 (d,  $J$  = 8.1 Hz, 2H), 7.16 (d,  $J$  = 8.5 Hz, 2H), 7.12 (t,  $J$  = 8.7 Hz, 2H), 6.87 (s, 1H), 2.41 (s, 3H). **<sup>13</sup>C NMR** (101 MHz, CDCl<sub>3</sub>)  $\delta$  162.5 (d,  $J$  = 246.5 Hz), 144.0, 137.3, 136.2 (d,  $J$  = 3.2 Hz), 136.1, 135.8, 129.8, 128.4 (d,  $J$  = 8.0 Hz), 127.8, 127.3, 121.9, 115.7 (d,  $J$  = 21.7 Hz), 21.6. **<sup>19</sup>F NMR** (376 MHz, CDCl<sub>3</sub>)  $\delta$  -115.5. **HRMS** (ESI-TOF,  $m/z$ ): Mass calcd. for C<sub>19</sub>H<sub>15</sub>FO<sub>2</sub>S<sup>-</sup> [M - H]<sup>-</sup> 340.0813; found 340.0823.

***N*-(4'-bromo-[1,1'-biphenyl]-4-yl)-4-methylbenzenesulfonamide (3k)**

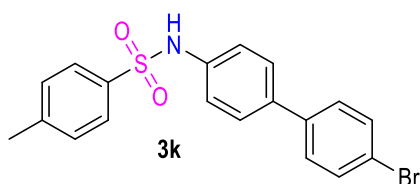

According to general procedure A, the product was purified by flash column chromatography on silica gel (petroleum ether/ethyl acetate = 10/1). White solid, 70% yield, 28.1 mg, m.p. 170-172 °C. **<sup>1</sup>H NMR** (400 MHz, CDCl<sub>3</sub>)  $\delta$  7.70 (d,  $J$  = 8.3 Hz, 2H), 7.52 (d,  $J$  = 8.5 Hz, 2H), 7.42 (d,  $J$  = 8.6 Hz, 2H), 7.37 (d,  $J$  = 8.6 Hz, 2H), 7.24 (d,  $J$  = 8.0 Hz, 2H), 7.14 (d,  $J$  = 8.6 Hz, 2H), 6.92 (s, 1H), 2.38 (s, 3H). **<sup>13</sup>C NMR** (101 MHz, CDCl<sub>3</sub>)  $\delta$  144.0, 139.0, 136.9, 136.1, 136.0, 131.9, 129.7, 128.4, 127.8, 127.3, 121.7, 121.6, 21.5. **HRMS** (ESI-TOF,  $m/z$ ): Mass calcd. for C<sub>19</sub>H<sub>16</sub>BrNO<sub>2</sub>SNa [M + Na]<sup>+</sup> 423.9977; found 423.9969.



**methyl 4'-((4-methylphenyl)sulfonamido)-[1,1'-biphenyl]-4-carboxylate (3l)**

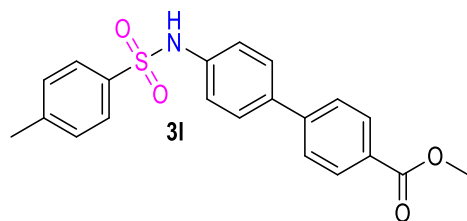

According to general procedure A, the product was purified by flash column chromatography on silica gel (petroleum ether/ethyl acetate = 10/1 to 8/1). White solid, 54% yield, 20.6 mg, m.p. 160-162 °C. **<sup>1</sup>H NMR** (400 MHz, CDCl<sub>3</sub>)  $\delta$  8.09 (d,  $J$  = 8.4 Hz, 2H), 7.74 (d,  $J$  = 8.3 Hz, 2H), 7.60 (d,  $J$  = 8.3 Hz, 2H), 7.53 (d,  $J$  = 8.6 Hz, 2H), 7.28 (d,  $J$  = 2.7 Hz, 2H), 7.20 (d,  $J$  = 8.6 Hz, 2H), 7.05 (s, 1H), 3.96 (s, 3H), 2.40 (s, 3H). **<sup>13</sup>C NMR** (101 MHz, CDCl<sub>3</sub>)  $\delta$  167.0, 144.5, 144.1, 136.8, 136.7, 136.1, 130.2, 129.8, 128.9, 128.2, 127.3, 126.7, 121.6, 52.2, 21.6. **HRMS** (ESI-TOF,  $m/z$ ): Mass calcd. for C<sub>21</sub>H<sub>18</sub>NO<sub>4</sub>S<sup>-</sup> [M - H]<sup>-</sup> 380.0962; found 380.0969.

**4-methyl-N-(3'-(methylthio)-[1,1'-biphenyl]-4-yl)benzenesulfonamide (3m)**

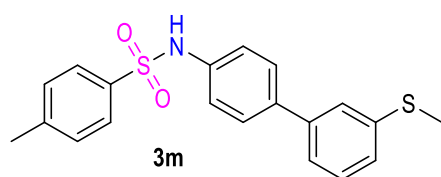

According to general procedure A, the product was purified by flash column chromatography on silica gel (petroleum ether/ethyl acetate = 10/1 to 8/1). Yellow solid, 37% yield, 13.7 mg, m.p. 112-115 °C. **<sup>1</sup>H NMR** (400 MHz, CDCl<sub>3</sub>)  $\delta$  7.69 (d,  $J$  = 8.4 Hz, 2H), 7.44 (d,  $J$  = 8.6 Hz, 2H), 7.38 (t,  $J$  = 1.8 Hz, 1H), 7.32 (d,  $J$  = 7.6 Hz, 1H), 7.28 (t,  $J$  = 1.5 Hz, 1H), 7.26 – 7.23 (m, 2H), 7.21 (dt,  $J$  = 7.7, 1.6 Hz, 1H), 7.13 (d,  $J$  = 8.5 Hz, 2H), 6.76 (s, 1H), 2.51 (s, 3H), 2.38 (s, 3H). **<sup>13</sup>C NMR** (101 MHz, CDCl<sub>3</sub>)  $\delta$  144.0, 140.8, 139.1, 137.8, 136.1, 136.0, 129.8, 129.3, 128.0, 127.3, 125.4, 125.0, 123.7, 121.8, 21.6, 15.9. **HRMS** (ESI-TOF,  $m/z$ ): Mass calcd. for C<sub>20</sub>H<sub>18</sub>NO<sub>2</sub>S<sub>2</sub><sup>-</sup> [M - H]<sup>-</sup> 368.0784; found 368.0794.

***N*-(4'-acetyl-[1,1'-biphenyl]-4-yl)-4-methylbenzenesulfonamide (3n)**

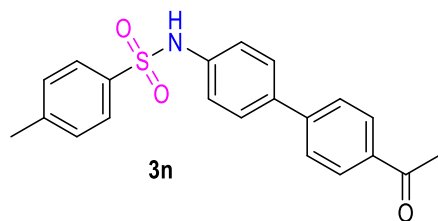

According to general procedure A, the product was purified by flash column chromatography on silica gel (petroleum ether/ethyl acetate = 10/1). White solid, 45% yield, 16.4 mg, m.p. 206-207 °C. **<sup>1</sup>H NMR** (400 MHz, CDCl<sub>3</sub>)  $\delta$  8.02 (d,  $J$  = 8.5 Hz, 2H), 7.74 (d,  $J$  = 8.3 Hz, 2H), 7.63 (d,  $J$  = 8.4 Hz, 2H), 7.54 (d,  $J$  = 8.6 Hz, 2H), 7.28 (d,  $J$  = 8.5 Hz, 2H), 7.20 (d,  $J$  = 8.6 Hz, 2H), 6.93 (s, 1H), 2.65 (s, 3H), 2.41 (s, 3H). **<sup>13</sup>C NMR** (101 MHz, CDCl<sub>3</sub>)  $\delta$  197.8, 144.6, 144.1, 136.8, 136.6, 136.1, 135.9, 129.8, 129.0, 128.2, 127.3, 126.9, 121.5, 26.7, 21.6. **HRMS** (ESI-TOF,  $m/z$ ): Mass calcd. for C<sub>21</sub>H<sub>18</sub>NO<sub>3</sub>S<sup>-</sup> [M - H]<sup>-</sup> 364.1013; found 364.1026.

***N*-(4'-formyl-[1,1'-biphenyl]-4-yl)-4-methylbenzenesulfonamide (3o)**

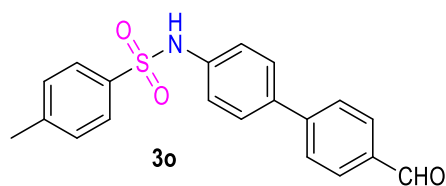

According to general procedure A, the product was purified by flash column chromatography on silica gel (petroleum ether/ethyl acetate = 10/1). Yellow solid, 47% yield, 16.5 mg, m.p. 131-133 °C. **<sup>1</sup>H NMR** (400 MHz, CDCl<sub>3</sub>)  $\delta$  10.04 (s, 1H), 7.92 (d,  $J$  = 8.3 Hz, 2H), 7.72 (d,  $J$  = 8.4 Hz, 2H), 7.68 (d,  $J$  = 8.3 Hz, 2H), 7.52 (d,  $J$  = 8.6 Hz, 2H), 7.26 (d,  $J$  = 8.1 Hz, 2H), 7.19 (d,  $J$  = 8.6 Hz, 2H), 6.96 (s, 1H), 2.38 (s, 3H). **<sup>13</sup>C NMR** (101 MHz, CDCl<sub>3</sub>)  $\delta$  191.9, 146.0, 144.1, 137.0, 136.3, 136.1, 135.2, 130.3, 129.8, 128.3, 127.28, 127.26, 121.4, 21.5. **HRMS** (ESI-TOF,  $m/z$ ): Mass calcd. for C<sub>20</sub>H<sub>16</sub>NO<sub>3</sub>S<sup>-</sup> [M - H]<sup>-</sup> 350.0856; found 350.0867.

***N*-(4'-hydroxy-[1,1'-biphenyl]-4-yl)-4-methylbenzenesulfonamide (3p)**

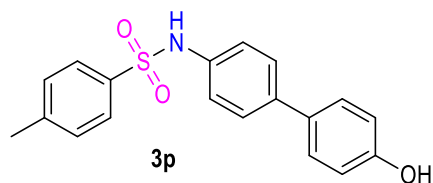

According to general procedure A, the product was purified by flash column chromatography on silica gel (petroleum ether/ethyl acetate = 10/1 to 1/1). White solid, 43% yield, 14.6 mg, m.p. 259-260 °C. **<sup>1</sup>H NMR** (400 MHz, CDCl<sub>3</sub>)  $\delta$  7.67 (d,  $J$  = 8.4 Hz, 2H), 7.41 (d,  $J$  = 3.3 Hz, 2H), 7.39 (d,  $J$  = 3.4 Hz, 2H), 7.23 (d,  $J$  = 8.1 Hz, 2H), 7.09 (d,  $J$  = 8.5 Hz, 2H), 6.88 (d,  $J$  = 8.6 Hz, 2H), 6.63 (s, 1H), 2.38 (s, 3H). **<sup>13</sup>C NMR** (101 MHz, CDCl<sub>3</sub>)  $\delta$  155.3, 143.9, 138.0, 136.1, 135.0, 132.7, 129.7, 128.1, 127.4, 127.3, 122.2, 115.7, 21.5. **HRMS** (ESI-TOF,  $m/z$ ): Mass calcd. for C<sub>19</sub>H<sub>16</sub>NO<sub>3</sub>S<sup>-</sup> [M - H]<sup>-</sup> 338.0856; found 338.0864.

**4-methyl-*N*-(4-(thiophen-2-yl)phenyl)benzenesulfonamide (3q)**

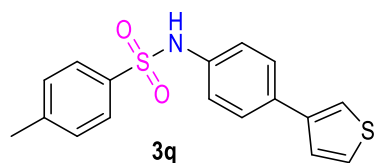

According to general procedure A, the product was purified by flash column chromatography on silica gel (petroleum ether/ethyl acetate = 10/1 to 8/1). White solid, 44% yield, 14.5 mg, m.p. 159-161 °C. **<sup>1</sup>H NMR** (400 MHz, CDCl<sub>3</sub>)  $\delta$  7.67 (d,  $J$  = 8.4 Hz, 2H), 7.47 (d,  $J$  = 8.6 Hz, 2H), 7.39 – 7.35 (m, 2H), 7.31 (dd,  $J$  = 4.8, 1.6 Hz, 1H), 7.23 (d,  $J$  = 7.7 Hz, 2H), 7.09 (d,  $J$  = 8.6 Hz, 2H), 6.72 (s, 1H), 2.37 (s, 3H). **<sup>13</sup>C NMR** (101 MHz, CDCl<sub>3</sub>)  $\delta$  144.0, 141.3, 136.1, 135.4, 133.1, 129.7, 127.31, 127.25, 126.5, 126.0, 122.1, 120.2, 21.6. **HRMS** (ESI-TOF,  $m/z$ ): Mass calcd. for C<sub>17</sub>H<sub>14</sub>NO<sub>2</sub>S<sub>2</sub><sup>-</sup> [M - H]<sup>-</sup> 328.0471; found 328.0478.

***N*-(4-(furan-2-yl)phenyl)-4-methylbenzenesulfonamide (3r)**

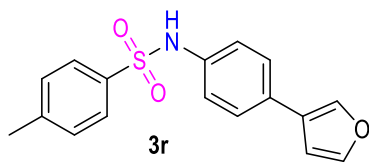

According to general procedure A, the product was purified by flash column chromatography on silica gel (petroleum ether/ethyl acetate = 10/1 to 8/1). White solid, 17% yield, 5.3 mg, m.p. 100-101 °C. **<sup>1</sup>H NMR** (400 MHz, CDCl<sub>3</sub>)  $\delta$  7.67 (s, 1H), 7.65 (d,  $J$  = 8.3 Hz, 2H), 7.45 (t,  $J$  = 1.7 Hz, 1H), 7.35 (d,  $J$  = 8.5 Hz, 2H), 7.23 (d,  $J$  = 8.0 Hz, 2H), 7.06 (d,  $J$  = 8.6 Hz, 2H), 6.63 (dd,  $J$  = 1.9, 0.9 Hz, 1H), 6.50 (s, 1H), 2.38 (s, 3H). **<sup>13</sup>C NMR** (101 MHz, CDCl<sub>3</sub>)  $\delta$  143.9, 143.8, 138.4, 136.1, 135.1, 129.8, 129.7, 127.3, 126.7, 125.6, 122.4, 108.6, 21.5. **HRMS** (ESI-TOF,  $m/z$ ): Mass calcd. for C<sub>17</sub>H<sub>14</sub>NO<sub>3</sub>S<sup>-</sup> [M - H]<sup>-</sup> 312.0700; found 312.0702.

**4-methyl-*N*-(naphthalen-1-yl)benzenesulfonamide (3s)**

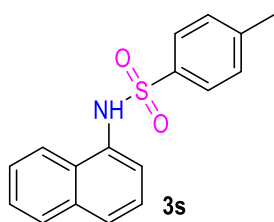

According to general procedure A, the product was purified by flash column chromatography on silica gel (petroleum ether/ethyl acetate = 10/1). White solid, 30% yield, 8.9 mg, m.p. 153-154 °C. **<sup>1</sup>H NMR** (400 MHz, CDCl<sub>3</sub>)  $\delta$  7.82 (t,  $J$  = 9.8 Hz, 2H), 7.71 (dd,  $J$  = 6.5, 2.9 Hz, 1H), 7.63 (d,  $J$  = 8.3 Hz, 2H), 7.49 – 7.39 (m, 2H), 7.37 (q,  $J$  = 4.2, 3.7 Hz, 2H), 7.15 (d,  $J$  = 8.0 Hz, 2H), 6.95 (s, 1H), 2.34 (s, 3H). **<sup>13</sup>C NMR** (101 MHz, CDCl<sub>3</sub>)  $\delta$  143.8, 136.4, 134.3, 131.5, 129.6, 128.9, 128.4, 127.4, 127.2, 126.7, 126.3, 125.5, 122.7, 121.5, 21.5. **HRMS** (ESI-TOF,  $m/z$ ): Mass calcd. for C<sub>17</sub>H<sub>14</sub>NO<sub>2</sub>S<sup>-</sup> [M - H]<sup>-</sup> 320.0716; found 320.0718.

#### 4-methyl-*N*-(4-(naphthalen-1-yl)phenyl)benzenesulfonamide (3t)

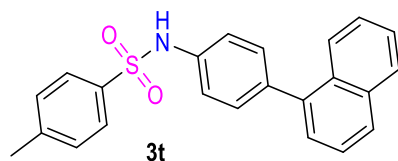

According to general procedure A, the product was purified by flash column chromatography on silica gel (petroleum ether/ethyl acetate = 10/1). Light yellow solid, 51% yield, 19.0 mg, m.p. 142-143 °C. **<sup>1</sup>H NMR** (400 MHz, CDCl<sub>3</sub>)  $\delta$  7.90 (d,  $J$  = 8.0 Hz, 1H), 7.85 (d,  $J$  = 8.3 Hz, 1H), 7.79 (d,  $J$  = 8.5 Hz, 1H), 7.76 (d,  $J$  = 8.4 Hz, 2H), 7.52 – 7.46 (m, 2H), 7.44 – 7.40 (m, 1H), 7.40 – 7.33 (m, 3H), 7.29 (d,  $J$  = 8.0 Hz, 2H), 7.19 (d,  $J$  = 8.5 Hz, 2H), 6.84 (s, 1H), 2.42 (s, 3H). **<sup>13</sup>C NMR** (101 MHz, CDCl<sub>3</sub>)  $\delta$  144.0, 139.2, 137.8, 136.3, 135.7, 133.8, 131.5, 131.0, 129.8, 128.4, 127.8, 127.4, 126.9, 126.1, 125.9, 125.7, 125.4, 121.4, 21.6. **HRMS** (ESI-TOF,  $m/z$ ): Mass calcd. for C<sub>23</sub>H<sub>18</sub>NO<sub>2</sub>S<sup>-</sup> [M - H]<sup>-</sup> 372.1064; found 372.1079.

#### *N*-([1,1'-biphenyl]-3-yl)-4-methylbenzenesulfonamide (3u)

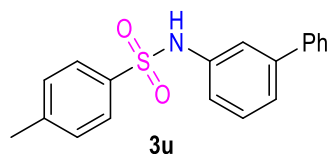

According to general procedure A, the product was purified by flash column chromatography on silica gel (petroleum ether/ethyl acetate = 10/1). White solid, 58% yield, 18.8 mg, m.p. 114-116 °C. **<sup>1</sup>H NMR** (400 MHz, CDCl<sub>3</sub>)  $\delta$  7.69 (d,  $J$  = 8.4 Hz, 2H), 7.50 – 7.46 (m, 2H), 7.42 (t,  $J$  = 7.3 Hz, 2H), 7.37 – 7.32 (m, 2H), 7.31 (d,  $J$  = 7.6 Hz, 1H), 7.28 – 7.27 (m, 1H), 7.25 – 7.21 (m, 2H), 7.06 (ddd,  $J$  = 7.6, 2.2, 1.4 Hz, 1H), 6.77 (s, 1H), 2.37 (s, 3H). **<sup>13</sup>C NMR** (101 MHz, CDCl<sub>3</sub>)  $\delta$  144.0, 142.4, 140.1, 137.0, 136.1, 129.68, 129.67, 128.8, 127.7, 127.3, 127.1, 124.1, 120.3, 120.2, 21.5. **HRMS** (ESI-TOF,  $m/z$ ): Mass calcd. for C<sub>19</sub>H<sub>16</sub>NO<sub>2</sub>S<sup>-</sup> [M - H]<sup>-</sup> 346.0872; found 346.0870.

#### 4-methyl-*N*-phenylbenzenesulfonamide (3v)

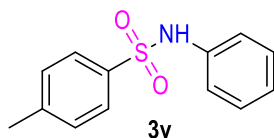

According to general procedure B, the product was purified by flash column chromatography on silica gel (petroleum ether/ethyl acetate = 10/1). White solid, 49% yield, 12.0 mg, m.p. 100-101 °C. **<sup>1</sup>H NMR** (400 MHz, CDCl<sub>3</sub>) δ 7.65 (d, *J* = 8.4 Hz, 2H), 7.23 (d, *J* = 2.8 Hz, 2H), 7.21 (d, *J* = 2.9 Hz, 2H), 7.11 (t, *J* = 7.4 Hz, 1H), 7.06 (d, *J* = 7.3 Hz, 2H), 6.61 (s, 1H), 2.37 (s, 3H). **<sup>13</sup>C NMR** (101 MHz, CDCl<sub>3</sub>) δ 143.9, 136.5, 136.1, 129.6, 129.3, 127.3, 125.4, 121.7, 21.5. **HRMS** (ESI-TOF, *m/z*): Mass calcd. for C<sub>13</sub>H<sub>13</sub>NO<sub>2</sub>SNa<sup>+</sup> [*M* + Na]<sup>+</sup> 270.0565, found: 270.0562.

#### *N*-(4-cyclopropylphenyl)-4-methylbenzenesulfonamide (3w)

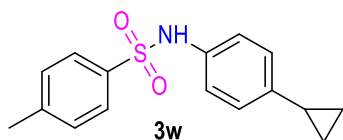

According to general procedure A, the product was purified by flash column chromatography on silica gel (petroleum ether/ethyl acetate = 10/1). White solid, 46% yield, 12.2 mg, m.p. 114-115 °C. **<sup>1</sup>H NMR** (400 MHz, CDCl<sub>3</sub>) δ 7.61 (d, *J* = 8.3 Hz, 2H), 7.21 (d, *J* = 8.1 Hz, 2H), 6.93 (s, 4H), 6.47 (s, 1H), 2.38 (s, 3H), 1.81 (tt, *J* = 8.4, 5.1 Hz, 1H), 0.97 – 0.88 (m, 2H), 0.61 (dt, *J* = 6.6, 4.7 Hz, 2H). **<sup>13</sup>C NMR** (101 MHz, CDCl<sub>3</sub>) δ 143.7, 141.6, 136.1, 133.6, 129.6, 127.3, 126.4, 122.5, 21.5, 14.9, 9.2. **HRMS** (ESI-TOF, *m/z*): Mass calcd. for C<sub>16</sub>H<sub>16</sub>NO<sub>2</sub>S<sup>-</sup> [*M* - H]<sup>-</sup> 286.0907; found 286.0916.

#### *N*-(4-bromophenyl)-4-methylbenzenesulfonamide (3x)

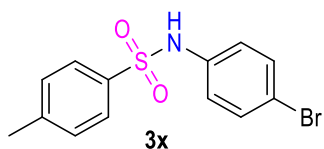

According to general procedure A, the product was purified by flash column chromatography on silica gel (petroleum ether/ethyl acetate = 10/1). Light yellow solid, 47% yield, 14.6 mg, m.p. 154-157 °C. **<sup>1</sup>H NMR** (400 MHz, CDCl<sub>3</sub>) δ 7.65 (d, *J*

= 8.3 Hz, 2H), 7.34 (d,  $J$  = 8.8 Hz, 2H), 7.24 (d,  $J$  = 8.1 Hz, 2H), 6.96 (d,  $J$  = 8.8 Hz, 2H), 6.90 (s, 1H), 2.39 (s, 3H). **<sup>13</sup>C NMR** (101 MHz, CDCl<sub>3</sub>)  $\delta$  144.2, 135.6, 132.4, 129.8, 127.2, 123.1, 122.2, 118.6, 21.6. **HRMS** (ESI-TOF,  $m/z$ ): Mass calcd. for C<sub>13</sub>H<sub>12</sub>BrNO<sub>2</sub>SNa<sup>+</sup> [M + Na]<sup>+</sup> 347.9664; found 347.9655.

***N*-(3-bromophenyl)-4-methylbenzenesulfonamide (3y)**

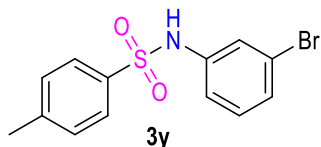

According to general procedure A, the product was purified by flash column chromatography on silica gel (petroleum ether/ethyl acetate = 10/1). Light yellow solid, 52% yield, 16.7 mg, m.p. 122-124 °C. **<sup>1</sup>H NMR** (400 MHz, CDCl<sub>3</sub>)  $\delta$  7.67 (d,  $J$  = 8.3 Hz, 2H), 7.27 (s, 1H), 7.25 – 7.23 (m, 2H), 7.21 (dd,  $J$  = 1.9, 1.1 Hz, 1H), 7.10 (t,  $J$  = 7.9 Hz, 1H), 7.01 (ddd,  $J$  = 8.1, 2.2, 1.1 Hz, 1H), 6.78 (s, 1H), 2.39 (s, 3H). **<sup>13</sup>C NMR** (101 MHz, CDCl<sub>3</sub>)  $\delta$  144.3, 137.9, 135.8, 130.6, 129.8, 128.3, 127.2, 124.0, 122.8, 119.6, 21.6. **HRMS** (ESI-TOF,  $m/z$ ): Mass calcd. for C<sub>13</sub>H<sub>11</sub>BrNO<sub>2</sub>S<sup>-</sup> [M - H]<sup>-</sup> 323.9699; found 323.9688.

***N*-(3,5-dimethylphenyl)-4-methylbenzenesulfonamide (3z)**

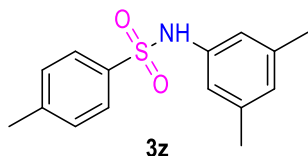

According to general procedure B, the product was purified by flash column chromatography on silica gel (petroleum ether/ethyl acetate = 10/1). White solid, 41% yield, 11.2 mg, m.p. 92-93 °C. **<sup>1</sup>H NMR** (400 MHz, CDCl<sub>3</sub>)  $\delta$  7.72 (d,  $J$  = 8.4 Hz, 2H), 7.25 (d,  $J$  = 8.1 Hz, 2H), 6.94 (s, 1H), 6.74 (s, 1H), 6.72 (s, 2H), 2.40 (s, 3H), 2.23 (s, 6H). **<sup>13</sup>C NMR** (101 MHz, CDCl<sub>3</sub>)  $\delta$  143.7, 139.0, 136.4, 136.3, 129.6, 127.3, 126.9, 118.9, 21.5, 21.2. **HRMS** (ESI-TOF,  $m/z$ ): Mass calcd. for C<sub>15</sub>H<sub>17</sub>NO<sub>2</sub>SNa<sup>+</sup> [M + Na]<sup>+</sup> 298.0878, found: 298.0875.

### *N*-(4-acetylphenyl)-4-methylbenzenesulfonamide (**3aa**)

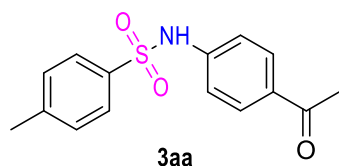

According to general procedure B, the product was purified by flash column chromatography on silica gel (petroleum ether/ethyl acetate = 10/1). White solid, 66% yield, 19.0 mg, m.p. 188-189 °C. **<sup>1</sup>H NMR** (400 MHz, CDCl<sub>3</sub>) δ 7.84 (d, *J* = 8.7 Hz, 2H), 7.73 (d, *J* = 8.4 Hz, 2H), 7.27 (s, 1H), 7.24 (s, 1H), 7.18 (s, 1H), 7.15 (d, *J* = 8.7 Hz, 2H), 2.53 (s, 3H), 2.38 (s, 3H). **<sup>13</sup>C NMR** (101 MHz, CDCl<sub>3</sub>) δ 196.8, 144.5, 141.1, 135.9, 133.3, 130.0, 129.9, 127.3, 119.0, 26.4, 21.6. **HRMS** (ESI-TOF, *m/z*): Mass calcd. for C<sub>15</sub>H<sub>15</sub>NO<sub>3</sub>SNa<sup>+</sup> [*M* + Na]<sup>+</sup> 312.0671, found: 312.0669.

### Methyl-4-((4-methylphenyl)sulfonamido)benzoate (**3ab**)

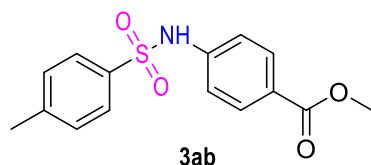

According to general procedure B, the product was purified by flash column chromatography on silica gel (petroleum ether/ethyl acetate = 10/1). White solid, 46% yield, 14.0 mg, m.p. 186-187 °C. **<sup>1</sup>H NMR** (400 MHz, CDCl<sub>3</sub>) δ 7.90 (d, *J* = 8.7 Hz, 2H), 7.72 (d, *J* = 8.4 Hz, 2H), 7.27 (s, 1H), 7.24 (d, *J* = 8.1 Hz, 2H), 7.13 (d, *J* = 8.7 Hz, 2H), 3.87 (s, 3H), 2.37 (s, 3H). **<sup>13</sup>C NMR** (101 MHz, CDCl<sub>3</sub>) δ 166.4, 144.4, 141.0, 135.8, 131.1, 129.9, 127.3, 126.2, 119.0, 52.1, 21.6. **HRMS** (ESI-TOF, *m/z*): Mass calcd. for C<sub>15</sub>H<sub>15</sub>NO<sub>4</sub>SNa<sup>+</sup> [*M* + Na]<sup>+</sup> 328.0620, found: 328.0620.

### *N*-(4-(cyanomethyl)phenyl)-4-methylbenzenesulfonamide (**3ac**)

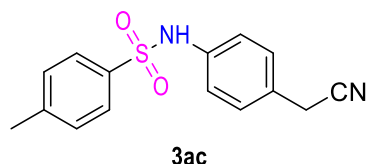

According to general procedure B, the product was purified by flash column chromatography on silica gel (petroleum ether/ethyl acetate = 10/1). White solid, 49%



yield, 14.0 mg, m.p. 193-194 °C. **<sup>1</sup>H NMR** (400 MHz, CDCl<sub>3</sub>) δ 7.67 (d, *J* = 8.4 Hz, 2H), 7.24 (d, *J* = 8.1 Hz, 2H), 7.19 (d, *J* = 8.5 Hz, 2H), 7.09 (d, *J* = 8.6 Hz, 2H), 7.01 (s, 1H), 3.67 (s, 2H), 2.38 (s, 3H). **<sup>13</sup>C NMR** (101 MHz, CDCl<sub>3</sub>) δ 144.1, 136.5, 135.8, 129.8, 128.9, 127.2, 126.6, 121.8, 117.6, 23.0, 21.5. **HRMS** (ESI-TOF, *m/z*): Mass calcd. for C<sub>15</sub>H<sub>15</sub>N<sub>2</sub>O<sub>2</sub>S<sup>+</sup> [*M* + *H*]<sup>+</sup> 287.0849, found: 287.0850.

**4-methyl-*N*-(1-oxo-2,3-dihydro-1H-inden-5-yl)benzenesulfonamide (3ad)**

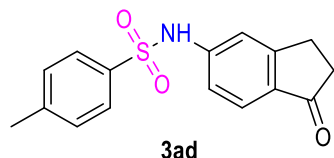

According to general procedure B, the product was purified by flash column chromatography on silica gel (petroleum ether/ethyl acetate = 10/1). White solid, 37% yield, 11.4 mg, m.p. 189-190 °C. **<sup>1</sup>H NMR** (400 MHz, CDCl<sub>3</sub>) δ 7.67 (d, *J* = 8.3 Hz, 2H), 7.52 (dd, *J* = 8.2, 2.2 Hz, 1H), 7.41 (d, *J* = 8.3 Hz, 1H), 7.32 (d, *J* = 2.2 Hz, 1H), 7.24 (d, *J* = 8.1 Hz, 2H), 7.01 (s, 1H), 3.12 – 3.06 (m, 2H), 2.72 – 2.67 (m, 2H), 2.39 (s, 3H). **<sup>13</sup>C NMR** (101 MHz, CDCl<sub>3</sub>) 206.3, 152.1, 144.2, 138.0, 136.3, 135.8, 129.8, 128.7, 127.6, 127.2, 116.0, 36.7, 25.4, 21.6. **HRMS** (ESI-TOF, *m/z*): Mass calcd. for C<sub>16</sub>H<sub>16</sub>NO<sub>3</sub>S<sup>+</sup> [*M* + *H*]<sup>+</sup> 302.0851, found: 302.0851.

***N*-([1,1'-biphenyl]-4-yl)-4-methoxybenzenesulfonamide (3ae)**

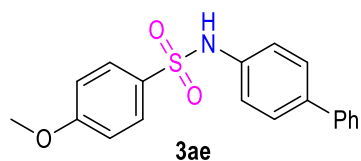

According to general procedure A, the product was purified by flash column chromatography on silica gel (petroleum ether/ethyl acetate = 10/1 to 8/1). White solid, 65% yield, 22.1 mg, m.p. 153-155 °C. **<sup>1</sup>H NMR** (400 MHz, CDCl<sub>3</sub>) δ 7.78 (d, *J* = 9.0 Hz, 2H), 7.51 (d, *J* = 7.0 Hz, 2H), 7.47 (d, *J* = 8.6 Hz, 2H), 7.41 (t, *J* = 7.5 Hz, 2H), 7.35 – 7.30 (m, 1H), 7.18 (s, 1H), 7.16 (d, *J* = 8.6 Hz, 2H), 6.90 (d, *J* = 8.9 Hz, 2H), 3.81 (s, 3H). **<sup>13</sup>C NMR** (101 MHz, CDCl<sub>3</sub>) δ 163.1, 140.0, 138.0, 135.8, 130.5, 129.4, 128.8, 127.9, 127.3, 126.8, 121.7, 114.2, 55.5. **HRMS** (ESI-TOF, *m/z*): Mass calcd. for C<sub>19</sub>H<sub>17</sub>NO<sub>3</sub>SN<sup>+</sup> [*M* + *Na*]<sup>+</sup> 362.0821; found 362.0814.

***N*-([1,1'-biphenyl]-4-yl)-4-(*tert*-butyl)benzenesulfonamide (3af)**

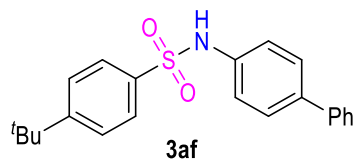

According to general procedure A, the product was purified by flash column chromatography on silica gel (petroleum ether/ethyl acetate = 10/1). White solid, 42% yield, 15.4 mg, m.p. 117-119 °C. **<sup>1</sup>H NMR** (400 MHz, CDCl<sub>3</sub>)  $\delta$  7.77 (d,  $J$  = 8.6 Hz, 2H), 7.52 (d,  $J$  = 7.0 Hz, 2H), 7.50 – 7.44 (m, 4H), 7.41 (t,  $J$  = 7.7 Hz, 2H), 7.35 – 7.30 (m, 1H), 7.18 (d,  $J$  = 8.6 Hz, 2H), 7.11 (s, 1H), 1.30 (s, 9H). **<sup>13</sup>C NMR** (101 MHz, CDCl<sub>3</sub>)  $\delta$  156.9, 140.0, 138.0, 136.1, 135.8, 128.8, 127.9, 127.3, 127.1, 126.8, 126.1, 121.5, 35.1, 31.0. **HRMS** (ESI-TOF,  $m/z$ ): Mass calcd. for C<sub>22</sub>H<sub>22</sub>NO<sub>2</sub>S<sup>-</sup> [M - H]<sup>-</sup> 364.1377; found 364.1387.

***N*-([1,1'-biphenyl]-4-yl)-4-fluorobenzenesulfonamide (3ag)**

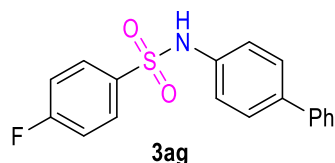

According to general procedure A, the product was purified by flash column chromatography on silica gel (petroleum ether/ethyl acetate = 10/1). White solid, 65% yield, 21.3 mg, m.p. 175-178 °C. **<sup>1</sup>H NMR** (400 MHz, CDCl<sub>3</sub>)  $\delta$  7.84 (dd,  $J$  = 8.9, 5.0 Hz, 2H), 7.55 (d,  $J$  = 7.0 Hz, 2H), 7.51 (d,  $J$  = 8.6 Hz, 2H), 7.45 (t,  $J$  = 7.5 Hz, 2H), 7.39 – 7.34 (m, 1H), 7.15 (t,  $J$  = 8.6 Hz, 4H), 6.81 (s, 1H). **<sup>13</sup>C NMR** (101 MHz, CDCl<sub>3</sub>)  $\delta$  165.3 (d,  $J$  = 255.3 Hz), 139.9, 138.8, 135.2, 135.0 (d,  $J$  = 3.4 Hz), 130.1 (d,  $J$  = 9.5 Hz), 128.9, 128.1, 127.5, 126.9, 122.3, 116.4 (d,  $J$  = 22.6 Hz). **<sup>19</sup>F NMR** (376 MHz, CDCl<sub>3</sub>)  $\delta$  -104.2. **HRMS** (ESI-TOF,  $m/z$ ): Mass calcd. for C<sub>18</sub>H<sub>14</sub>FNO<sub>2</sub>SN<sup>+</sup> [M + Na]<sup>+</sup> 350.0621; found 350.0621.

***N*-([1,1'-biphenyl]-4-yl)-4-chlorobenzenesulfonamide (3ah)**

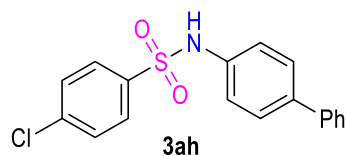

According to general procedure A, the product was purified by flash column chromatography on silica gel (petroleum ether/ethyl acetate = 10/1). White solid, 60% yield, 20.6 mg, m.p. 180-182 °C. **<sup>1</sup>H NMR** (400 MHz, CDCl<sub>3</sub>)  $\delta$  7.75 (d,  $J$  = 8.7 Hz, 2H), 7.52 (d,  $J$  = 7.0 Hz, 2H), 7.49 (d,  $J$  = 8.6 Hz, 2H), 7.45 – 7.39 (m, 4H), 7.38 – 7.31 (m, 1H), 7.15 (d,  $J$  = 8.6 Hz, 2H), 6.97 (s, 1H). **<sup>13</sup>C NMR** (101 MHz, CDCl<sub>3</sub>)  $\delta$  139.8, 139.7, 138.8, 137.4, 135.1, 129.4, 128.8, 128.7, 128.1, 127.5, 126.8, 122.3. **HRMS** (ESI-TOF,  $m/z$ ): Mass calcd. for C<sub>18</sub>H<sub>13</sub>ClNO<sub>2</sub>S<sup>−</sup> [M - H]<sup>−</sup> 342.0361; found 342.0373.

***N*-([1,1'-biphenyl]-4-yl)-4-(trifluoromethyl)benzenesulfonamide (3ai)**

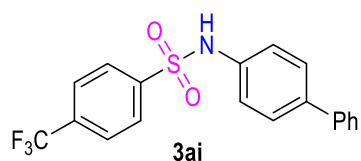

According to general procedure A, the product was purified by flash column chromatography on silica gel (petroleum ether/ethyl acetate = 10/1). White solid, 40% yield, 15.1 mg, m.p. 177-178 °C. **<sup>1</sup>H NMR** (400 MHz, CDCl<sub>3</sub>)  $\delta$  7.93 (d,  $J$  = 8.2 Hz, 2H), 7.73 (d,  $J$  = 8.3 Hz, 2H), 7.55 – 7.48 (m, 4H), 7.46 – 7.39 (m, 2H), 7.37 – 7.31 (m, 1H), 7.16 (d,  $J$  = 8.6 Hz, 2H), 6.98 (s, 1H). **<sup>13</sup>C NMR** (101 MHz, CDCl<sub>3</sub>)  $\delta$  142.7, 139.8, 139.1, 134.9, 134.8 (q,  $J$  = 33.2 Hz), 128.9, 128.2, 127.8, 127.6, 126.9, 126.3 (q,  $J$  = 3.7 Hz), 123.2 (q,  $J$  = 272.7 Hz), 122.5. **<sup>19</sup>F NMR** (376 MHz, CDCl<sub>3</sub>)  $\delta$  -63.2. **HRMS** (ESI-TOF,  $m/z$ ): Mass calcd. for C<sub>19</sub>H<sub>13</sub>F<sub>3</sub>NO<sub>2</sub>S<sup>−</sup> [M - H]<sup>−</sup> 376.0624; found 376.0626.

***N*-([1,1'-biphenyl]-4-yl)-3-methylbenzenesulfonamide (3aj)**

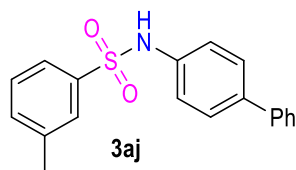

According to general procedure A, the product was purified by flash column chromatography on silica gel (petroleum ether/ethyl acetate = 10/1). White solid, 70% yield, 22.6 mg, m.p. 118-119 °C. **<sup>1</sup>H NMR** (400 MHz, CDCl<sub>3</sub>)  $\delta$  7.66 (s, 1H), 7.65 – 7.61 (m, 1H), 7.54 – 7.50 (m, 2H), 7.47 (d,  $J$  = 8.6 Hz, 2H), 7.41 (t,  $J$  = 7.5 Hz, 2H), 7.35 (d,  $J$  = 1.2 Hz, 2H), 7.32 (dd,  $J$  = 7.5, 1.5 Hz, 1H), 7.16 (d,  $J$  = 8.5 Hz, 2H), 7.06 (s, 1H), 2.36 (s, 3H). **<sup>13</sup>C NMR** (101 MHz, CDCl<sub>3</sub>)  $\delta$  140.0, 139.3, 138.8, 138.2, 135.7, 133.9, 128.9, 128.8, 127.9, 127.6, 127.3, 126.8, 124.4, 121.8, 21.3. **HRMS** (ESI-TOF,  $m/z$ ): Mass calcd. for C<sub>19</sub>H<sub>17</sub>NO<sub>2</sub>SNa<sup>+</sup> [M + Na]<sup>+</sup> 346.0872; found 346.0870.

***N*-([1,1'-biphenyl]-4-yl)-3-methoxybenzenesulfonamide (3ak)**

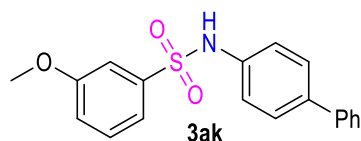

According to general procedure A, the product was purified by flash column chromatography on silica gel (petroleum ether/ethyl acetate = 10/1 to 8/1). White solid, 48% yield, 16.3 mg, m.p. 148-149 °C. **<sup>1</sup>H NMR** (400 MHz, CDCl<sub>3</sub>)  $\delta$  7.54 – 7.50 (m, 2H), 7.48 (d,  $J$  = 8.6 Hz, 2H), 7.42 (dd,  $J$  = 7.7, 6.8 Hz, 3H), 7.38 – 7.32 (m, 2H), 7.30 (dd,  $J$  = 2.6, 1.7 Hz, 1H), 7.17 (d,  $J$  = 8.6 Hz, 2H), 7.06 (ddd,  $J$  = 8.1, 2.6, 1.1 Hz, 1H), 7.01 (s, 1H), 3.75 (s, 3H). **<sup>13</sup>C NMR** (101 MHz, CDCl<sub>3</sub>)  $\delta$  159.8, 140.0, 138.4, 135.6, 130.1, 128.8, 127.9, 127.4, 126.8, 122.1, 119.7, 119.4, 111.6, 55.5. **HRMS** (ESI-TOF,  $m/z$ ): Mass calcd. for C<sub>19</sub>H<sub>17</sub>NO<sub>3</sub>SNa<sup>+</sup> [M + Na]<sup>+</sup> 362.0821; found 362.0817.

***N*-([1,1'-biphenyl]-4-yl)-3-chlorobenzenesulfonamide (3al)**

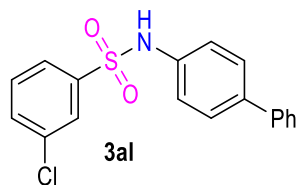

According to general procedure A, the product was purified by flash column chromatography on silica gel (petroleum ether/ethyl acetate = 10/1). White solid, 56% yield, 19.3 mg, m.p. 111-112 °C. **<sup>1</sup>H NMR** (400 MHz, CDCl<sub>3</sub>) δ 7.83 (t, *J* = 1.9 Hz, 1H), 7.68 (dt, *J* = 7.9, 1.4 Hz, 1H), 7.52 (dd, *J* = 9.8, 1.8 Hz, 4H), 7.49 (d, *J* = 2.0 Hz, 1H), 7.45 – 7.39 (m, 3H), 7.37 – 7.31 (m, 1H), 7.16 (d, *J* = 8.5 Hz, 2H), 7.01 (s, 1H). **<sup>13</sup>C NMR** (101 MHz, CDCl<sub>3</sub>) δ 140.6, 139.9, 138.8, 135.3, 135.0, 133.3, 130.4, 128.8, 128.1, 127.5, 127.3, 126.9, 125.3, 122.3. **HRMS** (ESI-TOF, *m/z*): Mass calcd. for C<sub>18</sub>H<sub>13</sub>ClNO<sub>2</sub>S<sup>-</sup> [M - H]<sup>-</sup> 342.0361; found 342.0371.

***N*-([1,1'-biphenyl]-4-yl)-2-methylbenzenesulfonamide (3am)**

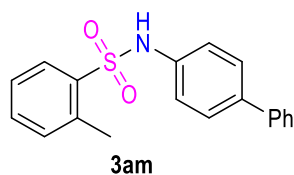

According to general procedure A, the product was purified by flash column chromatography on silica gel (petroleum ether/ethyl acetate = 10/1). White solid, 65% yield, 20.0 mg, m.p. 134-135 °C. **<sup>1</sup>H NMR** (400 MHz, CDCl<sub>3</sub>) δ 8.04 (dd, *J* = 8.2, 1.4 Hz, 1H), 7.50 (d, *J* = 1.6 Hz, 1H), 7.48 (s, 1H), 7.44 (d, *J* = 8.5 Hz, 3H), 7.40 (dd, *J* = 8.4, 6.8 Hz, 2H), 7.32 (ddd, *J* = 7.9, 3.1, 1.6 Hz, 2H), 7.29 (s, 1H), 7.22 (s, 1H), 7.11 (d, *J* = 8.6 Hz, 2H), 2.70 (s, 3H). **<sup>13</sup>C NMR** (101 MHz, CDCl<sub>3</sub>) δ 140.0, 137.8, 137.3, 137.2, 135.6, 133.2, 132.7, 130.0, 128.8, 128.0, 127.3, 126.8, 126.3, 120.7, 20.4. **HRMS** (ESI-TOF, *m/z*): Mass calcd. for C<sub>19</sub>H<sub>17</sub>NO<sub>2</sub>SNa<sup>+</sup> [M + Na]<sup>+</sup> 346.0872; found 346.0868.

***N*-([1,1'-biphenyl]-4-yl)-2-methoxybenzenesulfonamide (3an)**

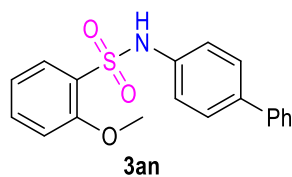

According to general procedure A, the product was purified by flash column chromatography on silica gel (petroleum ether/ethyl acetate = 10/1 to 8/1). White solid, 52% yield, 17.6 mg, m.p. 177-179 °C. **<sup>1</sup>H NMR** (400 MHz, CDCl<sub>3</sub>)  $\delta$  7.87 (dd,  $J$  = 7.7, 1.7 Hz, 1H), 7.50 – 7.45 (m, 3H), 7.43 – 7.36 (m, 4H), 7.35 – 7.27 (m, 2H), 7.16 (d,  $J$  = 8.5 Hz, 2H), 7.03 – 6.97 (m, 2H), 4.06 (s, 3H). **<sup>13</sup>C NMR** (101 MHz, CDCl<sub>3</sub>)  $\delta$  156.2, 140.1, 138.0, 136.0, 135.0, 131.0, 128.7, 127.8, 127.2, 126.7, 126.2, 121.4, 120.7, 112.0, 56.4. **HRMS** (ESI-TOF,  $m/z$ ): Mass calcd. for C<sub>19</sub>H<sub>17</sub>NO<sub>3</sub>SNa<sup>+</sup> [M + Na]<sup>+</sup> 362.0821; found 362.0816.

***N*-([1,1'-biphenyl]-4-yl)-2-fluorobenzenesulfonamide (3ao)**

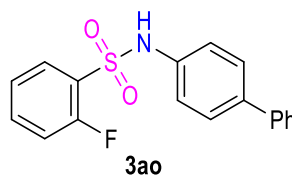

According to general procedure A, the product was purified by flash column chromatography on silica gel (petroleum ether/ethyl acetate = 10/1). White solid, 60% yield, 19.6 mg, m.p. 146-148 °C. **<sup>1</sup>H NMR** (400 MHz, CDCl<sub>3</sub>)  $\delta$  7.89 (td,  $J$  = 7.5, 1.8 Hz, 1H), 7.60 – 7.54 (m, 1H), 7.51 (dd,  $J$  = 8.4, 1.4 Hz, 2H), 7.48 (d,  $J$  = 8.6 Hz, 2H), 7.42 (t,  $J$  = 7.5 Hz, 2H), 7.37 – 7.31 (m, 1H), 7.26 – 7.19 (m, 4H), 7.06 (s, 1H). **<sup>13</sup>C NMR** (101 MHz, CDCl<sub>3</sub>)  $\delta$  158.8 (d,  $J$  = 254.3 Hz), 140.0, 138.6, 135.6 (d,  $J$  = 8.7 Hz), 135.0, 131.1, 128.9, 128.1, 127.5, 126.9, 126.8 (d,  $J$  = 13.7 Hz), 124.7 (d,  $J$  = 3.8 Hz), 121.7, 117.0 (d,  $J$  = 21.0 Hz). **<sup>19</sup>F NMR** (376 MHz, CDCl<sub>3</sub>)  $\delta$  -110.51. **HRMS** (ESI-TOF,  $m/z$ ): Mass calcd. for C<sub>18</sub>H<sub>14</sub>FO<sub>2</sub>SNa<sup>+</sup> [M + Na]<sup>+</sup> 350.0621; found 350.0617.

***N*-([1,1'-biphenyl]-4-yl)naphthalene-1-sulfonamide (3ap)**

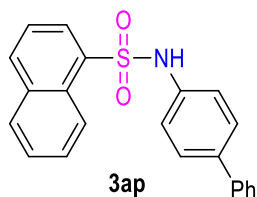

According to general procedure A, the product was purified by flash column chromatography on silica gel (petroleum ether/ethyl acetate = 10/1). White solid, 36% yield, 12.9 mg, m.p. 174-175 °C. **<sup>1</sup>H NMR** (400 MHz, CDCl<sub>3</sub>)  $\delta$  8.73 (d,  $J$  = 8.6 Hz, 1H), 8.24 (dd,  $J$  = 7.4, 1.3 Hz, 1H), 8.04 (d,  $J$  = 8.2 Hz, 1H), 7.94 (d,  $J$  = 8.1 Hz, 1H), 7.69 (ddd,  $J$  = 8.5, 6.9, 1.5 Hz, 1H), 7.64 – 7.58 (m, 1H), 7.48 (d,  $J$  = 7.7 Hz, 1H), 7.46 – 7.41 (m, 2H), 7.40 – 7.33 (m, 4H), 7.32 – 7.27 (m, 1H), 7.01 (s, 2H), 6.99 (s, 1H). **<sup>13</sup>C NMR** (101 MHz, CDCl<sub>3</sub>)  $\delta$  140.0, 138.3, 135.4, 134.7, 134.2, 134.0, 130.4, 129.3, 128.7, 128.6, 128.1, 127.8, 127.3, 126.9, 126.8, 124.13, 124.11, 122.0. **HRMS** (ESI-TOF,  $m/z$ ): Mass calcd. for C<sub>22</sub>H<sub>16</sub>NO<sub>2</sub>S<sup>−</sup> [M - H]<sup>−</sup> 358.0907; found 358.0914.

***N*-([1,1'-biphenyl]-4-yl)thiophene-2-sulfonamide (3aq)**

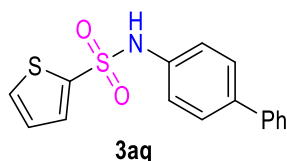

According to general procedure A, the product was purified by flash column chromatography on silica gel (petroleum ether/ethyl acetate = 10/1). White solid, 40% yield, 12.6 mg, m.p. 130-133 °C. **<sup>1</sup>H NMR** (400 MHz, CDCl<sub>3</sub>)  $\delta$  7.57 – 7.53 (m, 3H), 7.53 (s, 2H), 7.51 (s, 1H), 7.43 (t,  $J$  = 7.6 Hz, 2H), 7.37 – 7.31 (m, 1H), 7.21 (d,  $J$  = 8.6 Hz, 2H), 7.02 (dd,  $J$  = 5.0, 3.8 Hz, 1H), 6.88 (s, 1H). **<sup>13</sup>C NMR** (101 MHz, CDCl<sub>3</sub>)  $\delta$  139.9, 139.3, 138.7, 135.2, 133.0, 132.5, 128.8, 128.0, 127.44, 127.36, 126.8, 122.2. **HRMS** (ESI-TOF,  $m/z$ ): Mass calcd. for C<sub>16</sub>H<sub>12</sub>NO<sub>2</sub>S<sub>2</sub><sup>−</sup> [M - H]<sup>−</sup> 314.0315; found 314.0325.

***N*-([1,1'-biphenyl]-4-yl)-2-methylfuran-3-sulfonamide (3ar)**

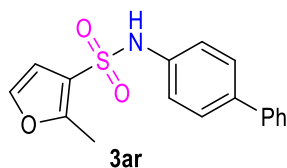

According to general procedure A, the product was purified by flash column chromatography on silica gel (petroleum ether/ethyl acetate = 10/1). Light yellow solid, 39% yield, 12.2 mg, m.p. 85-87 °C. **<sup>1</sup>H NMR** (400 MHz, CDCl<sub>3</sub>)  $\delta$  7.53 (t,  $J$  = 8.6 Hz, 4H), 7.43 (t,  $J$  = 7.5 Hz, 2H), 7.38 – 7.32 (m, 1H), 7.24 (d,  $J$  = 2.1 Hz, 1H), 7.19 (d,  $J$  = 8.6 Hz, 2H), 6.94 (s, 1H), 6.56 (d,  $J$  = 2.1 Hz, 1H), 2.35 (s, 3H). **<sup>13</sup>C NMR** (101 MHz, CDCl<sub>3</sub>)  $\delta$  157.1, 141.1, 140.0, 138.7, 135.4, 128.8, 127.9, 127.4, 126.8, 122.5, 119.9, 109.6, 12.8. **HRMS** (ESI-TOF,  $m/z$ ): Mass calcd. for C<sub>17</sub>H<sub>14</sub>NO<sub>3</sub>S<sup>-</sup> [M - H]<sup>-</sup> 312.0700; found 312.0710.

***N*-([1,1'-biphenyl]-4-yl)-4-aminobenzenesulfonamide (3as)**

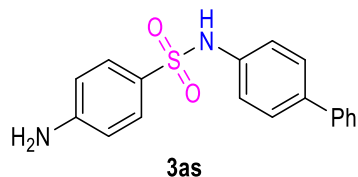

According to general procedure A, the product was purified by flash column chromatography on silica gel (petroleum ether/ethyl acetate = 10/1 to 3/1). Yellow solid, 35% yield, 11.4 mg, m.p. 230-233 °C. **<sup>1</sup>H NMR** (400 MHz, DMSO)  $\delta$  (s, 1H), 7.57 (d,  $J$  = 7.4 Hz, 2H), 7.52 (d,  $J$  = 8.6 Hz, 2H), 7.44 (s, 1H), 7.42 – 7.37 (m, 3H), 7.31 (d,  $J$  = 7.4 Hz, 1H), 7.15 (d,  $J$  = 8.6 Hz, 2H), 6.54 (d,  $J$  = 8.7 Hz, 2H), 5.99 (s, 2H). **<sup>13</sup>C NMR** (101 MHz, DMSO)  $\delta$  152.9, 139.5, 138.0, 135.0, 128.9, 128.8, 127.3, 127.1, 126.3, 124.4, 119.6, 112.6. **HRMS** (ESI-TOF,  $m/z$ ): Mass calcd. for C<sub>18</sub>H<sub>15</sub>N<sub>2</sub>O<sub>2</sub>S<sup>-</sup> [M - H]<sup>-</sup> 323.0860; found 323.0866.



***N*-([1,1'-biphenyl]-4-yl)-3-aminobenzenesulfonamide (3at)**

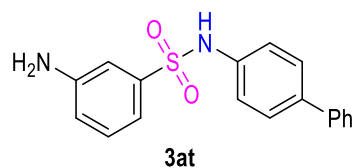

According to general procedure A, the product was purified by flash column chromatography on silica gel (petroleum ether/ethyl acetate = 10/1 to 3/1). Yellow solid, 43% yield, 13.9 mg, m.p. 101-103 °C. **<sup>1</sup>H NMR** (400 MHz, CDCl<sub>3</sub>)  $\delta$  7.52 (d,  $J$  = 7.0 Hz, 2H), 7.47 (d,  $J$  = 8.6 Hz, 2H), 7.41 (t,  $J$  = 7.6 Hz, 2H), 7.35 – 7.30 (m, 1H), 7.20 (t,  $J$  = 7.8 Hz, 1H), 7.15 (d,  $J$  = 8.6 Hz, 3H), 7.10 (t,  $J$  = 2.0 Hz, 1H), 6.83 (s, 1H), 6.80 (ddd,  $J$  = 7.8, 2.4, 1.2 Hz, 1H), 3.87 (s, 2H). **<sup>13</sup>C NMR** (101 MHz, CDCl<sub>3</sub>)  $\delta$  147.1, 140.1, 139.9, 138.3, 135.7, 130.0, 128.8, 127.9, 127.3, 126.8, 122.0, 119.3, 116.9, 112.9. **HRMS** (ESI-TOF, m/z): Mass calcd. for C<sub>18</sub>H<sub>15</sub>N<sub>2</sub>O<sub>2</sub>S<sup>-</sup> [M - H]<sup>-</sup> 323.0860; found 323.0870.

***N*-([1,1'-biphenyl]-4-yl)propane-1-sulfonamide (3au)**

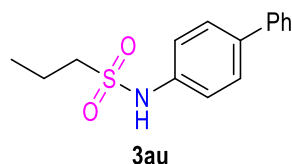

According to general procedure A, the product was purified by flash column chromatography on silica gel (petroleum ether/ethyl acetate = 10/1). White solid, 60% yield, 16.5 mg, m.p. 138-139 °C. **<sup>1</sup>H NMR** (400 MHz, CDCl<sub>3</sub>)  $\delta$  7.60 – 7.53 (m, 4H), 7.44 (t,  $J$  = 7.6 Hz, 2H), 7.38 – 7.32 (m, 1H), 7.29 (d,  $J$  = 8.6 Hz, 2H), 6.74 (s, 1H), 3.17 – 3.08 (m, 2H), 1.94 – 1.85 (m, 2H), 1.04 (t,  $J$  = 7.5 Hz, 3H). **<sup>13</sup>C NMR** (101 MHz, CDCl<sub>3</sub>)  $\delta$  140.1, 138.1, 136.0, 128.9, 128.3, 127.4, 126.9, 120.7, 53.4, 17.3, 12.9. **HRMS** (ESI-TOF, m/z): Mass calcd. for C<sub>15</sub>H<sub>16</sub>NO<sub>2</sub>S<sup>-</sup> [M - H]<sup>-</sup> 274.0907; found 274.0914.

***N*-([1,1'-biphenyl]-4-yl)cyclohexanesulfonamide (3av)**

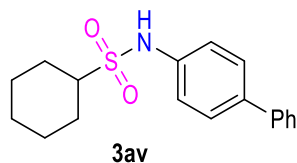

According to general procedure A, the product was purified by flash column chromatography on silica gel (petroleum ether/ethyl acetate = 10/1). White solid, 49% yield, 18.0 mg, m.p. 159-160 °C. **<sup>1</sup>H NMR** (400 MHz, CDCl<sub>3</sub>)  $\delta$  7.57 (d,  $J$  = 2.8 Hz, 2H), 7.55 (d,  $J$  = 2.2 Hz, 2H), 7.44 (t,  $J$  = 7.6 Hz, 2H), 7.35 (t,  $J$  = 7.3 Hz, 1H), 7.30 (d,  $J$  = 8.6 Hz, 2H), 6.82 (s, 1H), 3.06 (tt,  $J$  = 12.1, 3.5 Hz, 1H), 2.20 (ddd,  $J$  = 15.0, 4.8, 2.7 Hz, 2H), 1.88 (dq,  $J$  = 10.2, 3.5 Hz, 2H), 1.71 – 1.65 (m, 1H), 1.58 (dd,  $J$  = 12.4, 3.6 Hz, 1H), 1.24 (q,  $J$  = 12.1, 11.6 Hz, 4H). **<sup>13</sup>C NMR** (101 MHz, CDCl<sub>3</sub>)  $\delta$  140.1, 137.6, 136.5, 128.8, 128.2, 127.3, 126.8, 120.3, 60.4, 26.3, 25.0, 24.9. **HRMS** (ESI-TOF,  $m/z$ ): Mass calcd. for C<sub>18</sub>H<sub>20</sub>NO<sub>2</sub>S<sup>+</sup> [M - H]<sup>+</sup> 314.1220; found 314.1229.

***N*-([1,1'-biphenyl]-4-yl)cyclopentanesulfonamide (3aw)**

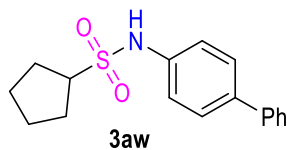

According to general procedure A, the product was purified by flash column chromatography on silica gel (petroleum ether/ethyl acetate = 10/1). White solid, 42% yield, 12.7 mg, m.p. 118-120 °C. **<sup>1</sup>H NMR** (400 MHz, CDCl<sub>3</sub>)  $\delta$  7.57 (d,  $J$  = 1.6 Hz, 2H), 7.55 (d,  $J$  = 2.1 Hz, 2H), 7.44 (t,  $J$  = 7.6 Hz, 2H), 7.37 – 7.34 (m, 1H), 7.31 (d,  $J$  = 8.6 Hz, 2H), 6.80 (s, 1H), 3.60 (ddd,  $J$  = 16.0, 8.8, 7.1 Hz, 1H), 2.09 (dt,  $J$  = 15.4, 7.6 Hz, 2H), 2.05 – 1.95 (m, 2H), 1.87 – 1.77 (m, 2H), 1.63 – 1.55 (m, 2H). **<sup>13</sup>C NMR** (101 MHz, CDCl<sub>3</sub>)  $\delta$  140.1, 138.1, 136.2, 128.9, 128.2, 127.4, 126.9, 121.1, 60.6, 28.0, 25.9. **HRMS** (ESI-TOF,  $m/z$ ): Mass calcd. for C<sub>17</sub>H<sub>18</sub>NO<sub>2</sub>S [M - H]<sup>+</sup> 300.1064; found 300.1074.

## 11. References

- [1] Miyaura, N.; Yamada, K.; Suzuki, A. A new stereospecific cross-coupling by the palladium-catalyzed reaction of 1-alkenylboranes with 1-alkenyl or 1-alkynyl halides. *Tetrahedron Lett.* **1979**, *20*, 3437-3440.
- [2] Dewan, A.; Bora, U.; Borah, G. Coordination from Heteroscorpionate Ligand Towards Pd(II) via Pd...H $\delta$ -C(sp<sup>3</sup>) Interaction: Structural and Catalytic Studies. *Eur. J. Inorg. Chem.* **2021**, *2021*, 2661-2668.
- [3] Hang, Z.; Tong, X.; Li, Z.; Wang, Z.; Xue, W. A practical method for N-cyanation of secondary amines and sulfonamides. *Tetrahedron Lett.* **2022**, *88*, 153564-153560.
- [4] Feng, C.-W.; Wang, D.-Y.; Lu, H.-L.; Xi, Z.-W.; Shen, Y.-M.; Cao, J. Photocatalytic Synthesis of Sulfinamides and Sulfoxides from Nitroarenes and Thiophenols. *Org. Lett.* **2022**, *24*, 4485-4489.
- [5] Meyer, A. U.; Wimmer, A.; König, B. Visible-Light-Accelerated C-H Sulfinylation of Heteroarenes. *Angew. Chem. Int. Ed.* **2017**, *56*, 409–412.
- [6] Rehm, D.; Weller, A. Kinetics of Fluorescence Quenching by Electron and H-Atom Transfer. *Isr. J. Chem.* **1970**, *8*, 259-271.
- [7] Chen, T.; Li, W.-Q.; Liu, Z.; Jiang, W.; Liu, T.; Yang, Q.; Zhu, X.-L.; Yang, G.-F. Discovery of Biphenyl-Sulfonamides as Novel  $\beta$ -N-Acetyl-d-Hexosaminidase Inhibitors via Structure-Based Virtual Screening. *J. Agric. Food Chem.* **2016**, *69*, 12039-12047.
- [8] Kundu, A.; Dey, D.; Pal, S.; Adhikari, D. Pyrazole-Mediated C-H Functionalization of Arene and Heteroarenes for Aryl-(Hetero)aryl Cross-Coupling Reactions. *J. Org. Chem.* **2021**, *86*, 15665–15673.
- [9] Solodenko, W.; Mennecke, K.; Vogt, C.; Gruhl, S.; Kirschning, A. Polyvinylpyridine, a Versatile Solid Phase for Coordinative Immobilisation of Palladium Precatalysts - Applications in Suzuki-Miyaura Reactions. *Synthesis* **2006**, *11*, 1873-1881.
- [10] Ansari, T. N.; Sharma, S.; Hazra, S.; Jasinski, J. B.; Wilson, A. J.; Hicks, F.; Leahy,

- D. K.; Handa, S. Shielding Effect of Nanomicelles: Stable and Catalytically Active Oxidizable Pd(0) Nanoparticle Catalyst Compatible for Cross-Couplings of Water-Sensitive Acid Chlorides in Water. *JACS Au* **2021**, *1*, 1506-1513.
- [11] Pentsak, E. O.; Ananikov, V. P.; Pseudo-Solid-State Suzuki–Miyaura Reaction and the Role of Water Formed by Dehydration of Arylboronic Acids. *Eur. J. Org. Chem.* **2019**, *2019*, 4239-4247.
- [12] Izquierdo, F.; Corpet, M.; Nolan, S. P. The Suzuki–Miyaura Reaction Performed Using a Palladium–N-Heterocyclic Carbene Catalyst and a Weak Inorganic Base. *Eur. J. Org. Chem.* **2015**, *2015*, 1920-1924.
- [13] Zhang, Z.; Hu, Z.; Yu, Z.; Chi, H.; Lei, P.; Wang, Y.; He, R. Pd-Catalyzed Synthesis of Biphenyls with Methylthio Group. *Synth. Commun.* **2007**, *37*, 683-690.
- [14] Ibrahimia, M.; Khoumerib, O.; Abderrahima, R.; Termeb, T.; Vanelle, P. Synthesis of 3-Benzylphthalide Derivatives by Using a TDAE Strategy. *Synlett* **2021**, *32*, 283-286.
- [15] Jadhav, S.; Jagdale, A.; Kamble, S.; Kumbhar, A.; Salunkhe, R. Palladium nanoparticles supported on a titanium dioxide cellulose composite (PdNPs@TiO<sub>2</sub>–Cell) for ligand-free carbon–carbon cross coupling reactions. *RSC Adv.* **2016**, *6*, 3406-3420.
- [16] Pruschinski, L.; Lücke, A.-L.; Freese, T.; Kahnert, S.-R.; Mummel, S.; Schmidt, A. Suzuki–Miyaura Cross-Couplings under Acidic Conditions. *Synthesis* **2020**, *52*, 882-892.
- [17] Peng, P.; Yan, X.; Zhang, K.; Liu, Z.; Zeng, L.; Chen, Y.; Zhang, H.; Lei, A. Electrochemical C–C bond cleavage of cyclopropanes towards the synthesis of 1,3-difunctionalized molecules. *Nature Commun.* **2021**, *12*, 3075-3082.
- [18] Polley, A.; Bairy, G.; Das, P.; Jana, R. Triple Mode of Alkylation with Ethyl Bromodifluoroacetate: *N*, or *O*-Difluoromethylation, *N*-Ethylation and *S*-(ethoxycarbonyl)difluoromethylation. *Adv. Synth. Catal.* **2018**, *360*, 4161–416.
- [19] Raju, B.; Kogan, T. P. Solid phase synthesis of sulfonamides using a carbamate

linker. *Tetrahedron Lett.* **1997**, 38, 3373-3376.

## Appendix: $^1\text{H}$ NMR, $^{13}\text{C}$ NMR, $^{19}\text{F}$ NMR spectra for new compounds

### 4-nitro-1,1'-biphenyl (1a)

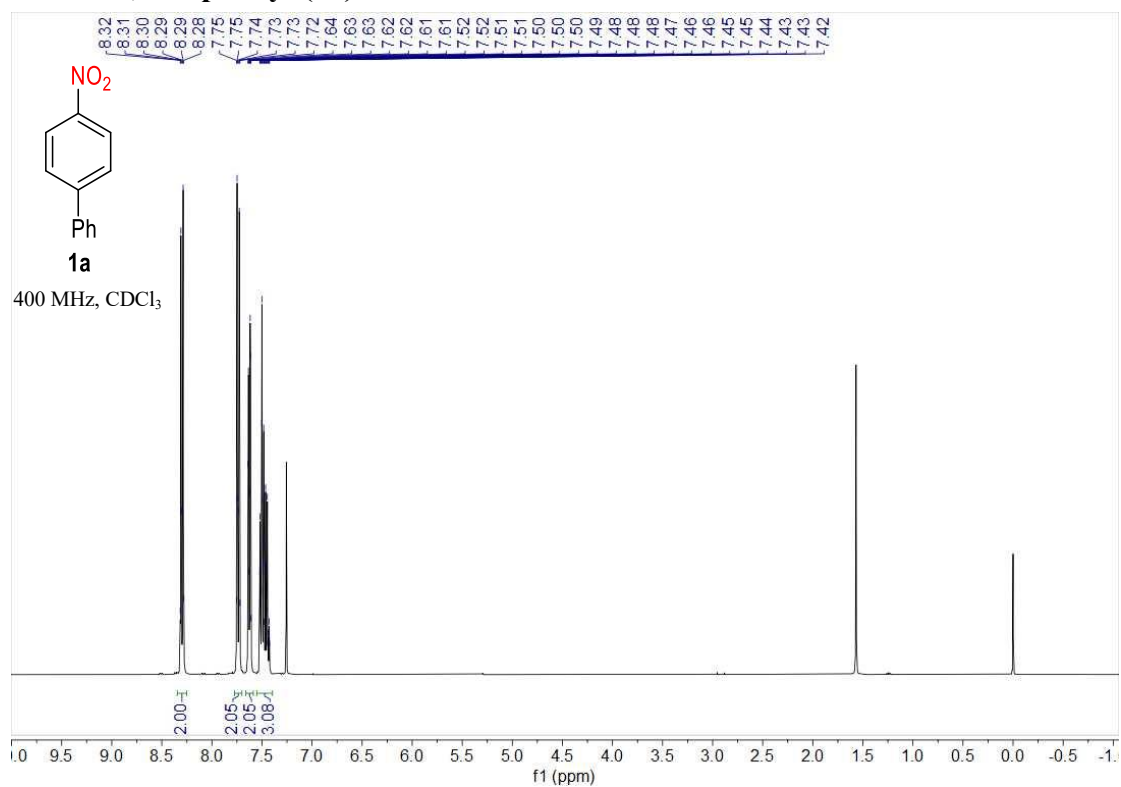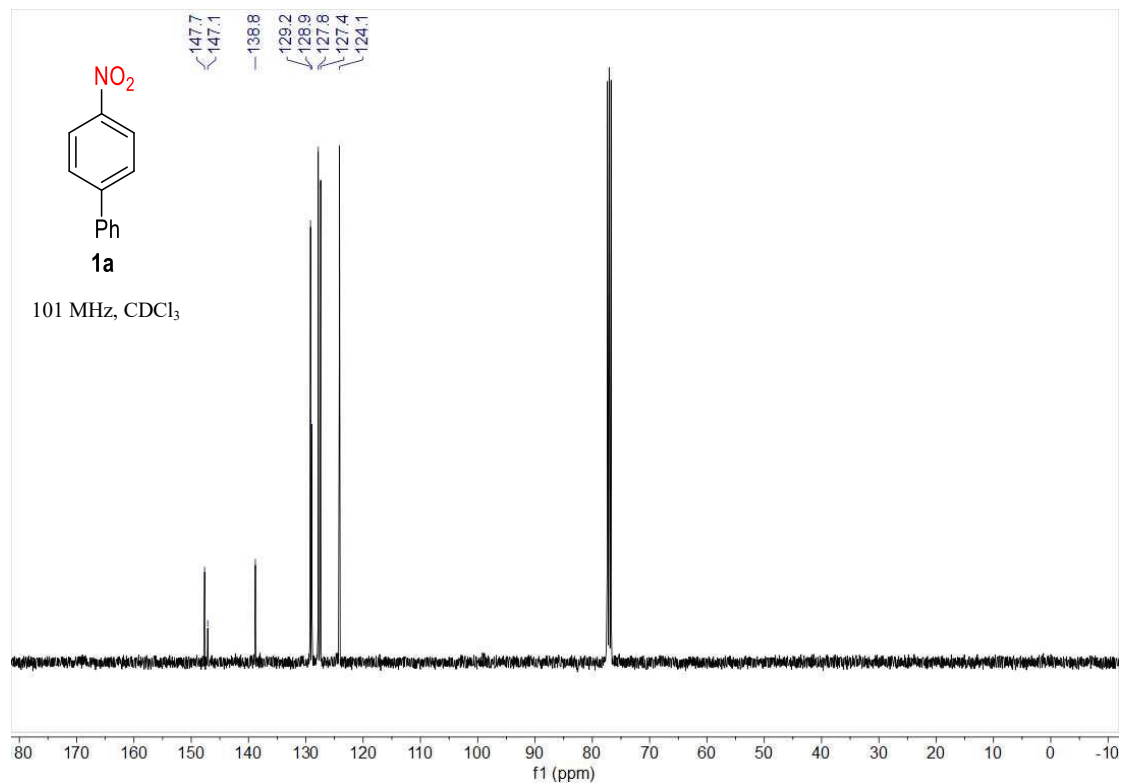

**4-(*tert*-butyl)-4'-nitro-1,1'-biphenyl (1b)**

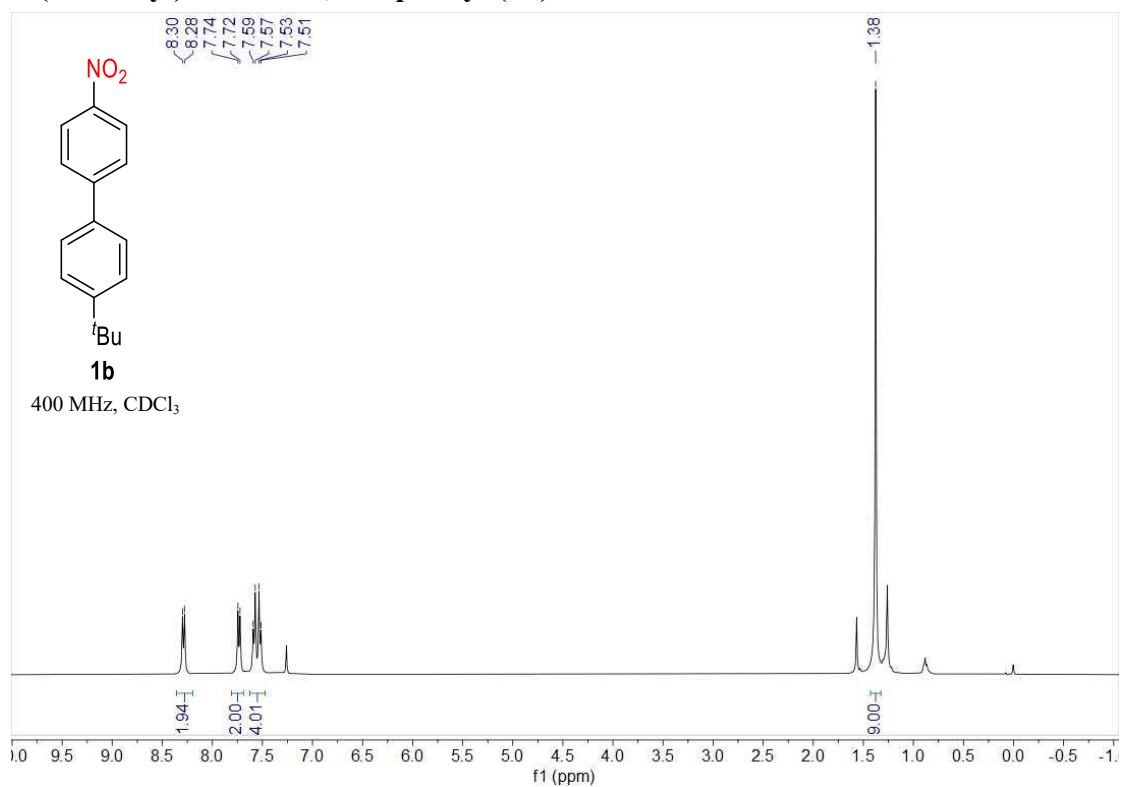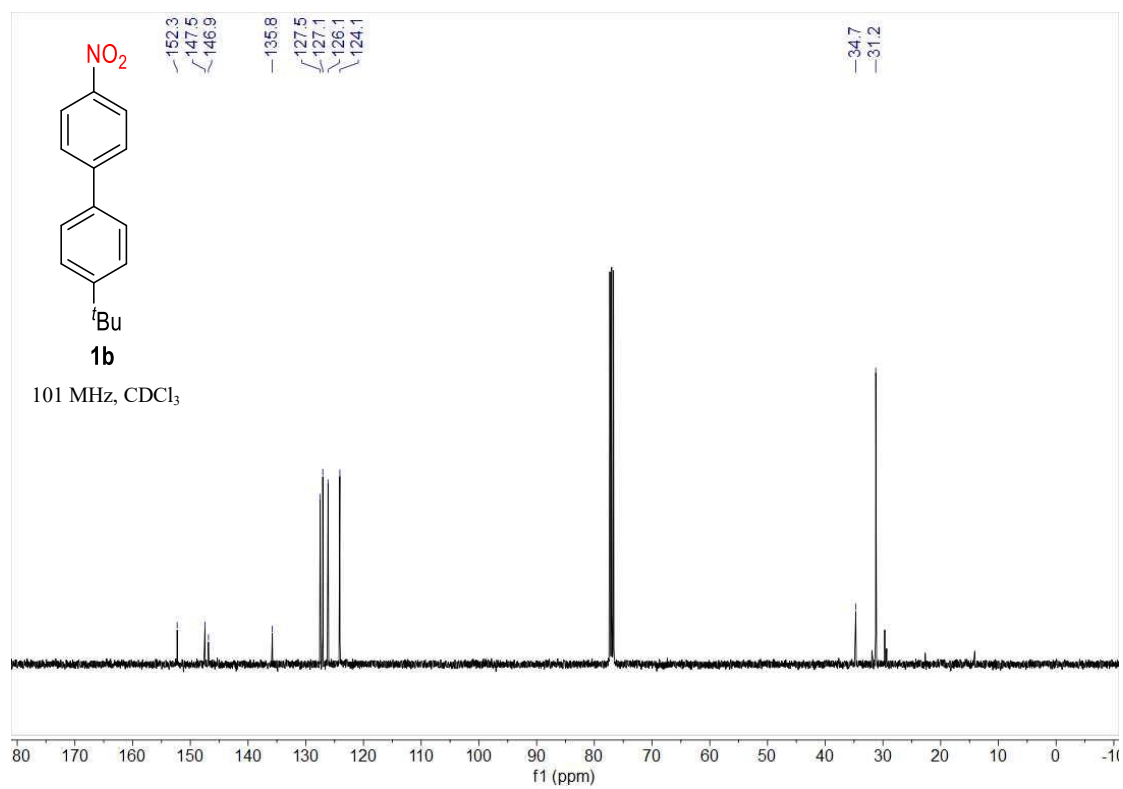

# 1-methoxy-4-nitrobenzene (1c)

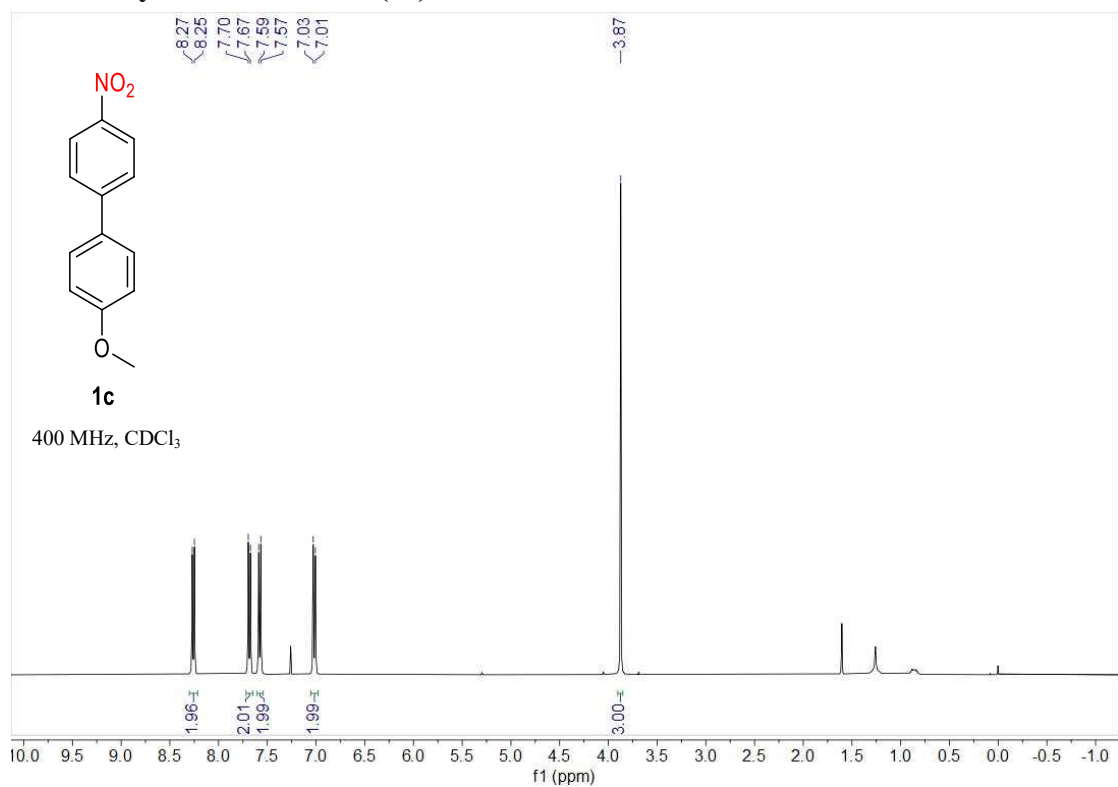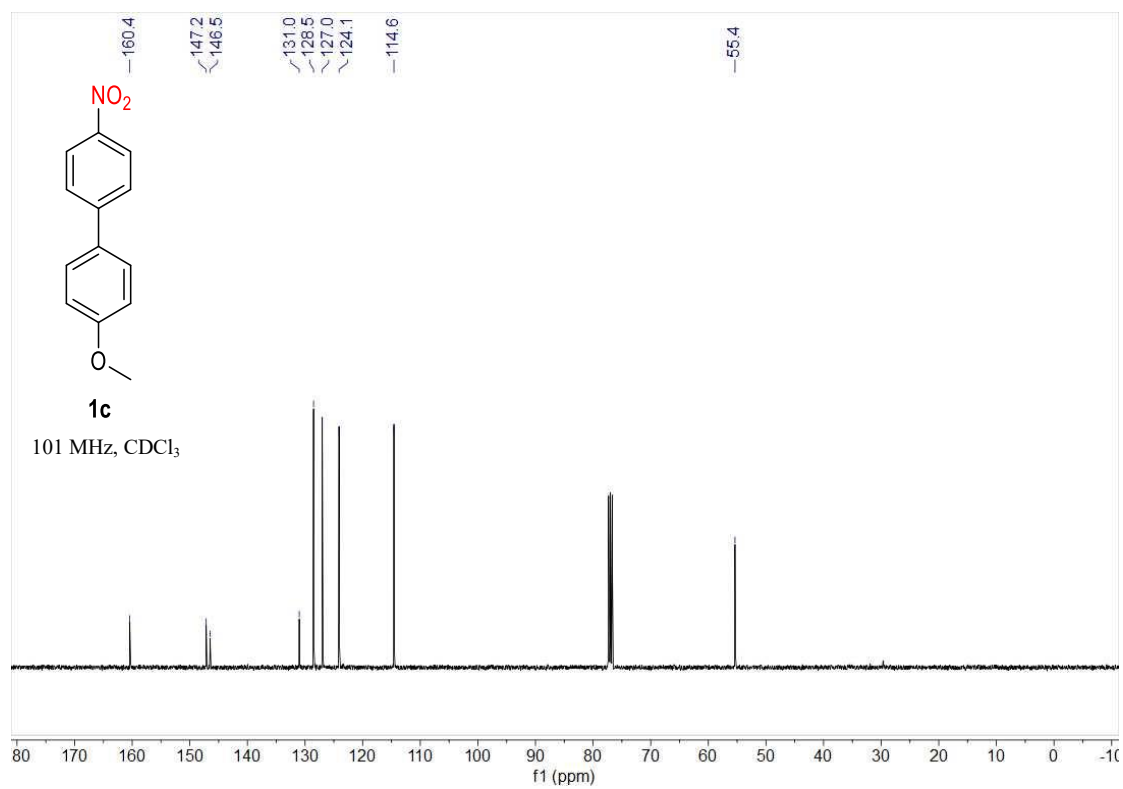



**4'-nitro-3-(trifluoromethyl)-1,1'-biphenyl (1d)**

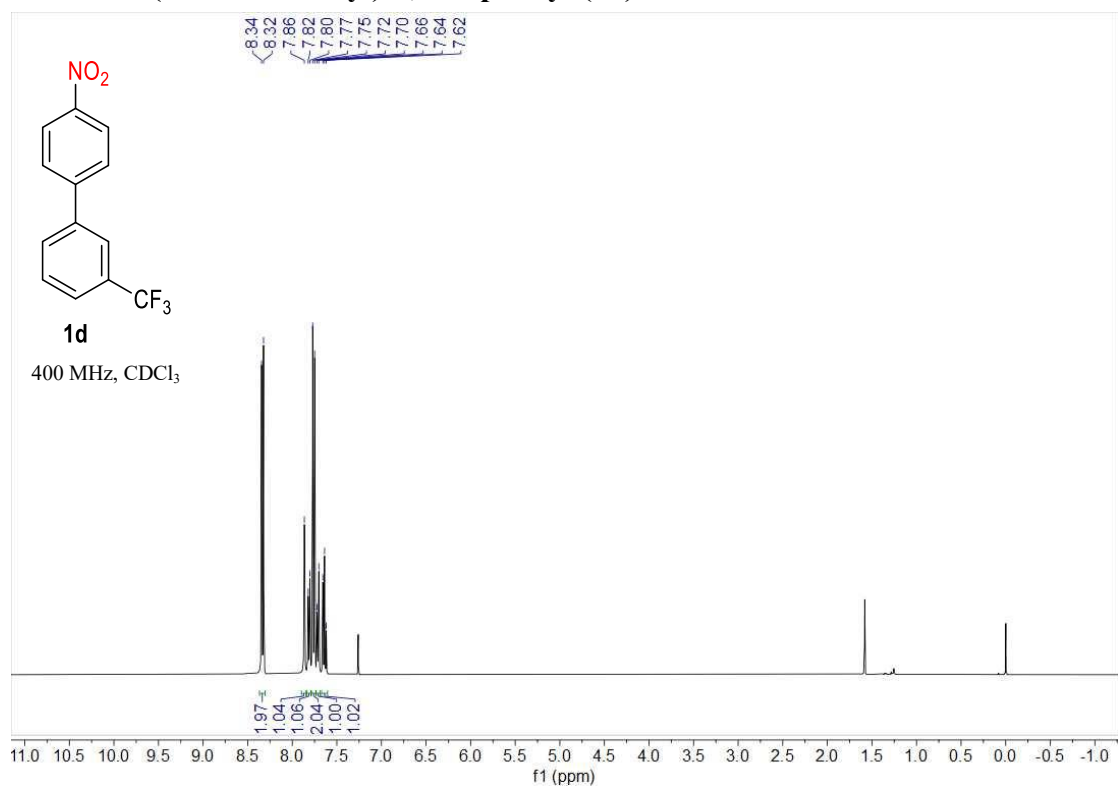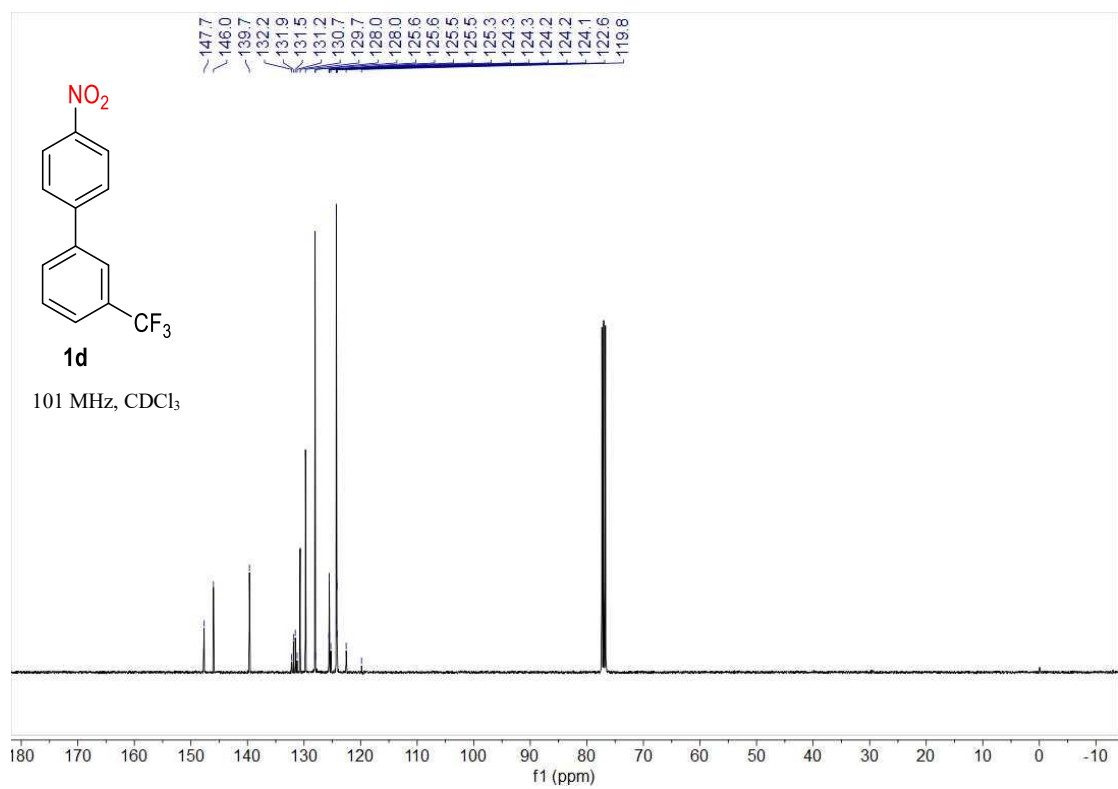

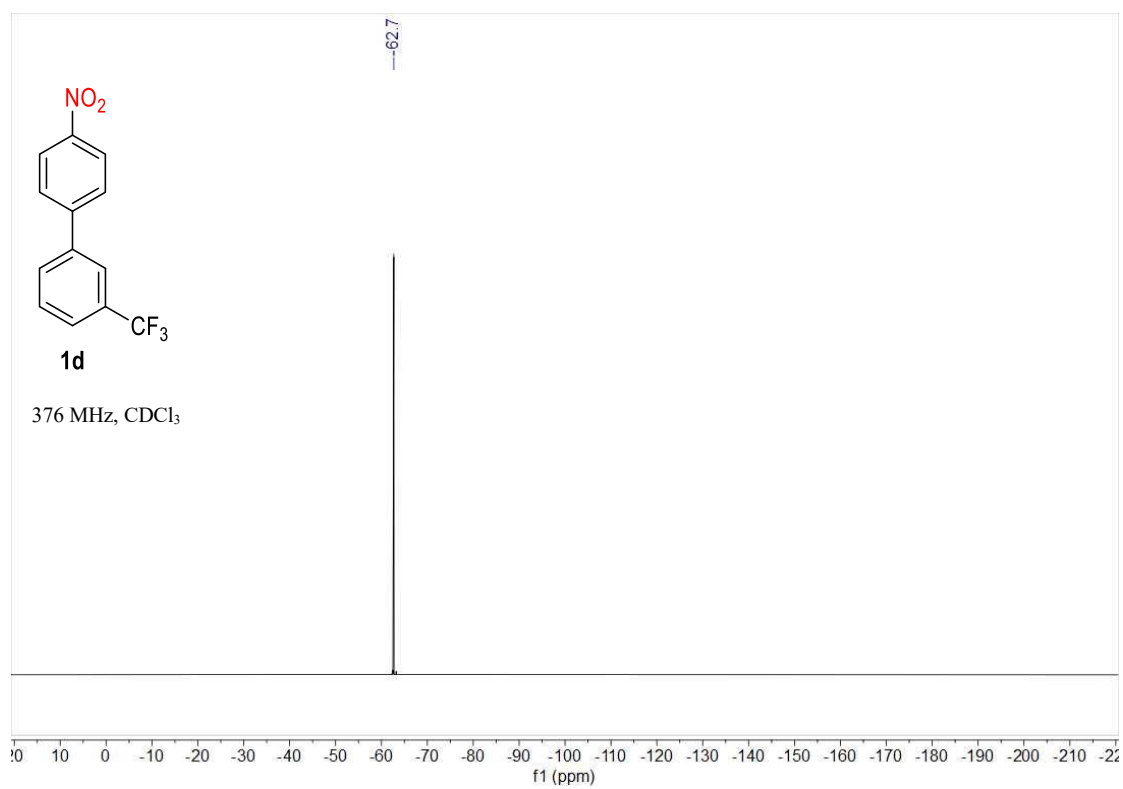

4'-nitro-[1,1'-biphenyl]-4-carbonitrile (**1e**)

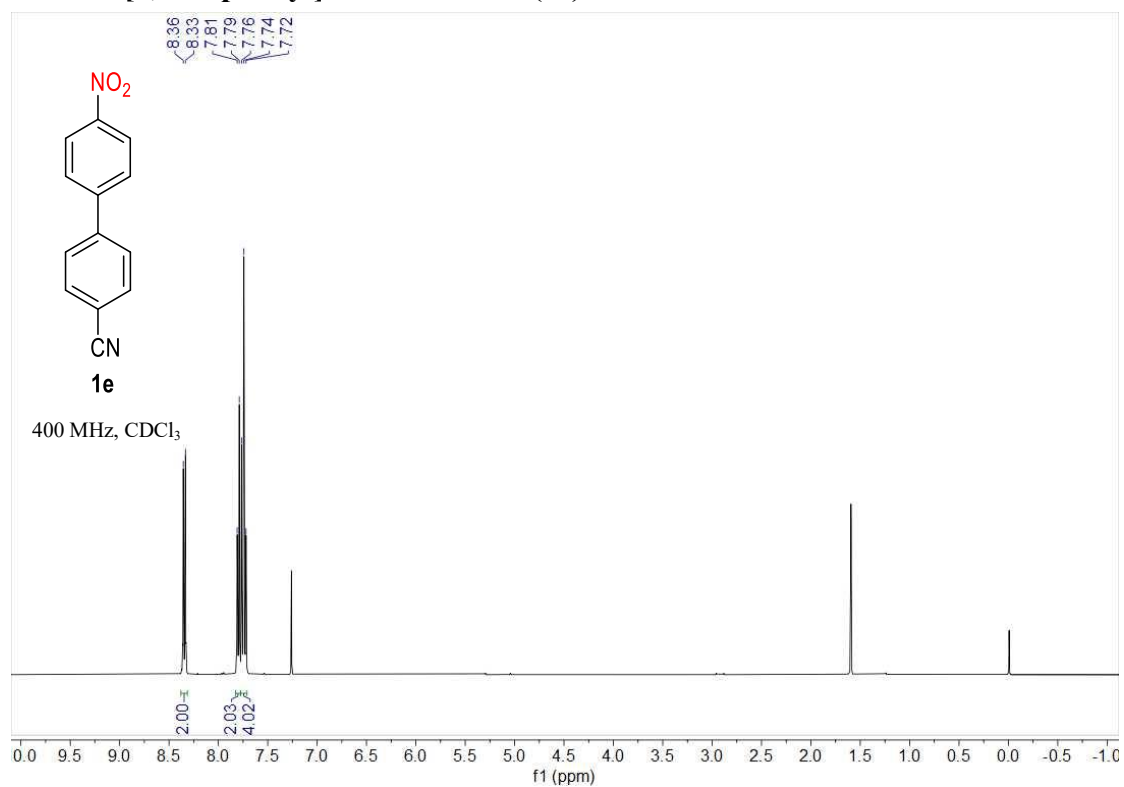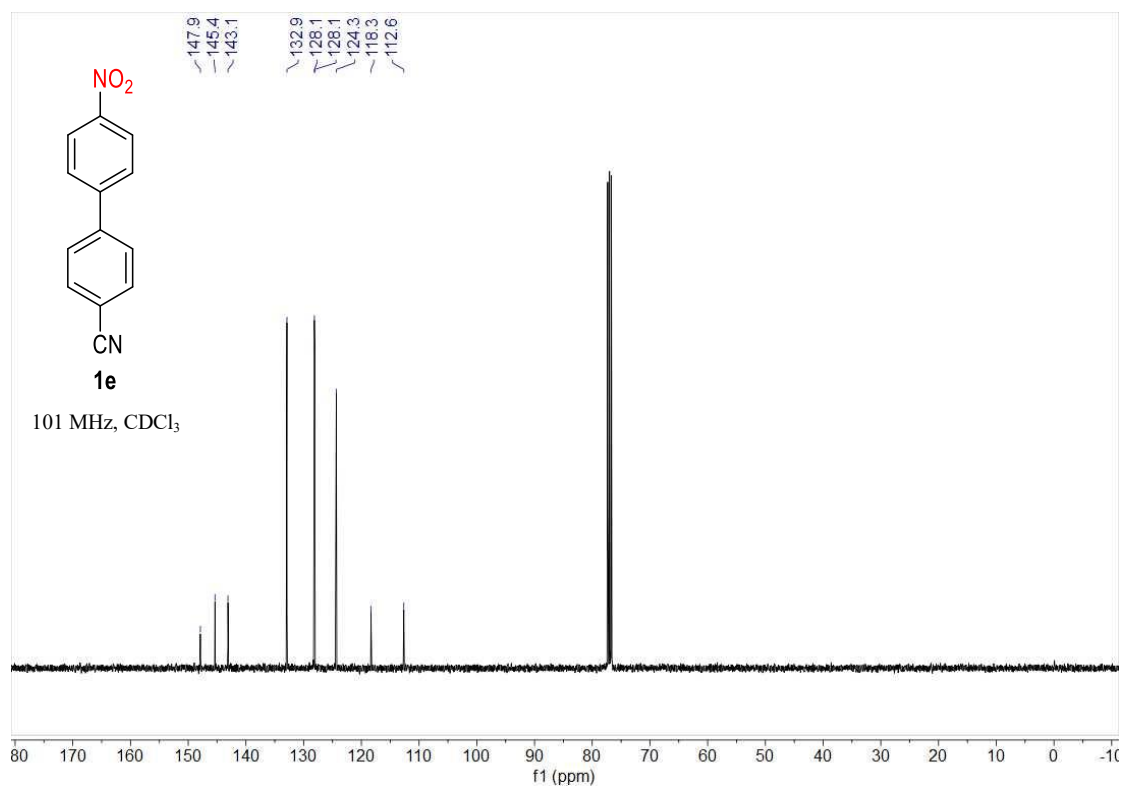

## 2-fluoro-4'-nitro-1,1'-biphenyl (1f)

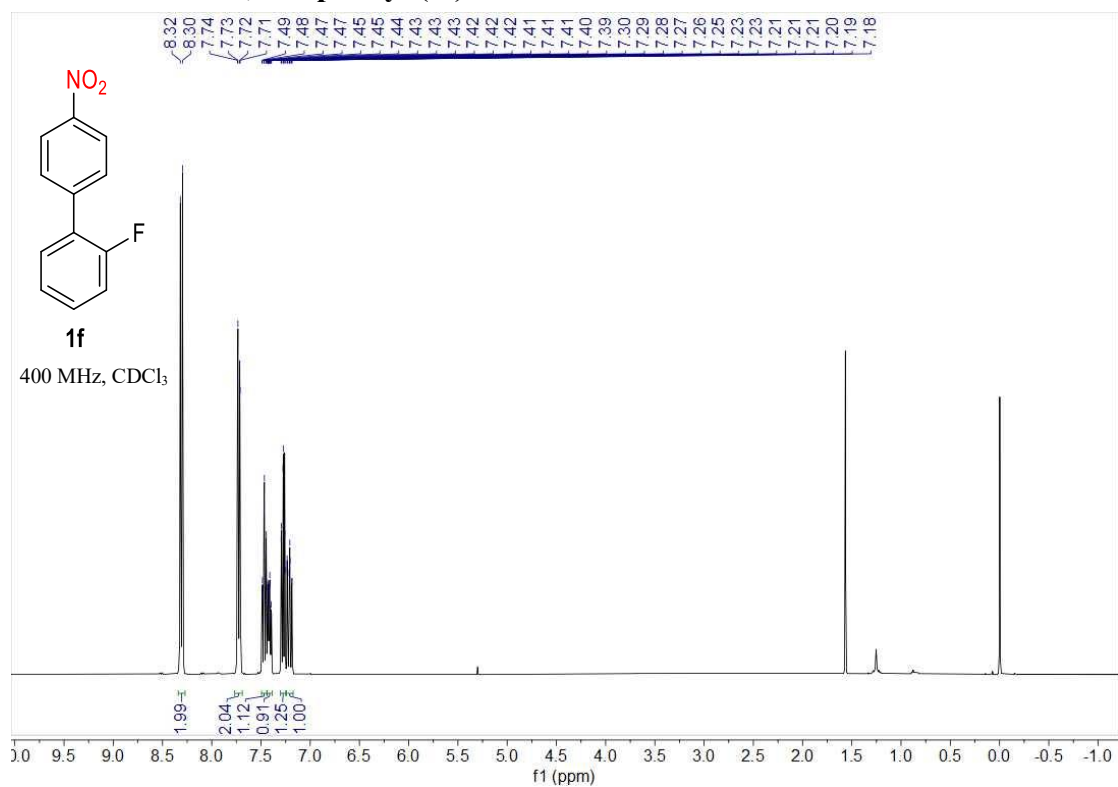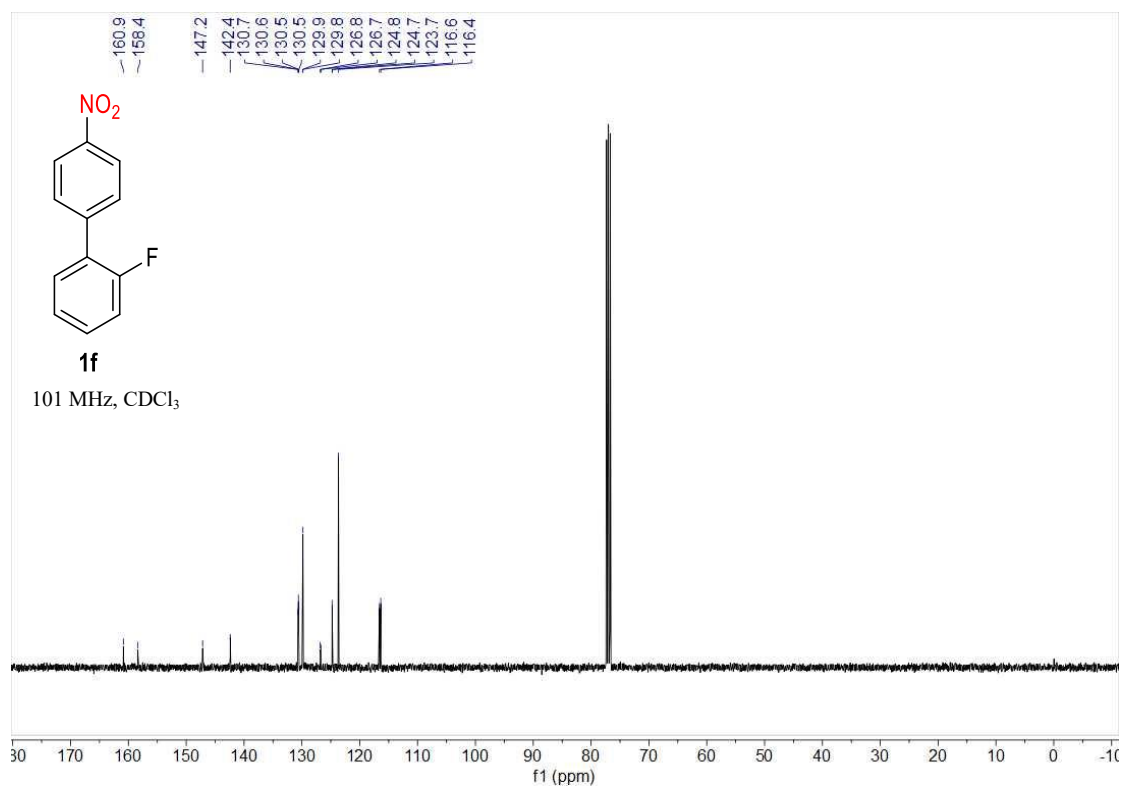

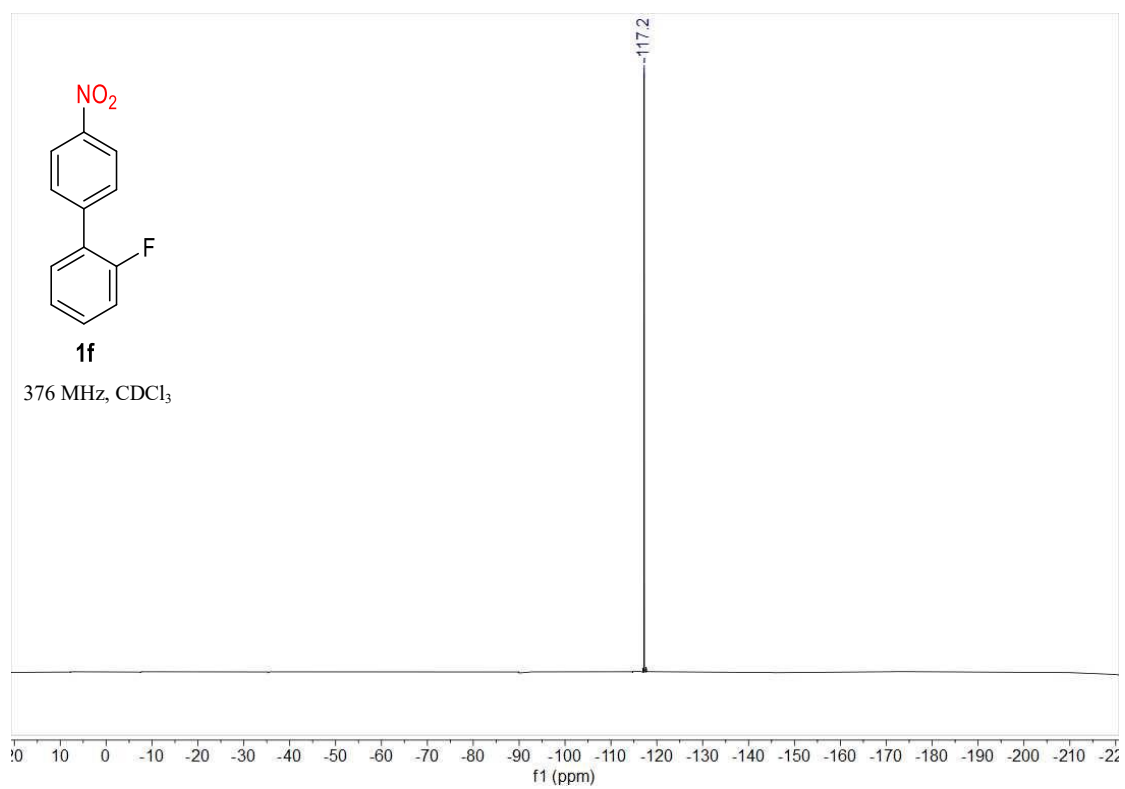

**2-bromo-4'-nitro-1,1'-biphenyl (1g)**

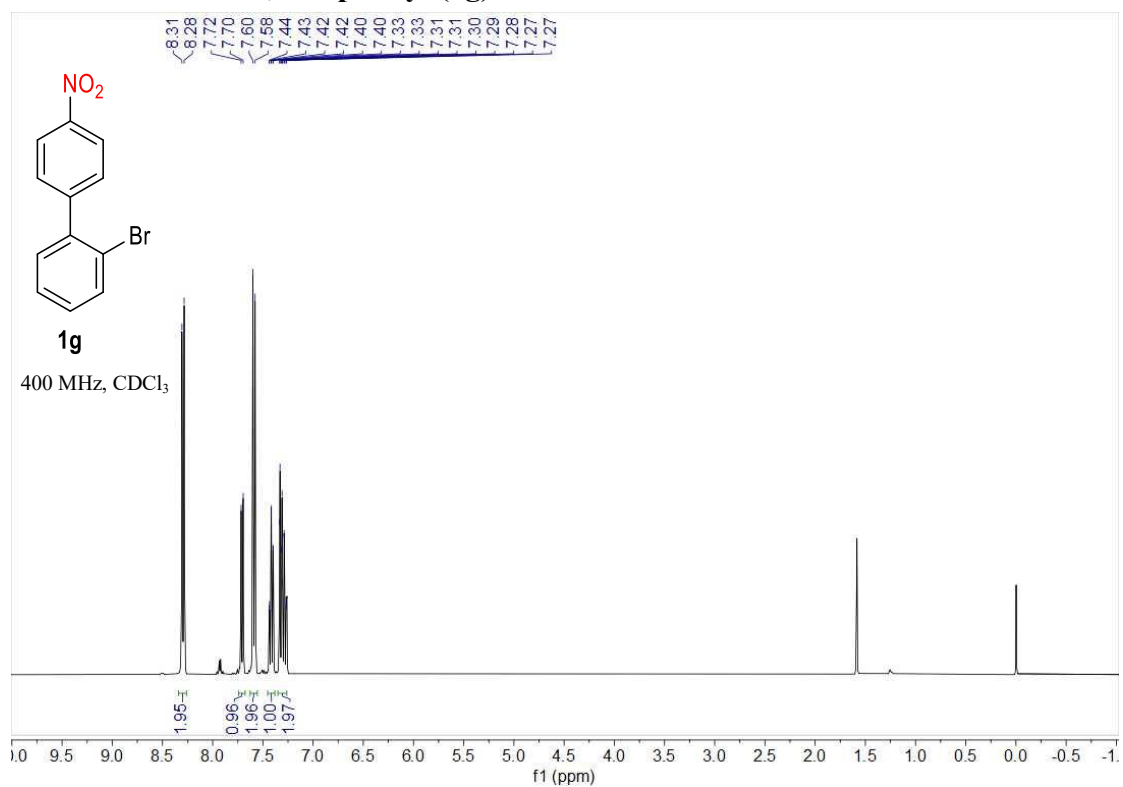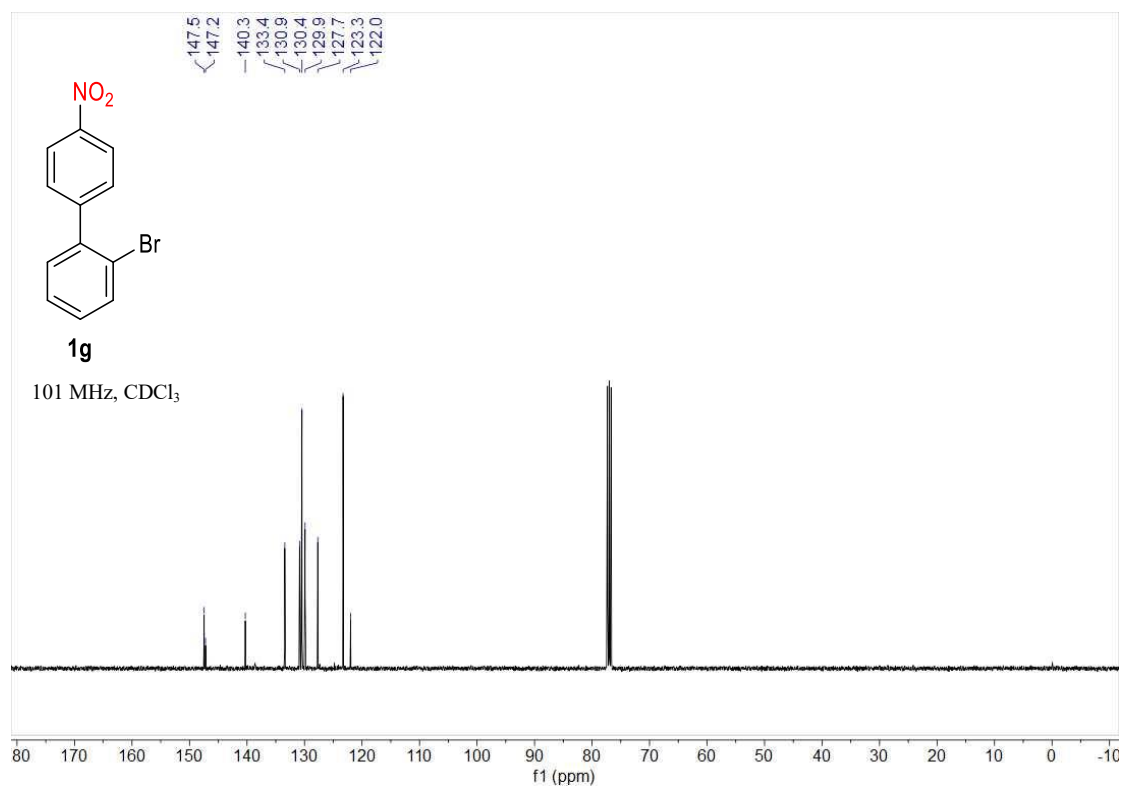

**3-fluoro-4'-nitro-1,1'-biphenyl (1h)**

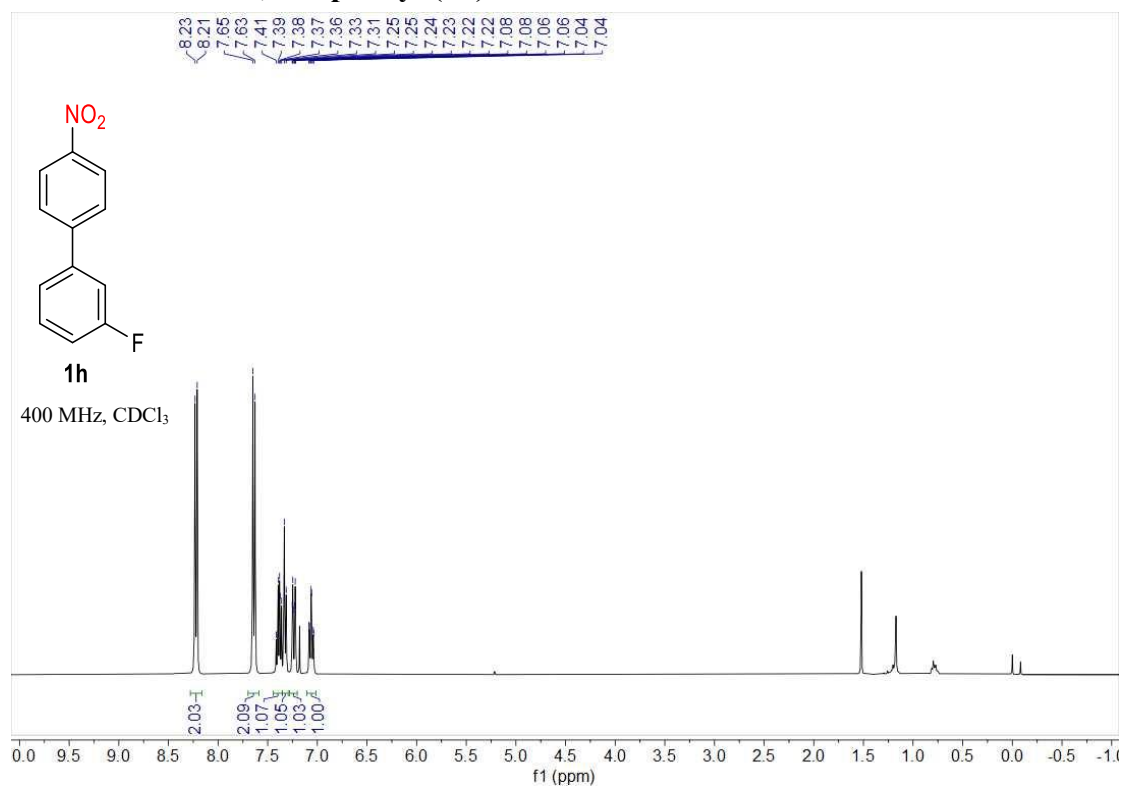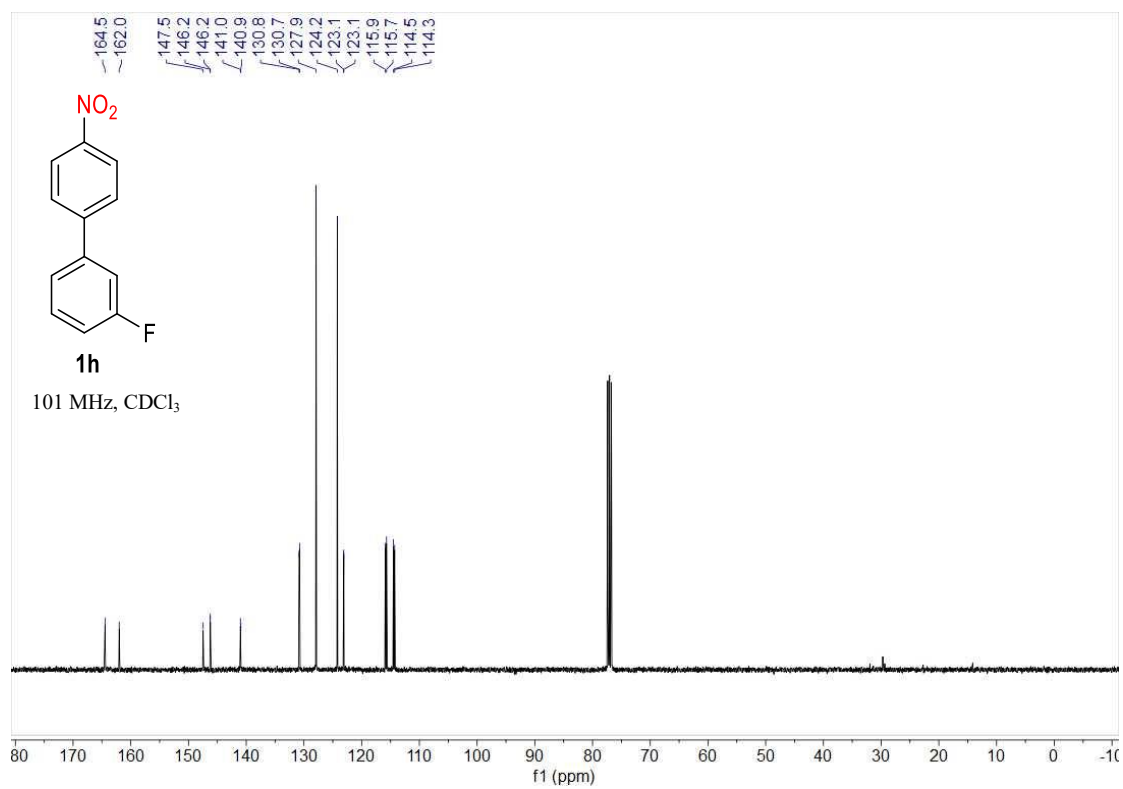

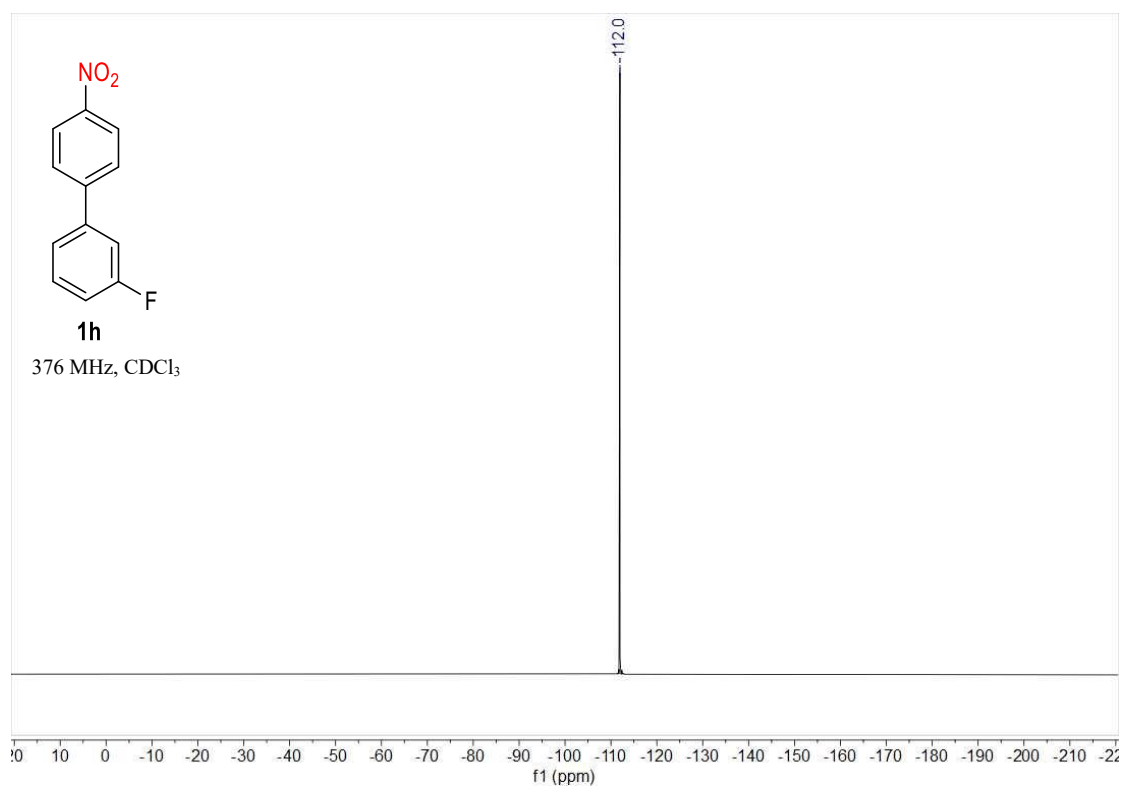



### 3-chloro-4'-nitro-1,1'-biphenyl (1i)

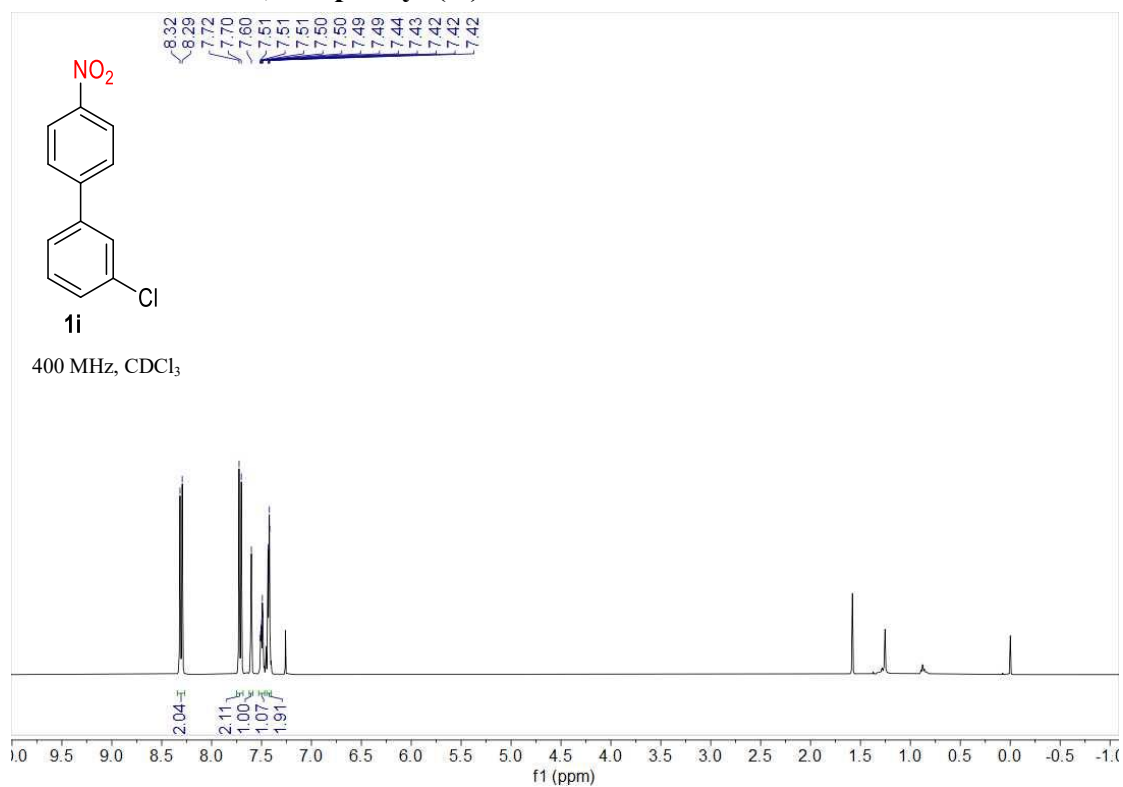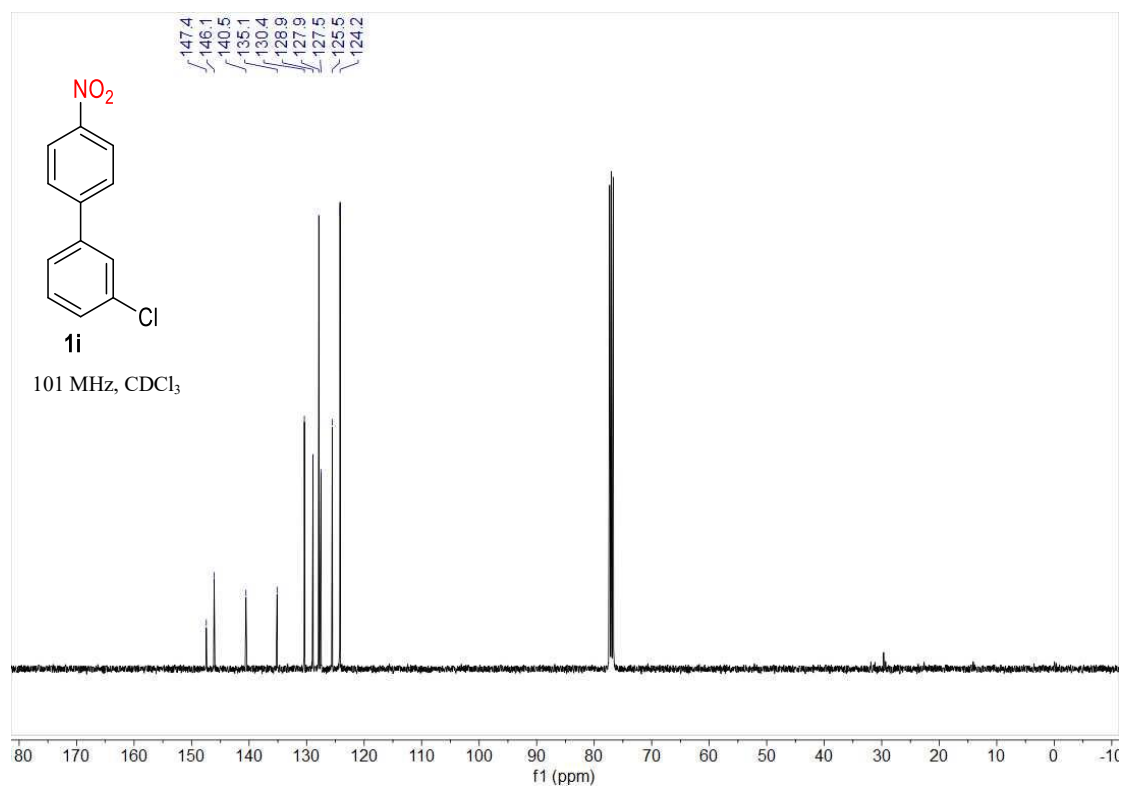

**4-fluoro-4'-nitro-1,1'-biphenyl (1j)**

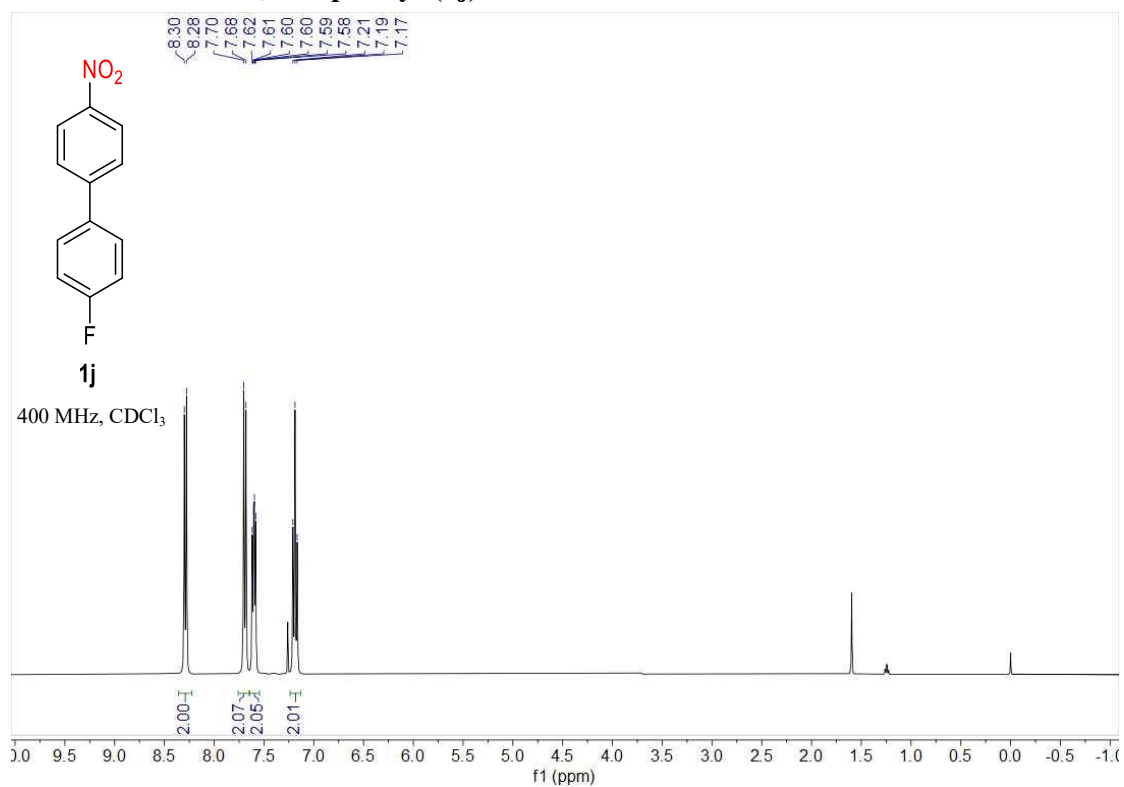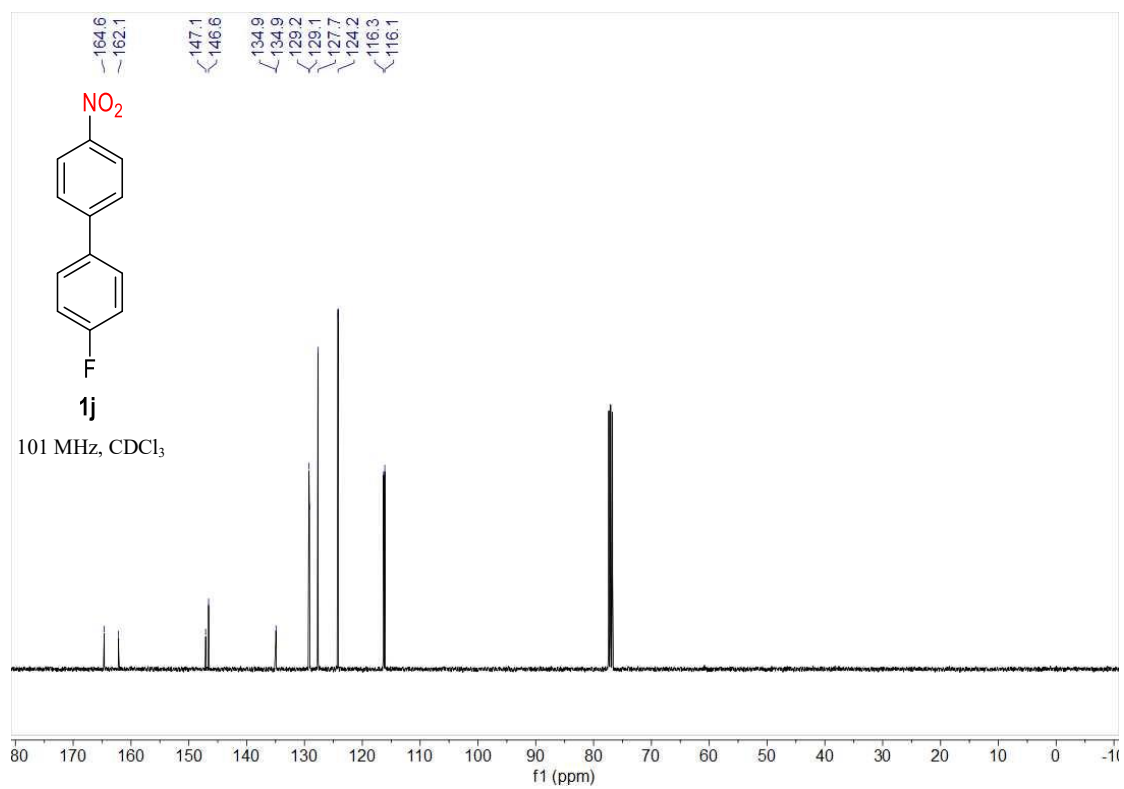

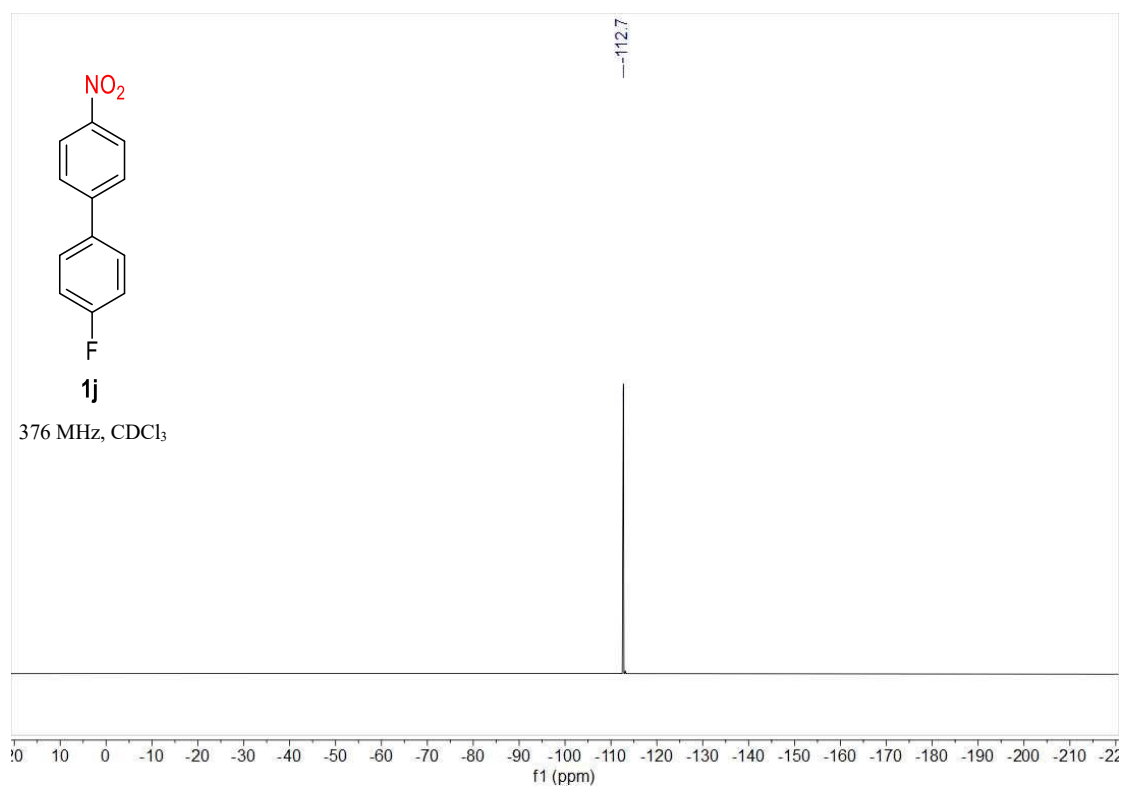

**methyl 4'-nitro-[1,1'-biphenyl]-4-carboxylate (1k)**

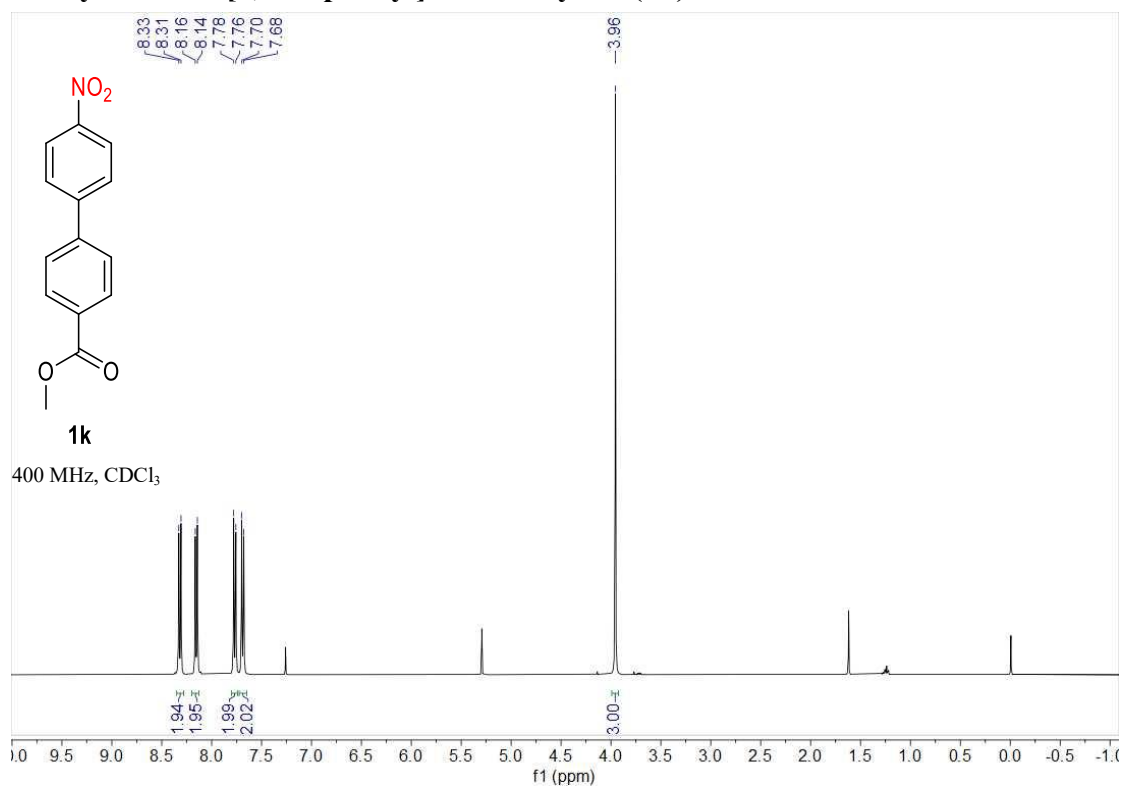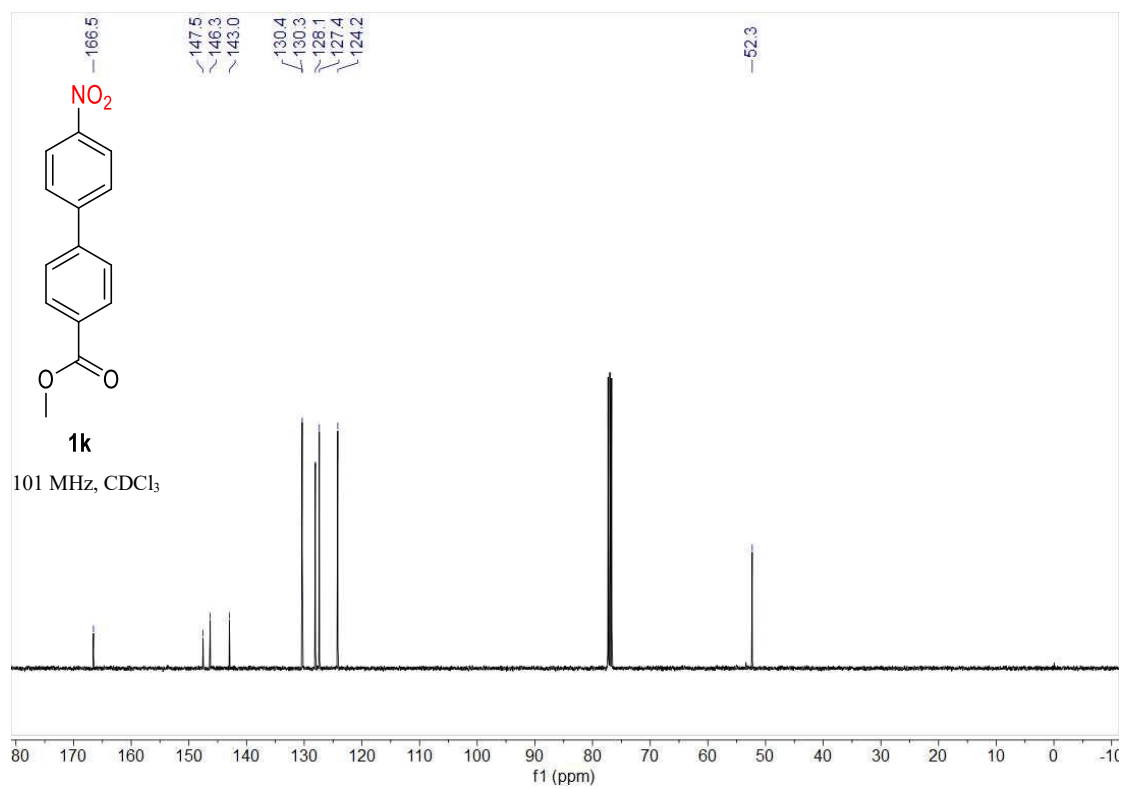

**methyl(4'-nitro-[1,1'-biphenyl]-3-yl)sulfane (1l)**

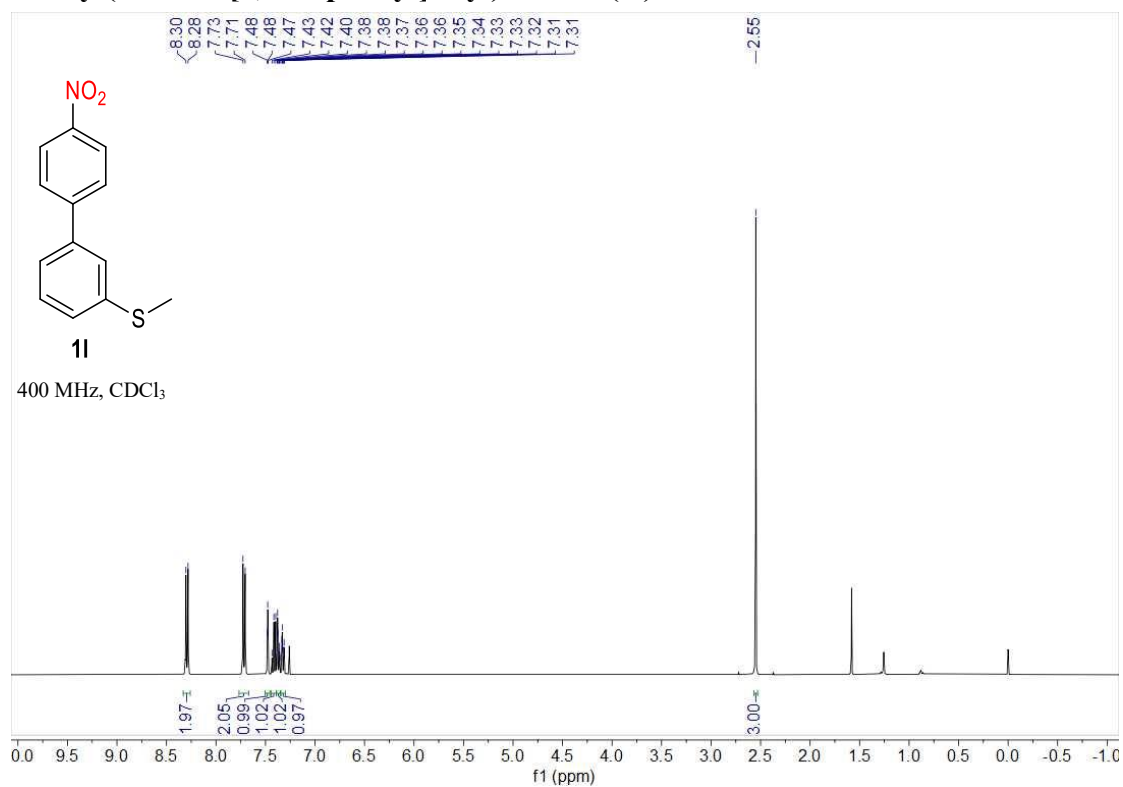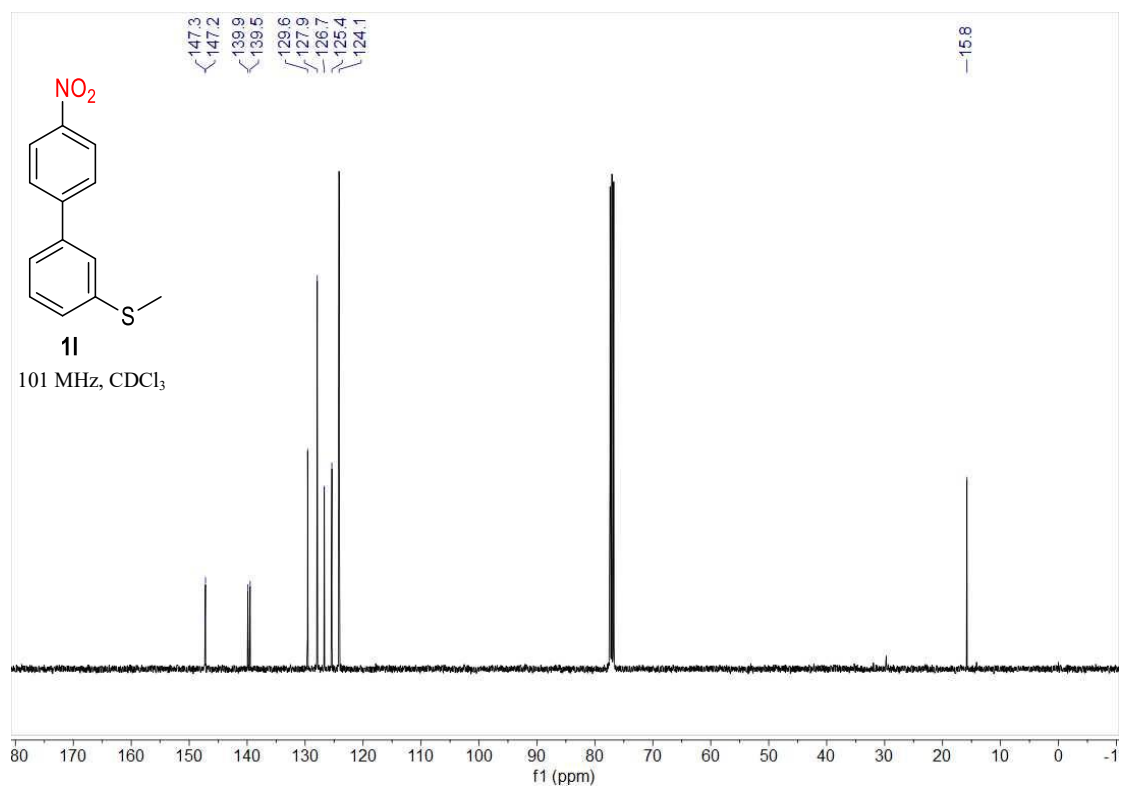

**1-(4'-nitro-[1,1'-biphenyl]-4-yl)ethan-1-one (1m)**

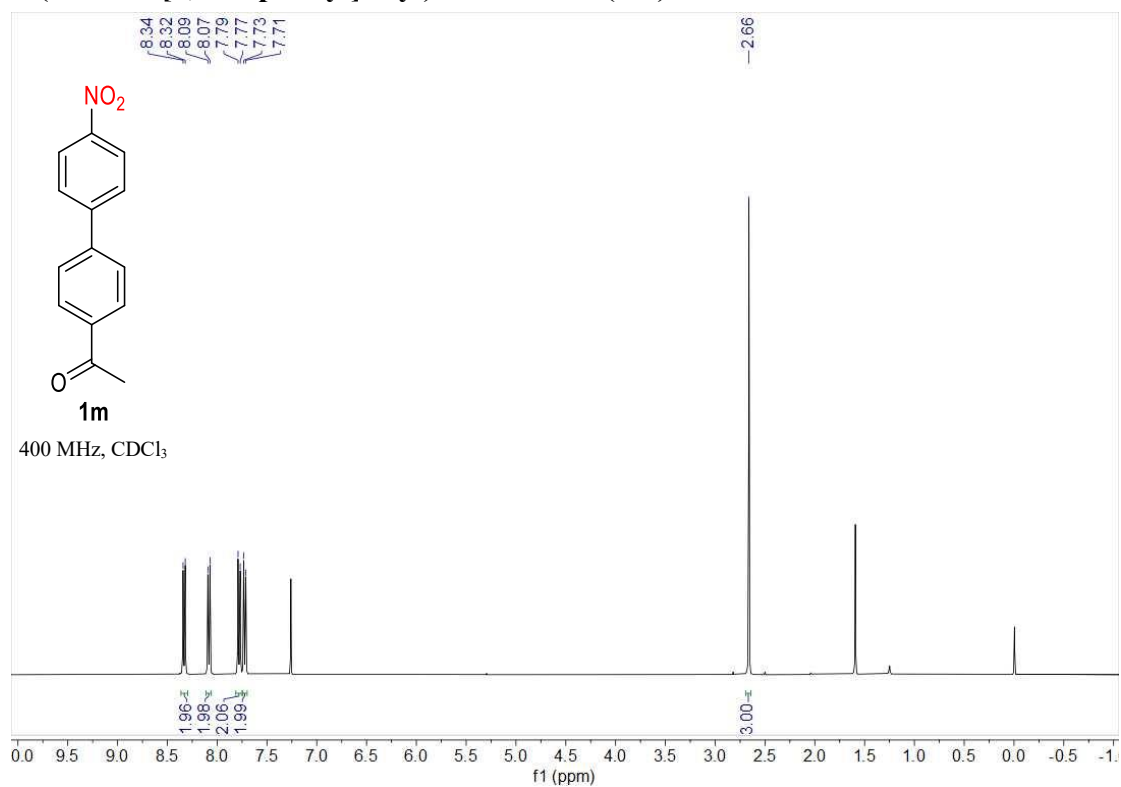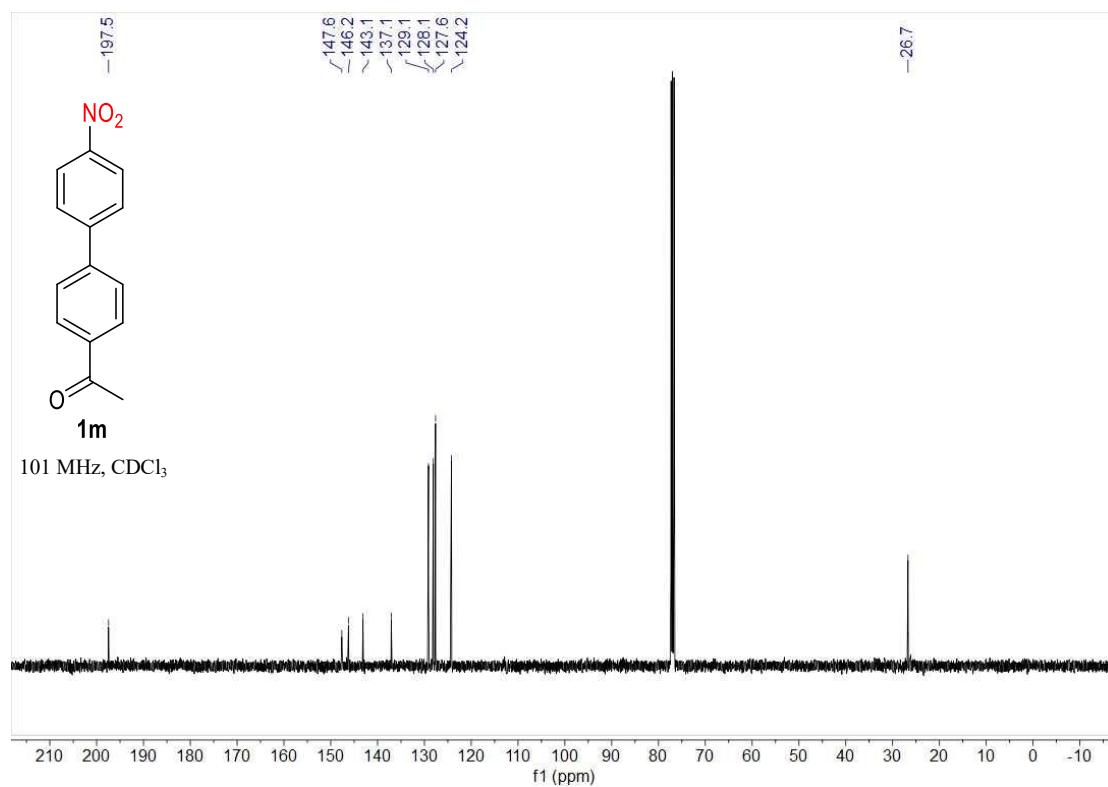

**4'-nitro-[1,1'-biphenyl]-4-carbaldehyde (1n)**

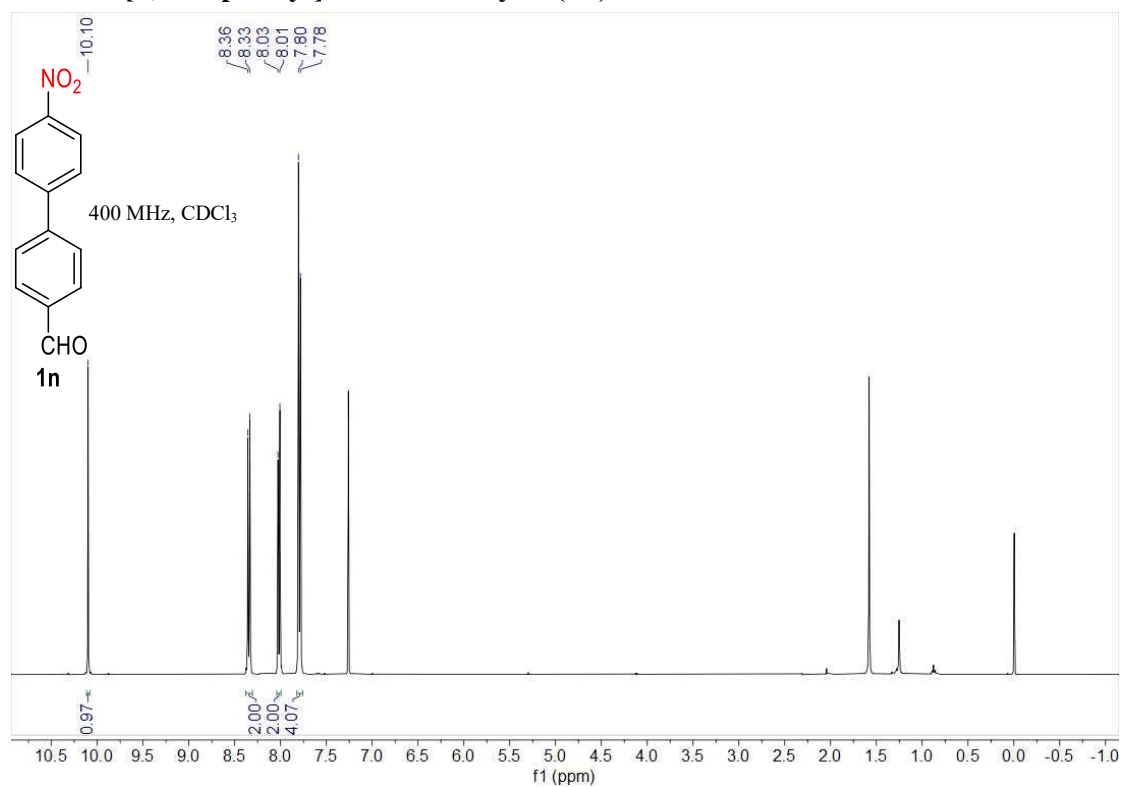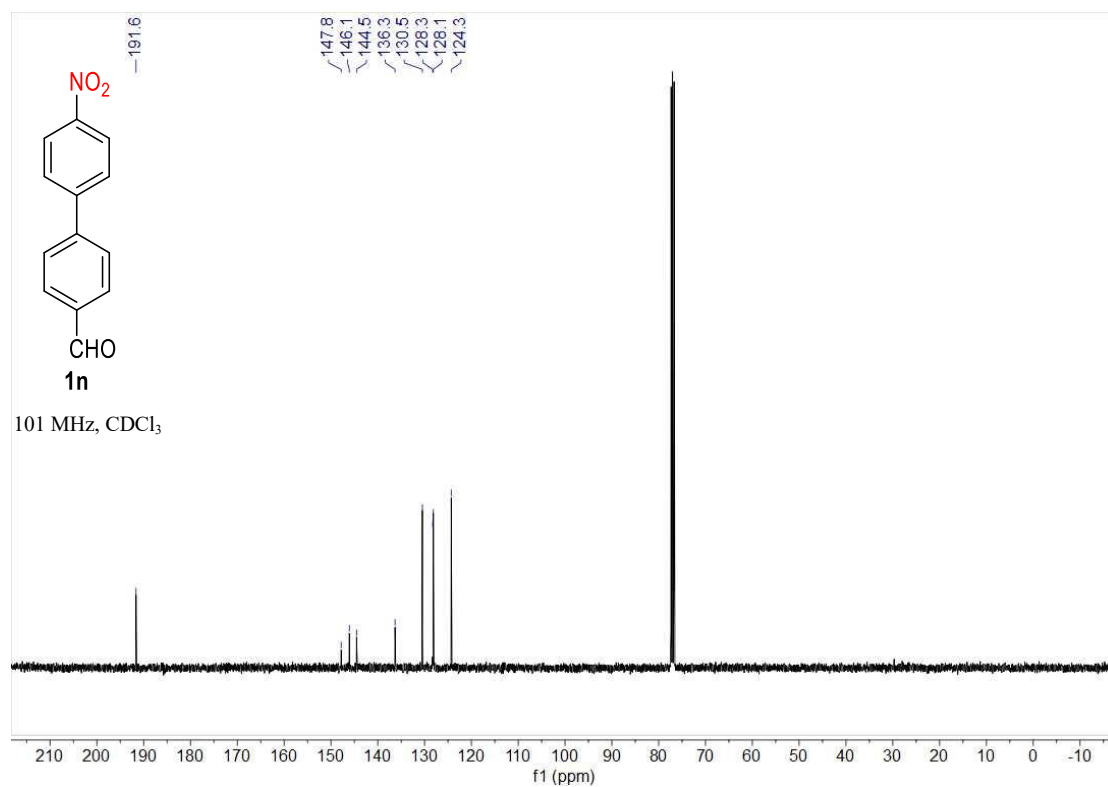

### 3-(4-nitrophenyl)thiophene (1o)

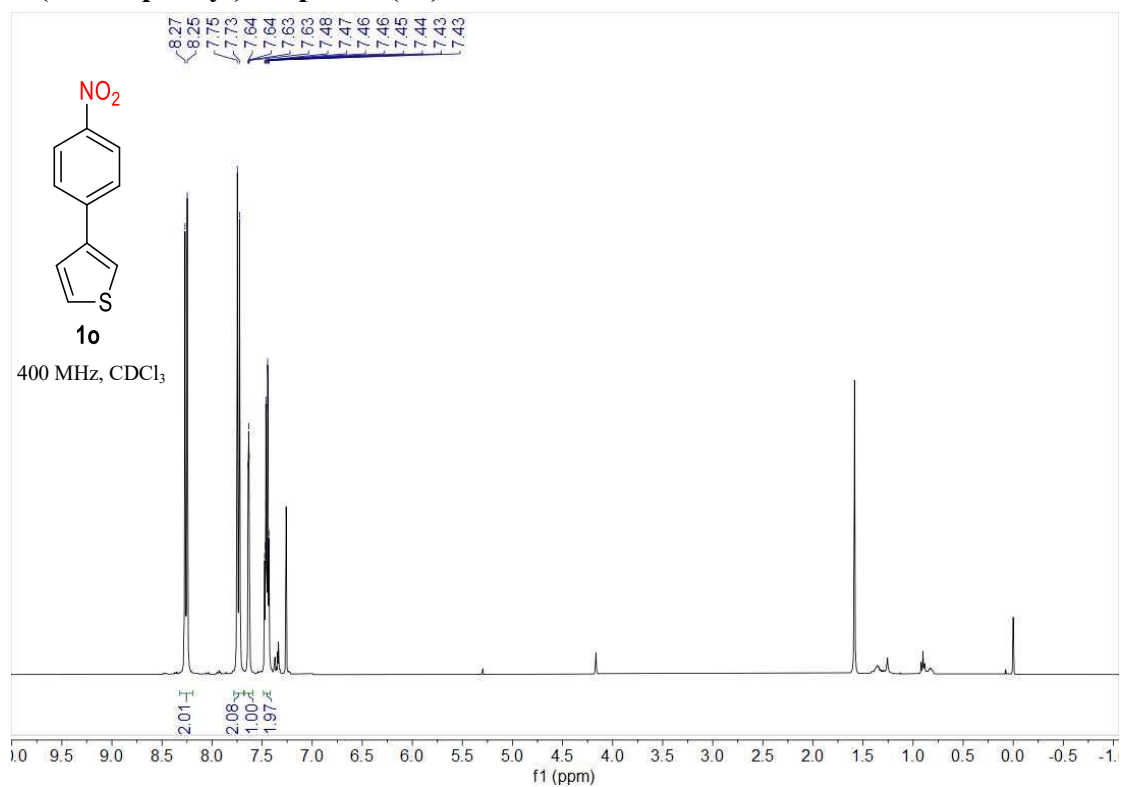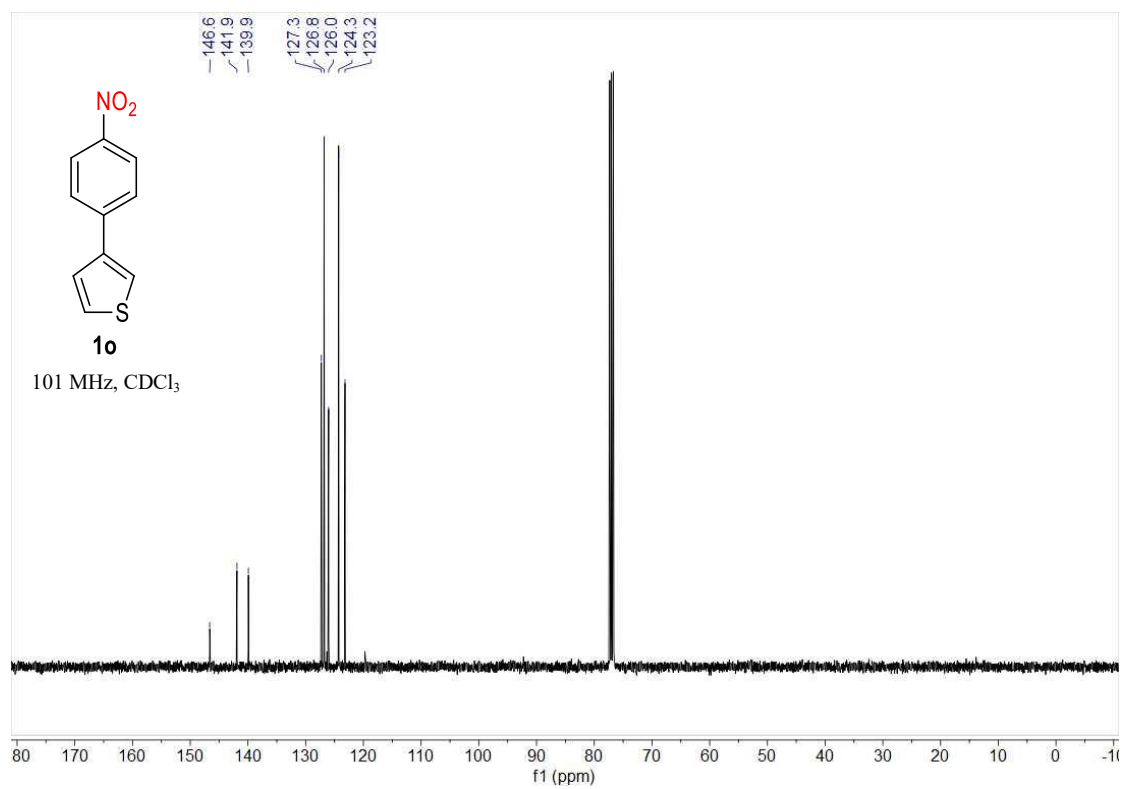



### 3-(4-nitrophenyl)furan (1p)

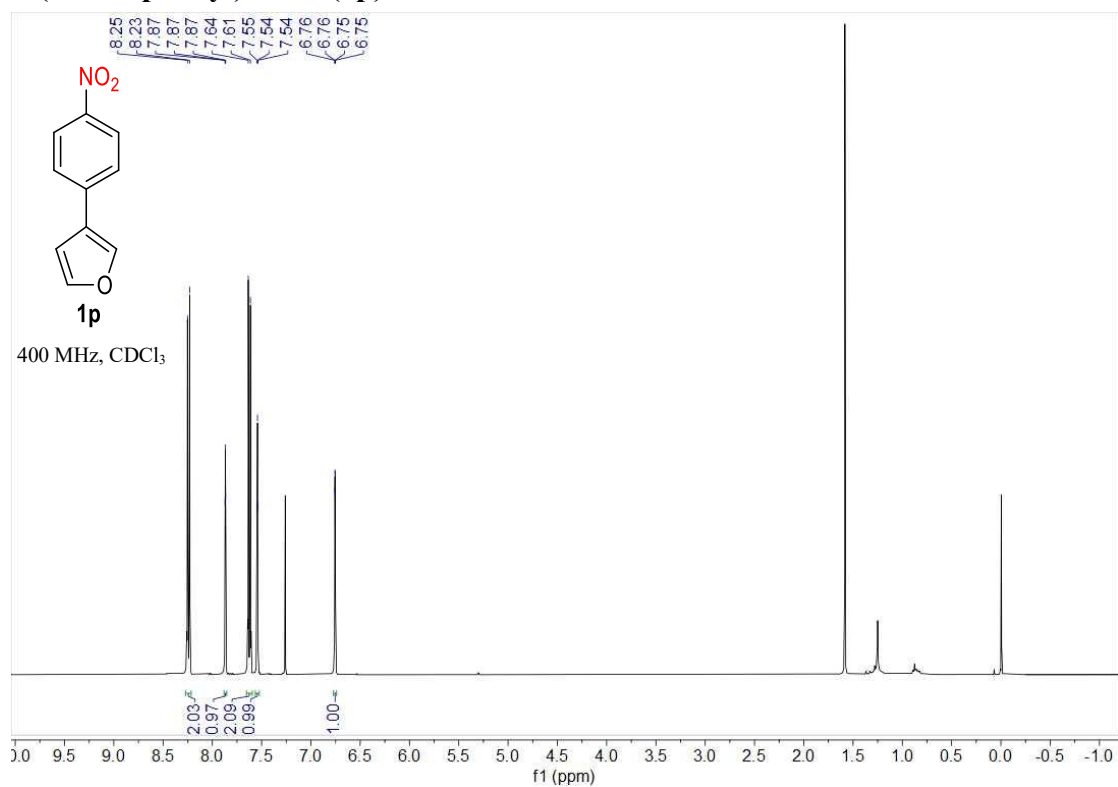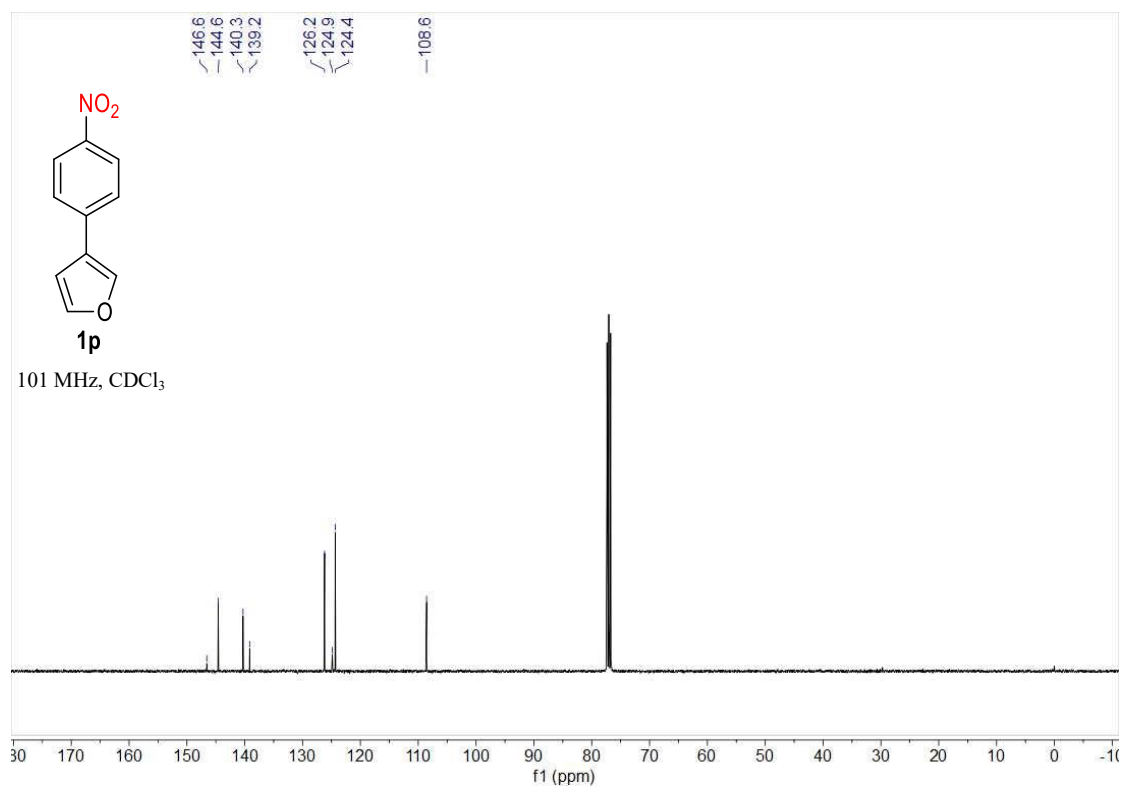

# 1-(4-nitrophenyl)naphthalene (1q)

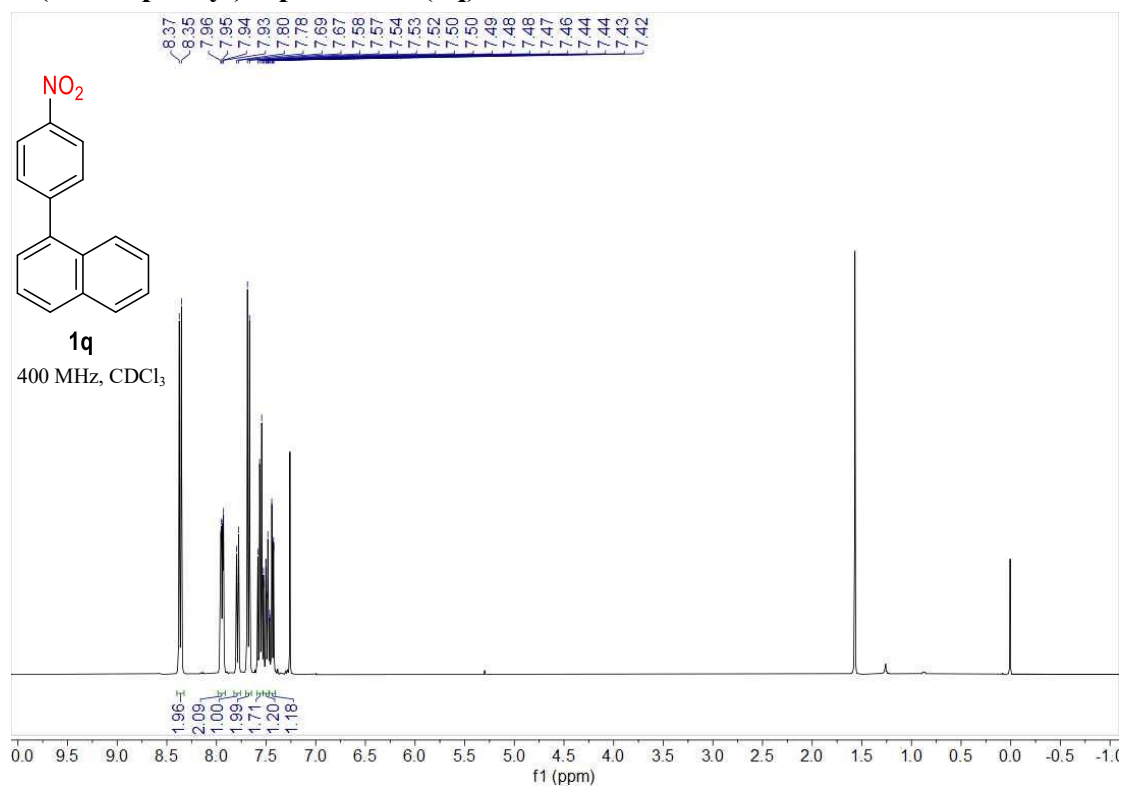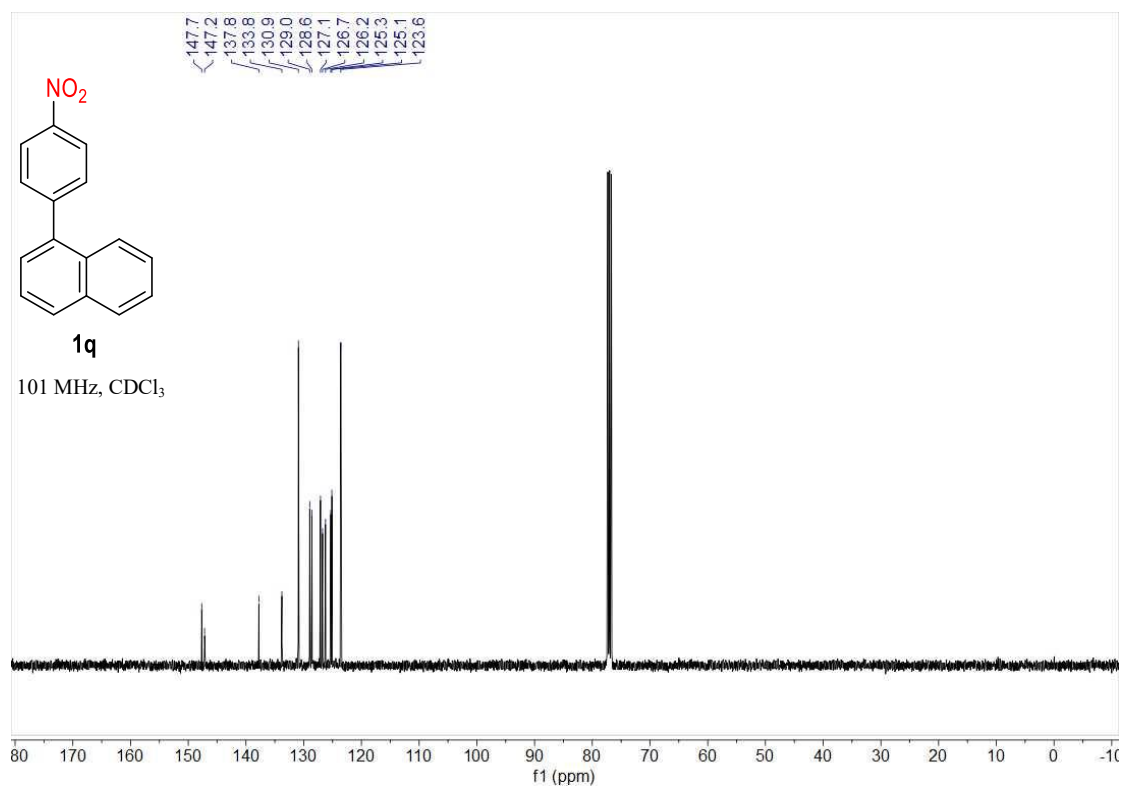

# 4'-nitro-[1,1'-biphenyl]-4-carbaldehyde (1r)

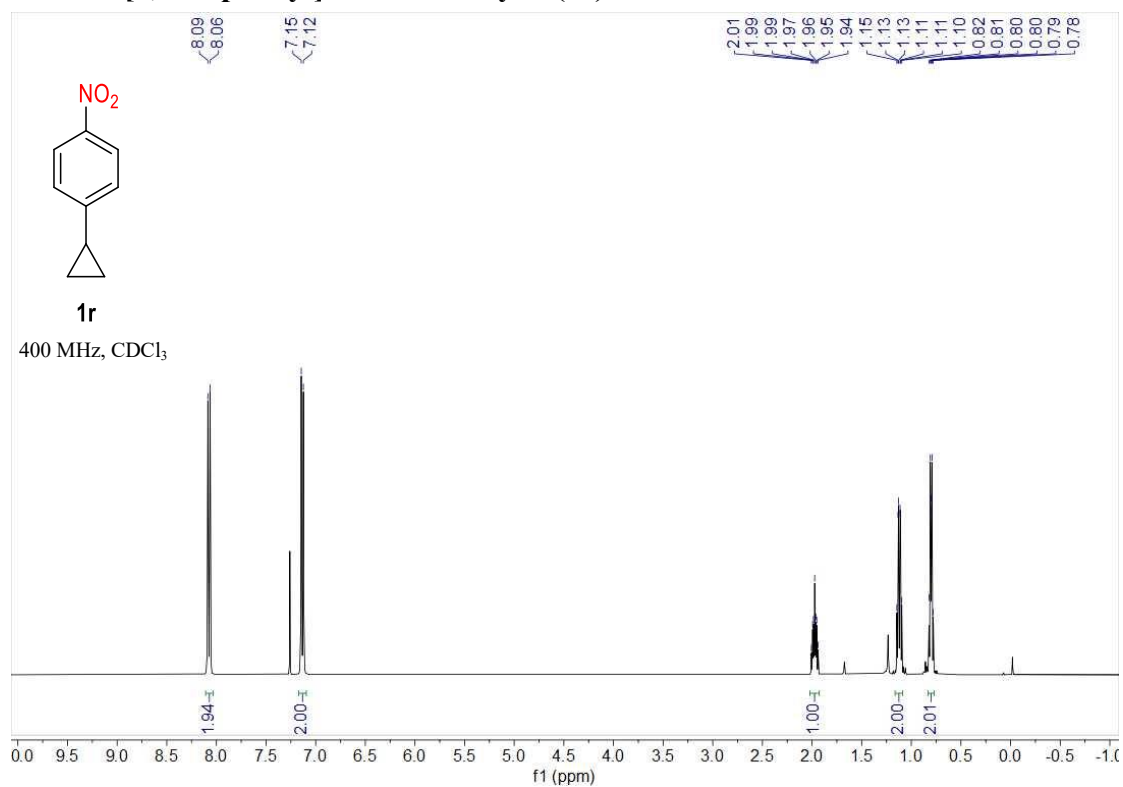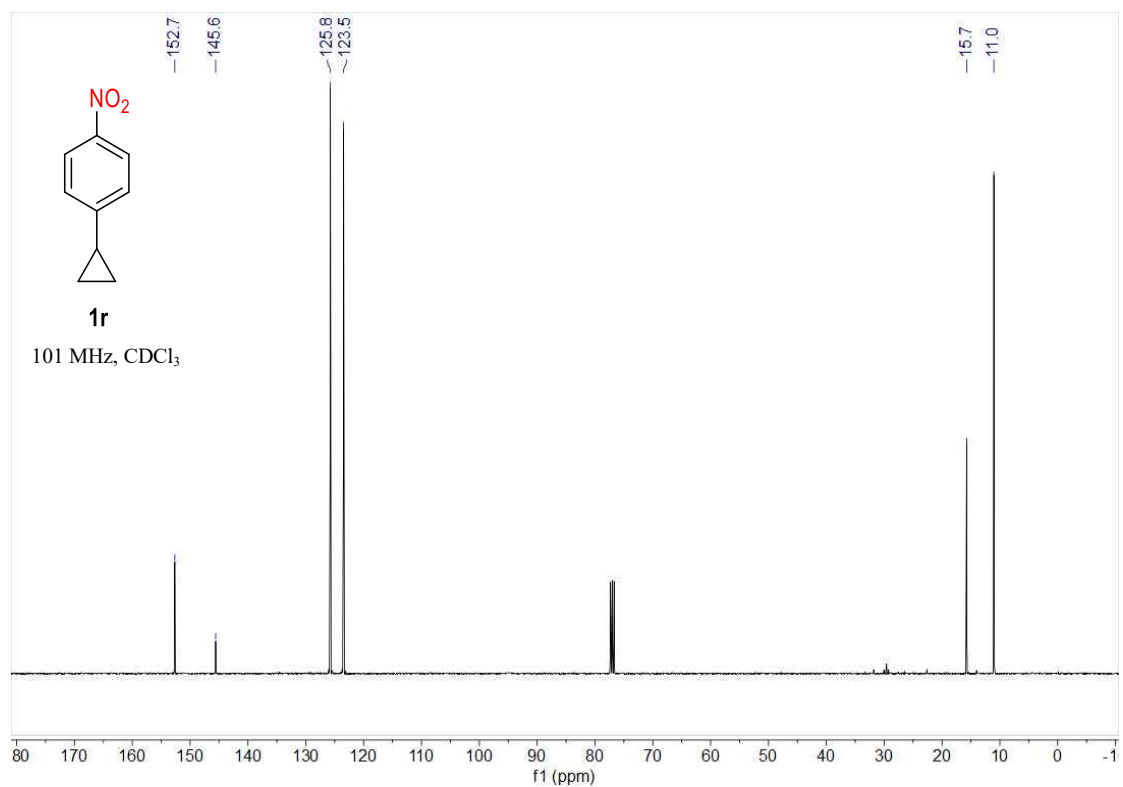

***N*-([1,1'-biphenyl]-4-yl)-4-methylbenzenesulfonamide (3a)**

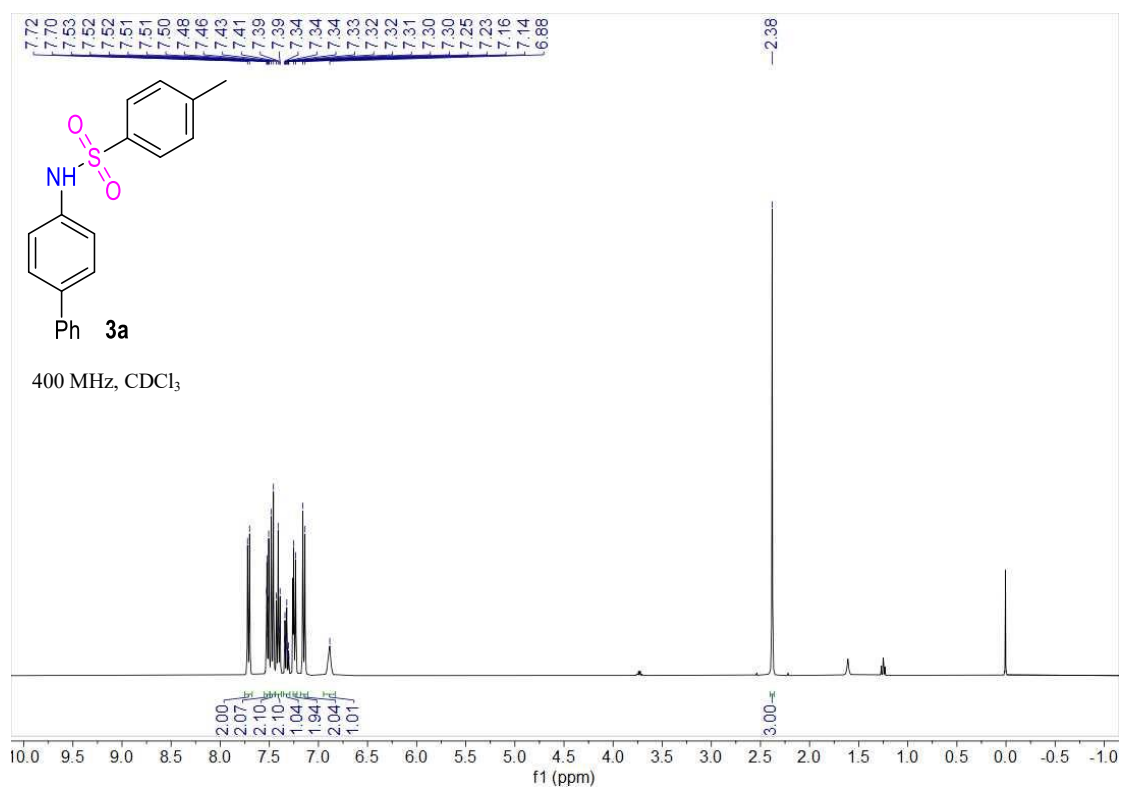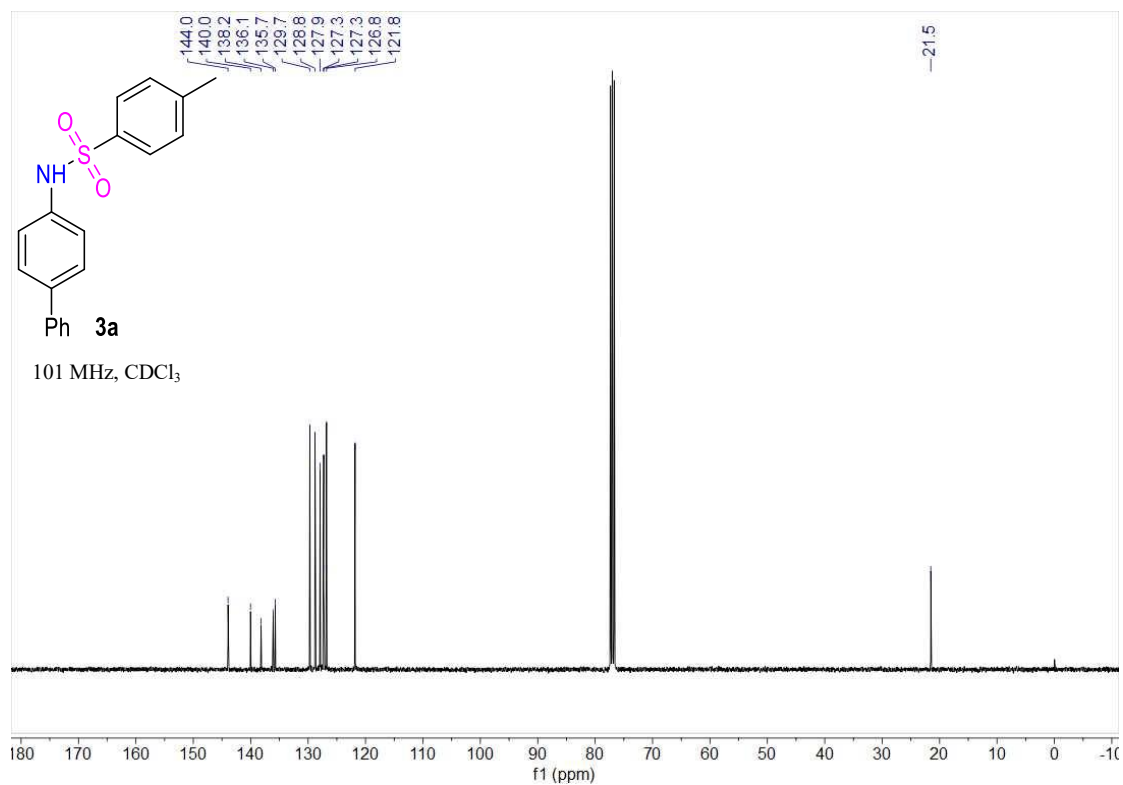

***N*-(4'-(*tert*-butyl)-[1,1'-biphenyl]-4-yl)-4-methylbenzenesulfonamide (3b)**

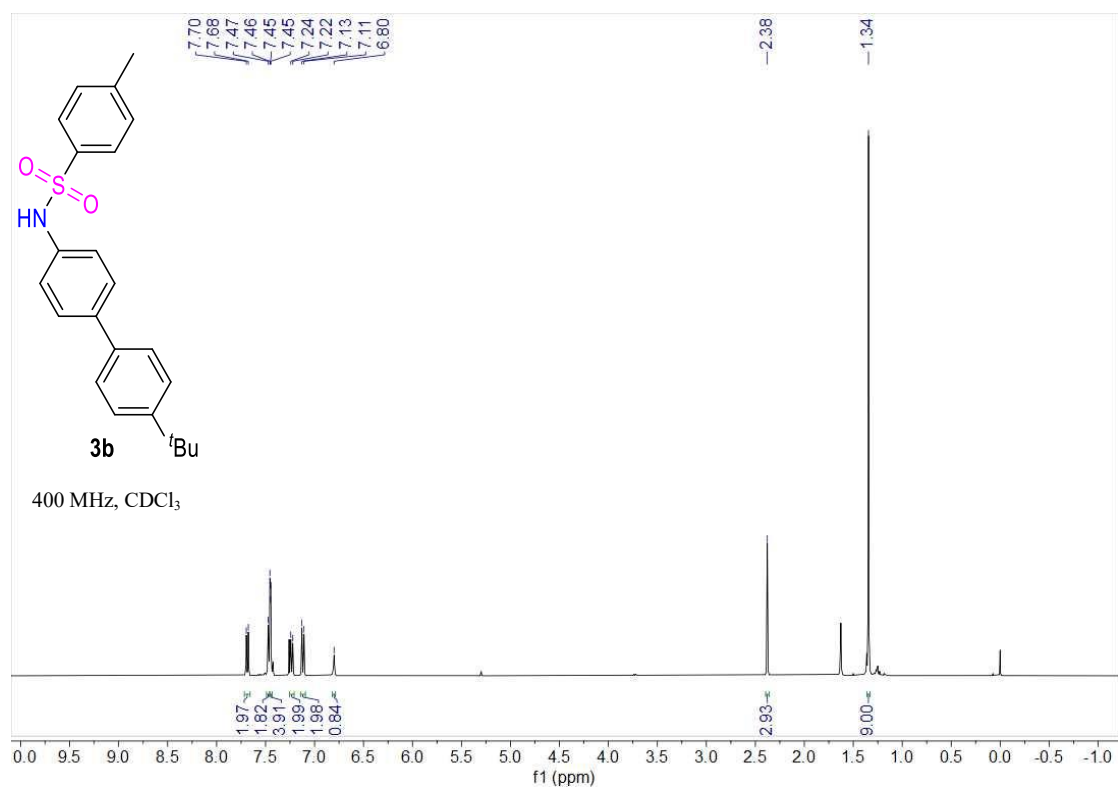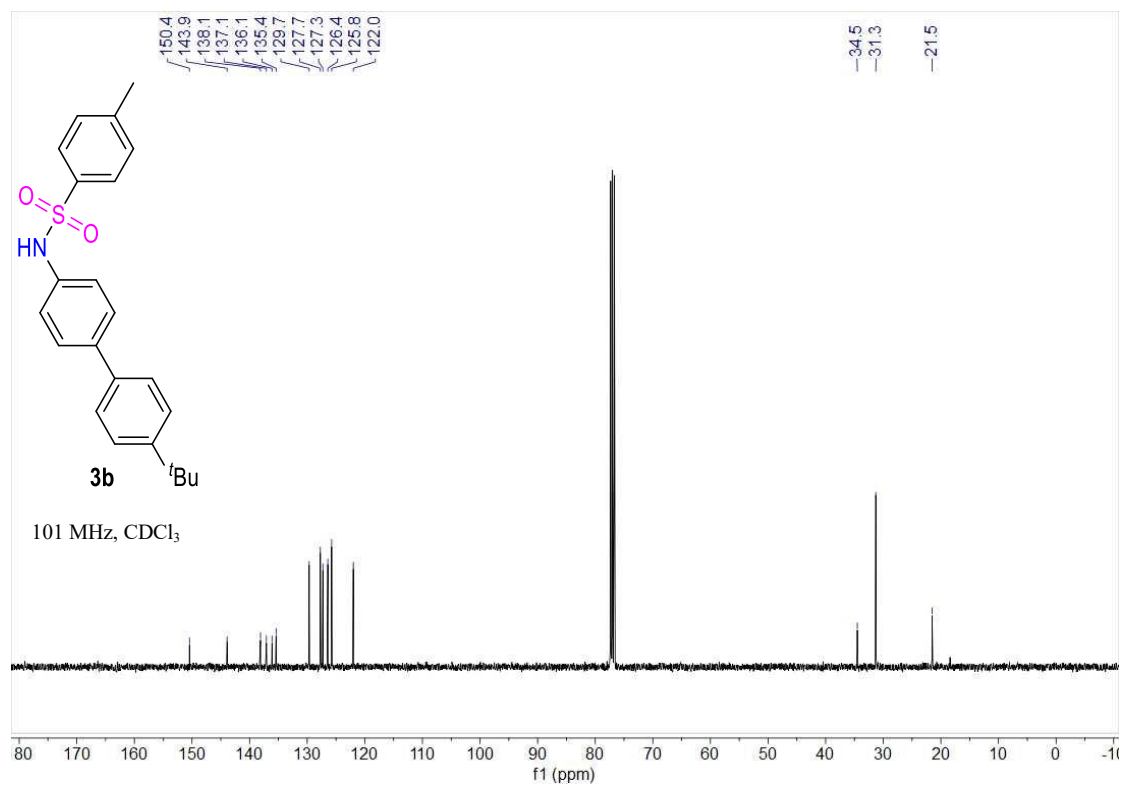

***N*-(4'-methoxy-[1,1'-biphenyl]-4-yl)-4-methylbenzenesulfonamide (3c)**

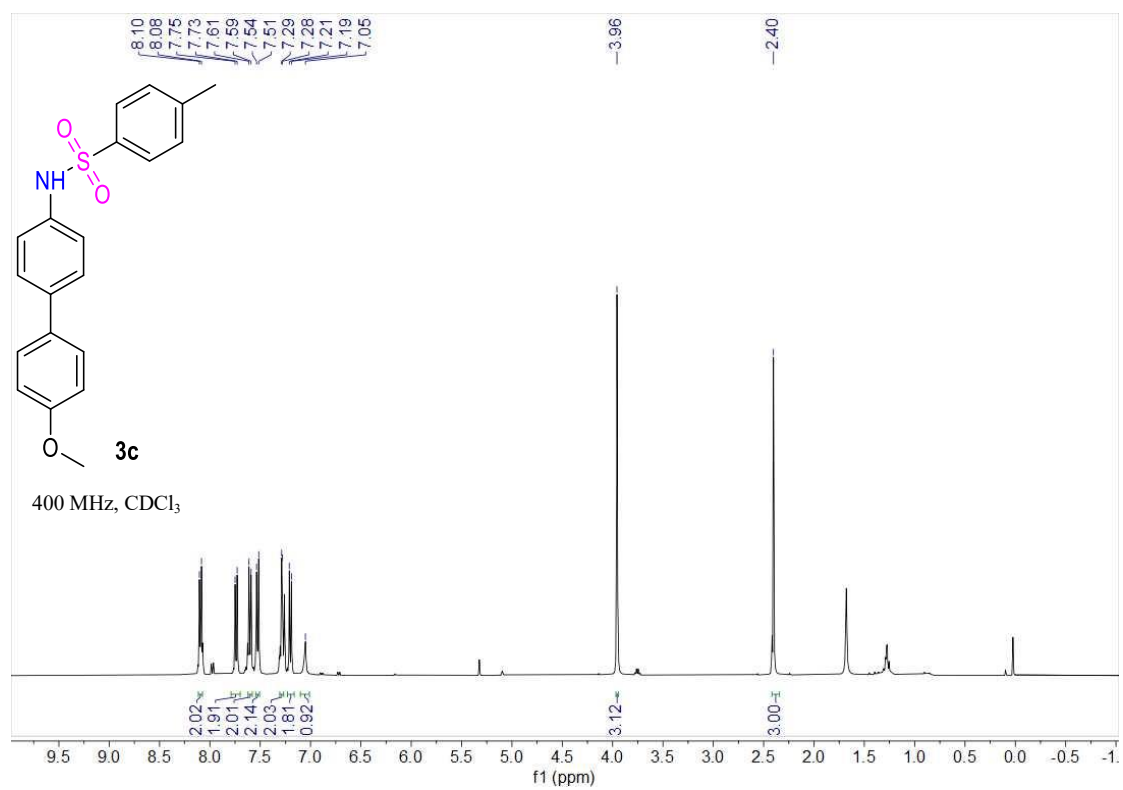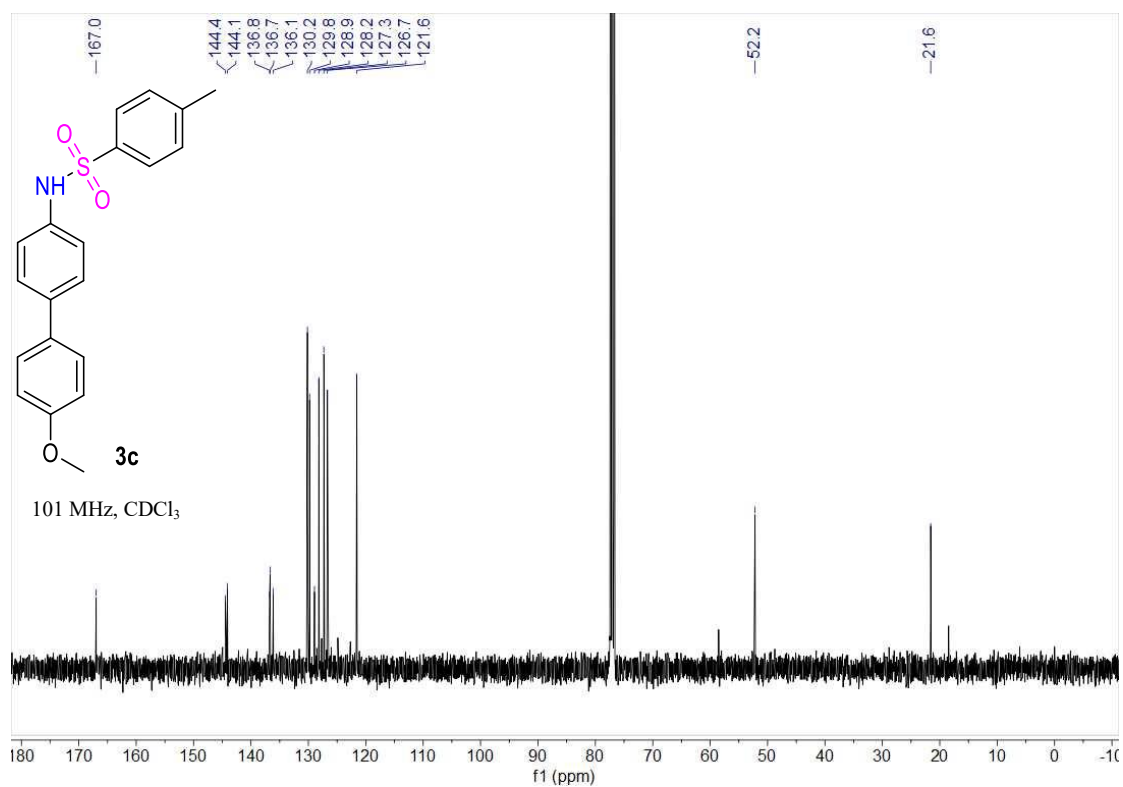

**4-methyl-N-(3'-(trifluoromethyl)-[1,1'-biphenyl]-4-yl)benzenesulfonamide(3d)**

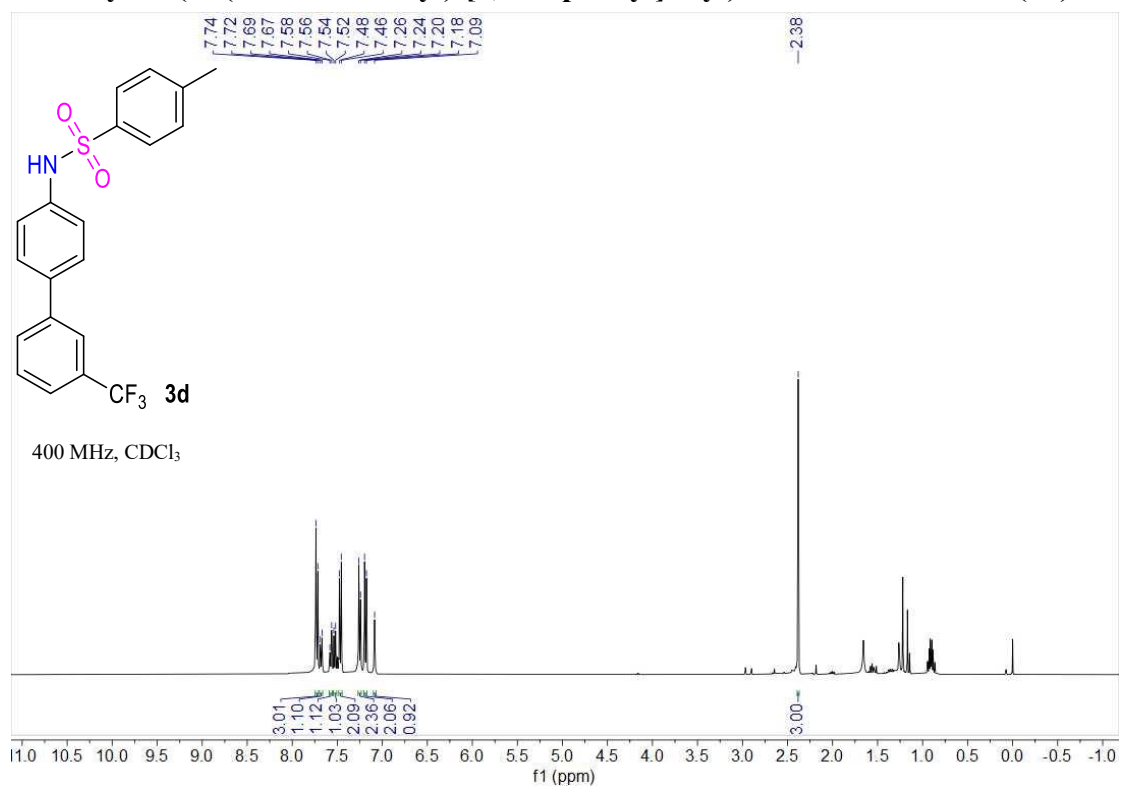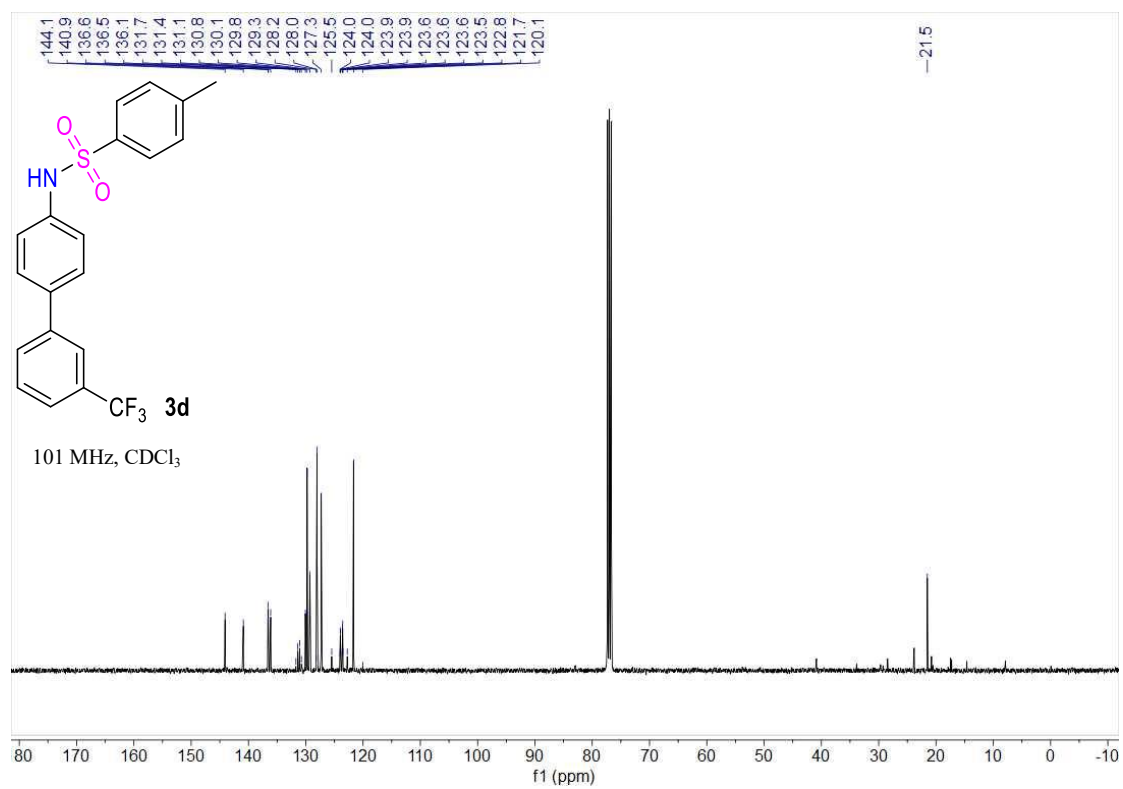

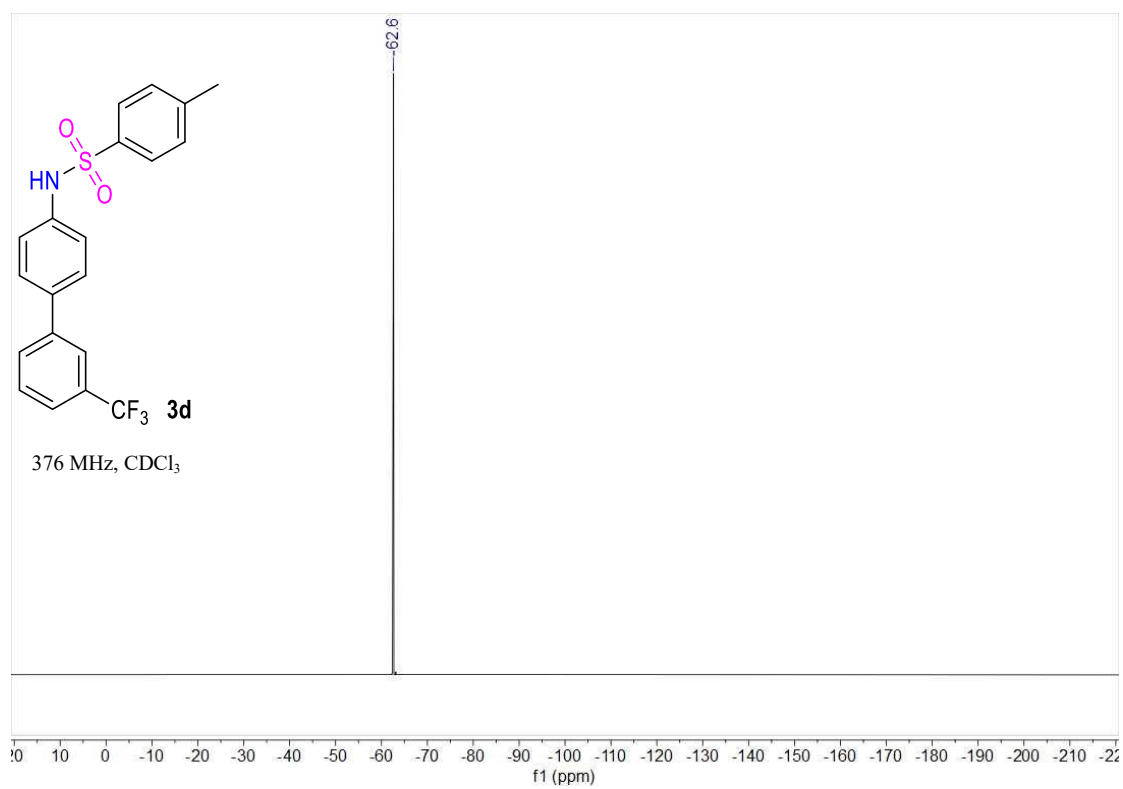



***N*-(4'-cyano-[1,1'-biphenyl]-4-yl)-4-methylbenzenesulfonamide (3e)**

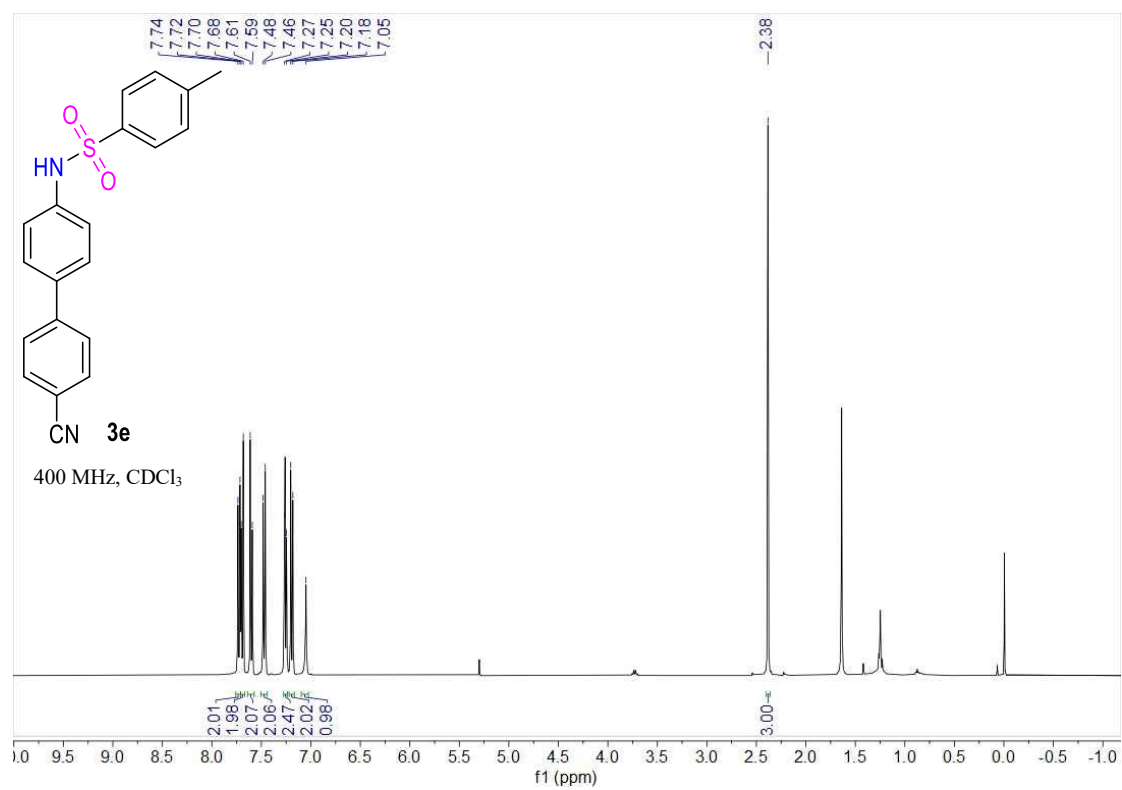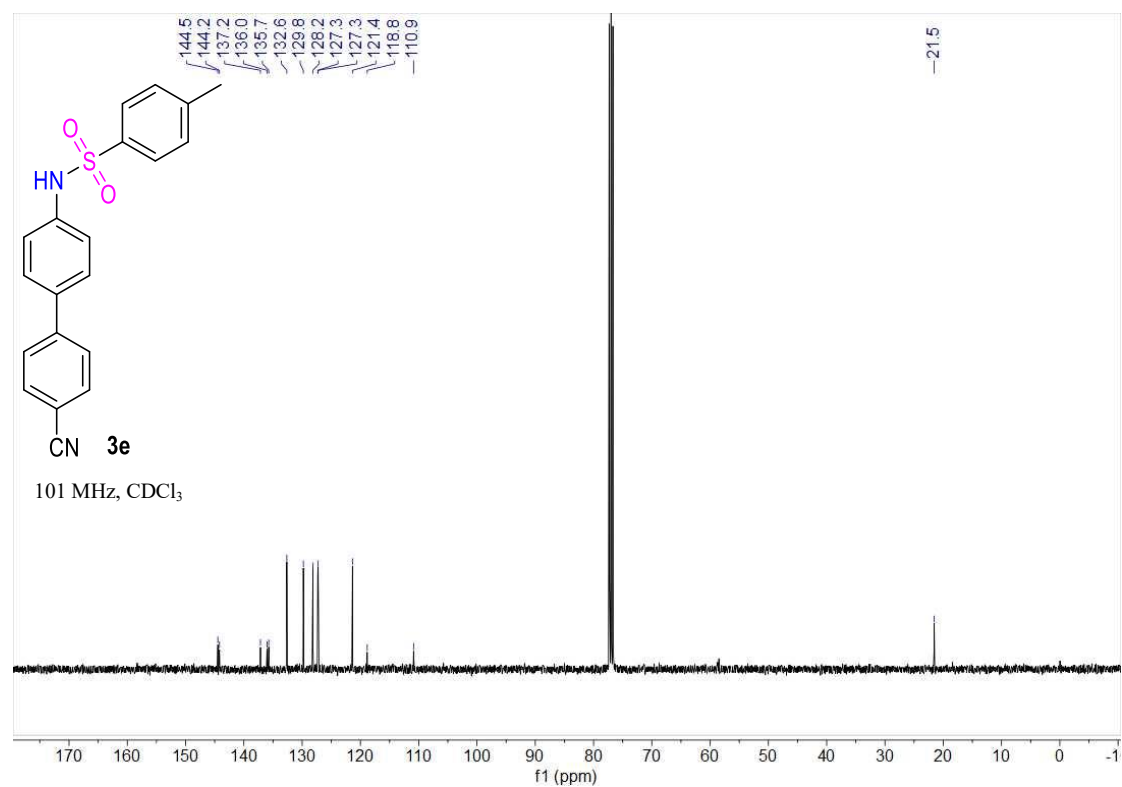

**N-(2'-fluoro-[1,1'-biphenyl]-4-yl)-4-methylbenzenesulfonamide (3f)**

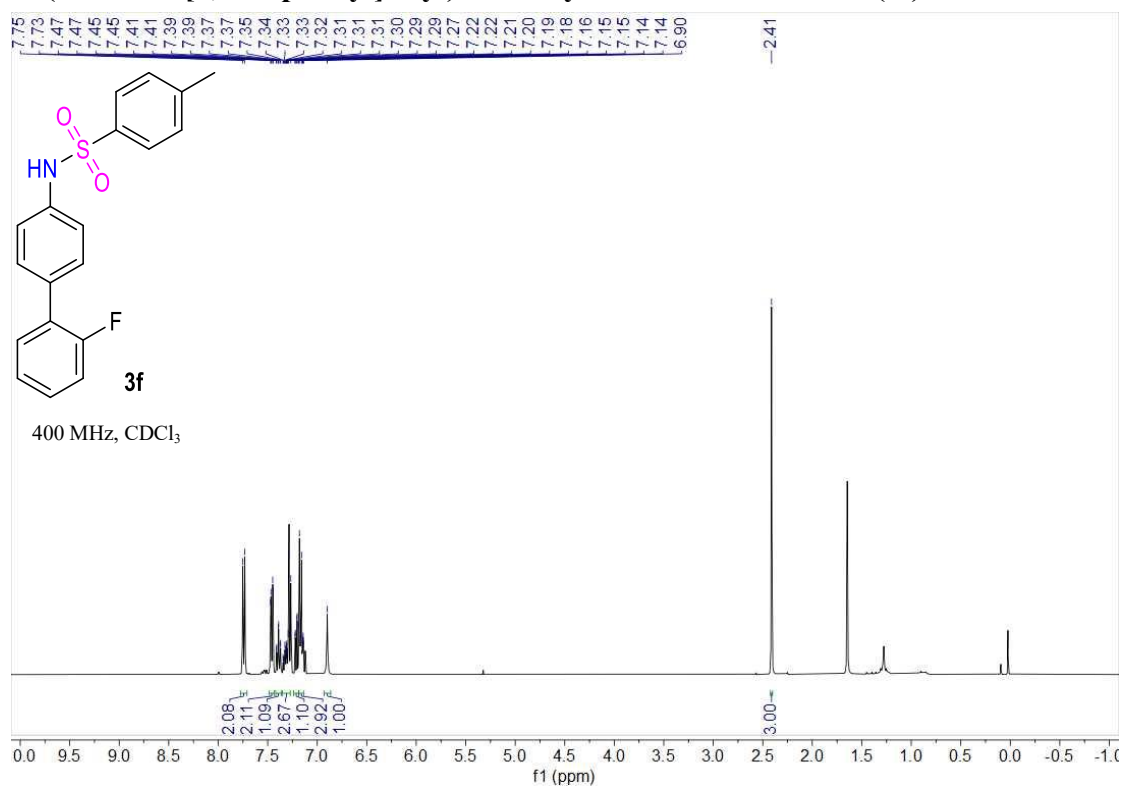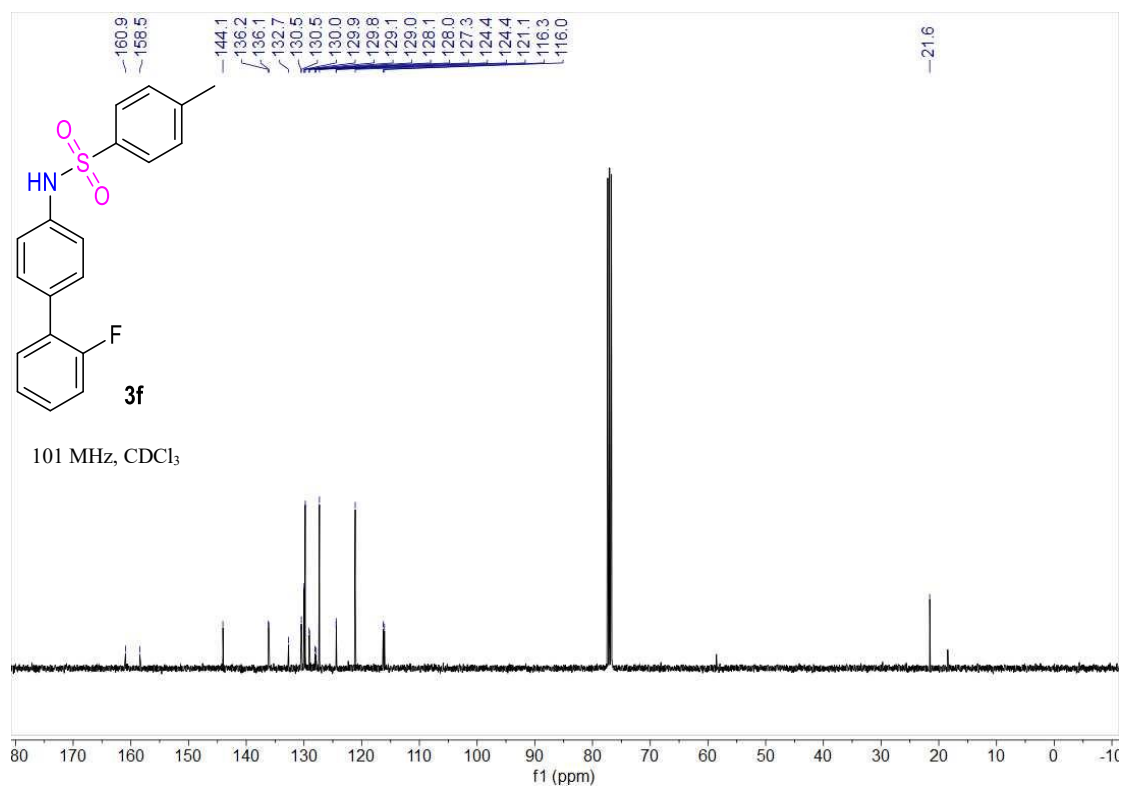

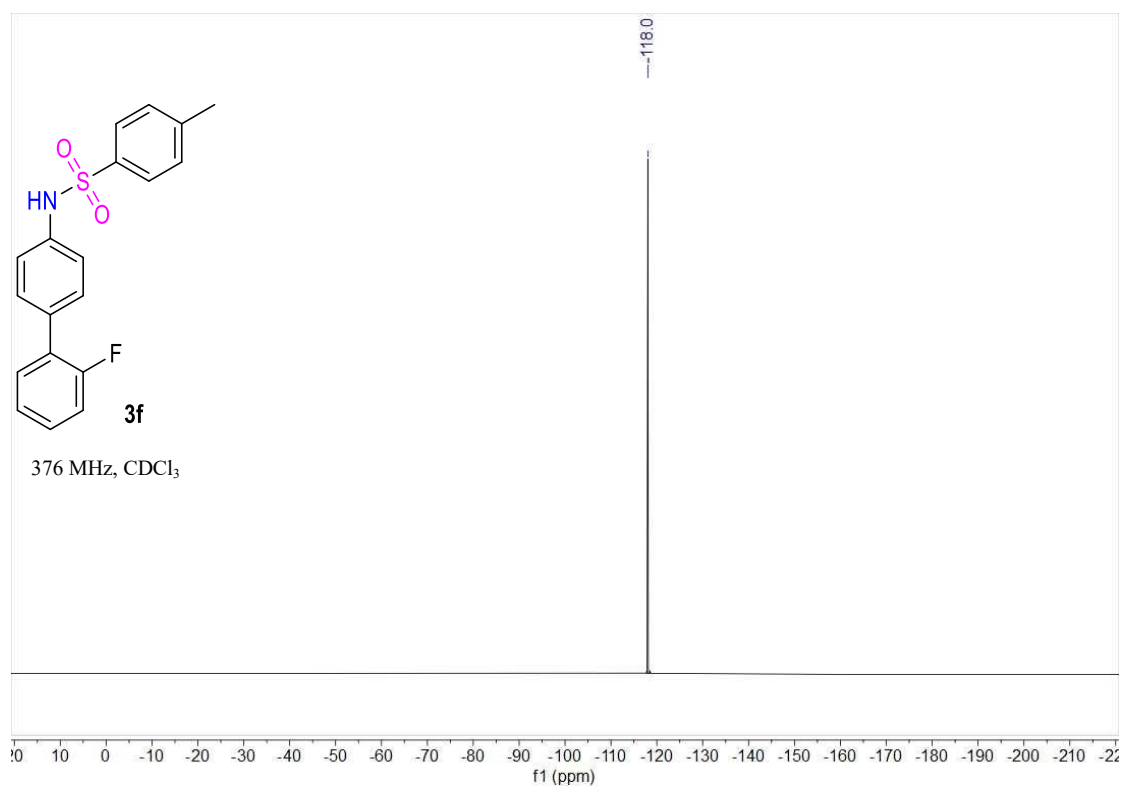

***N*-(2'-bromo-[1,1'-biphenyl]-4-yl)-4-methylbenzenesulfonamide (3g)**

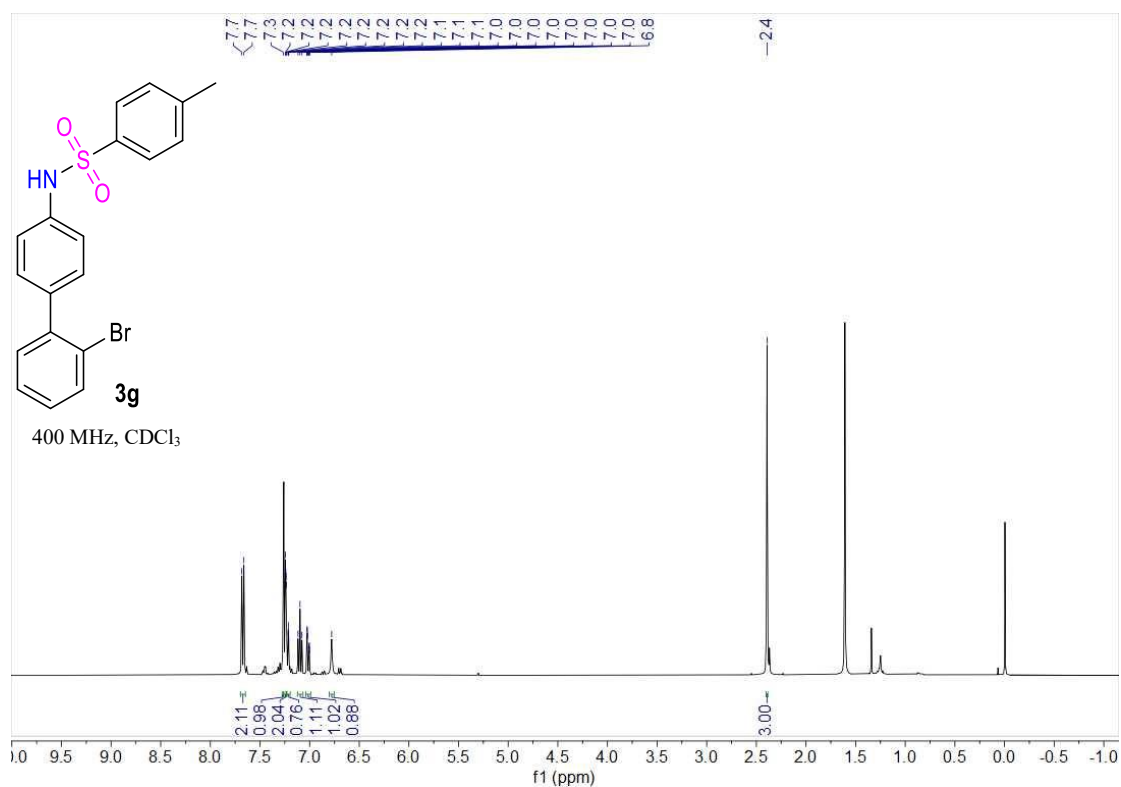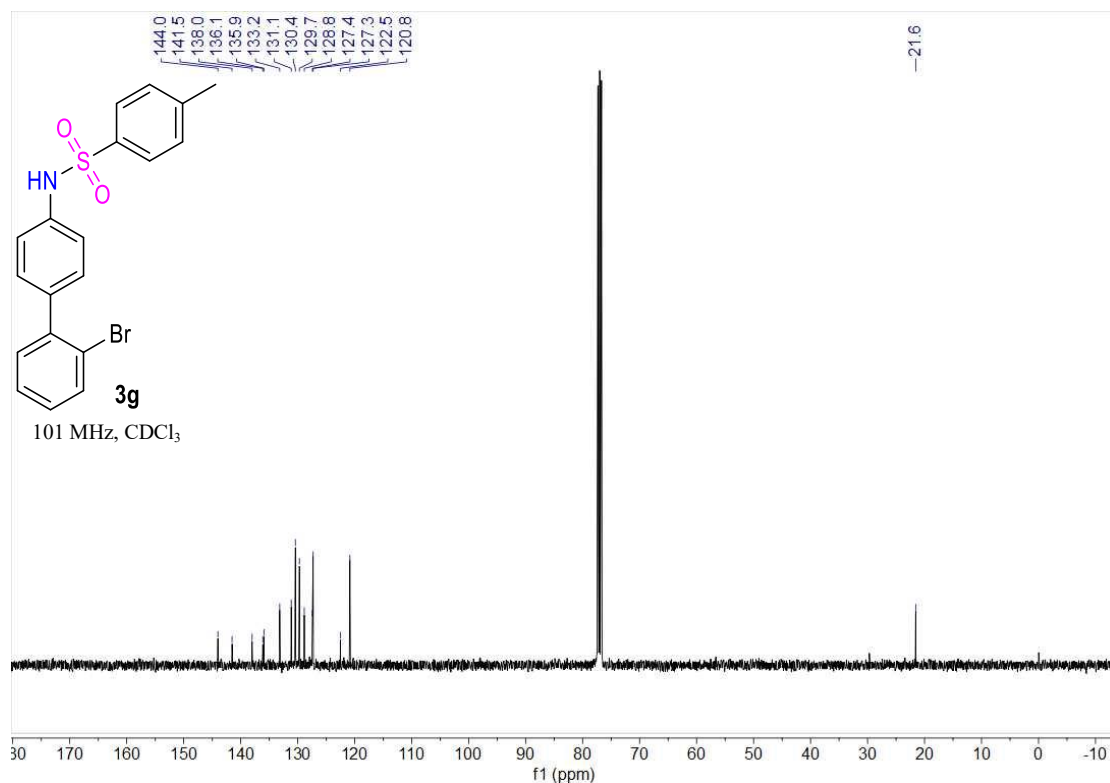

***N*-(3'-fluoro-[1,1'-biphenyl]-4-yl)-4-methylbenzenesulfonamide (3h)**

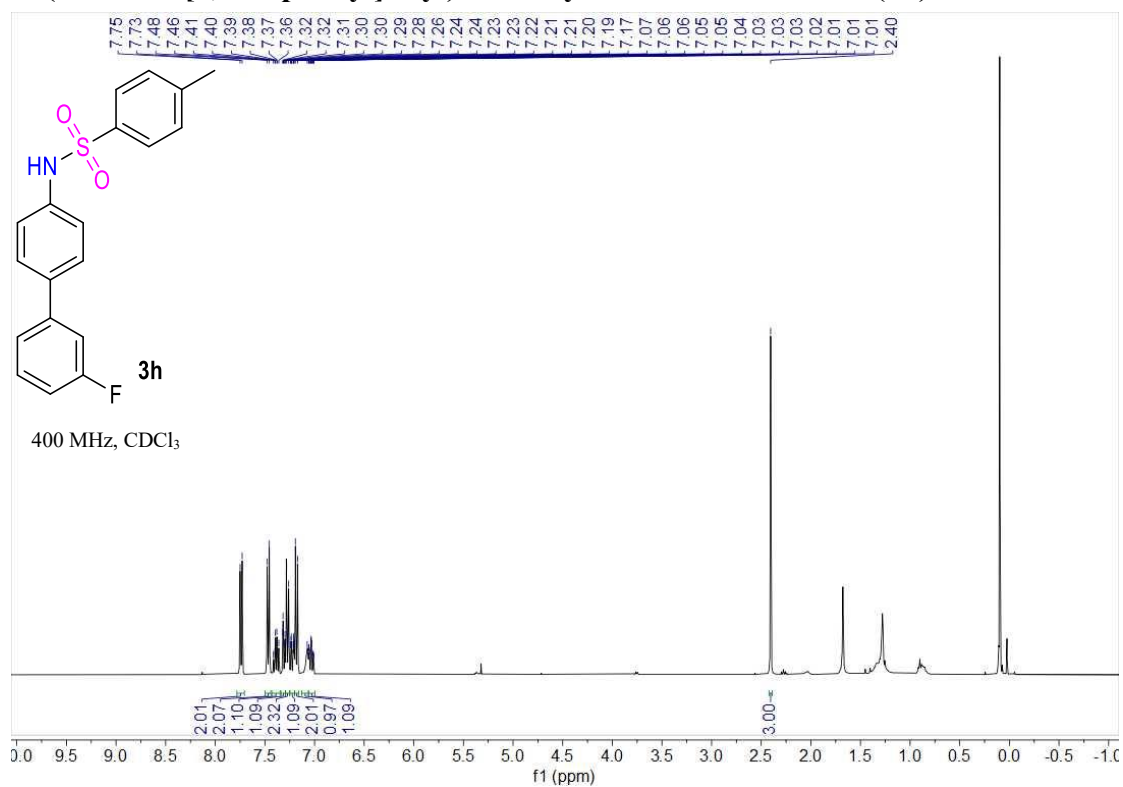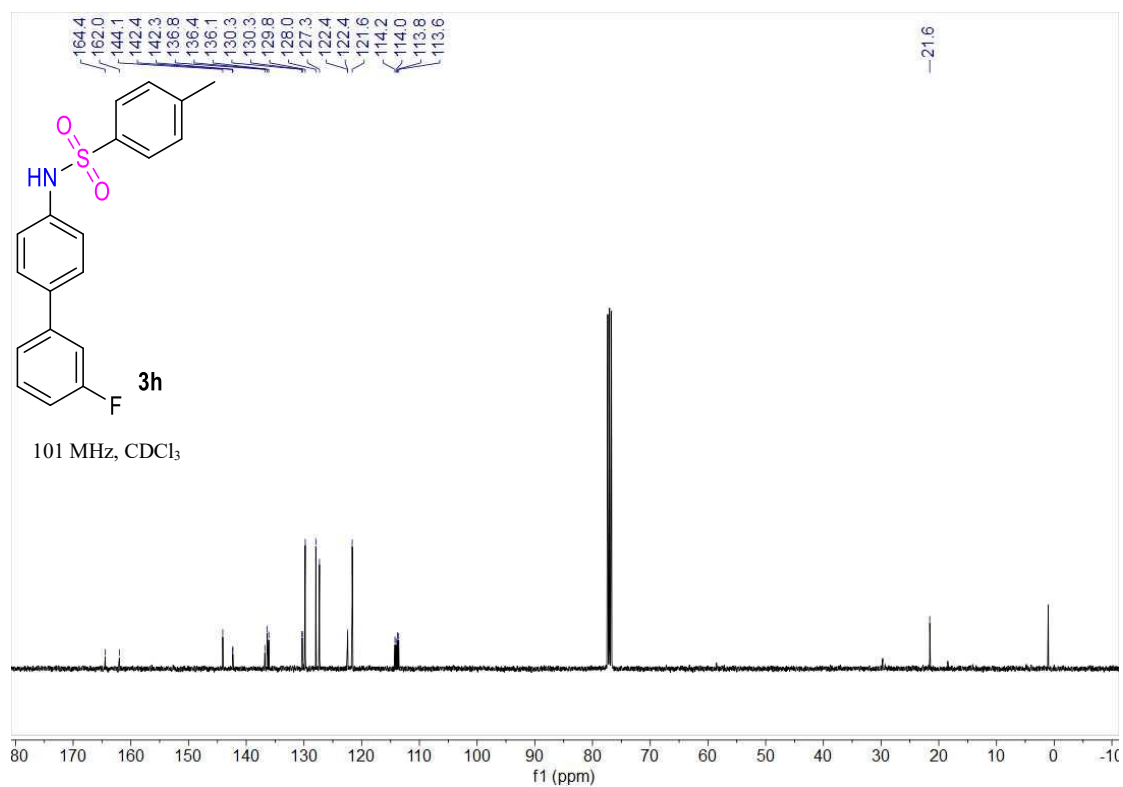

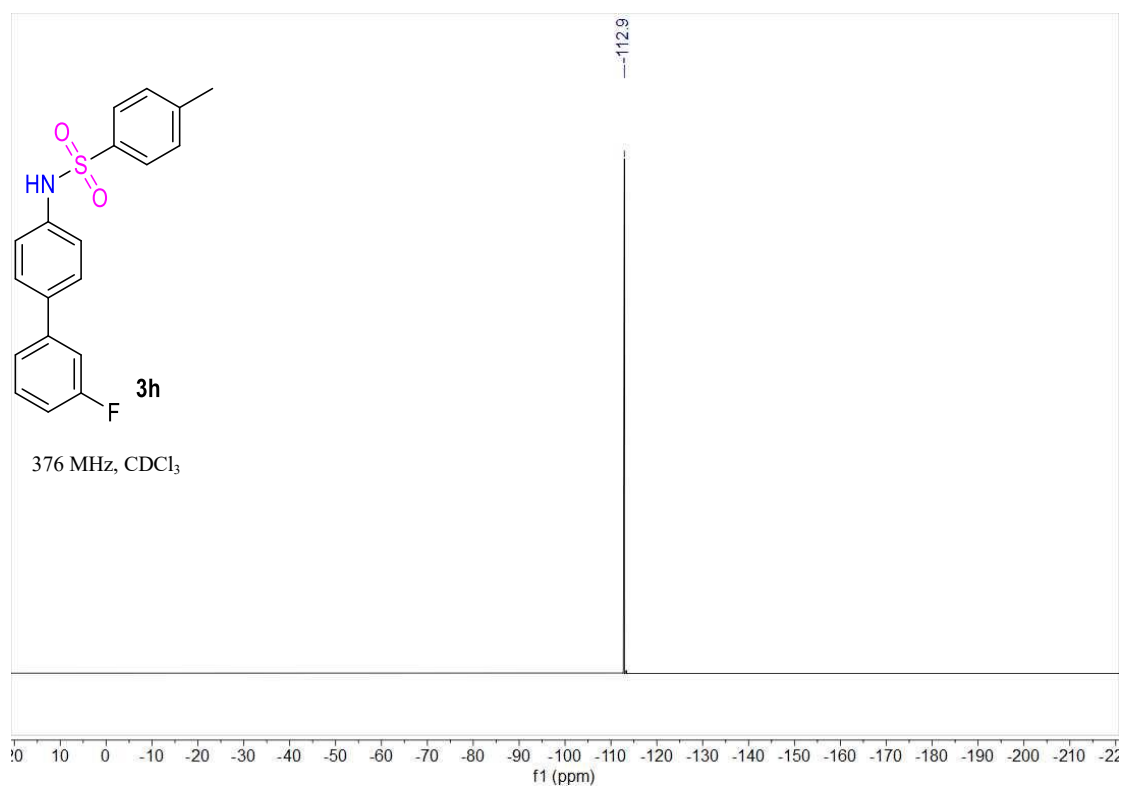

***N*-(3'-chloro-[1,1'-biphenyl]-4-yl)-4-methylbenzenesulfonamide (3i)**

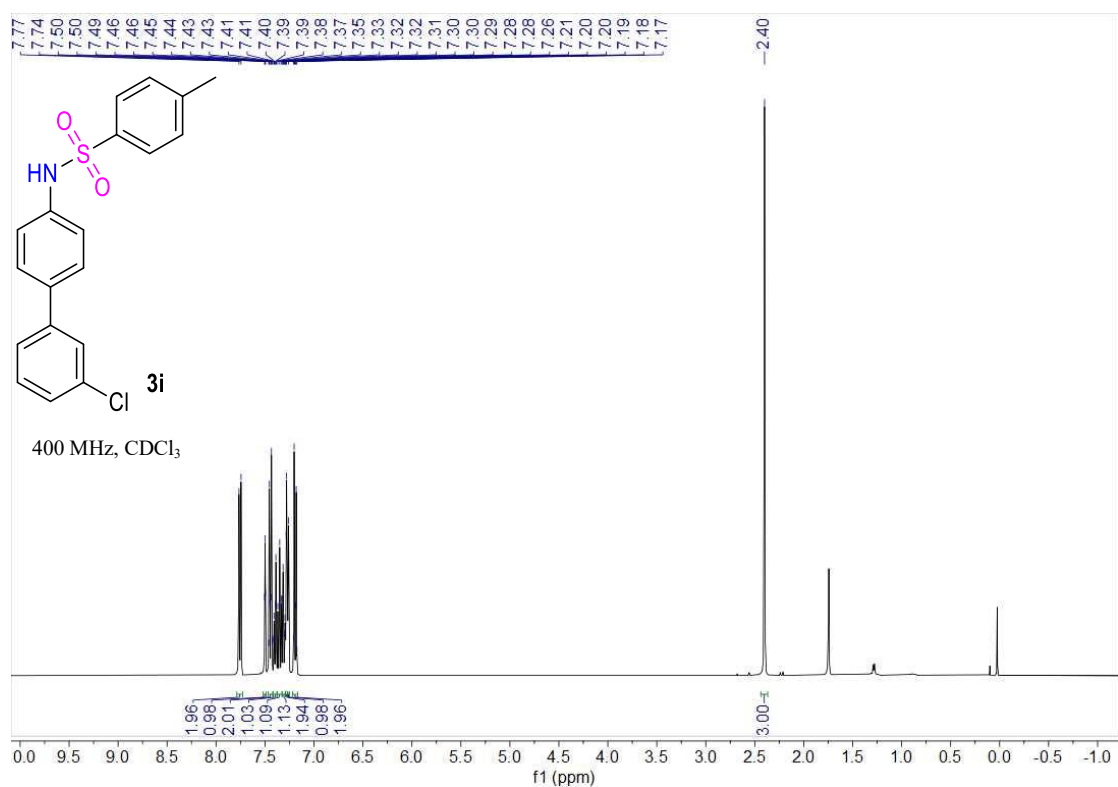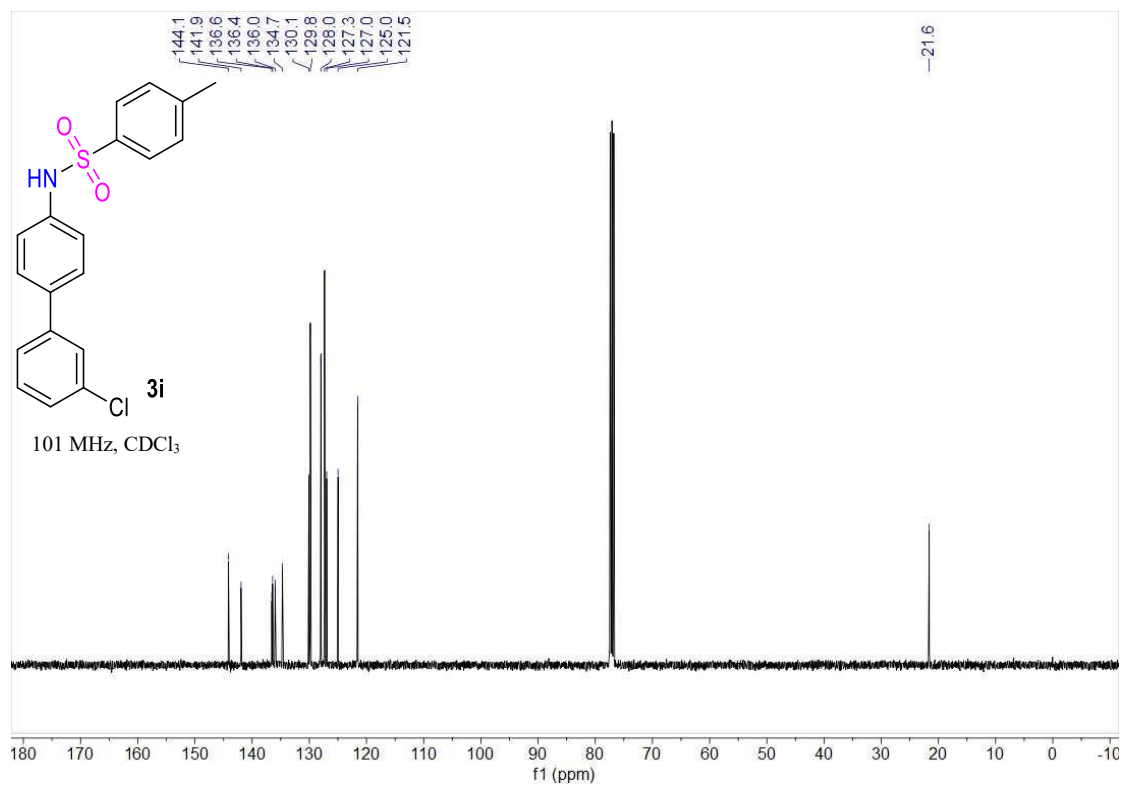

***N*-(4'-fluoro-[1,1'-biphenyl]-4-yl)-4-methylbenzenesulfonamide (3j)**

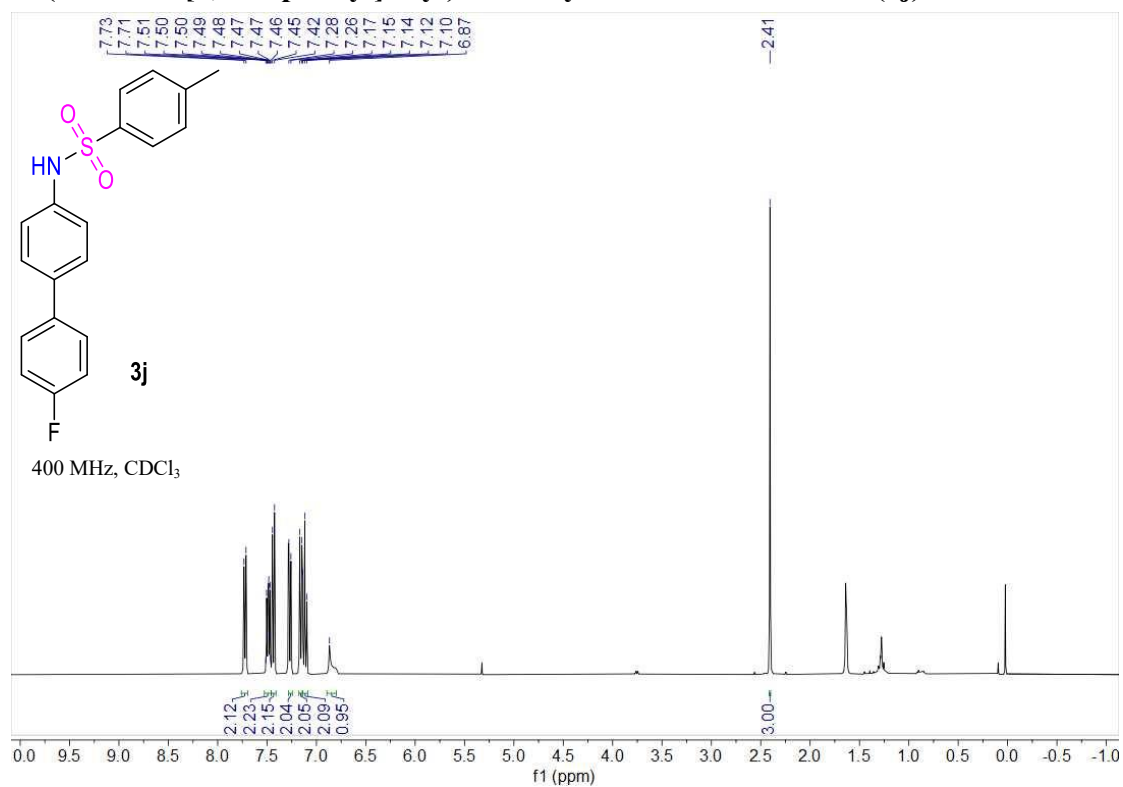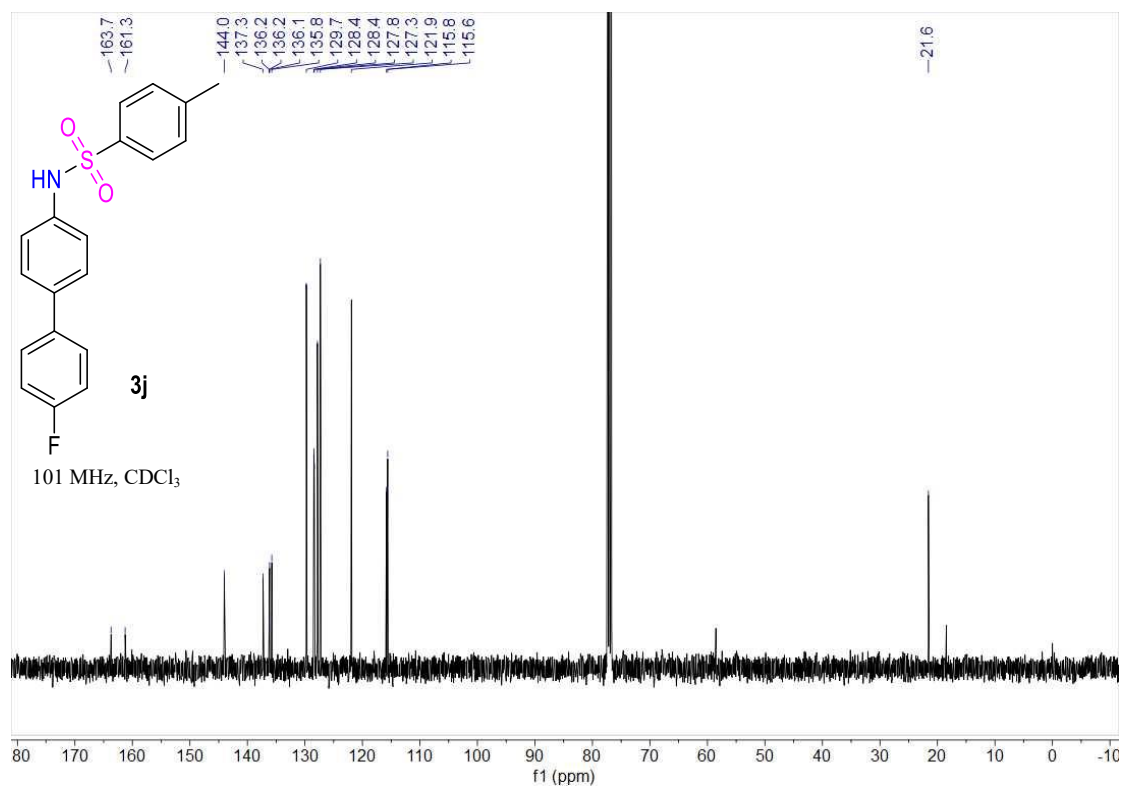



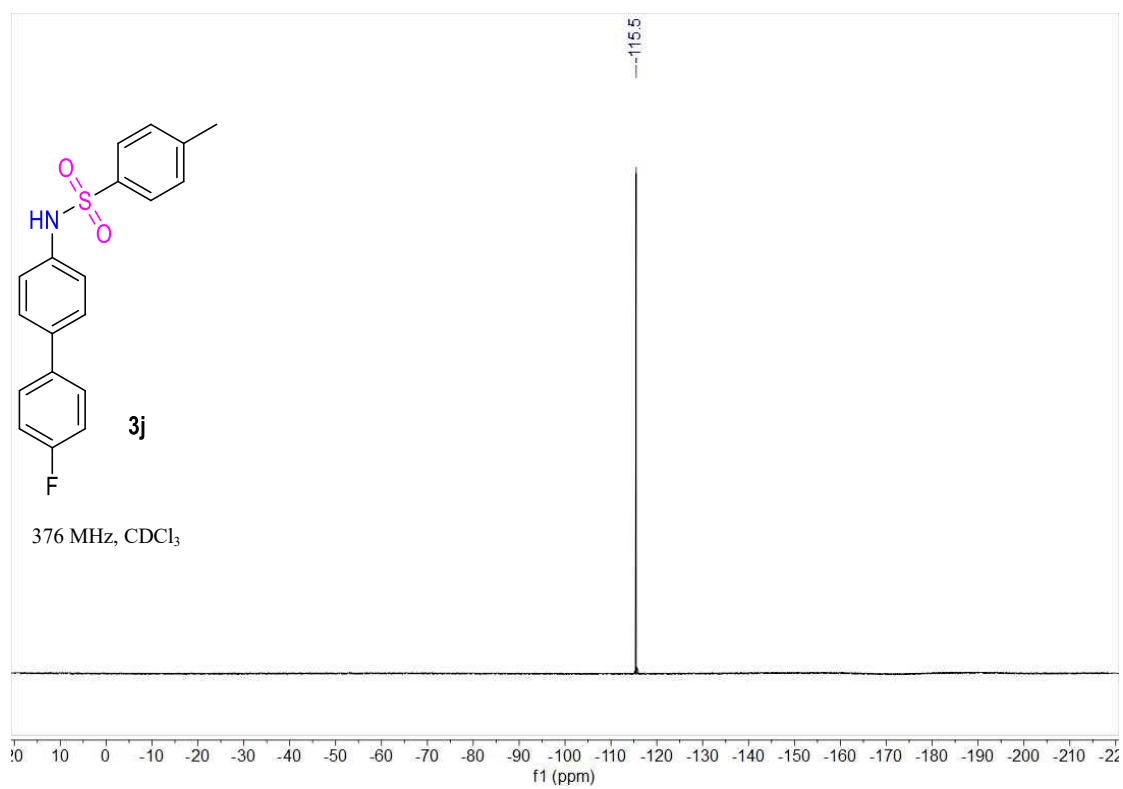

***N*-(4'-bromo-[1,1'-biphenyl]-4-yl)-4-methylbenzenesulfonamide (3k)**

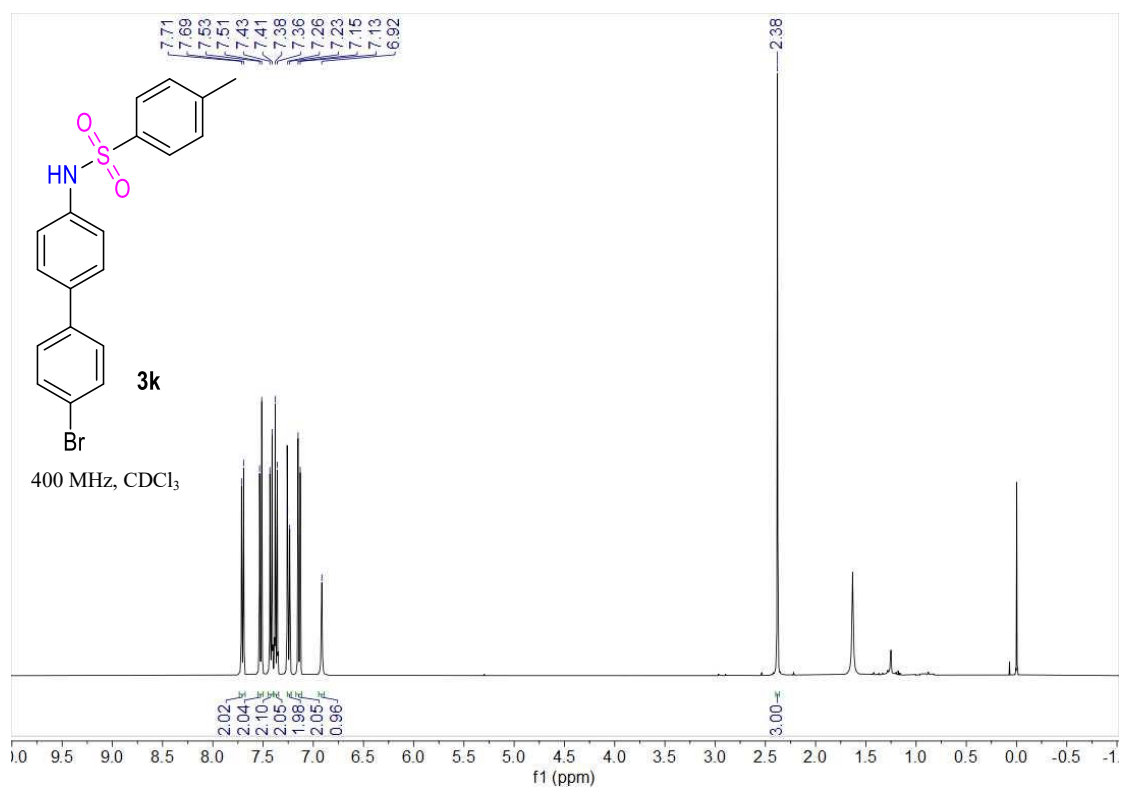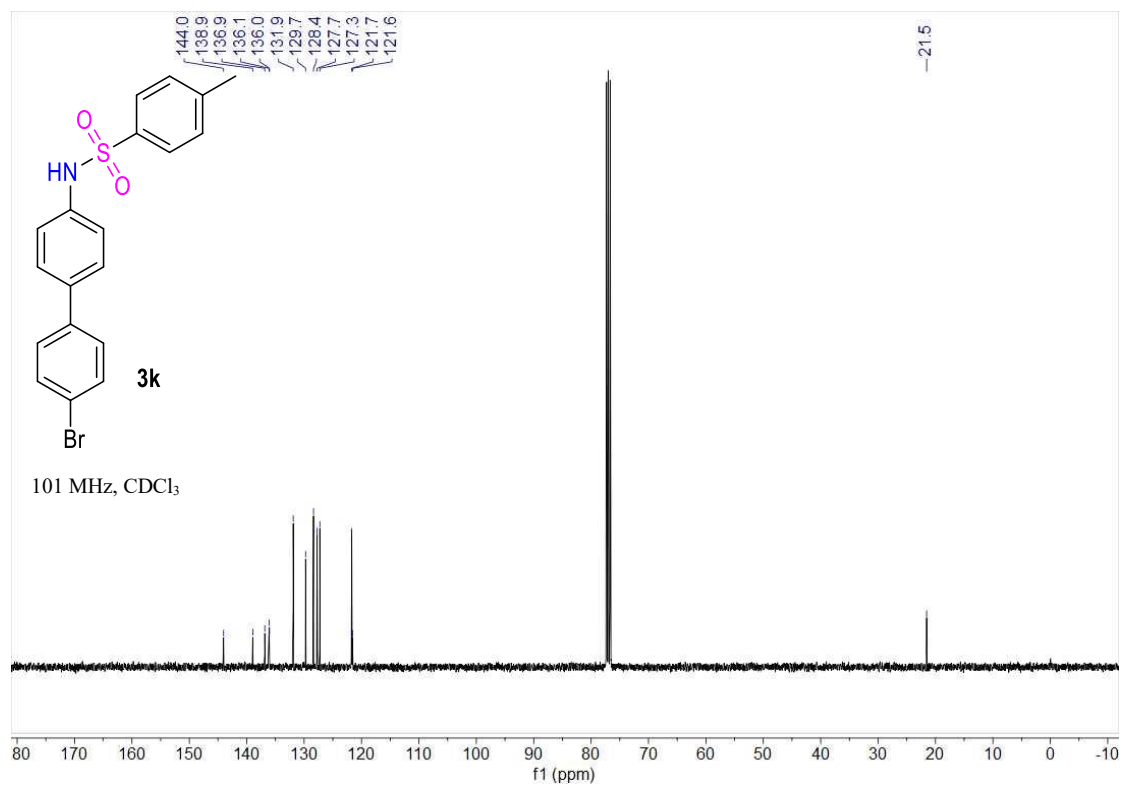

**methyl 4'-((4-methylphenyl)sulfonamido)-[1,1'-biphenyl]-4-carboxylate (3l)**

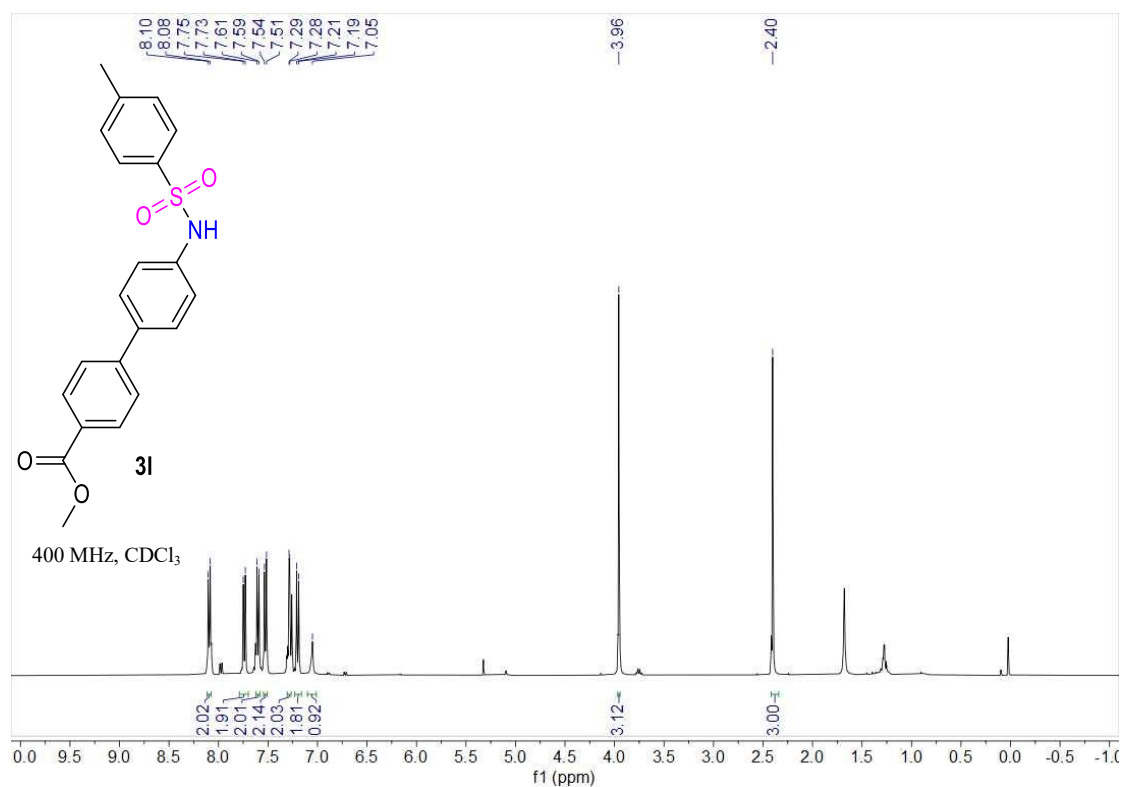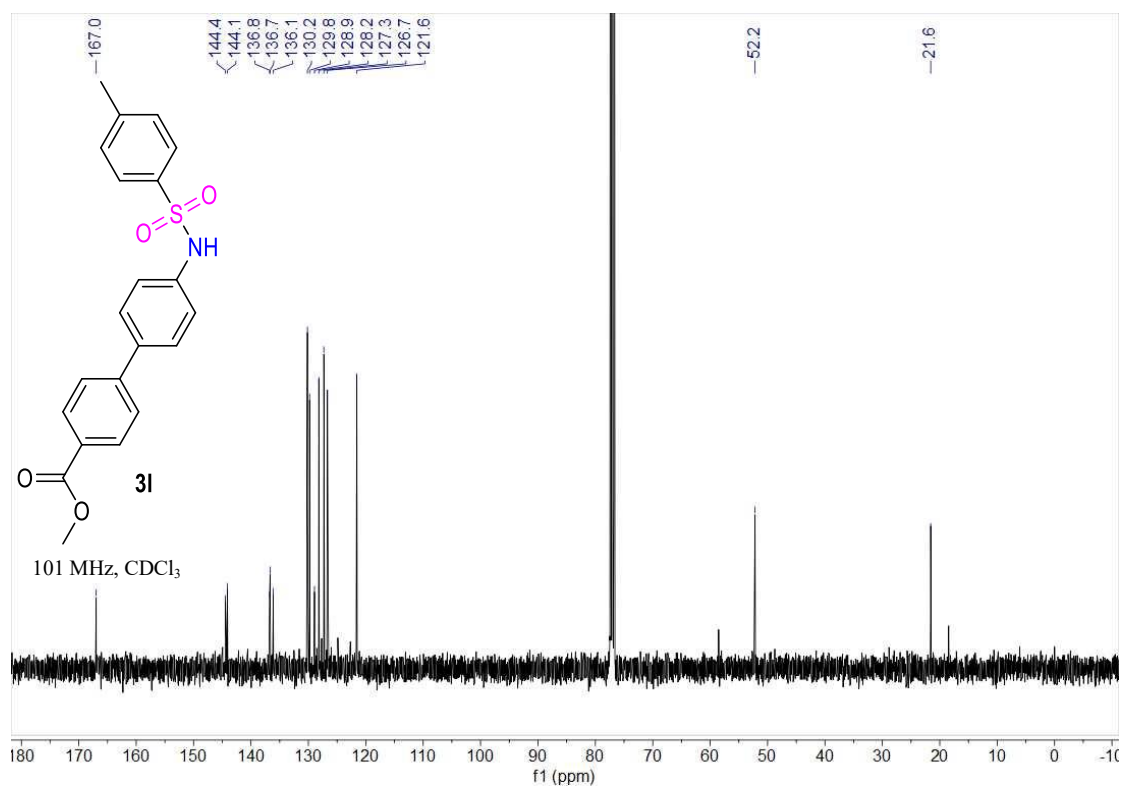

**4-methyl-*N*-(3'-(methylthio)-[1,1'-biphenyl]-4-yl)benzenesulfonamide (3m)**

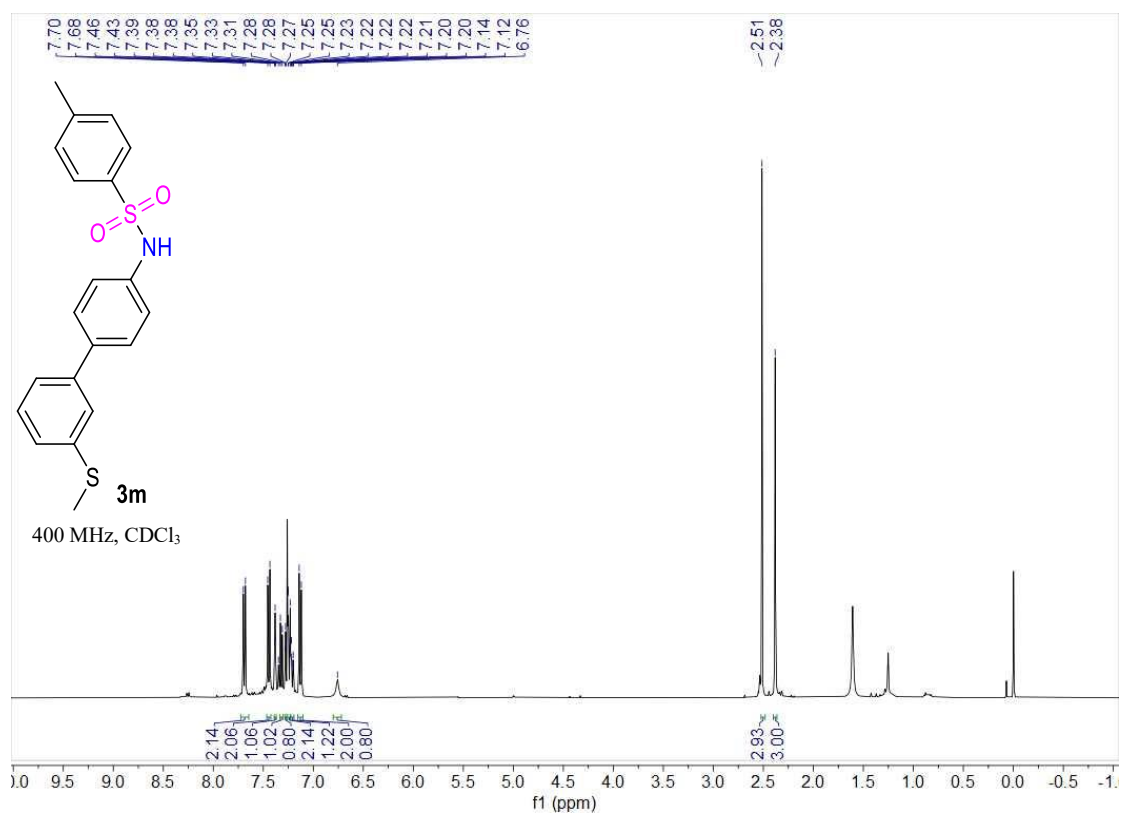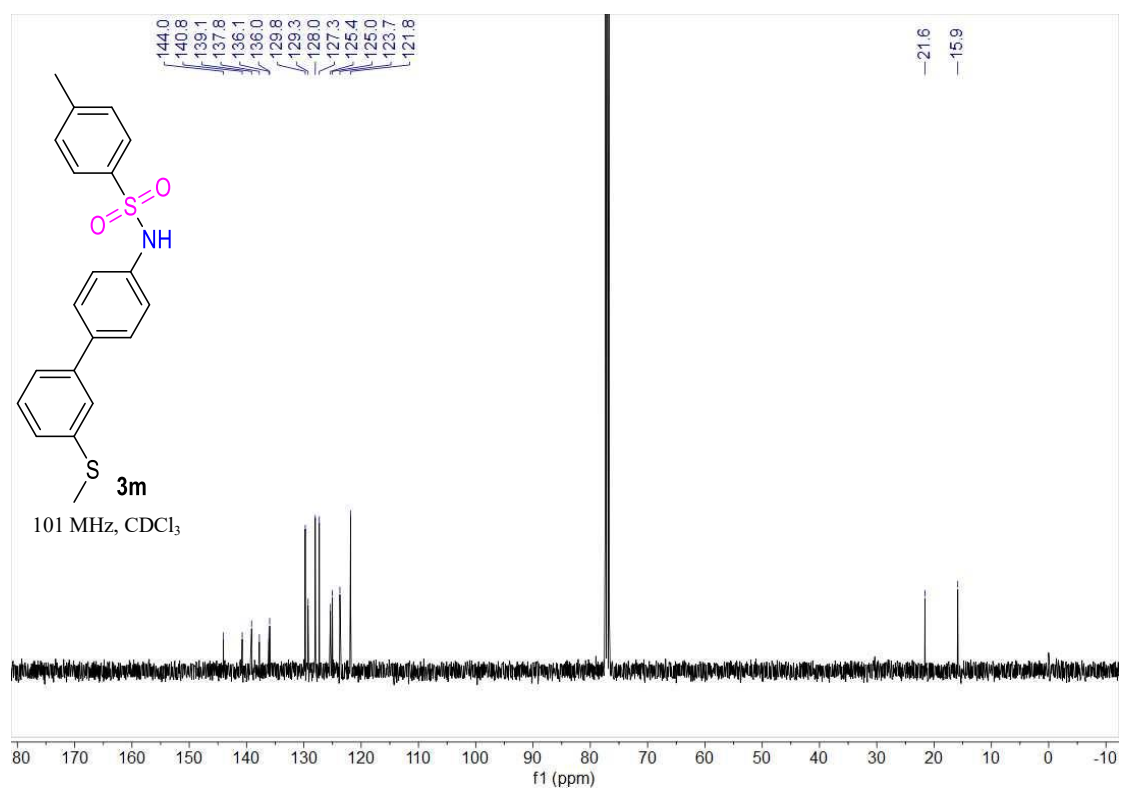

***N*-(4'-acetyl-[1,1'-biphenyl]-4-yl)-4-methylbenzenesulfonamide (3n)**

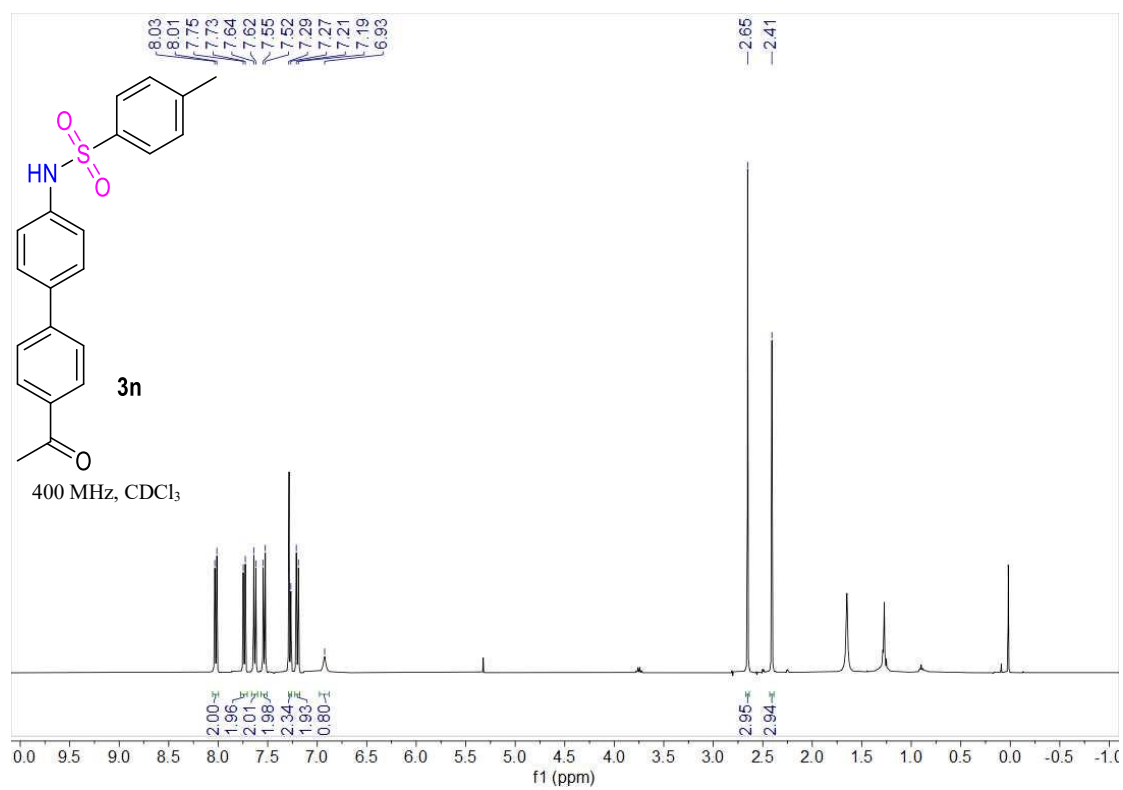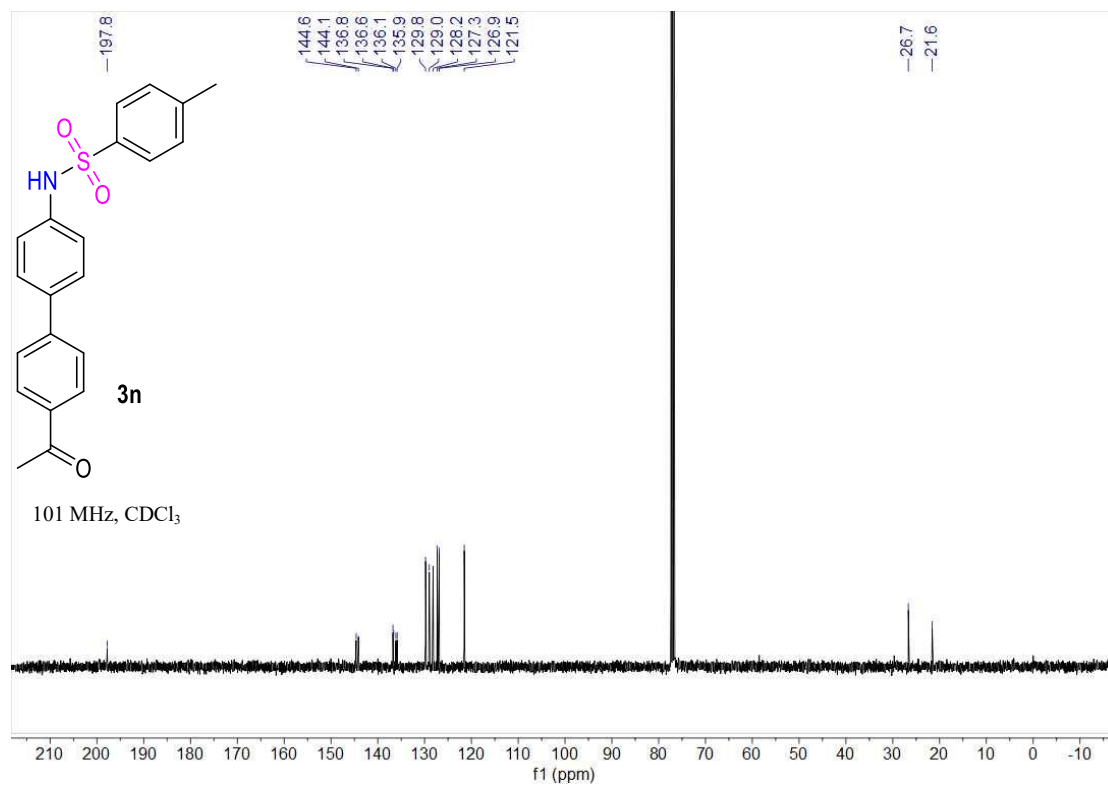

***N*-(4'-formyl-[1,1'-biphenyl]-4-yl)-4-methylbenzenesulfonamide (3o)**

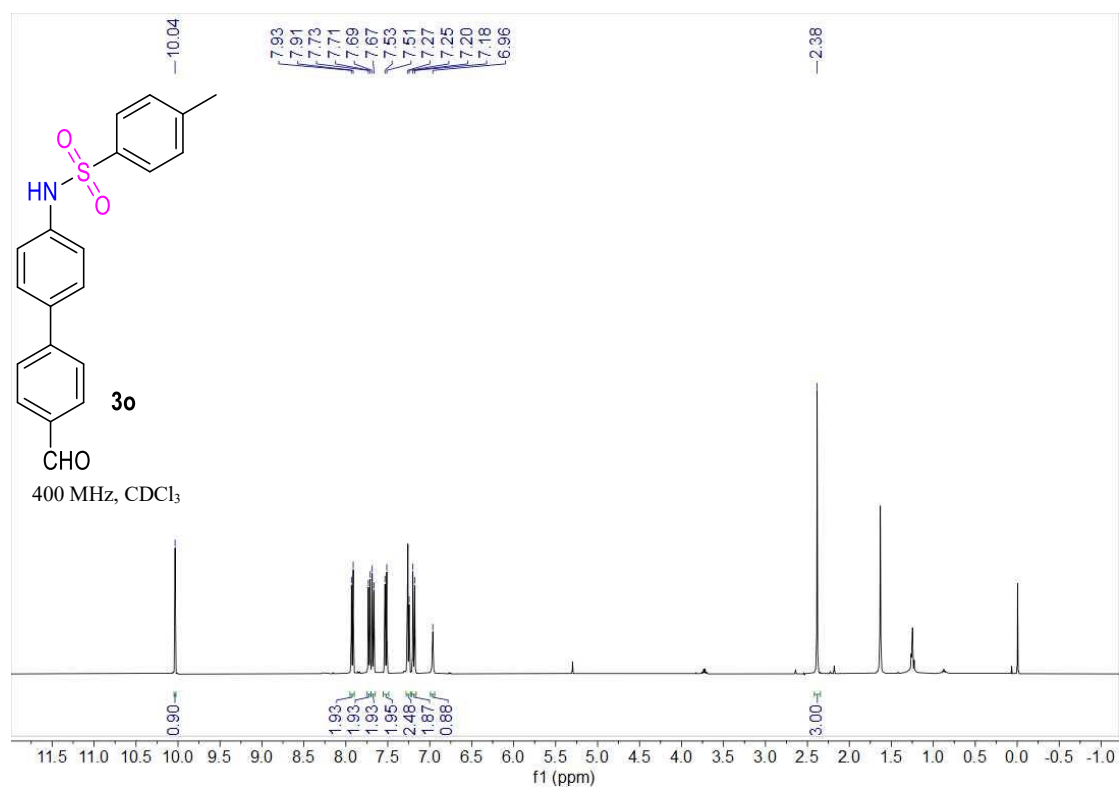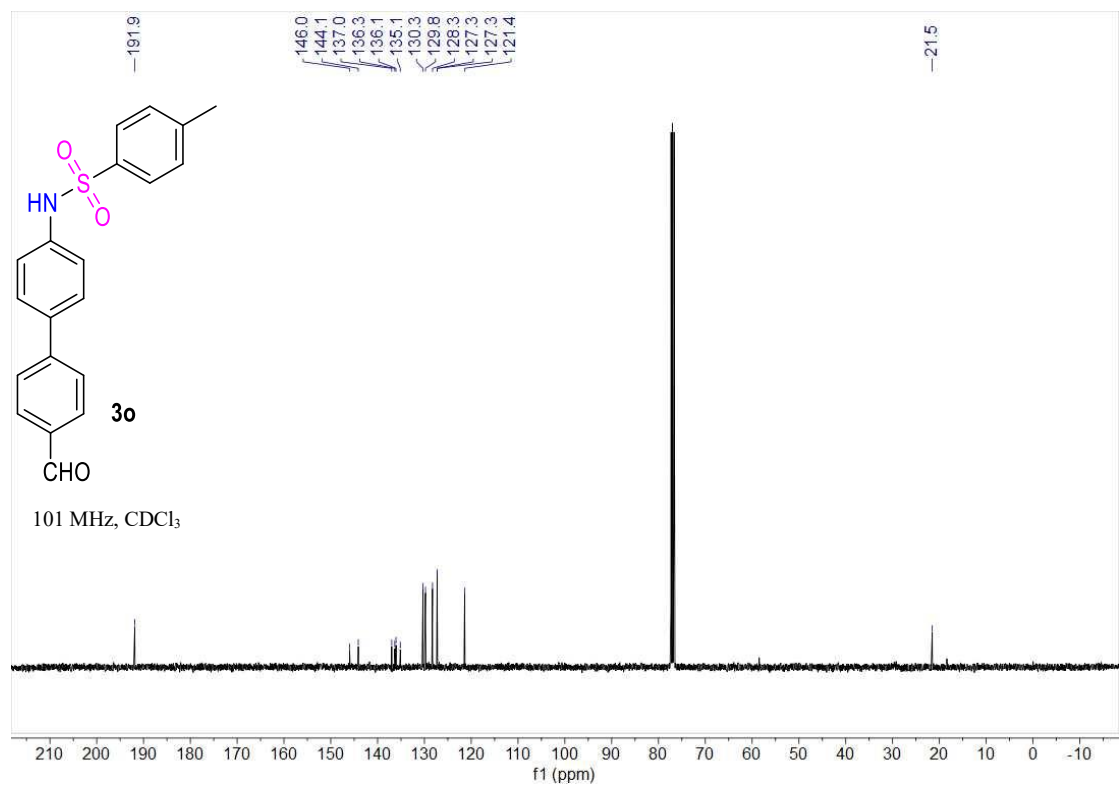

***N*-(4'-hydroxy-[1,1'-biphenyl]-4-yl)-4-methylbenzenesulfonamide (3p)**

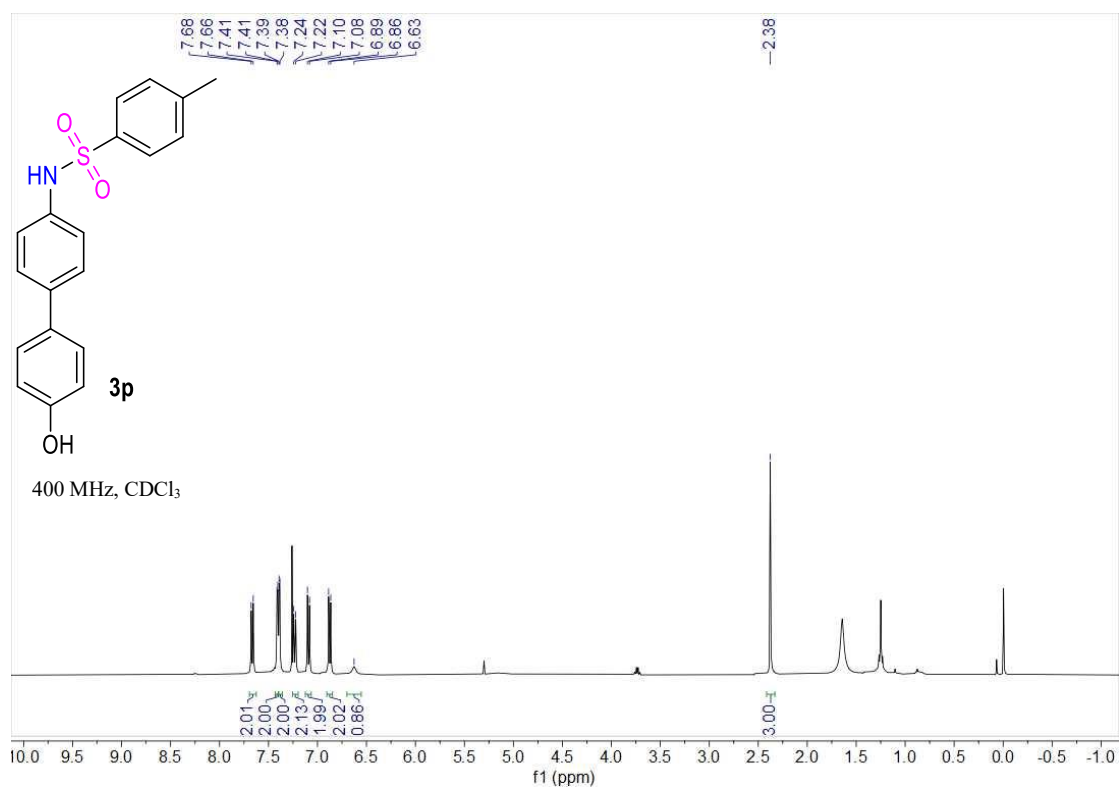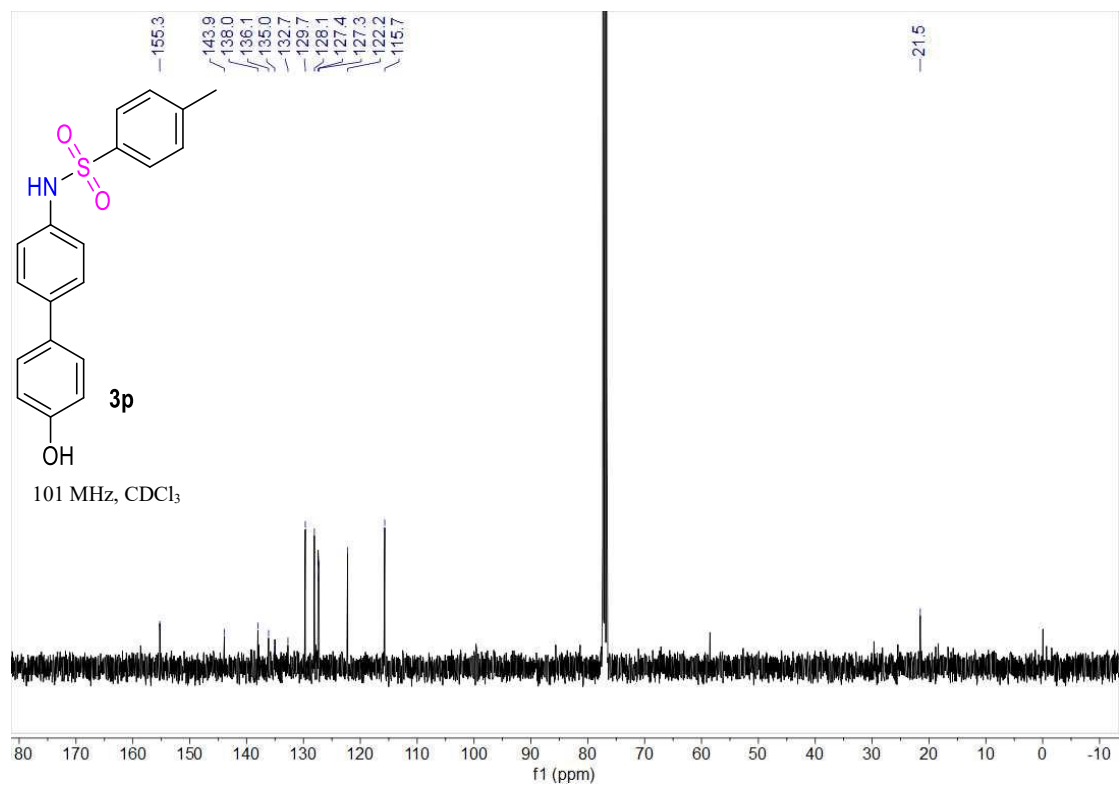

**4-methyl-*N*-(4-(thiophen-2-yl)phenyl)benzenesulfonamide (3q)**

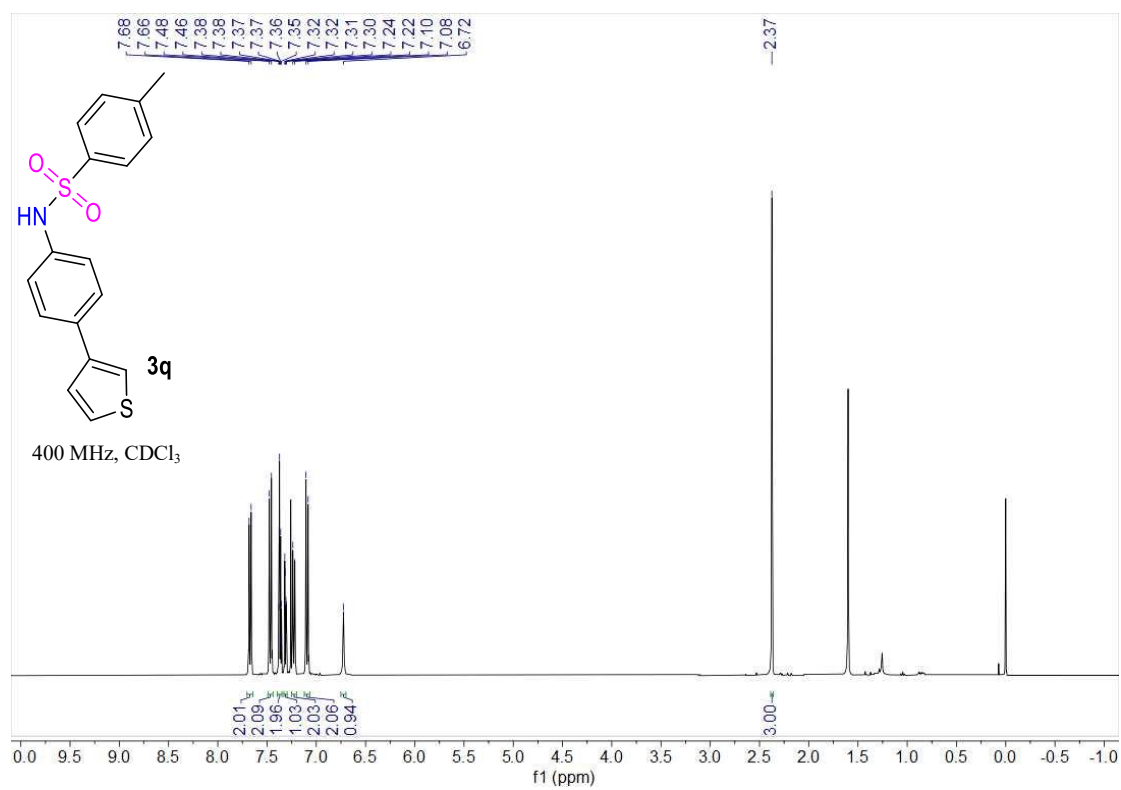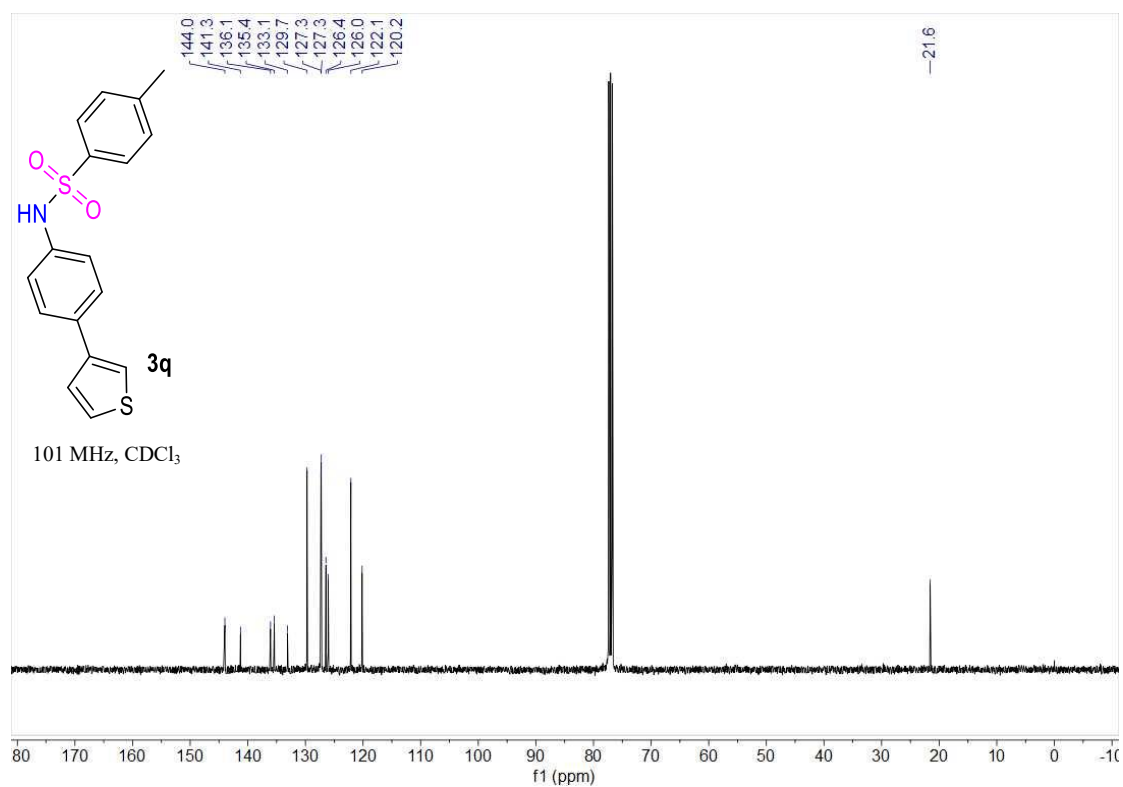



***N*-(4-(furan-2-yl)phenyl)-4-methylbenzenesulfonamide (3r)**

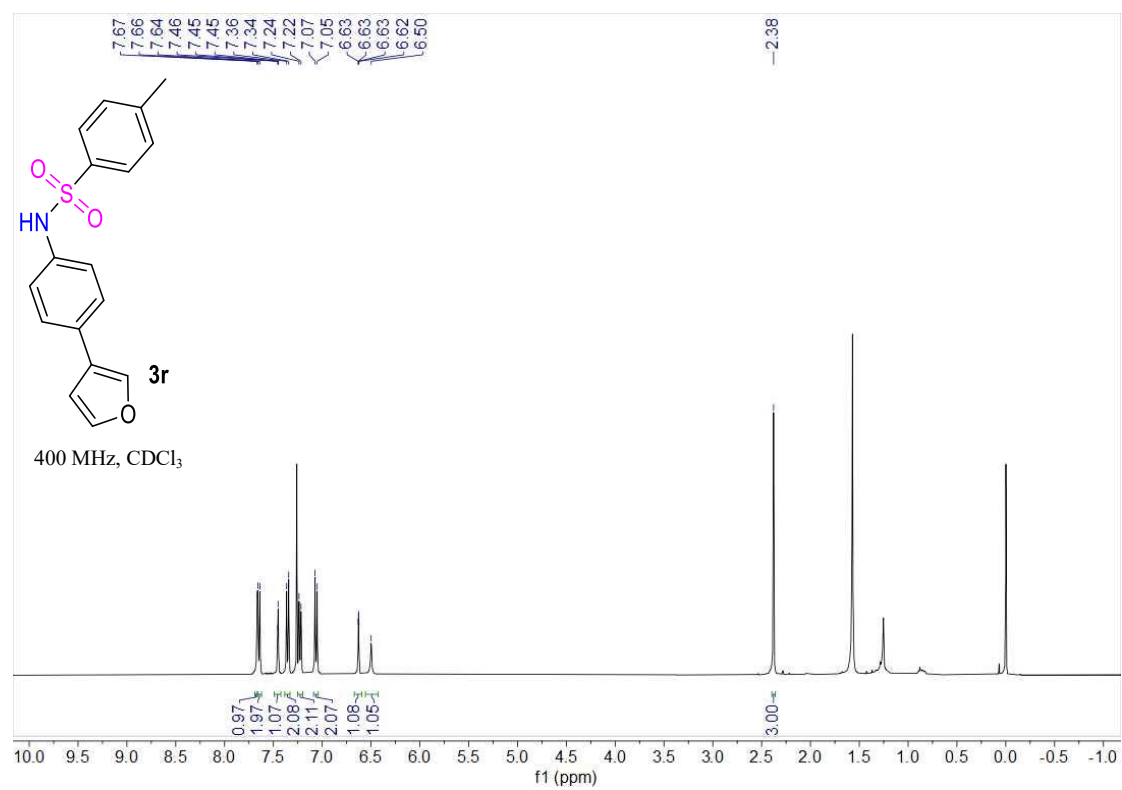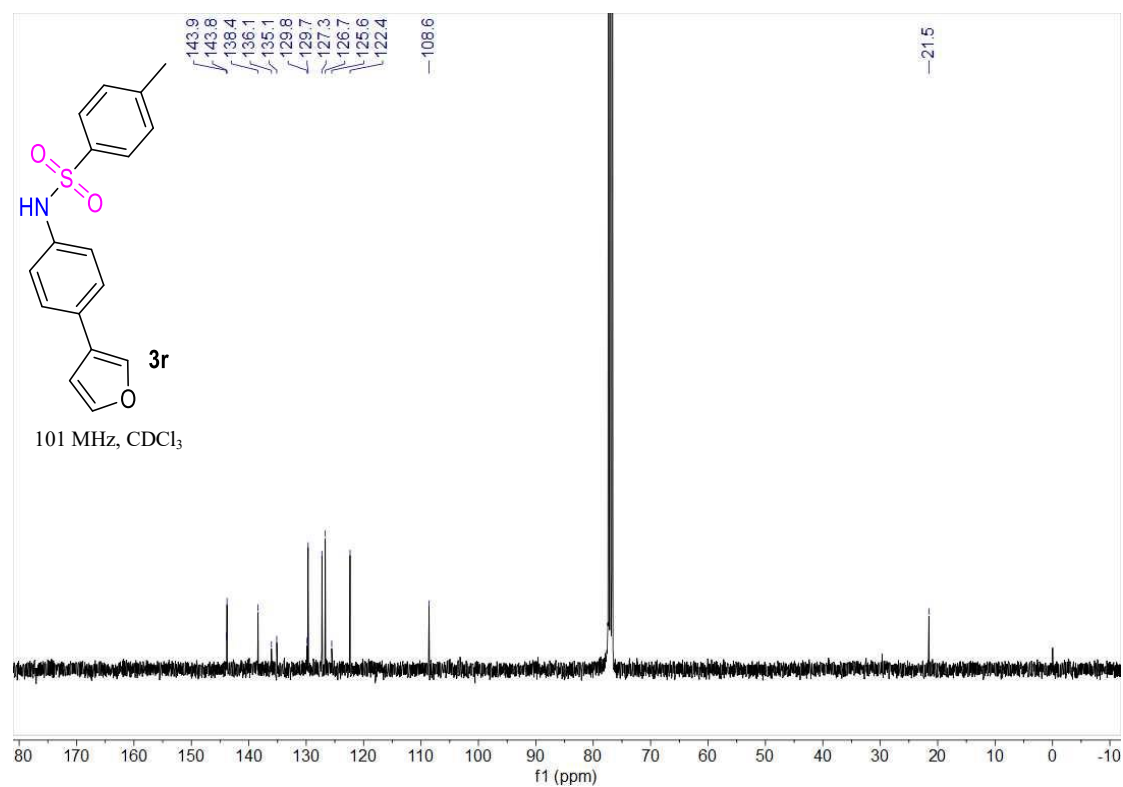

**4-methyl-*N*-(naphthalen-1-yl)benzenesulfonamide (3s)**

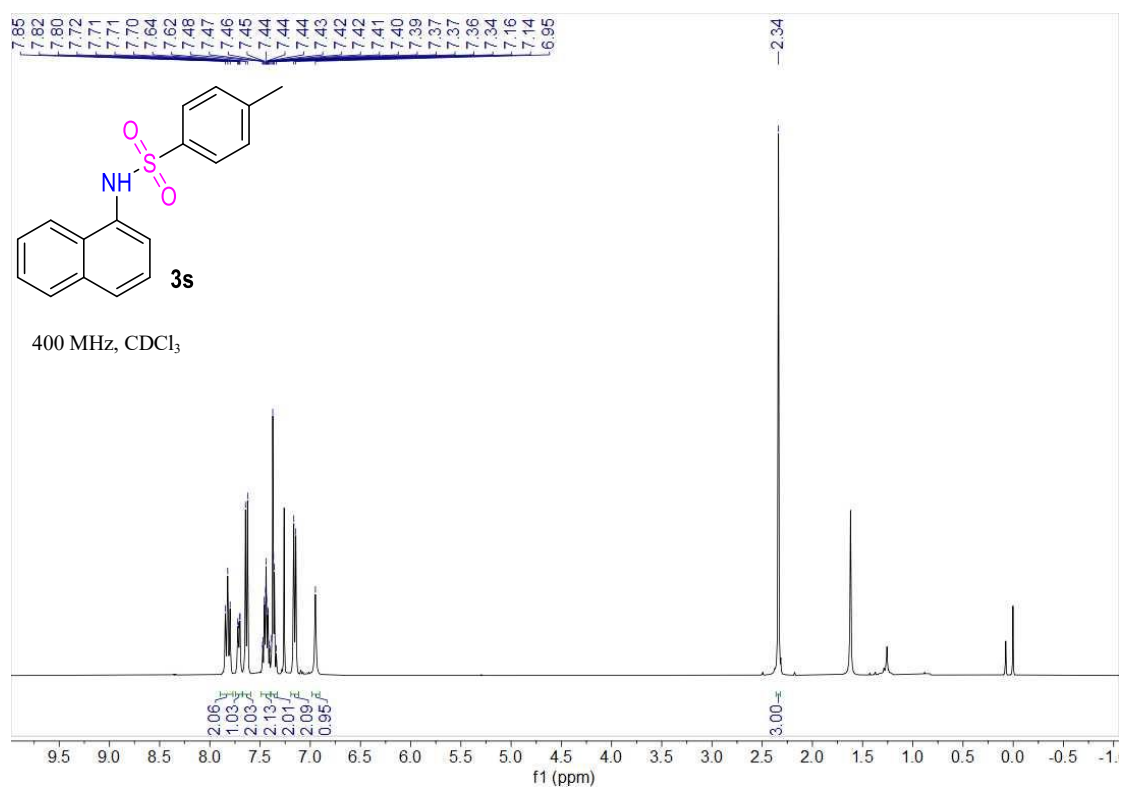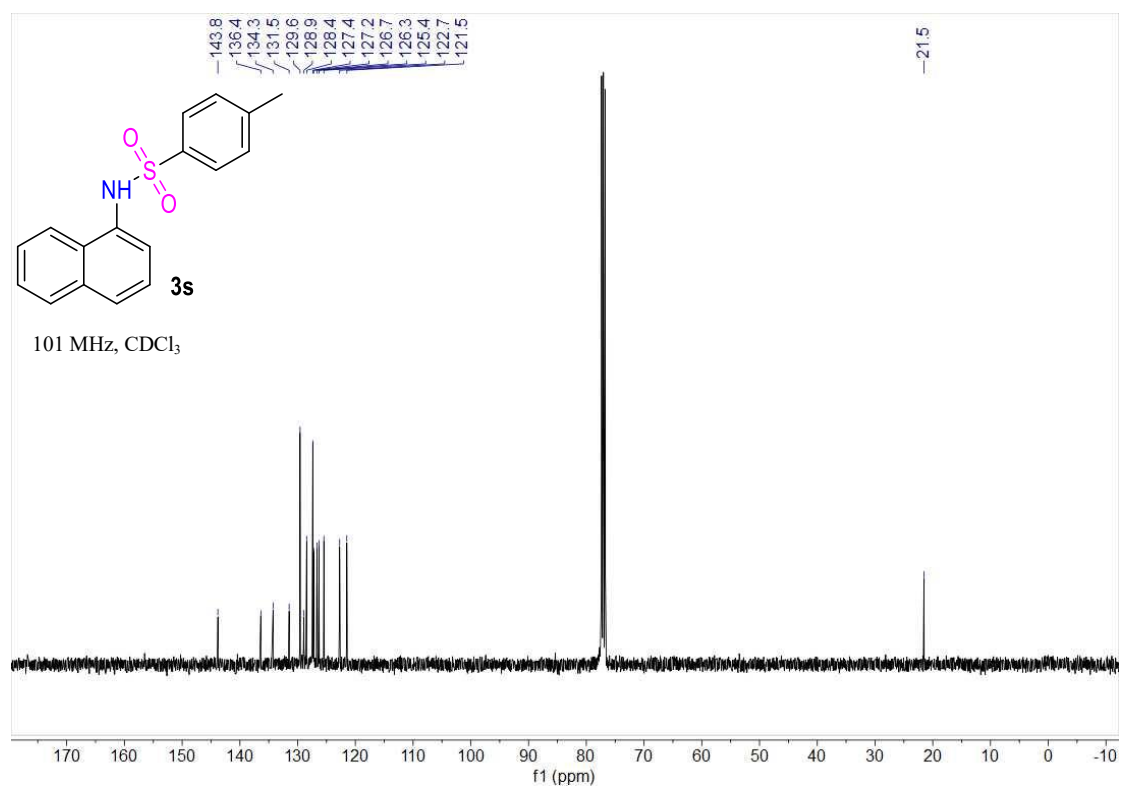

**4-methyl-*N*-(4-(naphthalen-1-yl)phenyl)benzenesulfonamide (3t)**

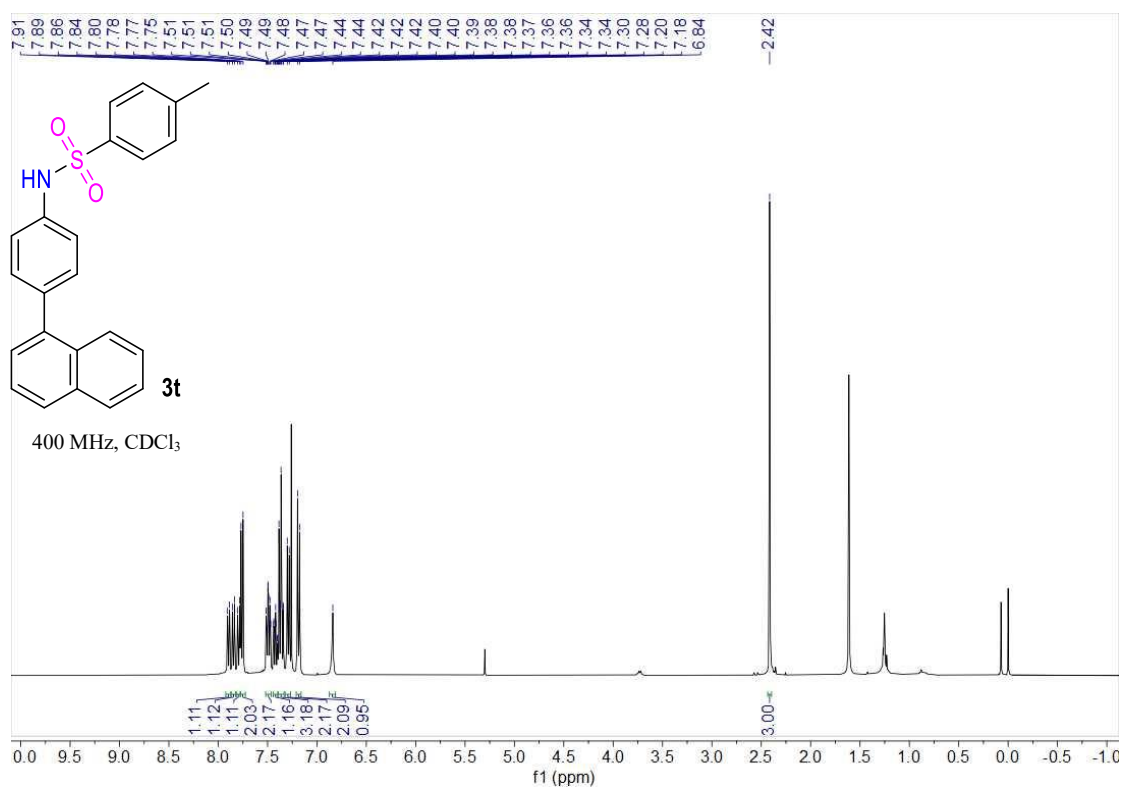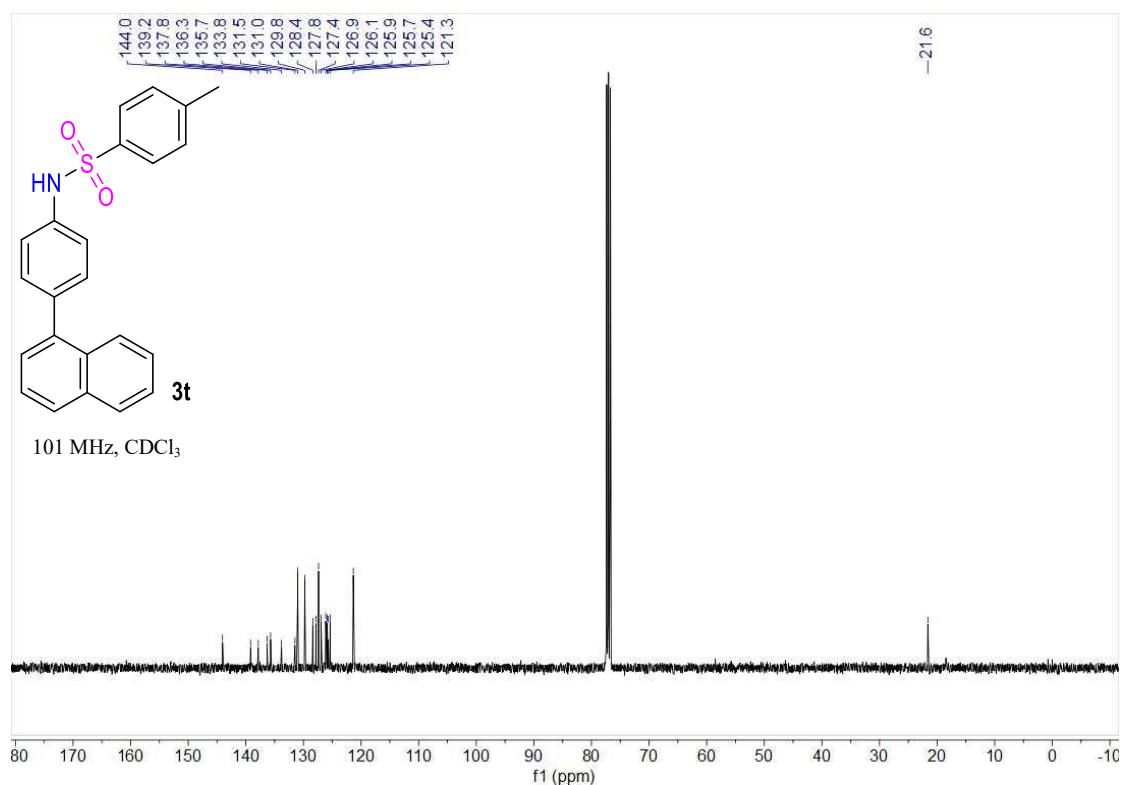

***N*-([1,1'-biphenyl-3-yl]-4-methylbenzenesulfonamide (3u)**

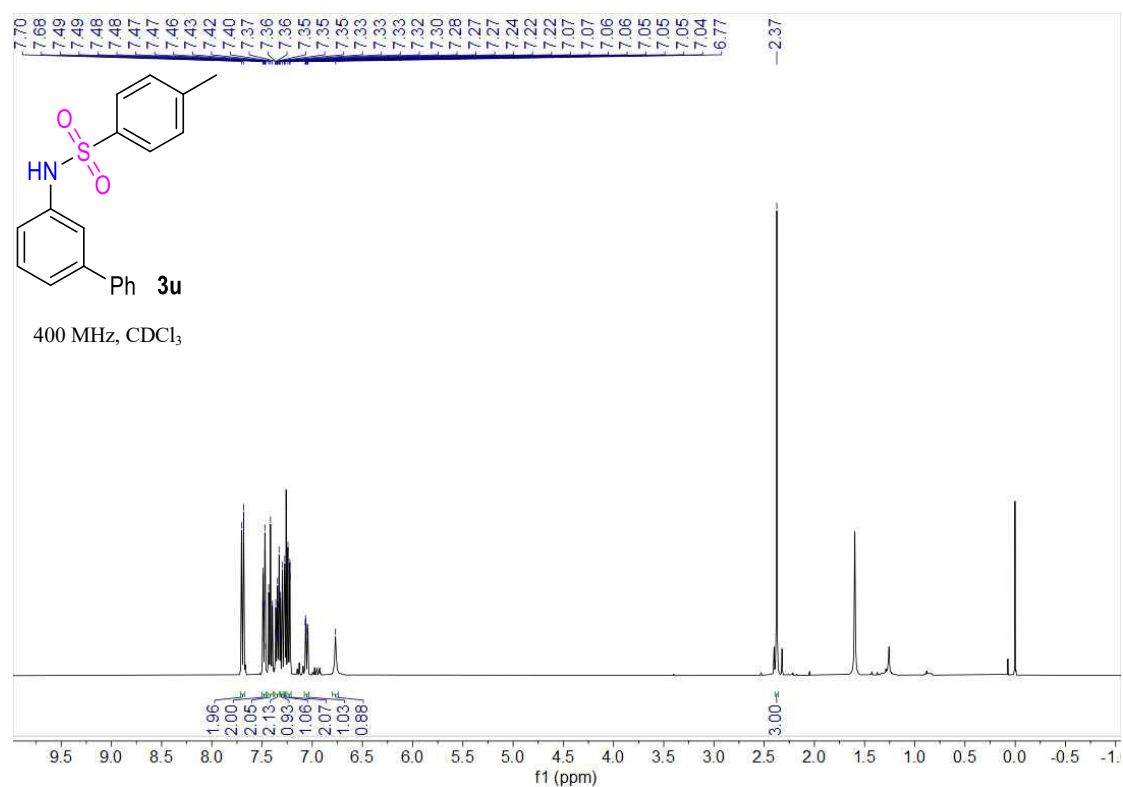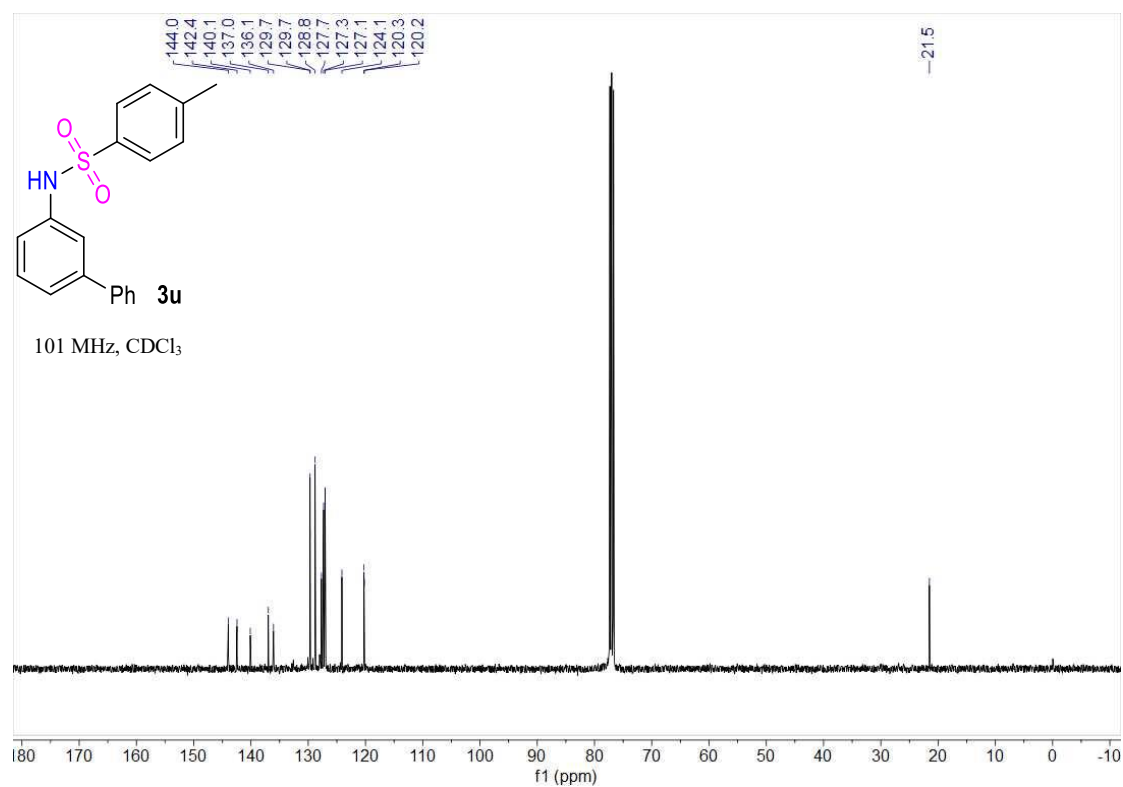

**4-methyl-*N*-phenylbenzenesulfonamide (3v)**

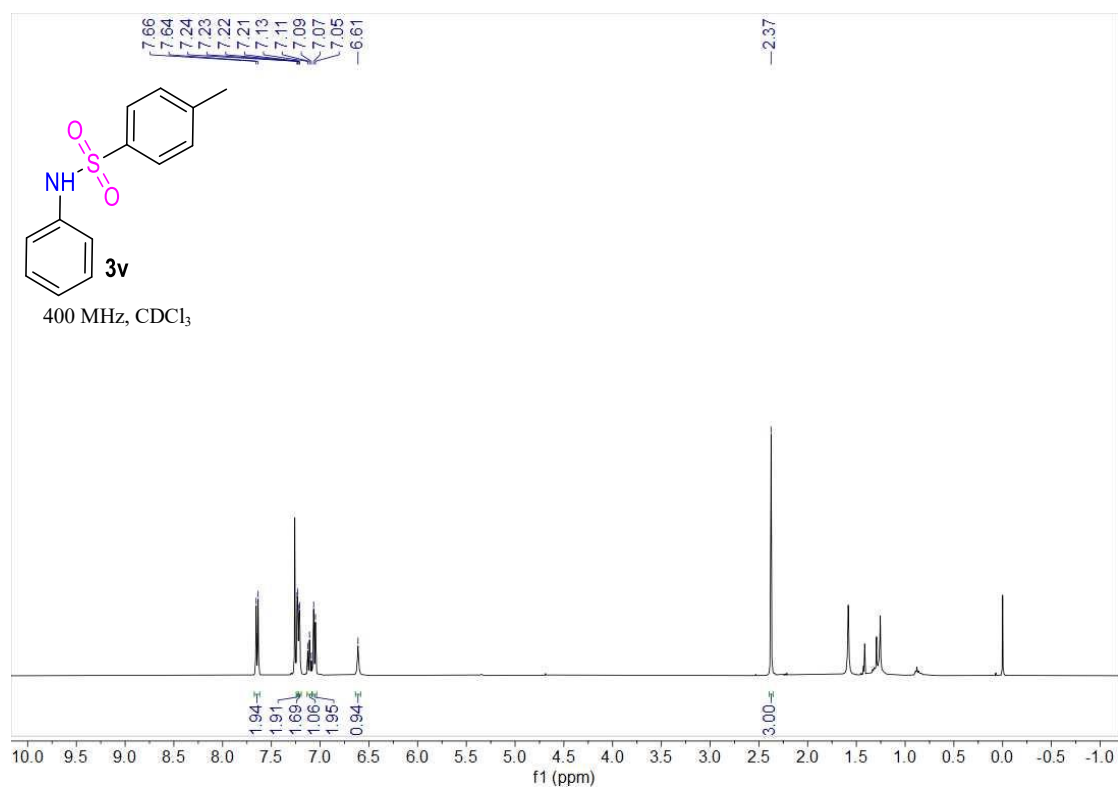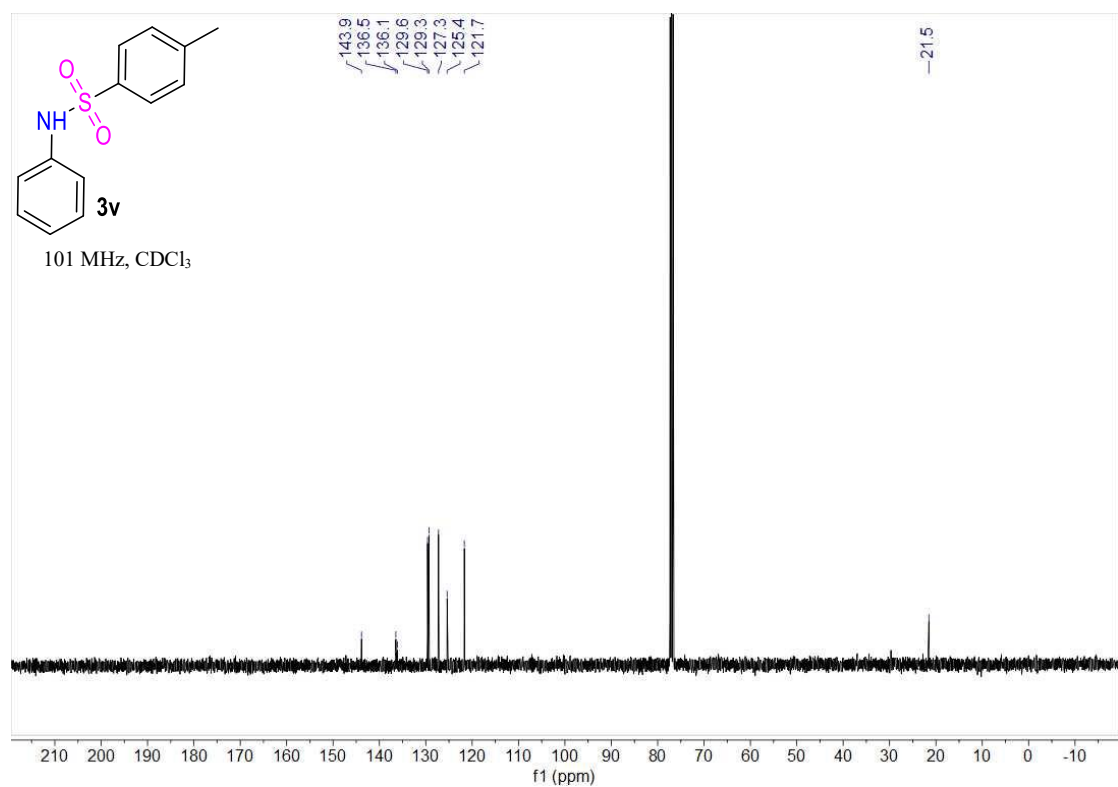

***N*-(4-cyclopropylphenyl)-4-methylbenzenesulfonamide (3w)**

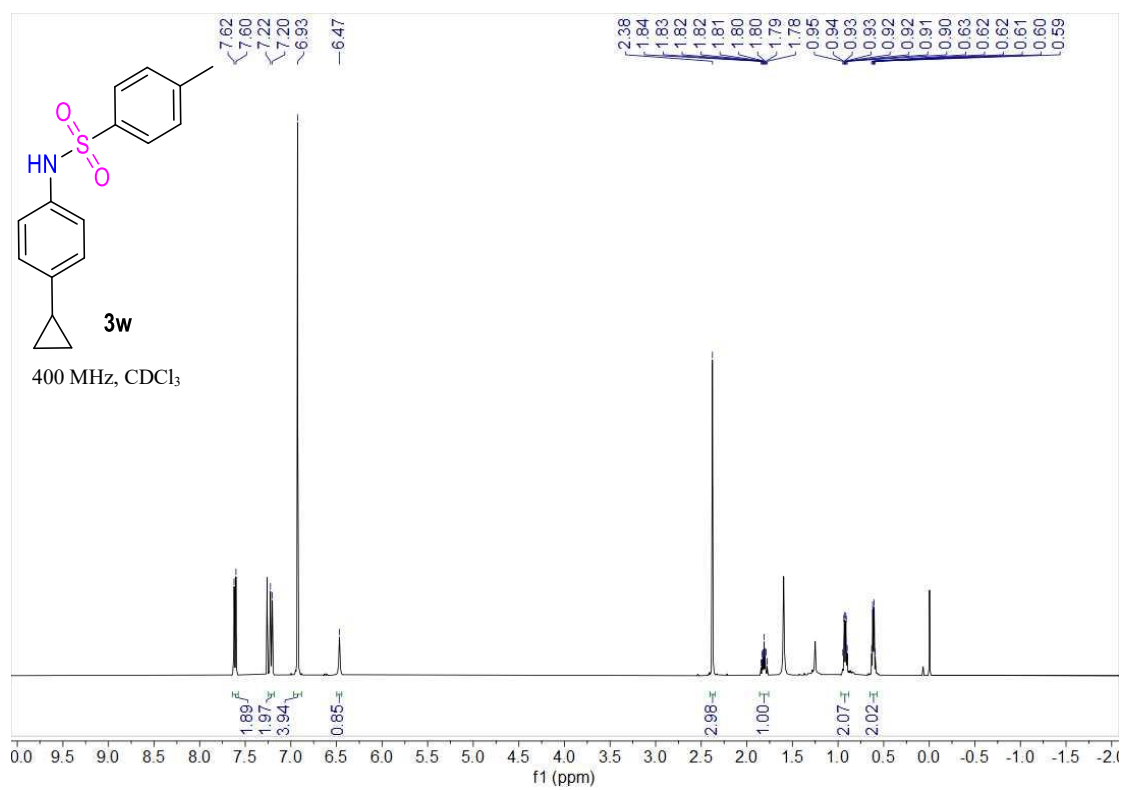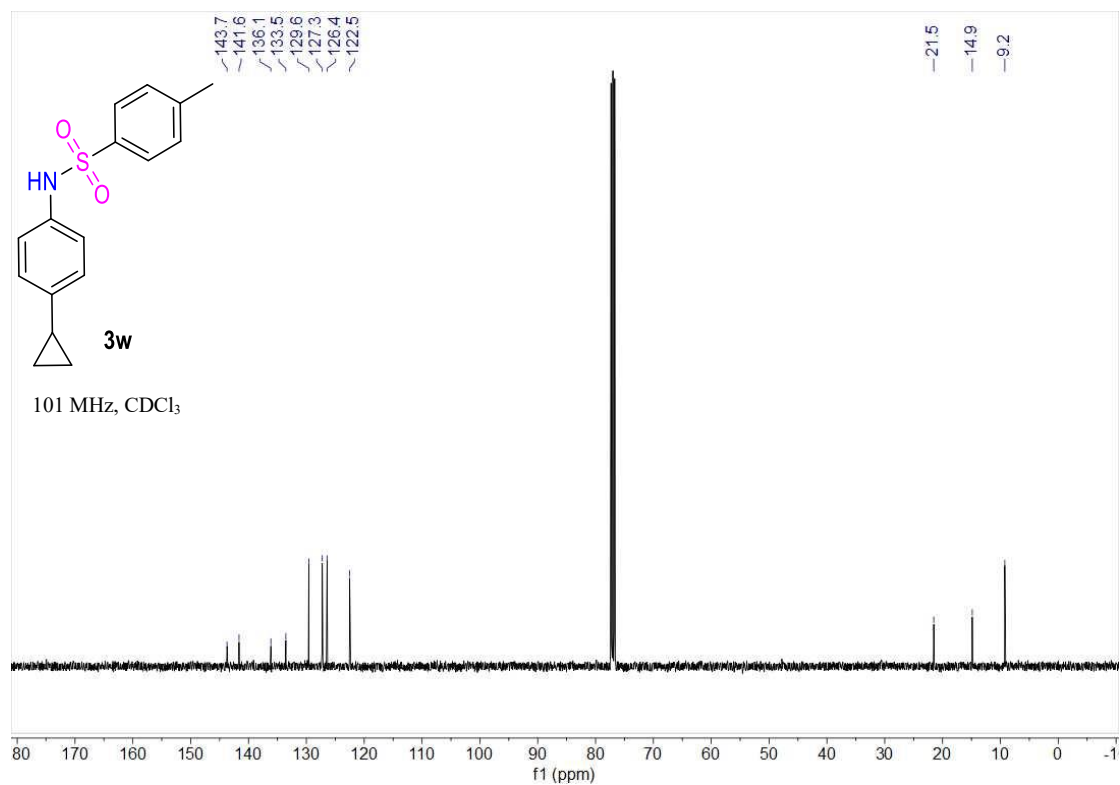

***N*-(4-bromophenyl)-4-methylbenzenesulfonamide (3x)**

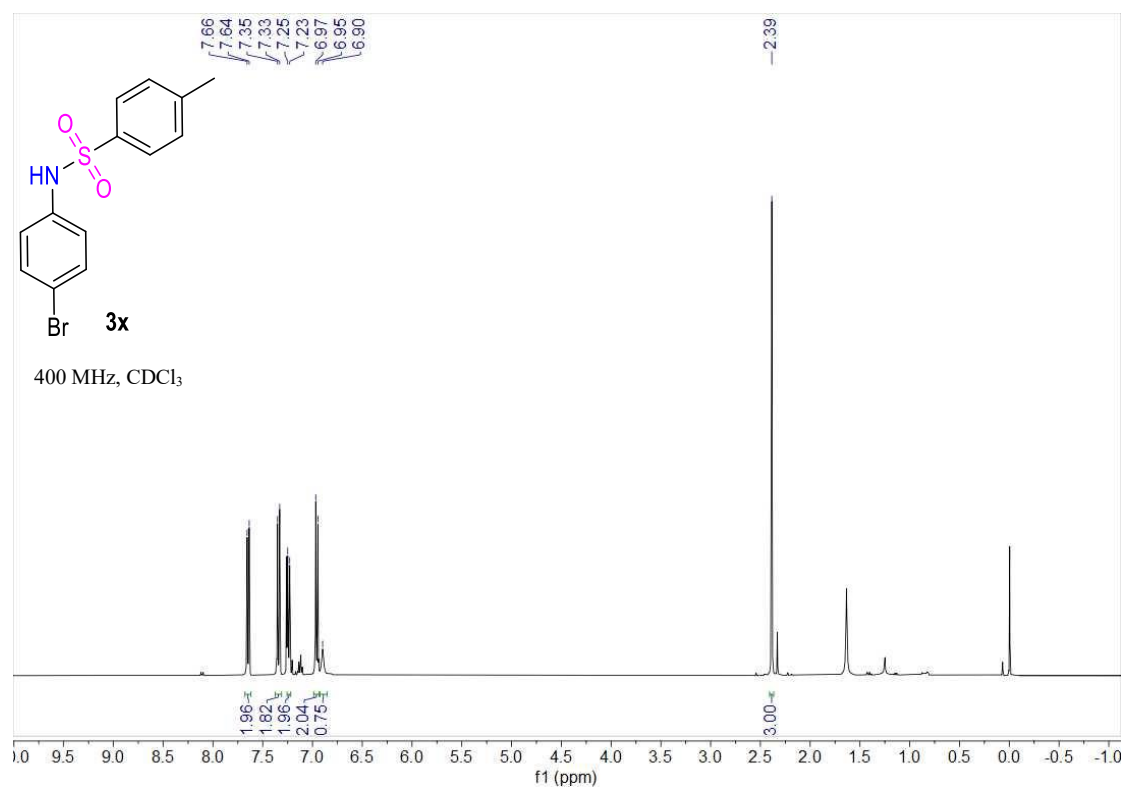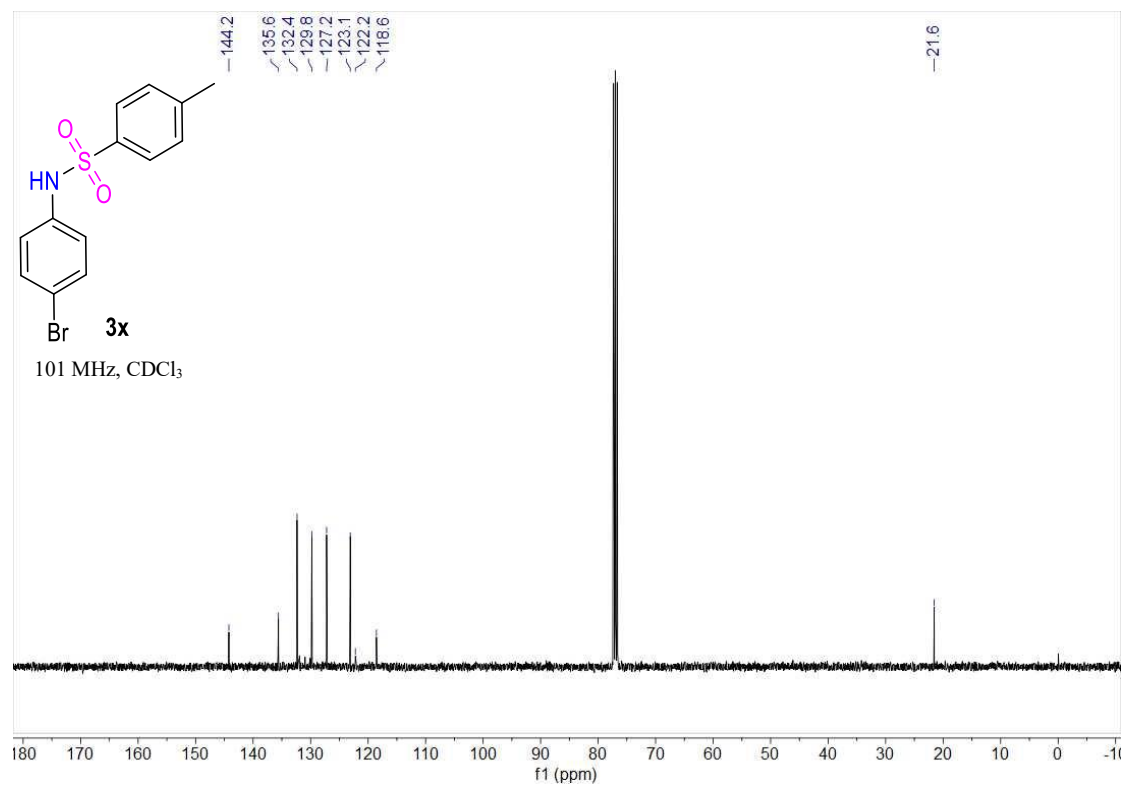

BrC1=CC=C(NC(=O)S(=O)(=O)C2=CC=C(C)C=C2)C=C1 **3y**  
 400 MHz, CDCl<sub>3</sub>

2.11, 0.96, 2.04, 0.76, 1.11, 1.02, 0.88, 3.00, -2.4

f1 (ppm)

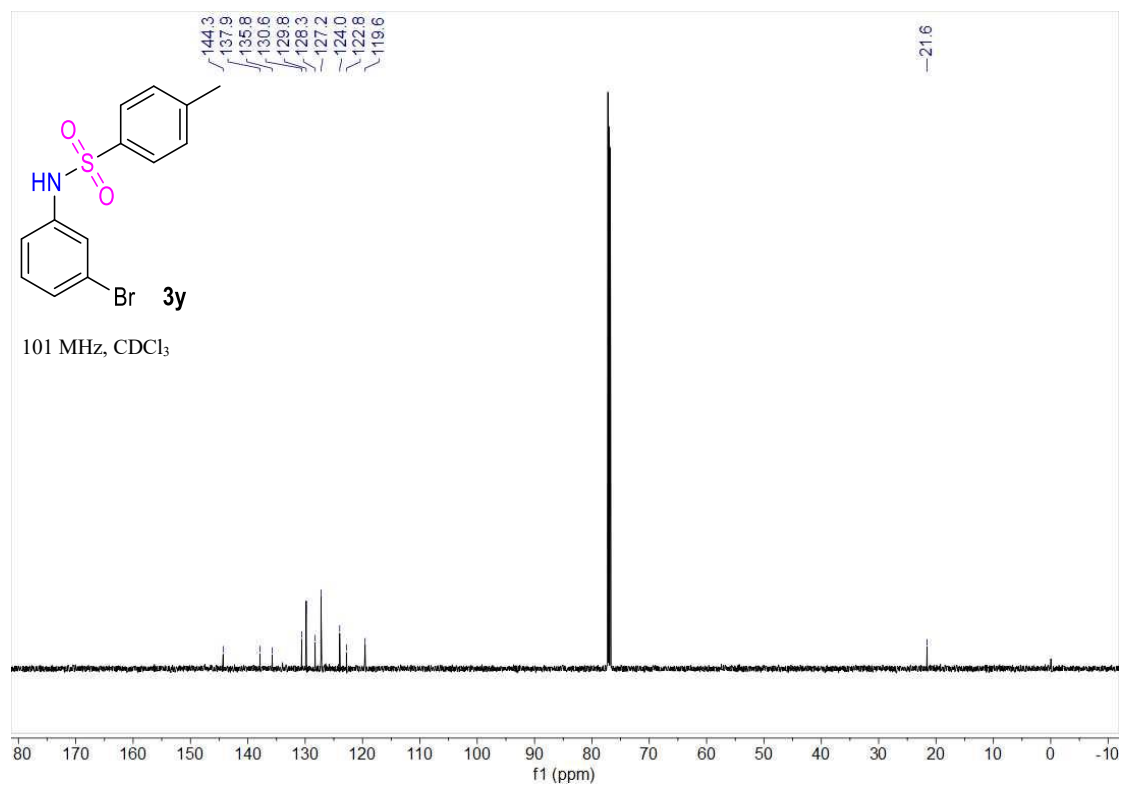



***N*-(3,5-dimethylphenyl)-4-methylbenzenesulfonamide (3z)**

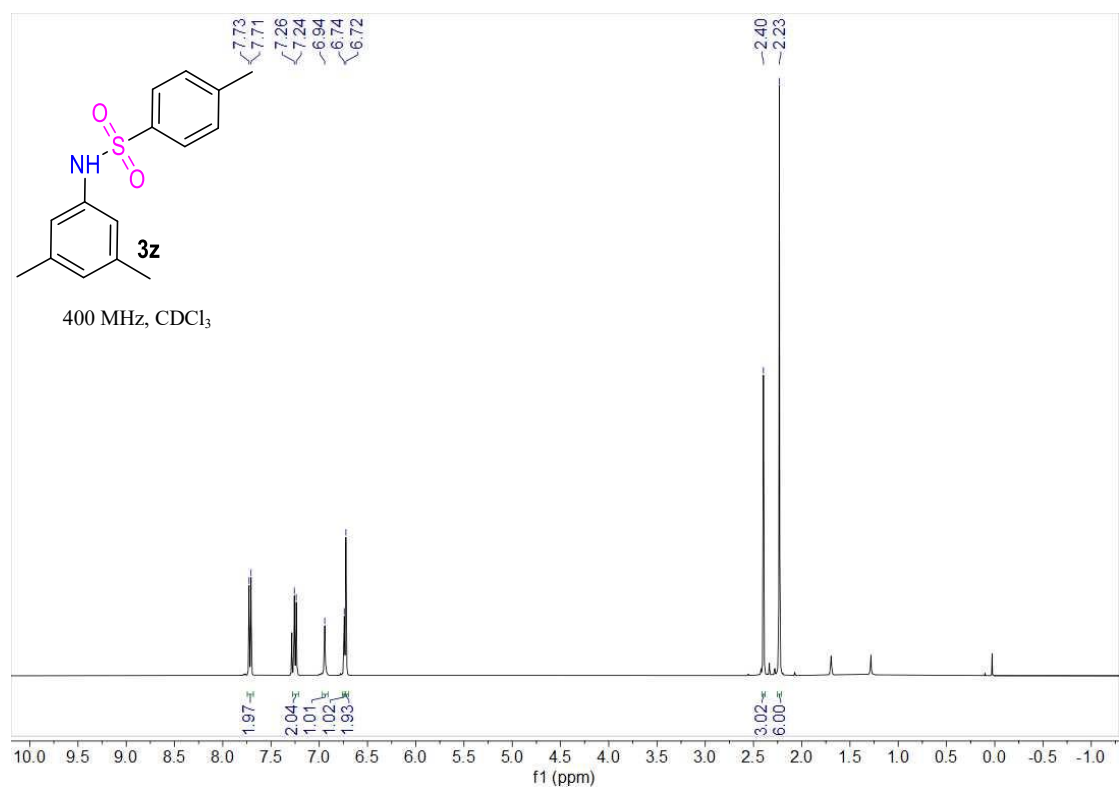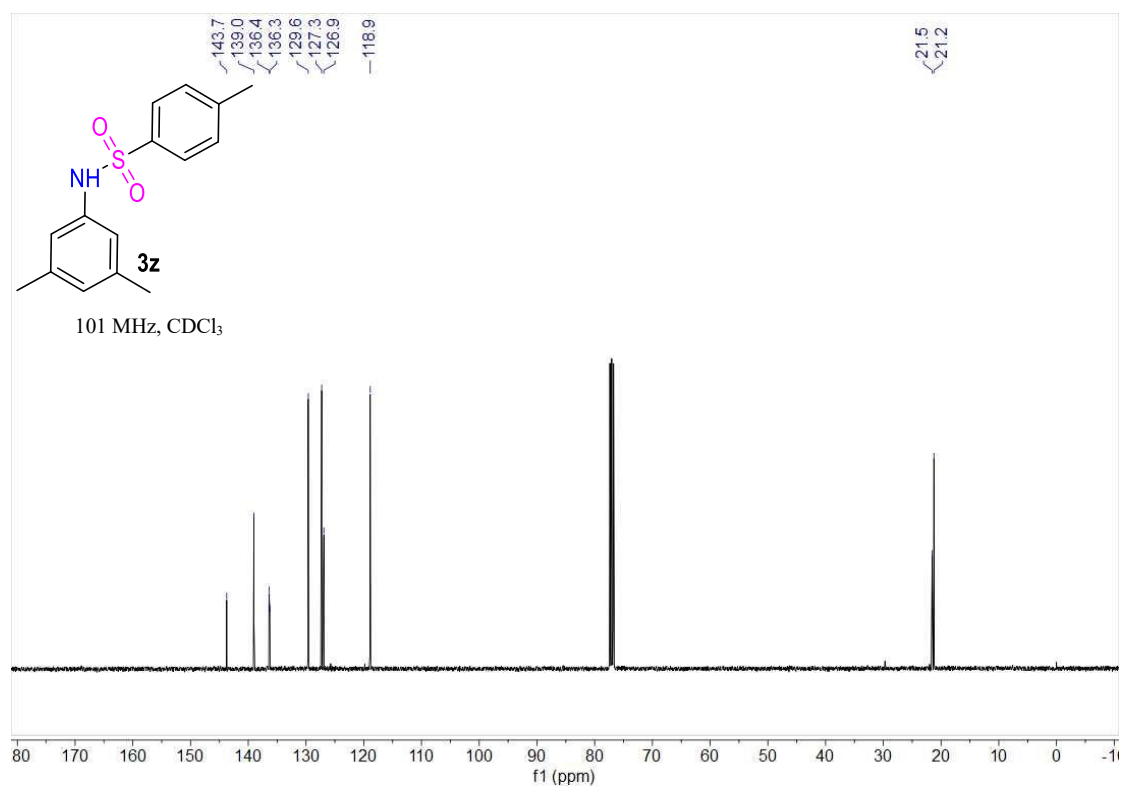

***N*-(4-acetylphenyl)-4-methylbenzenesulfonamide (3aa)**

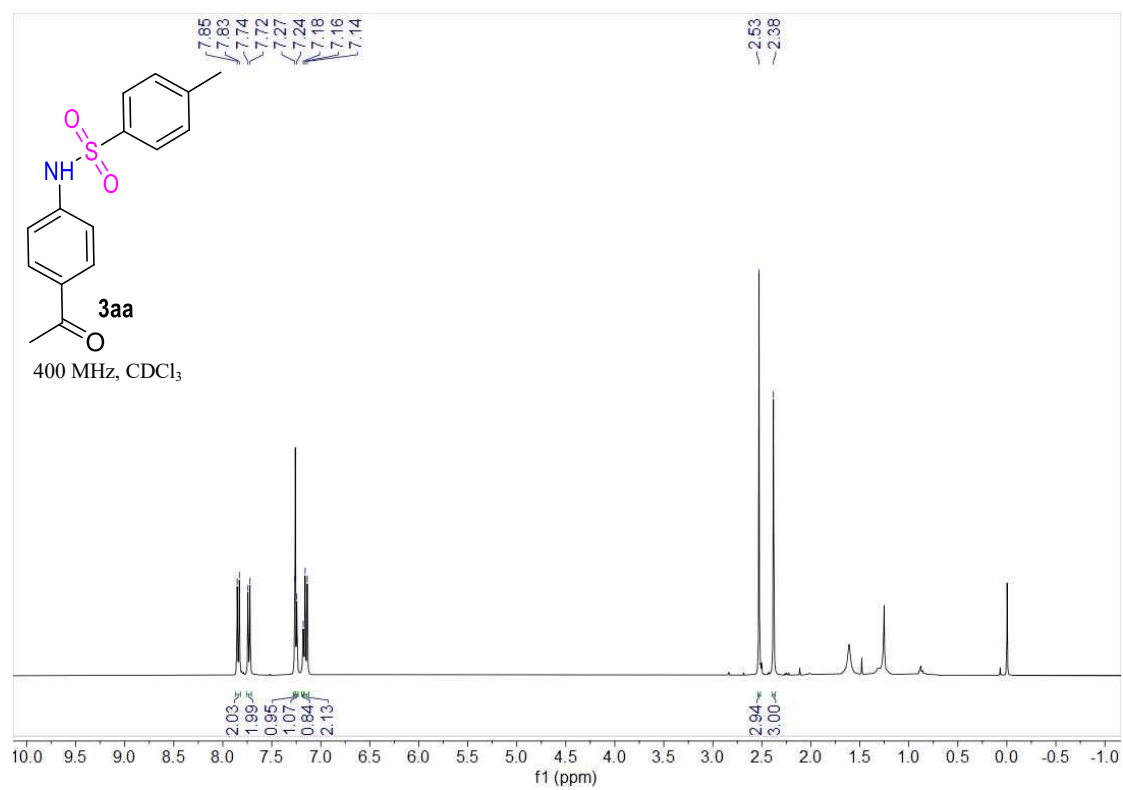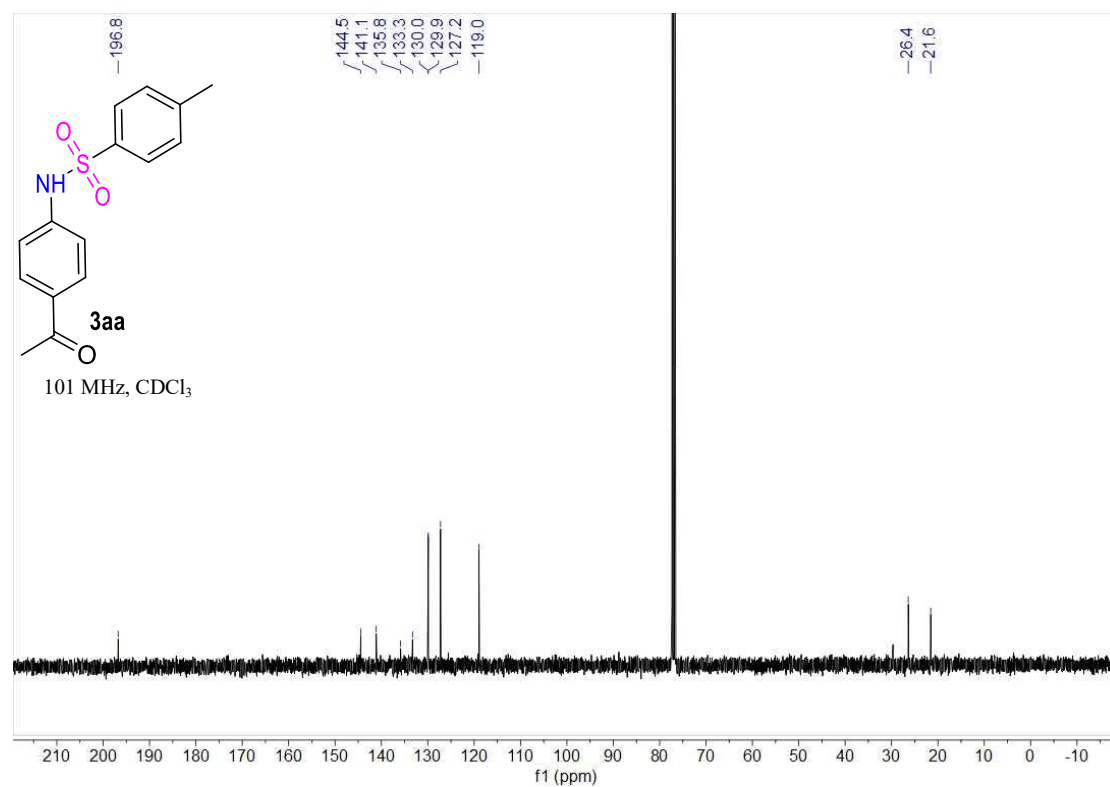

**Methyl-4-((4-methylphenyl)sulfonamido)benzoate (3ab)**

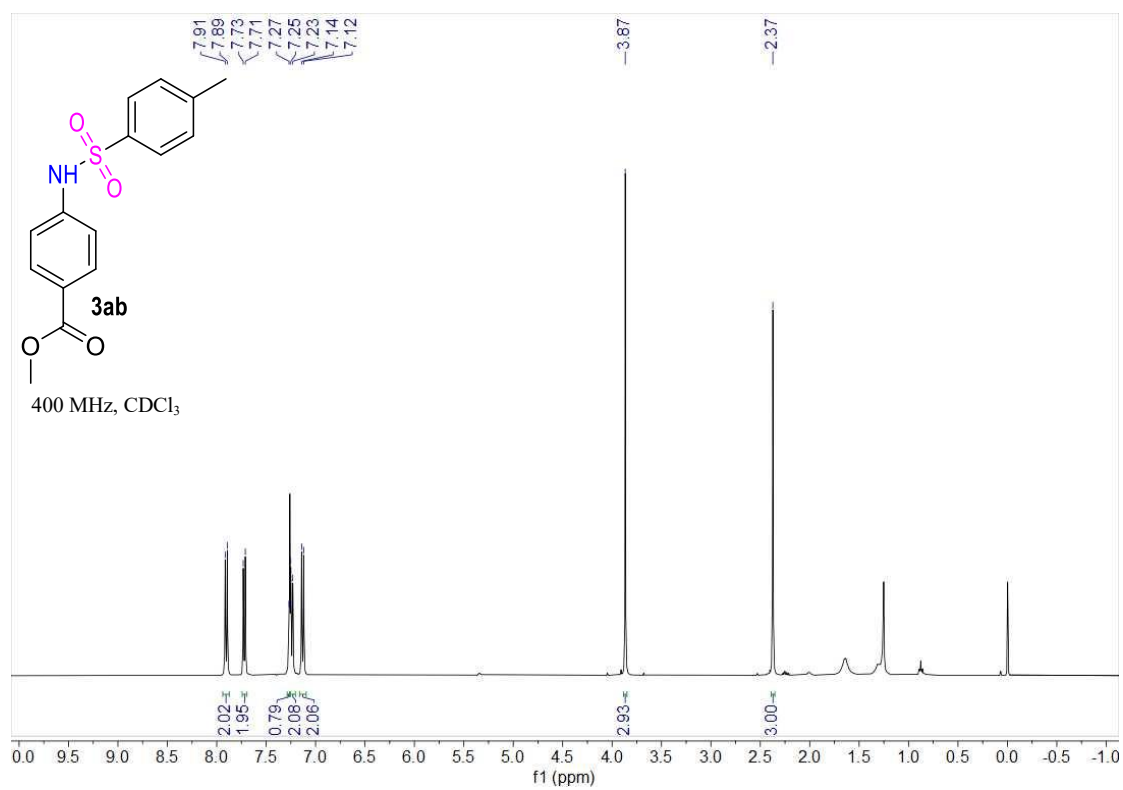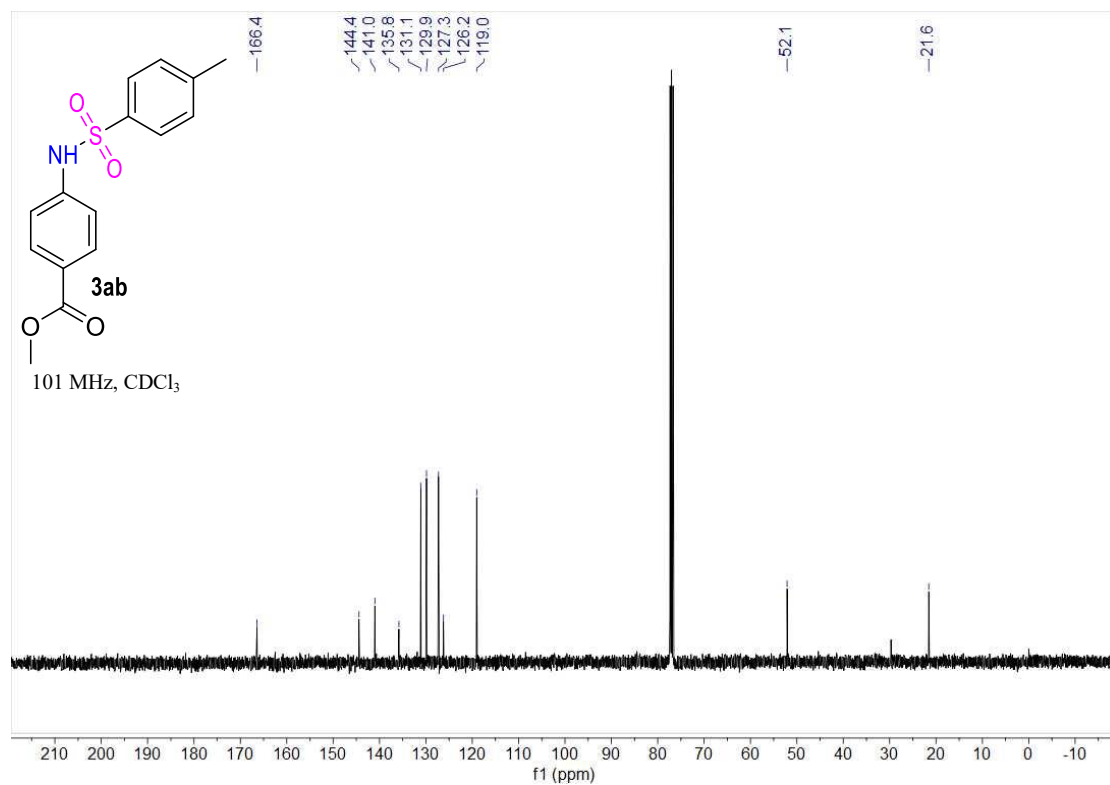

***N*-(4-(cyanomethyl)phenyl)-4-methylbenzenesulfonamide (3ac)**

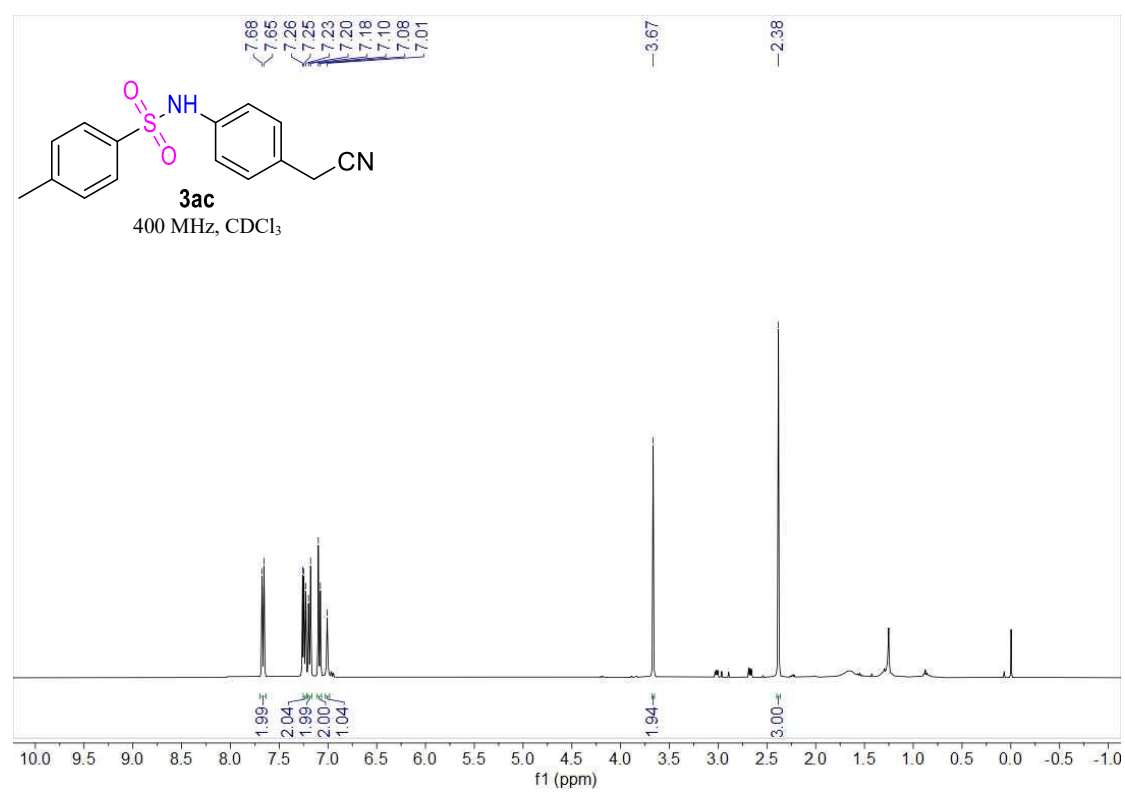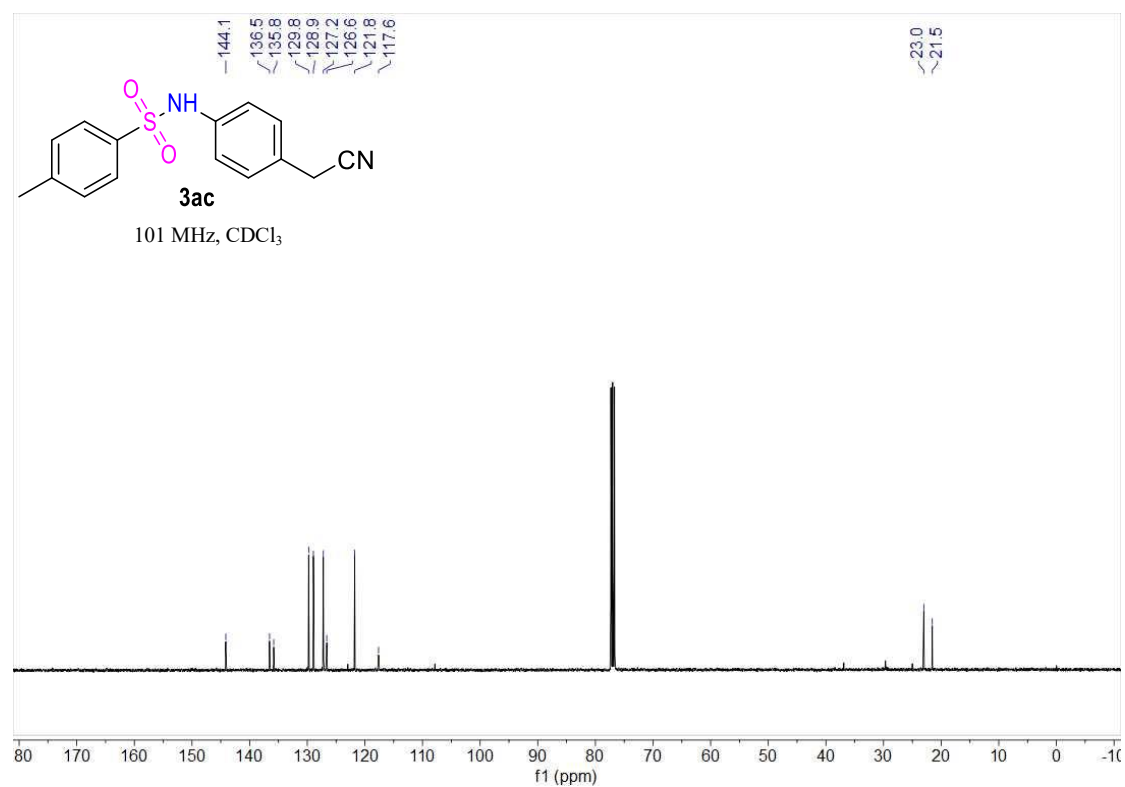

**4-methyl-*N*-(1-oxo-2,3-dihydro-1H-inden-5-yl)benzenesulfonamide (3ad)**

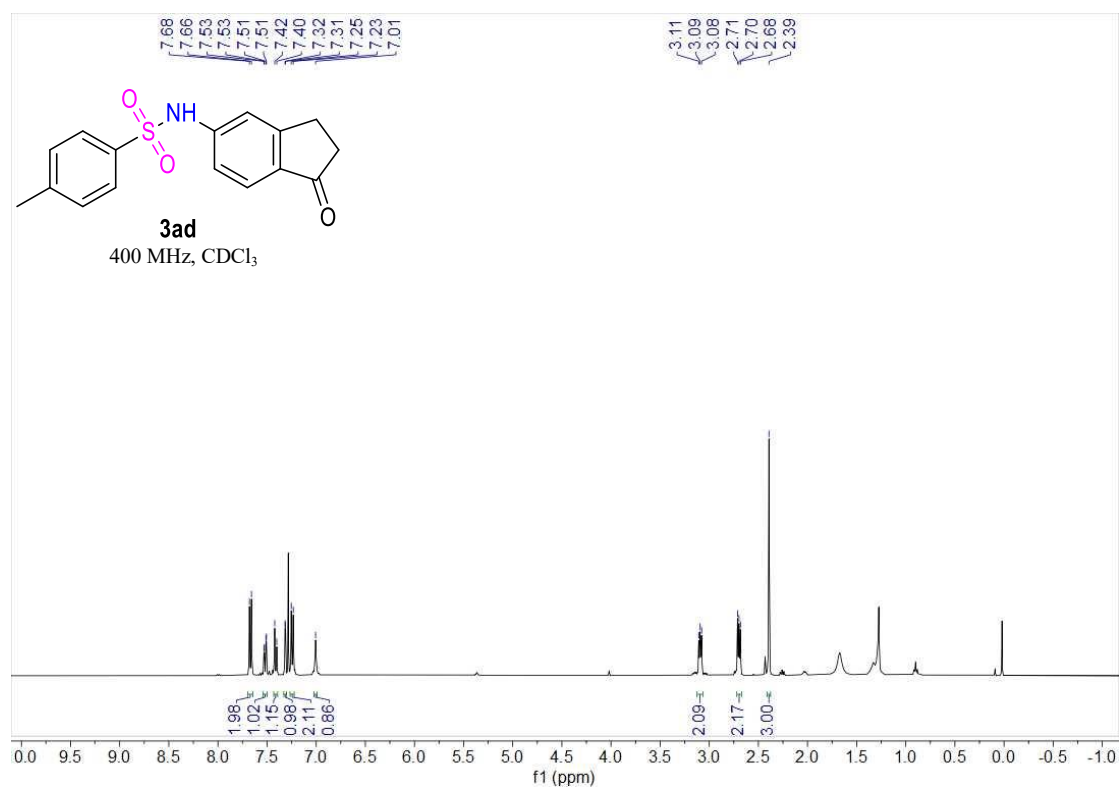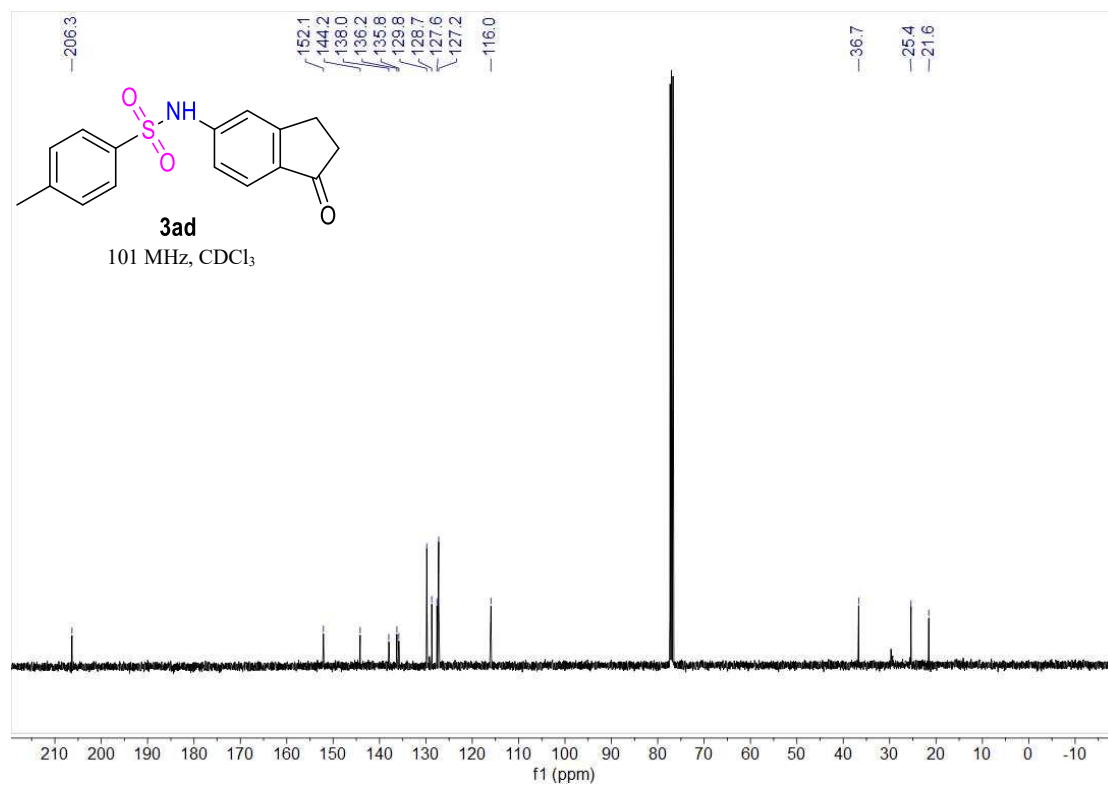

***N*-([1,1'-biphenyl]-4-yl)-4-methoxybenzenesulfonamide (3ae)**

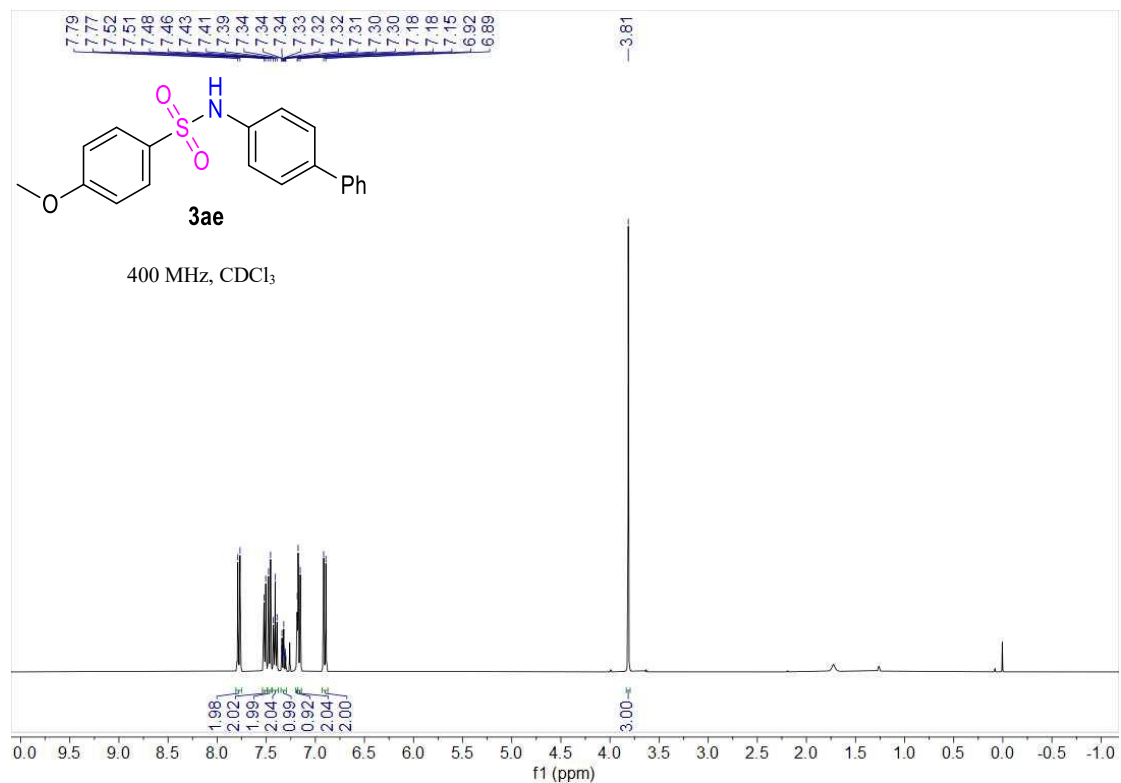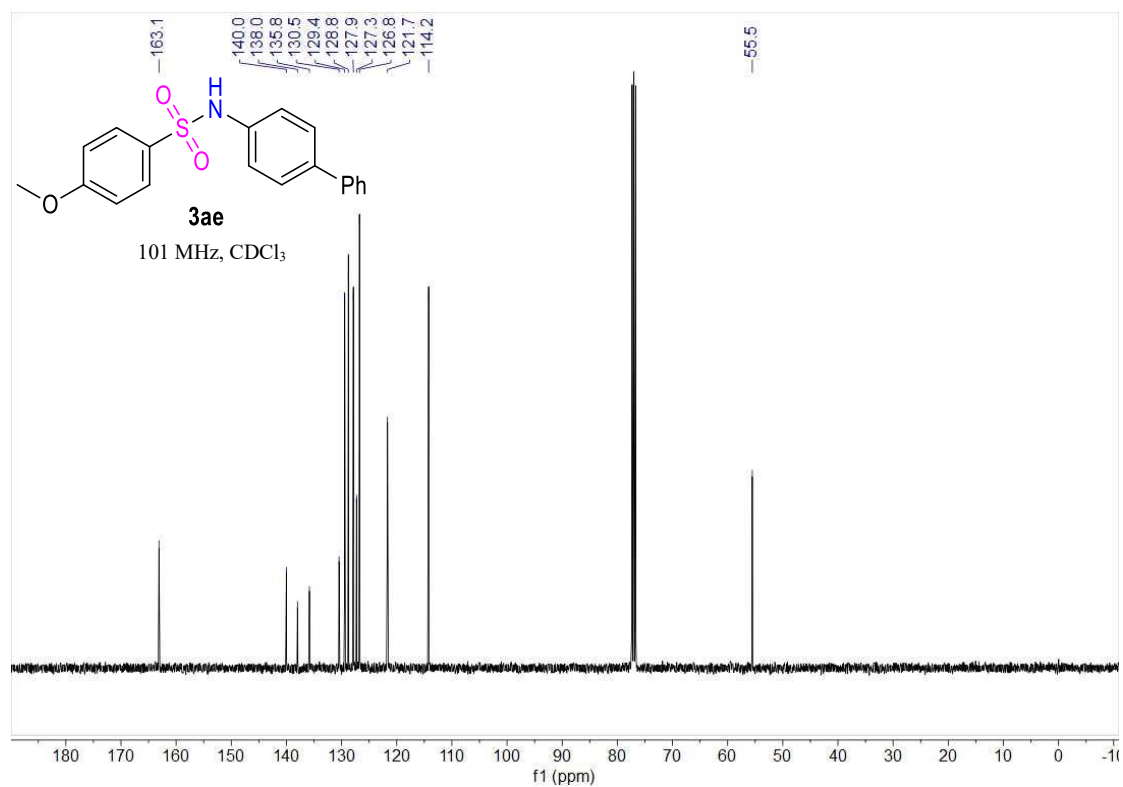

***N*-([1,1'-biphenyl]-4-yl)-4-(*tert*-butyl)benzenesulfonamide (3af)**

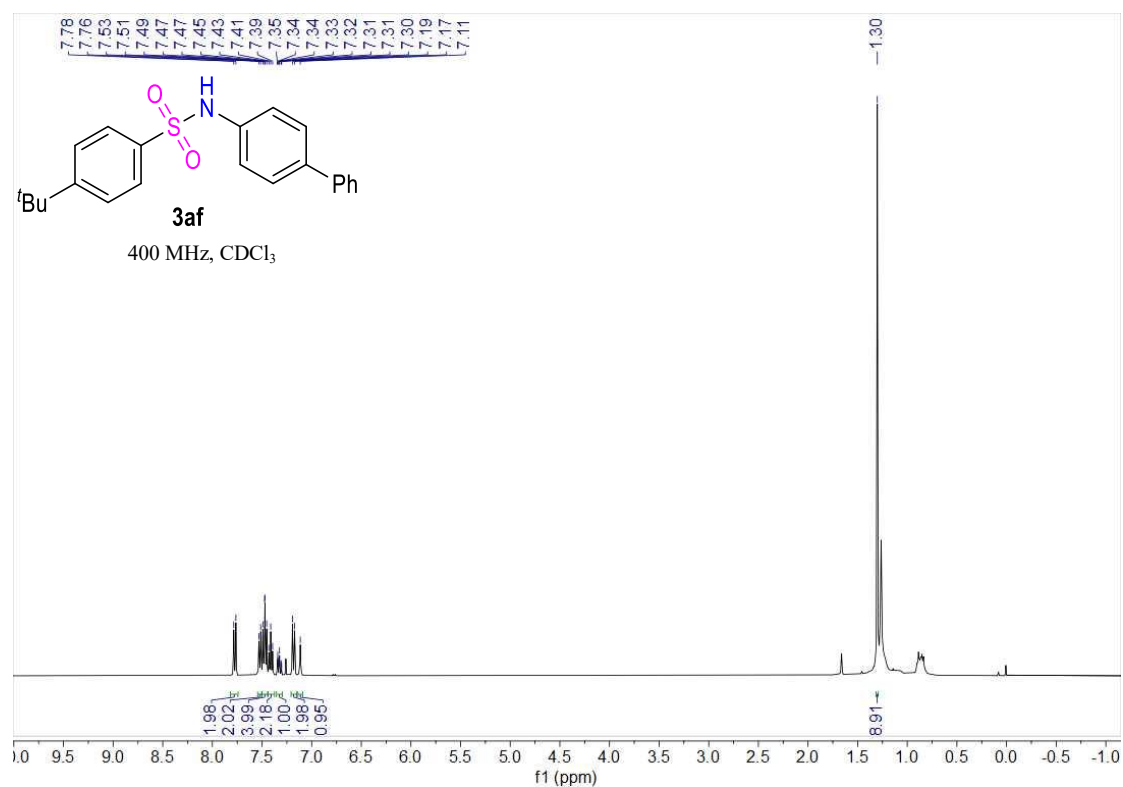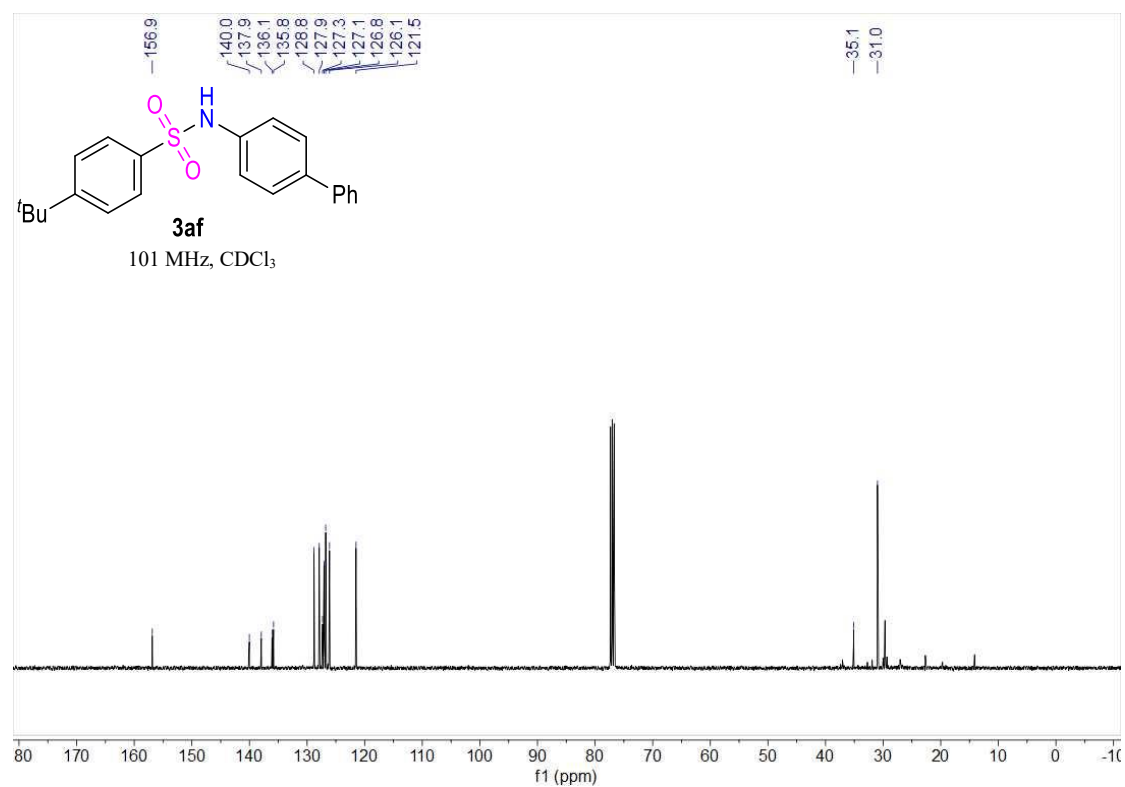

***N*-([1,1'-biphenyl]-4-yl)-4-fluorobenzenesulfonamide (3ag)**

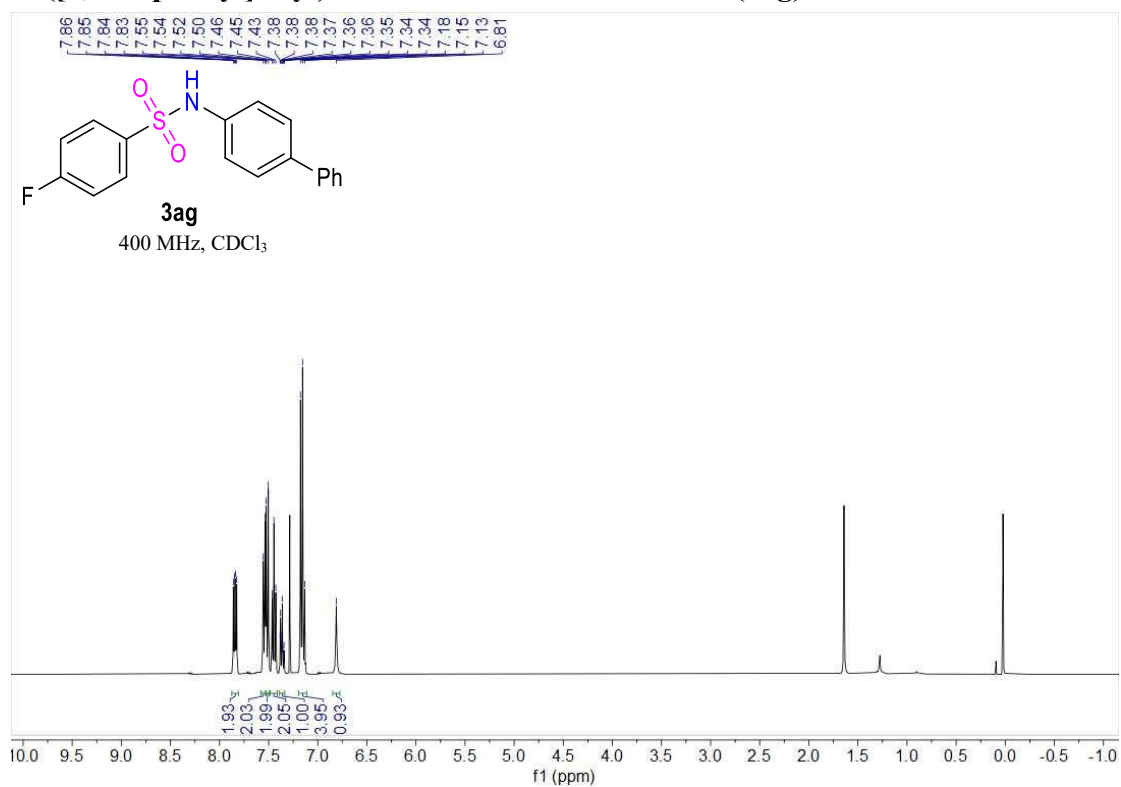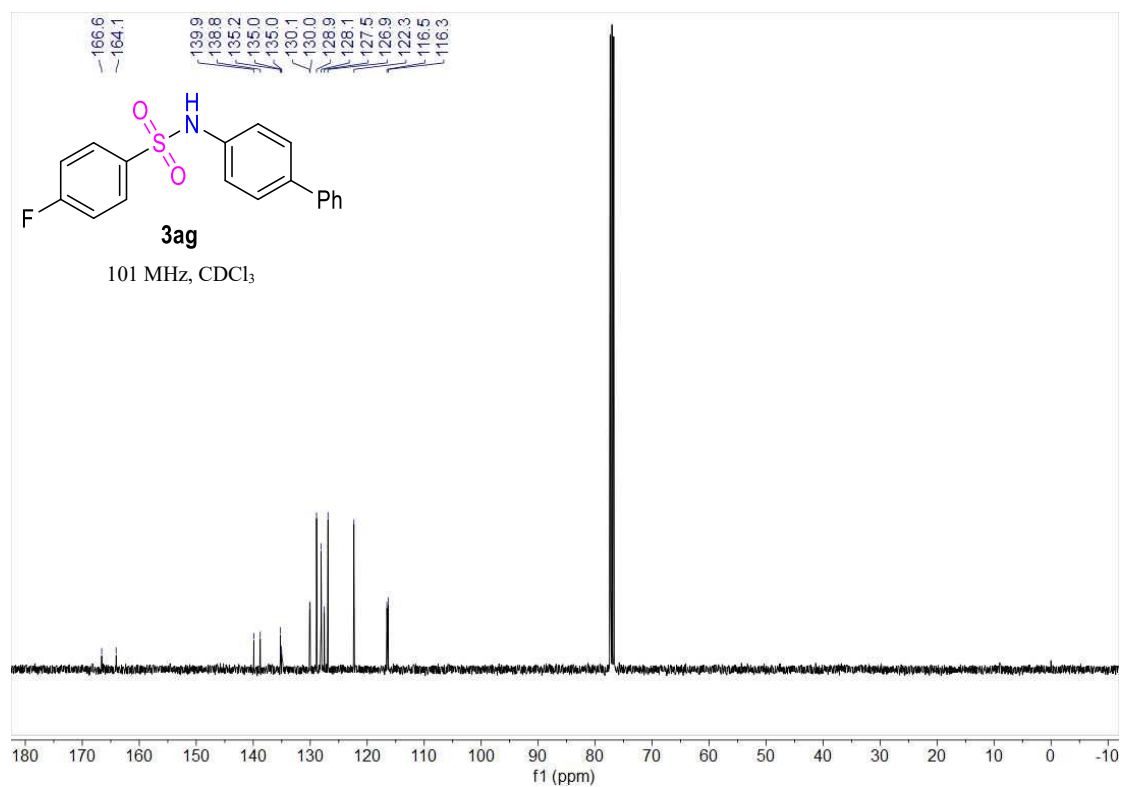



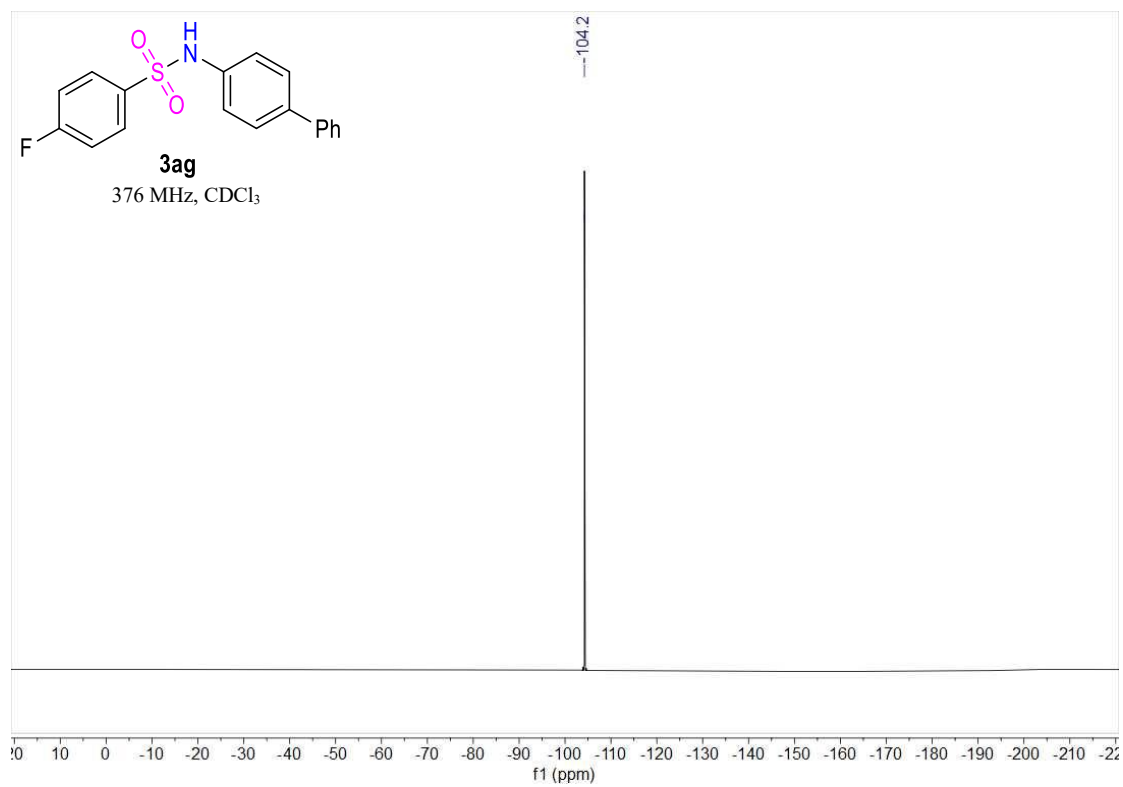

***N*-([1,1'-biphenyl]-4-yl)-4-chlorobenzenesulfonamide (3ah)**

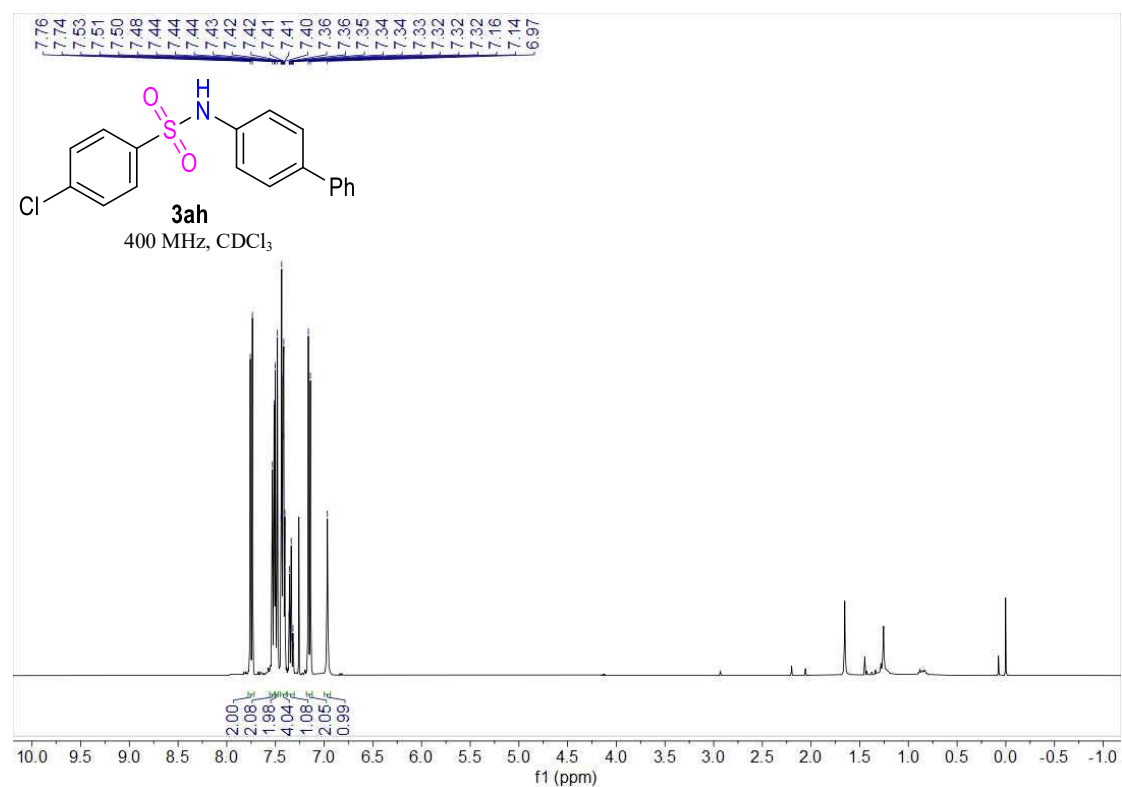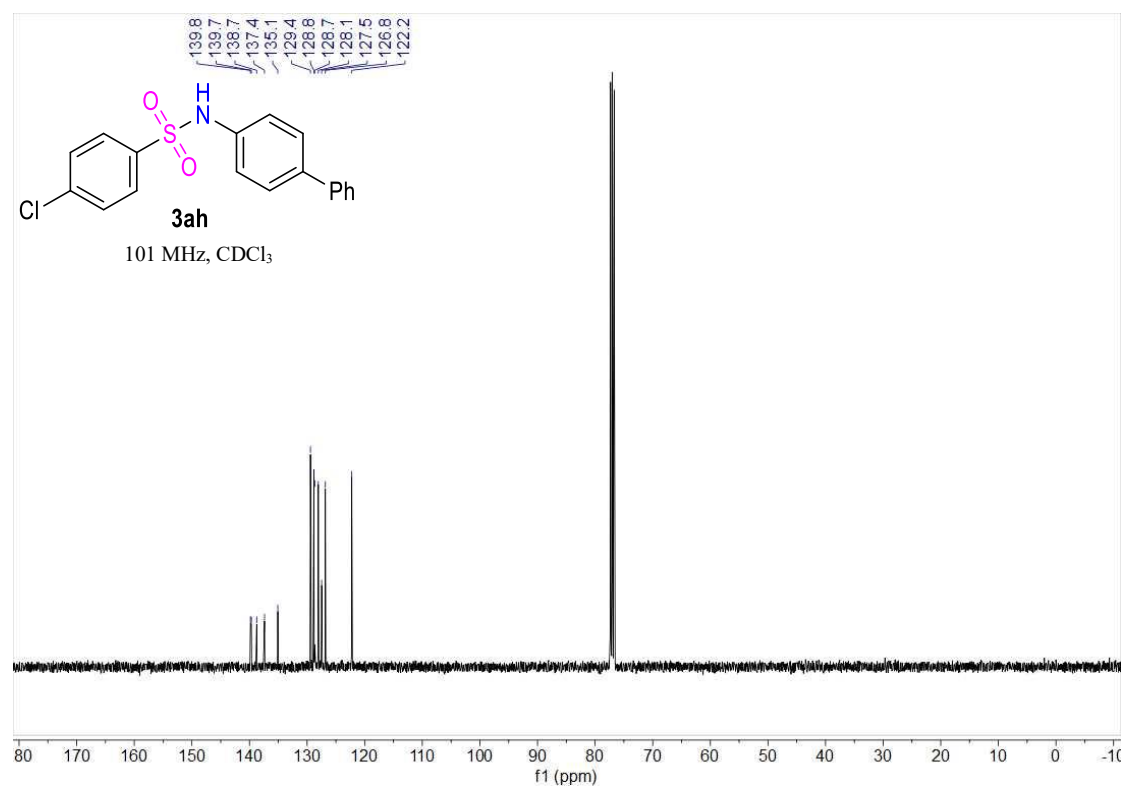

***N*-([1,1'-biphenyl]-4-yl)-4-(trifluoromethyl)benzenesulfonamide (3ai)**

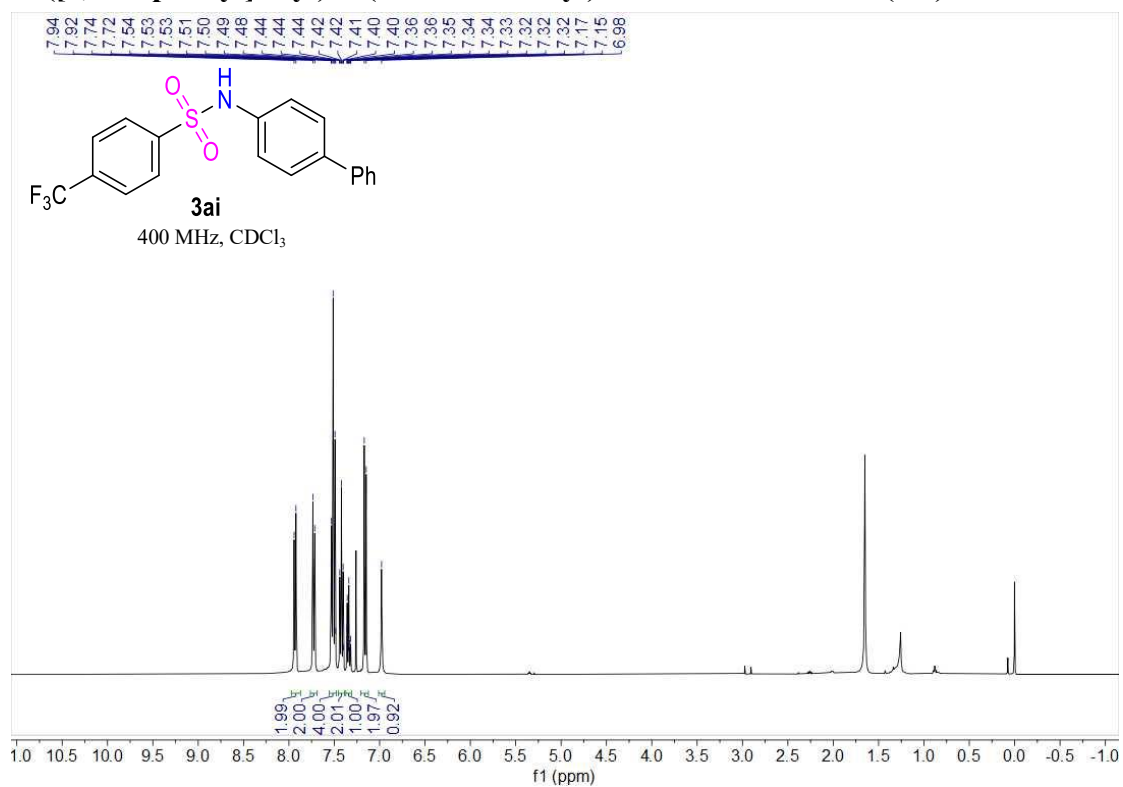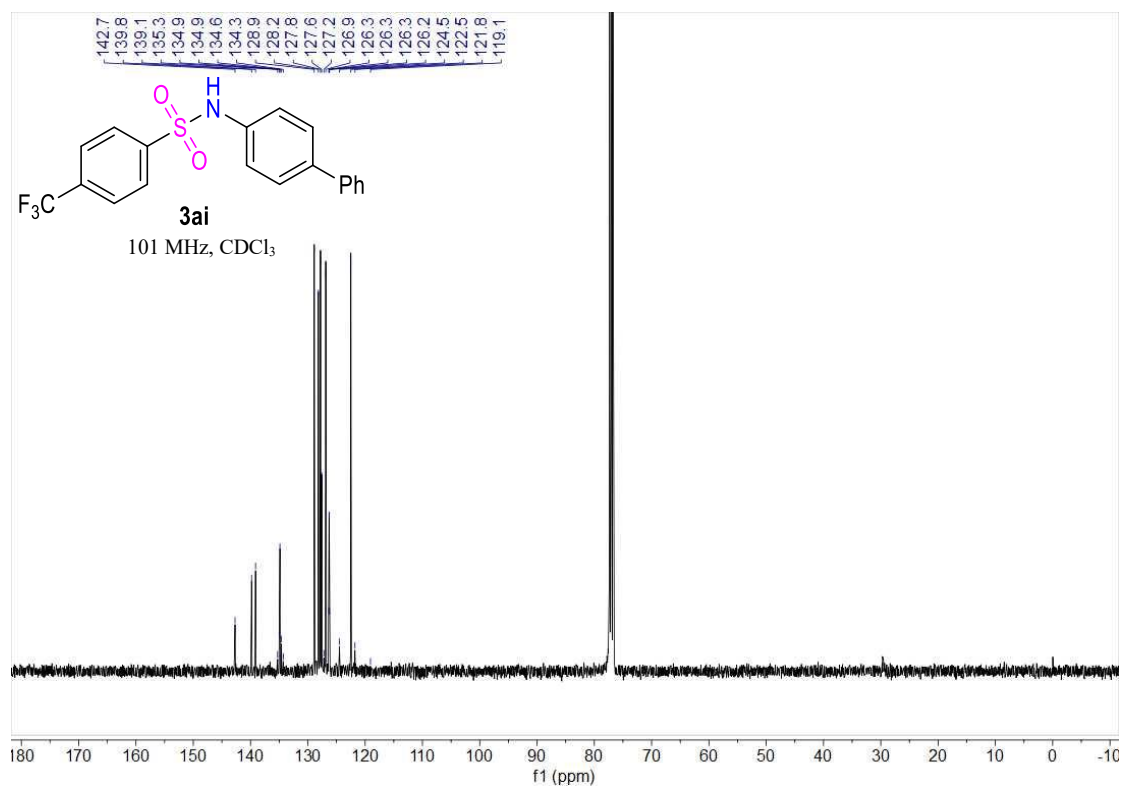

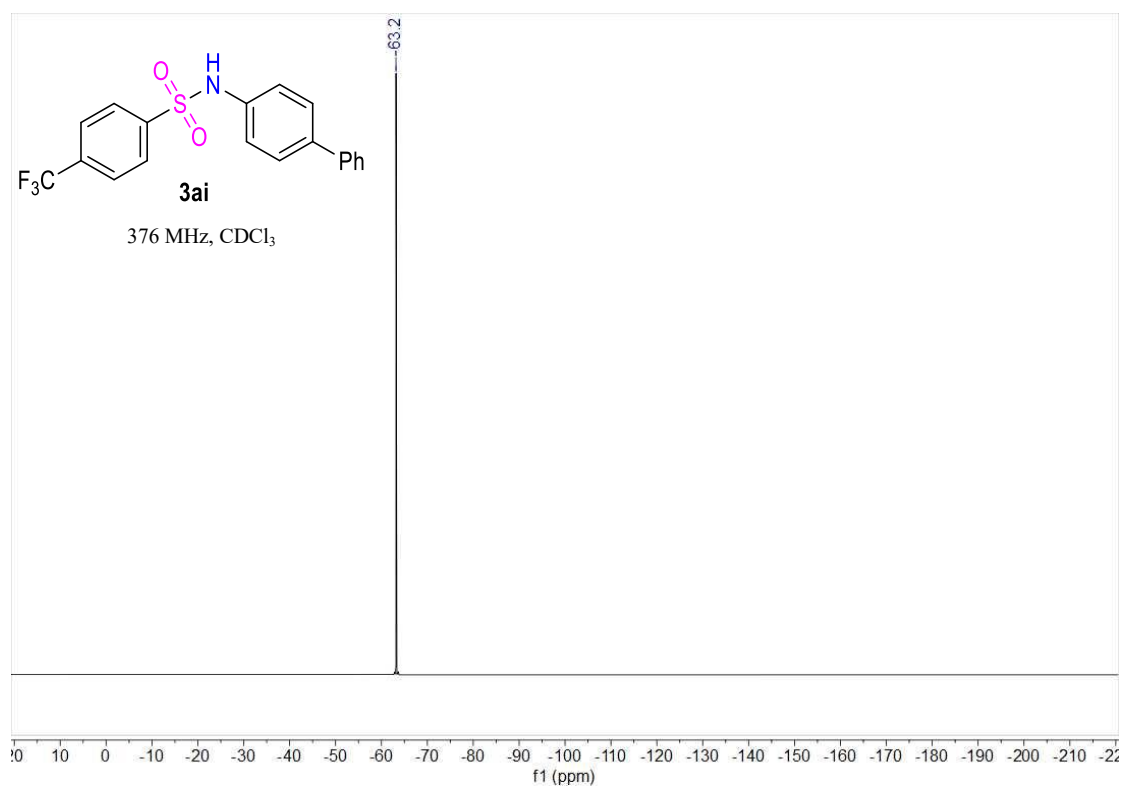

***N*-([1,1'-biphenyl]-4-yl)-3-methylbenzenesulfonamide (3aj)**

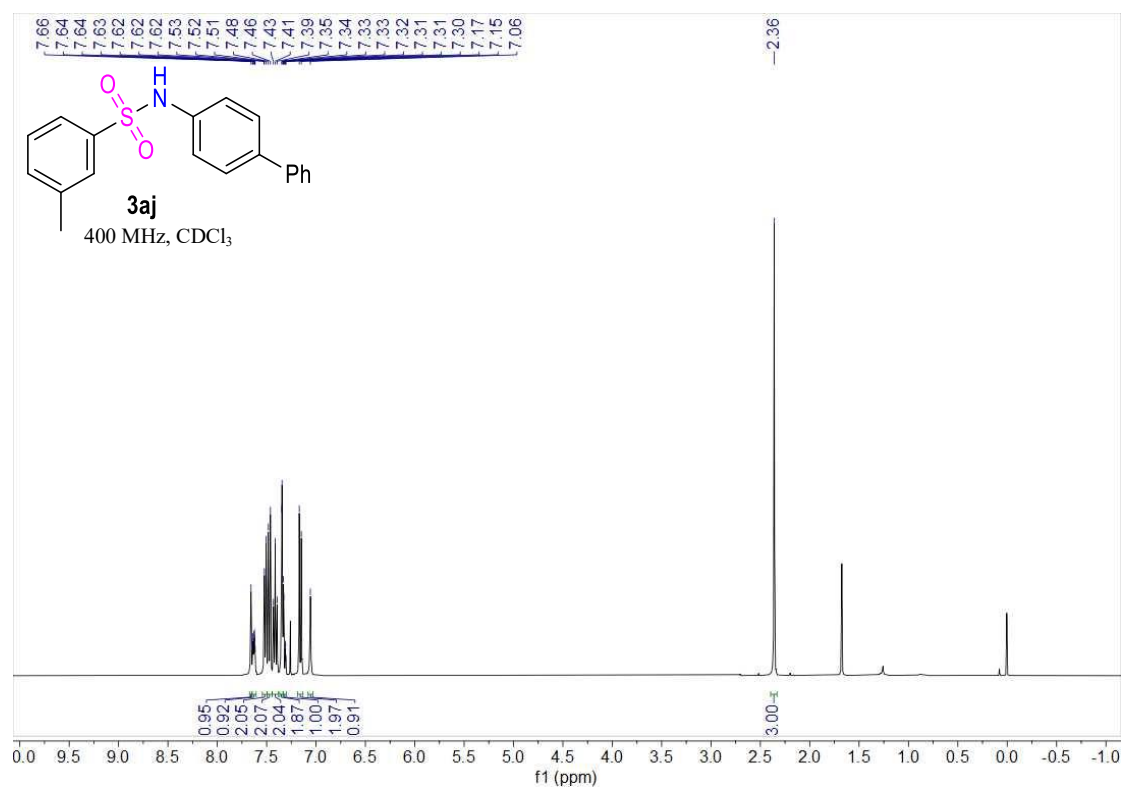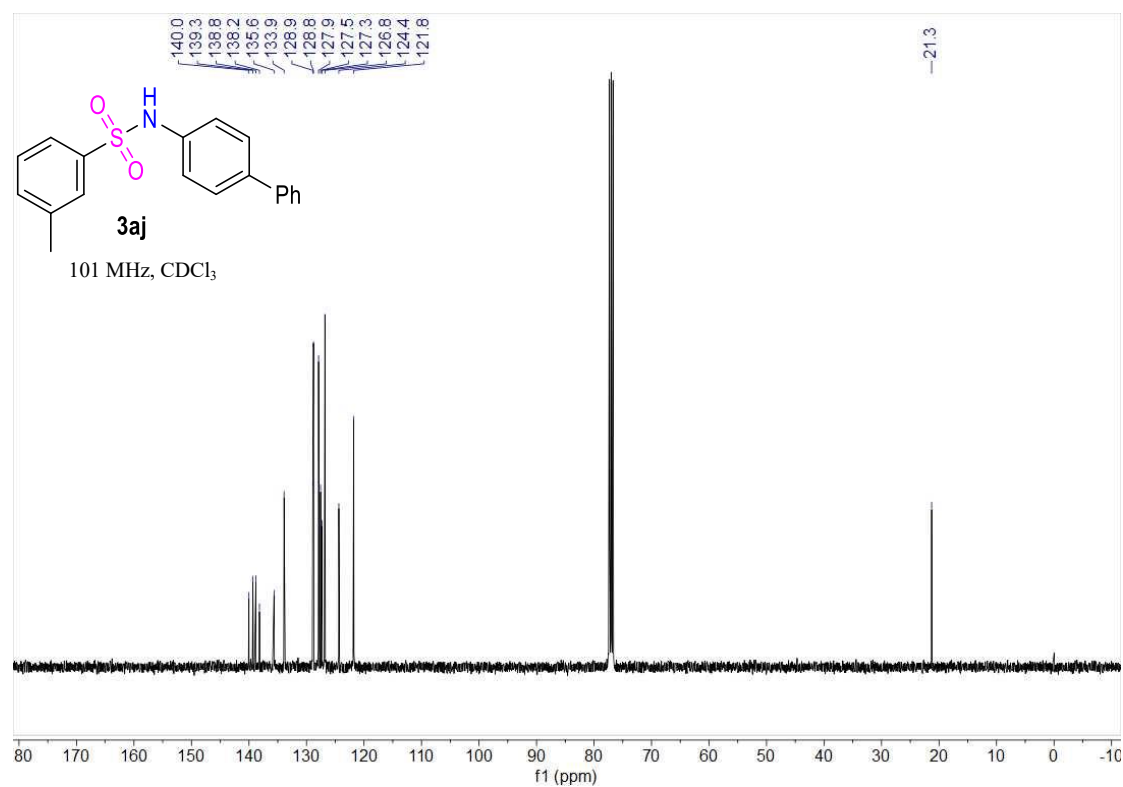

***N*-([1,1'-biphenyl]-4-yl)-3-methoxybenzenesulfonamide (3ak)**

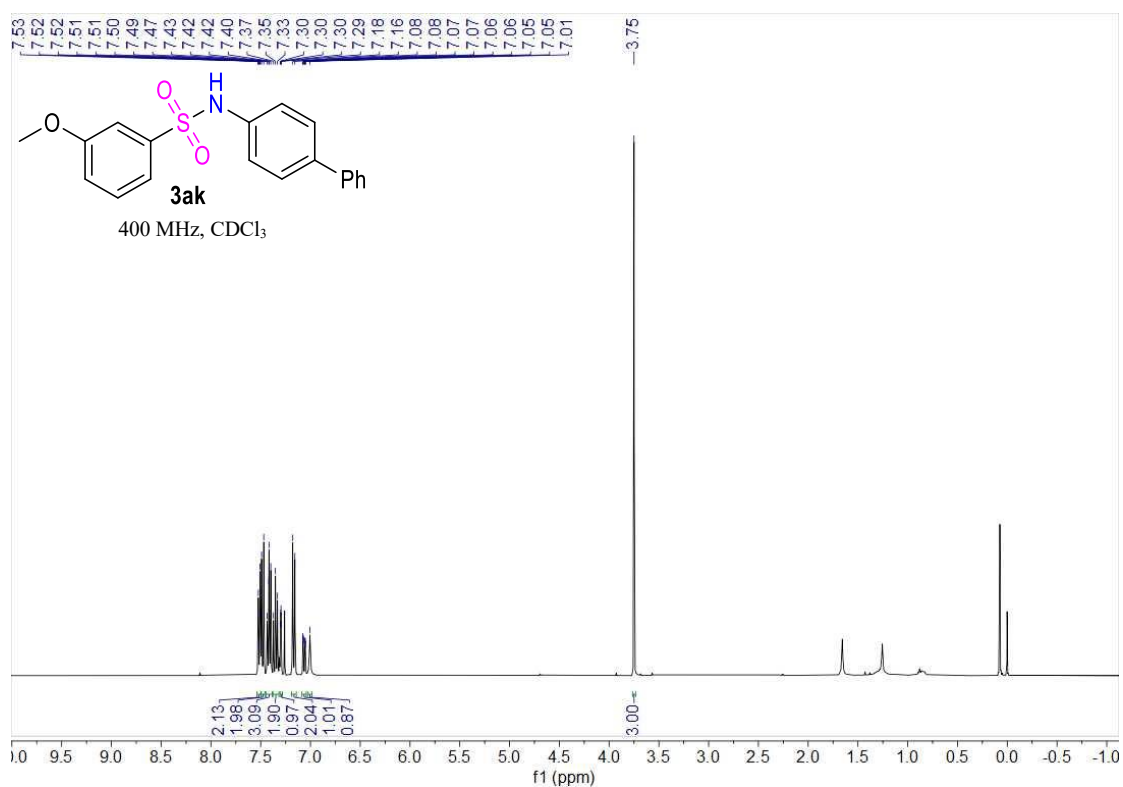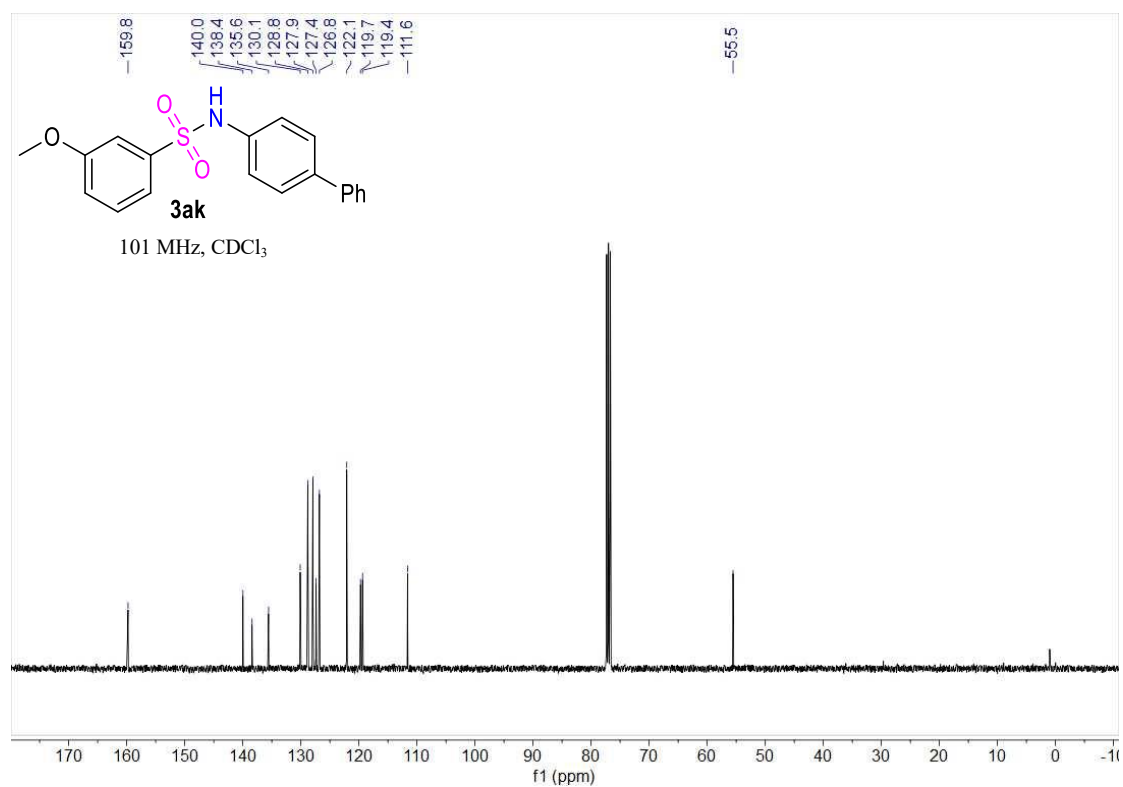

***N*-([1,1'-biphenyl]-4-yl)-3-chlorobenzenesulfonamide (3aI)**

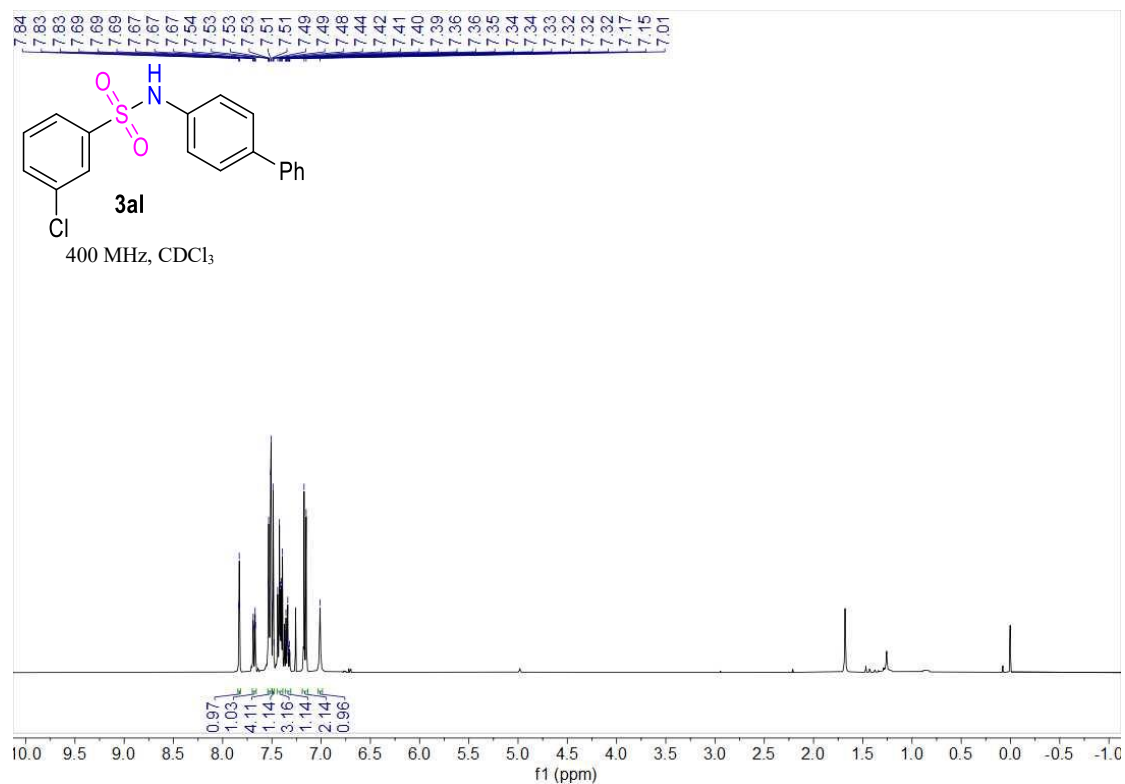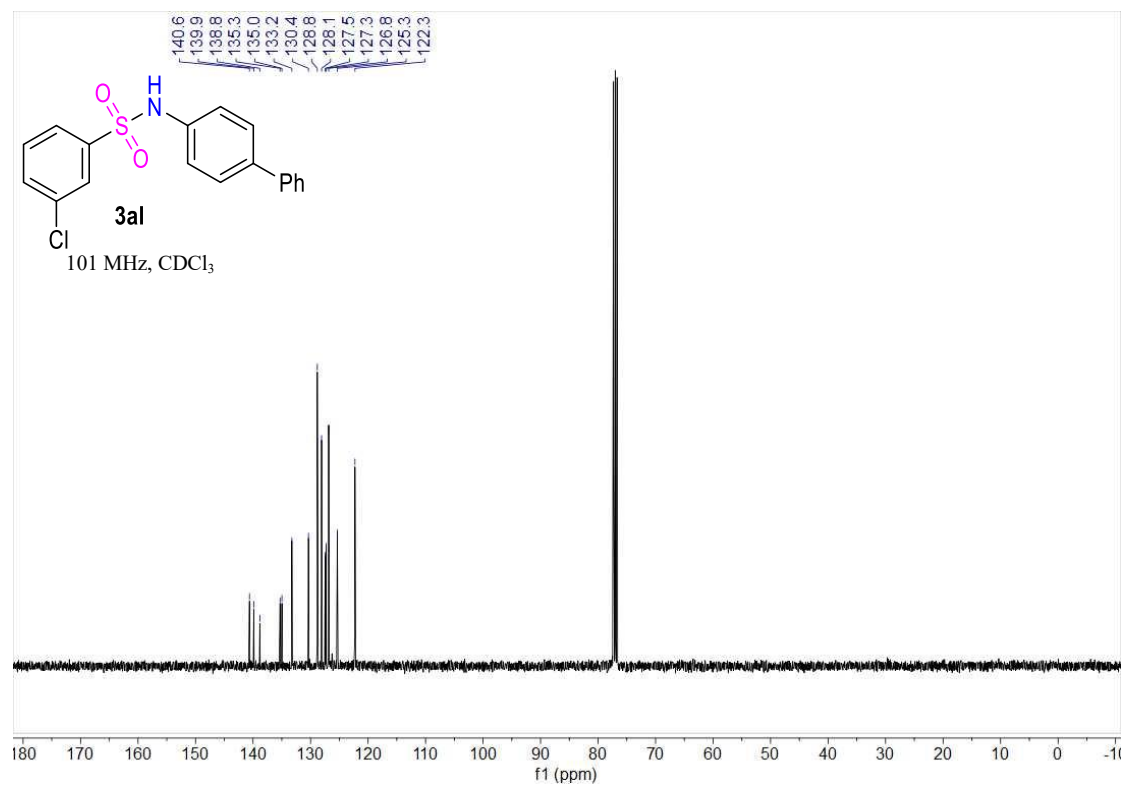

***N*-([1,1'-biphenyl]-4-yl)-2-methylbenzenesulfonamide (3am)**

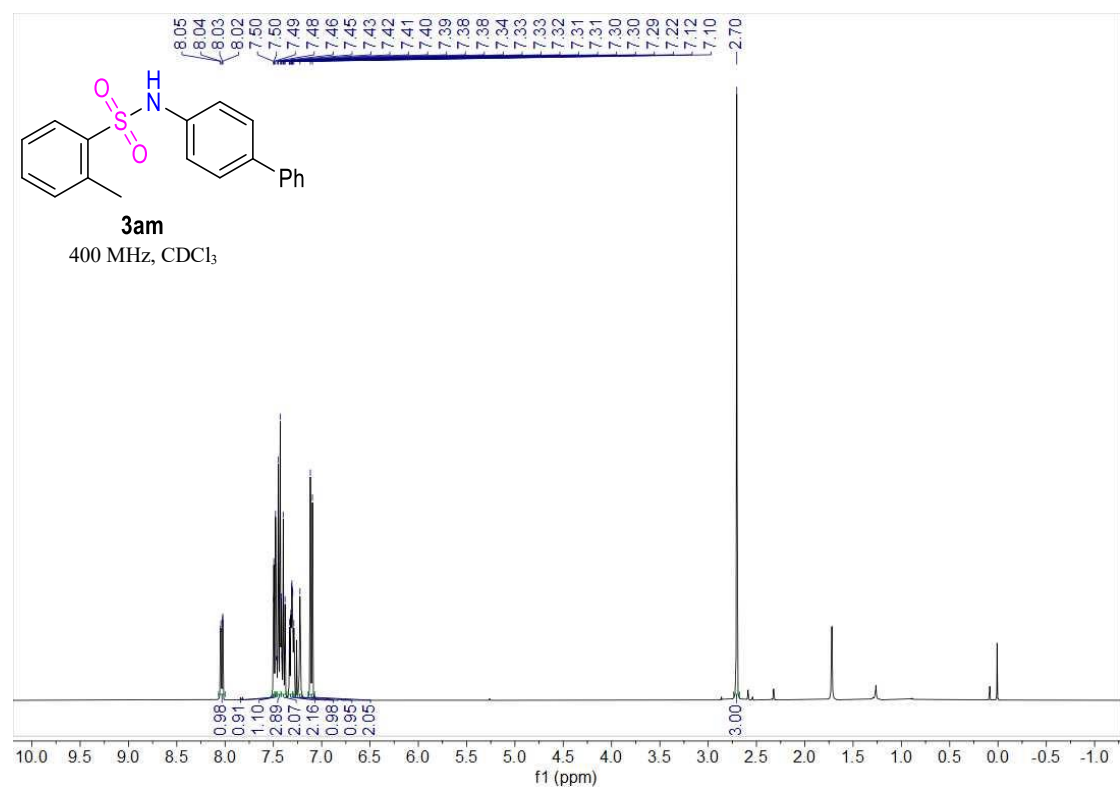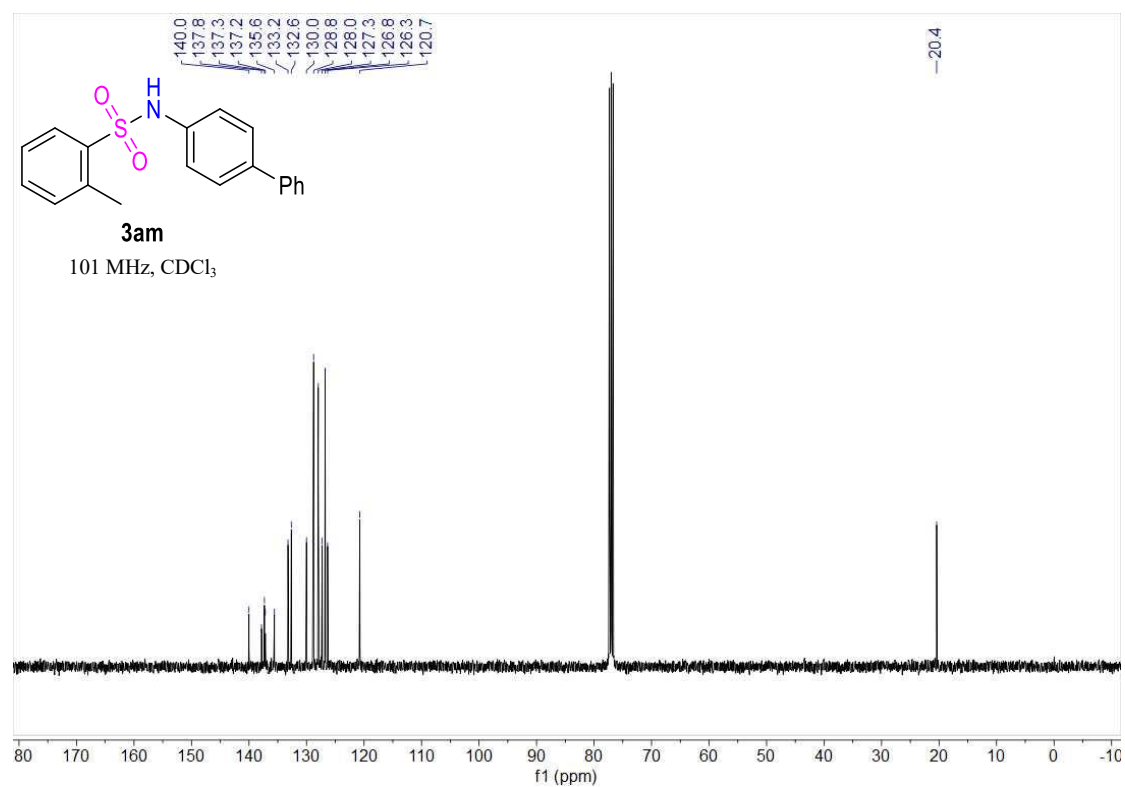



***N*-([1,1'-biphenyl]-4-yl)-2-methoxybenzenesulfonamide (3an)**

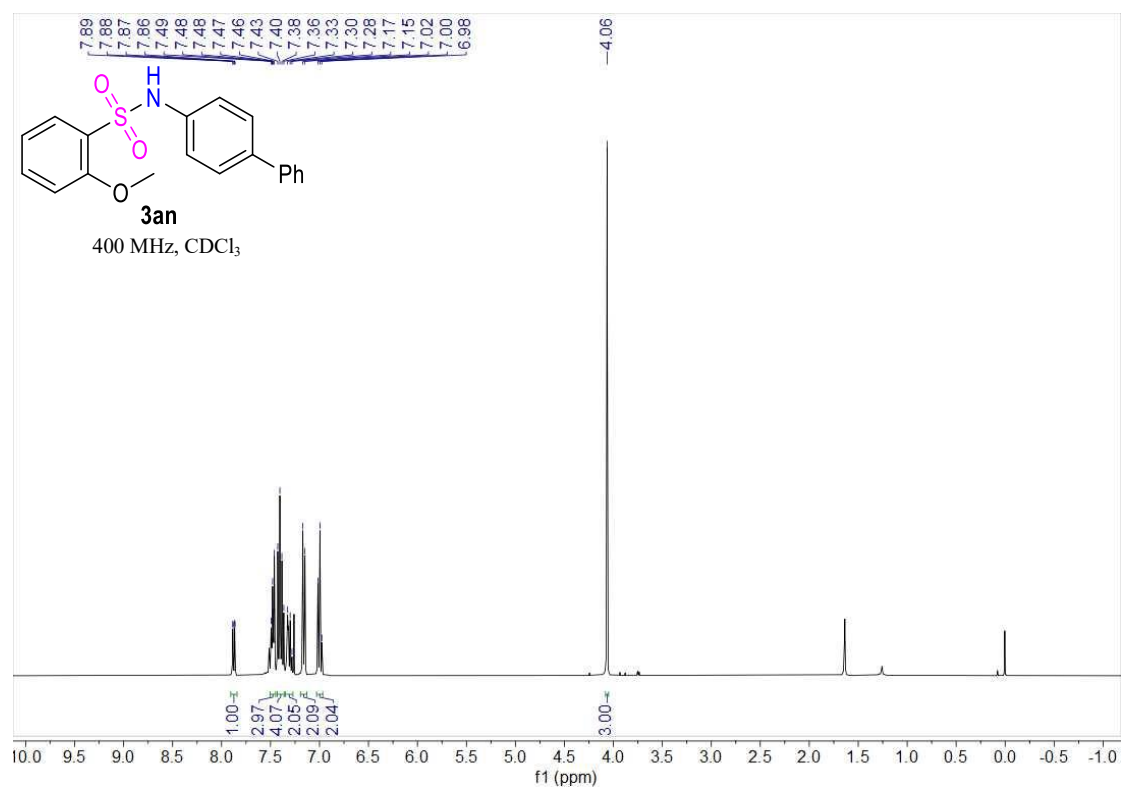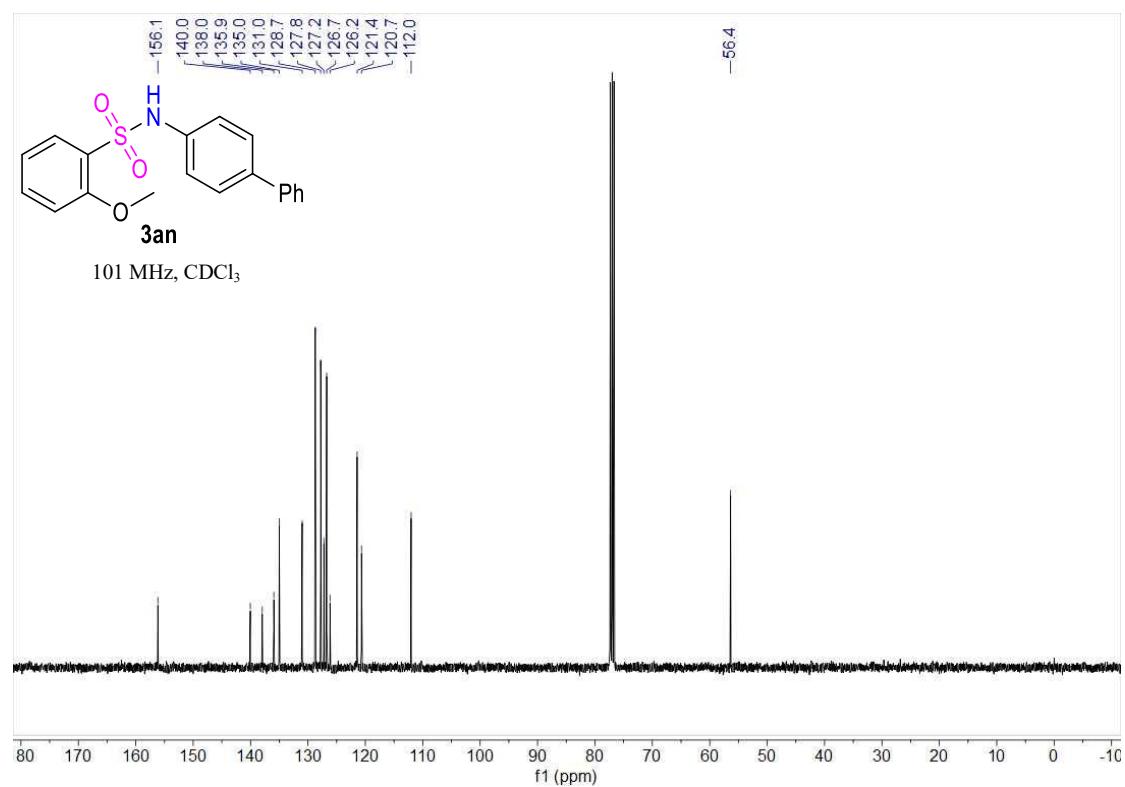

***N*-([1,1'-biphenyl]-4-yl)-2-fluorobenzenesulfonamide (3ao)**

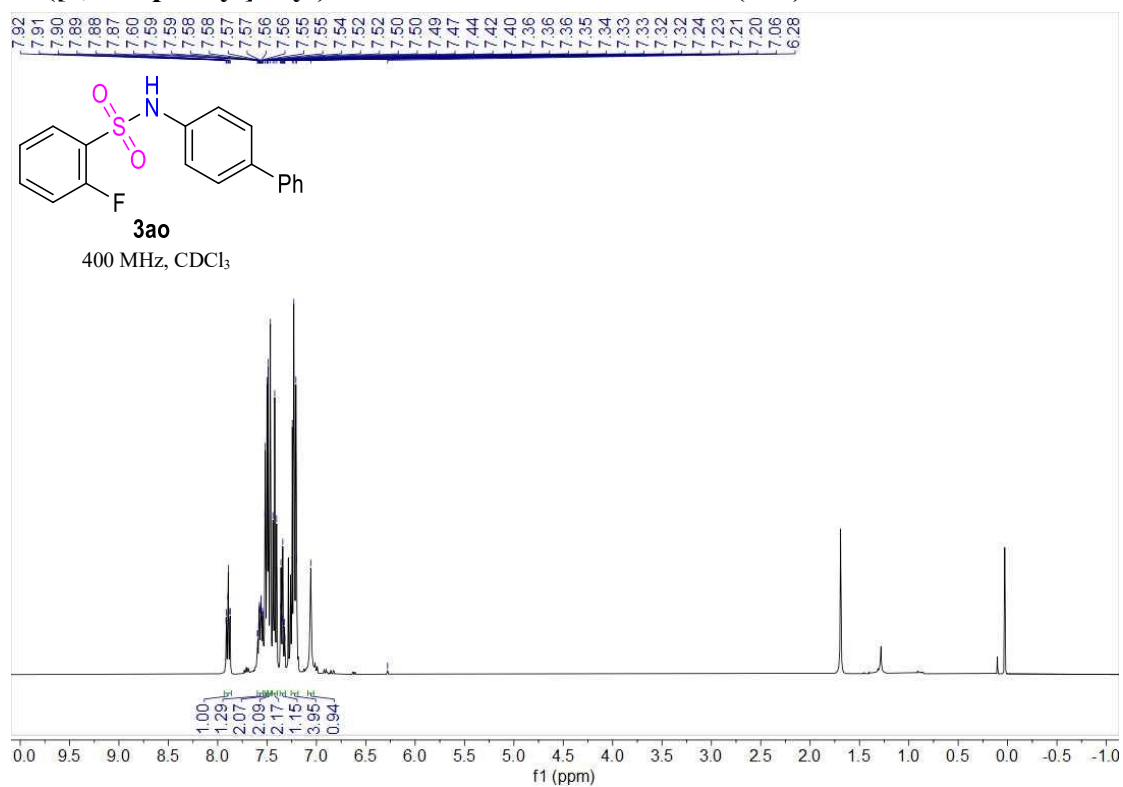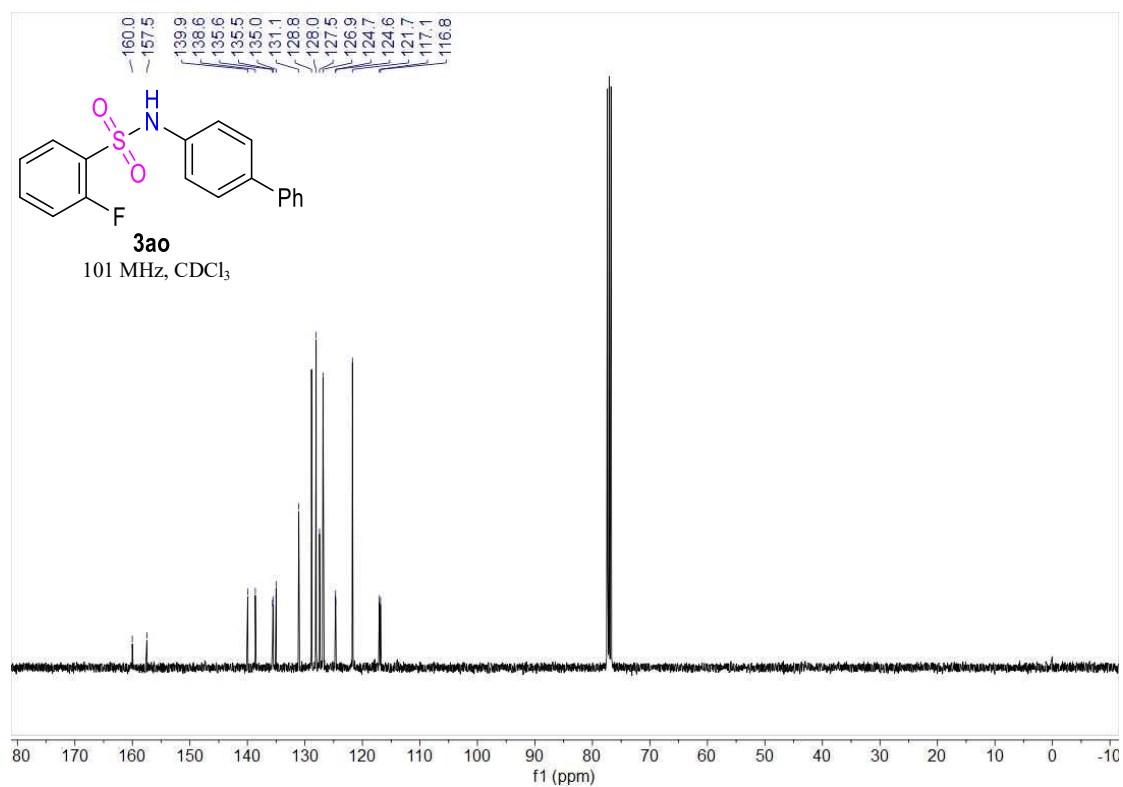

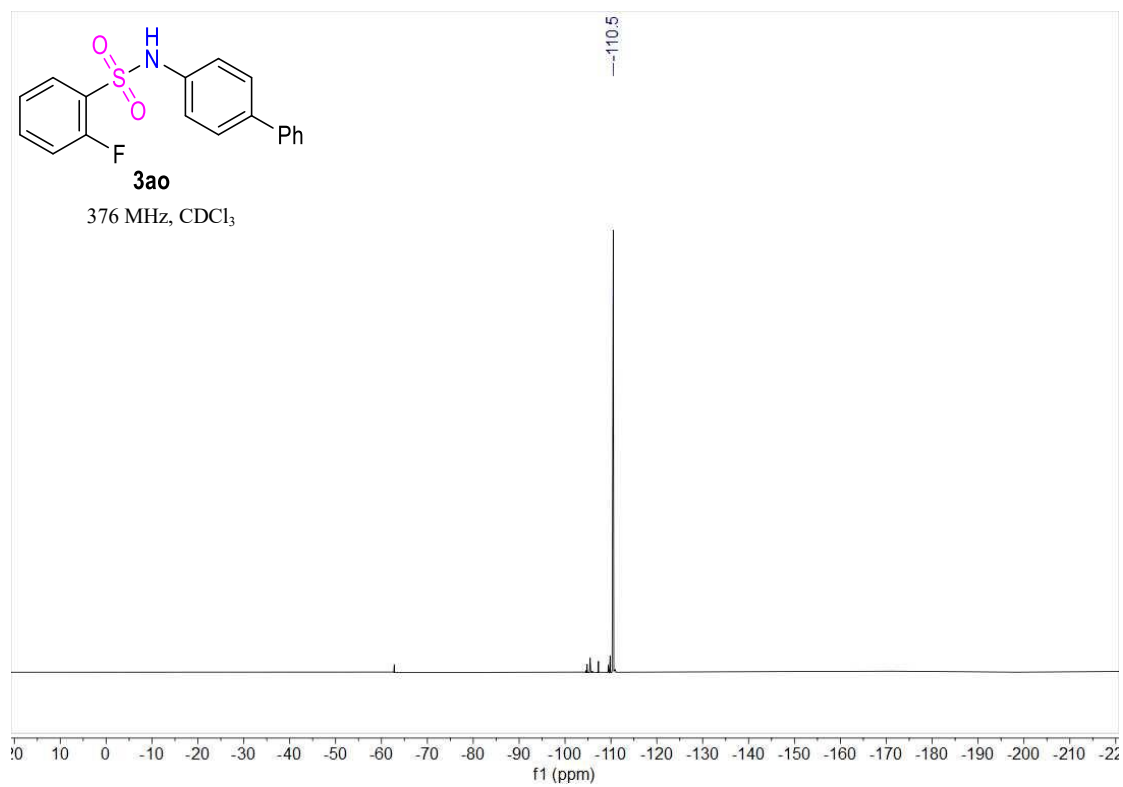

***N*-([1,1'-biphenyl]-4-yl)naphthalene-1-sulfonamide (3ap)**

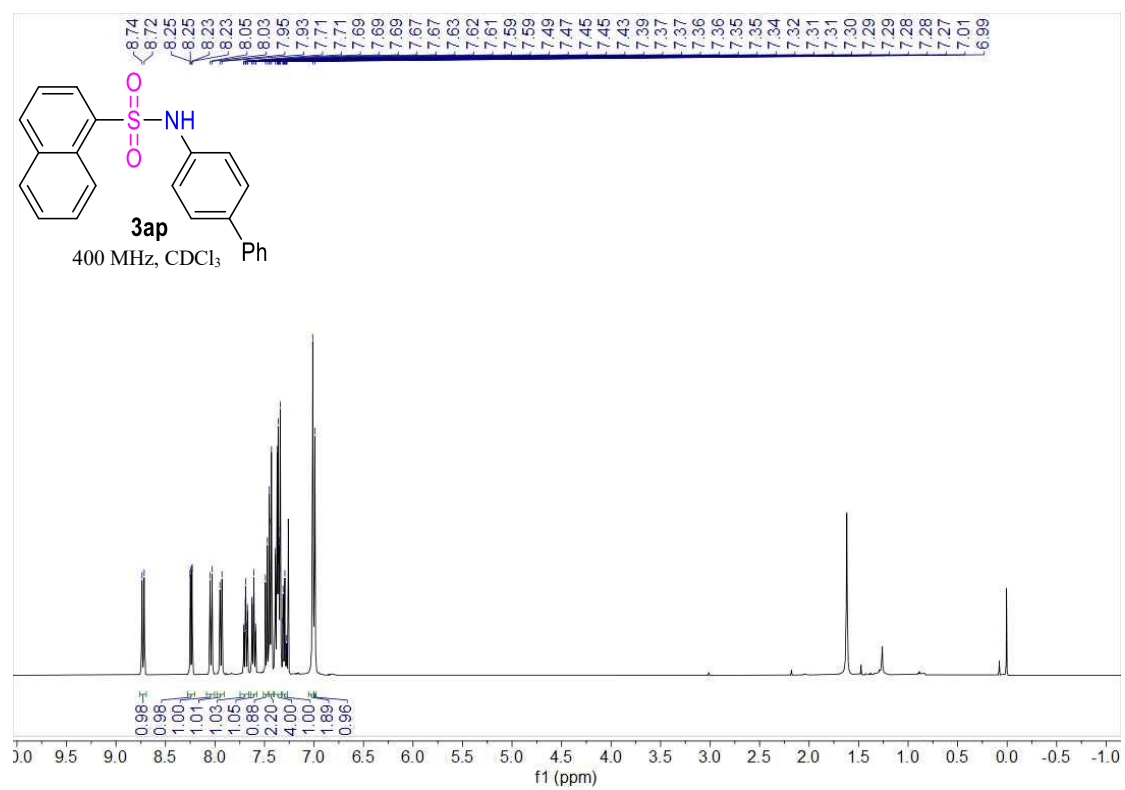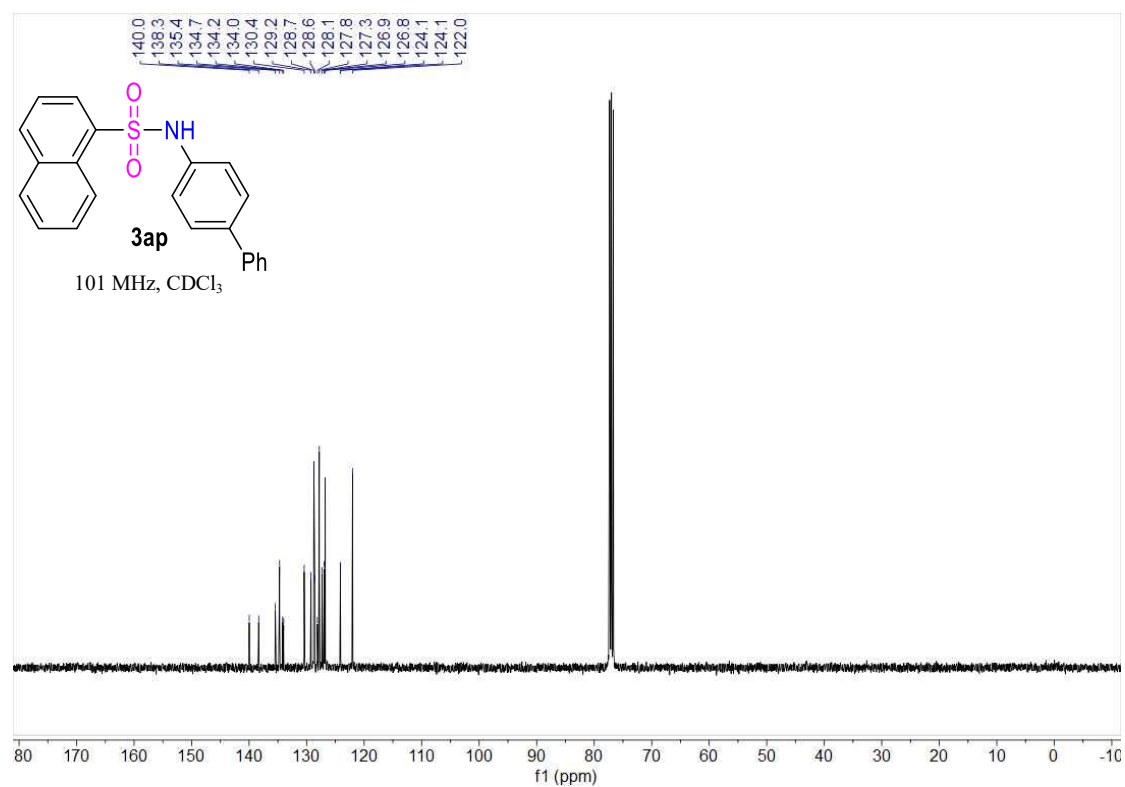

***N*-([1,1'-biphenyl]-4-yl)thiophene-2-sulfonamide (3aq)**

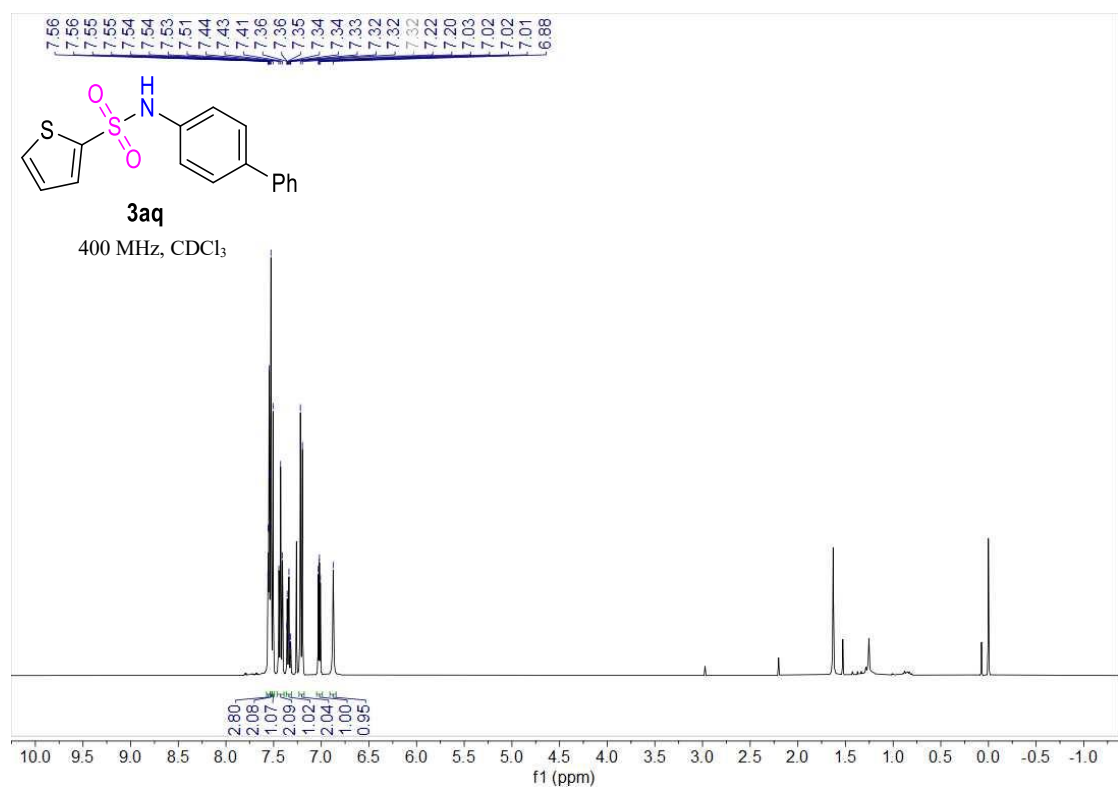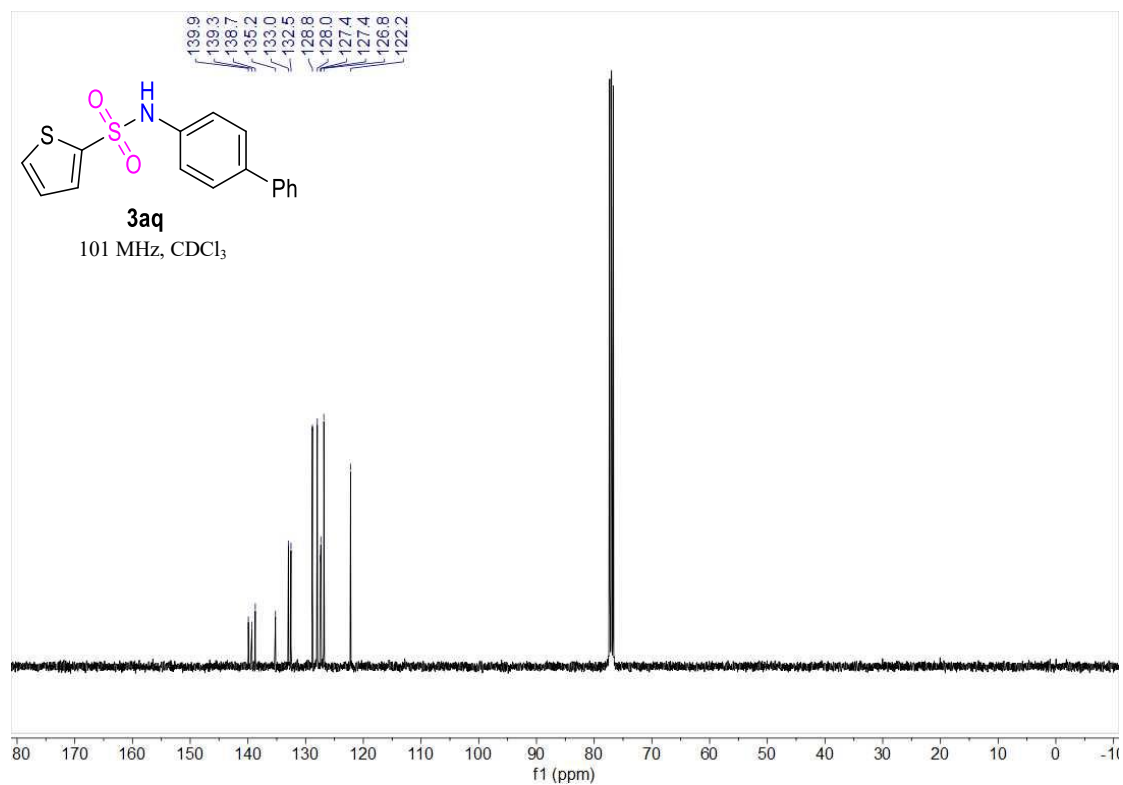

***N*-([1,1'-biphenyl]-4-yl)-2-methylfuran-3-sulfonamide (3ar)**

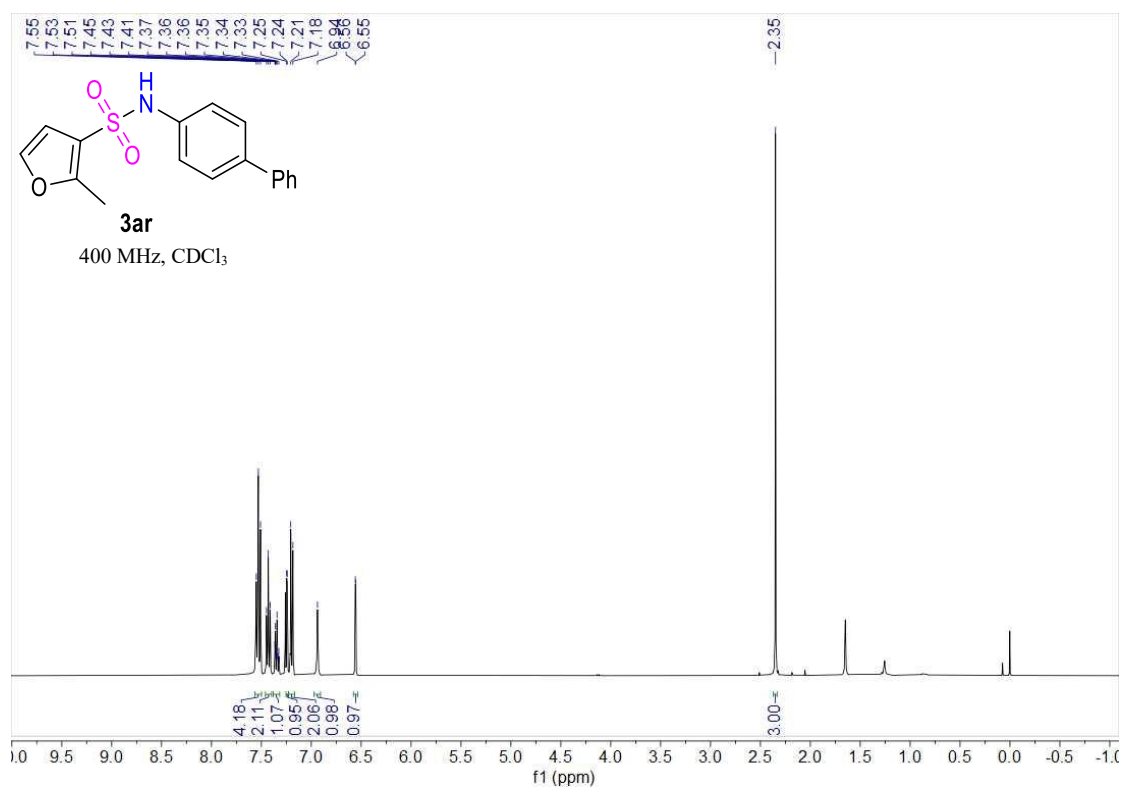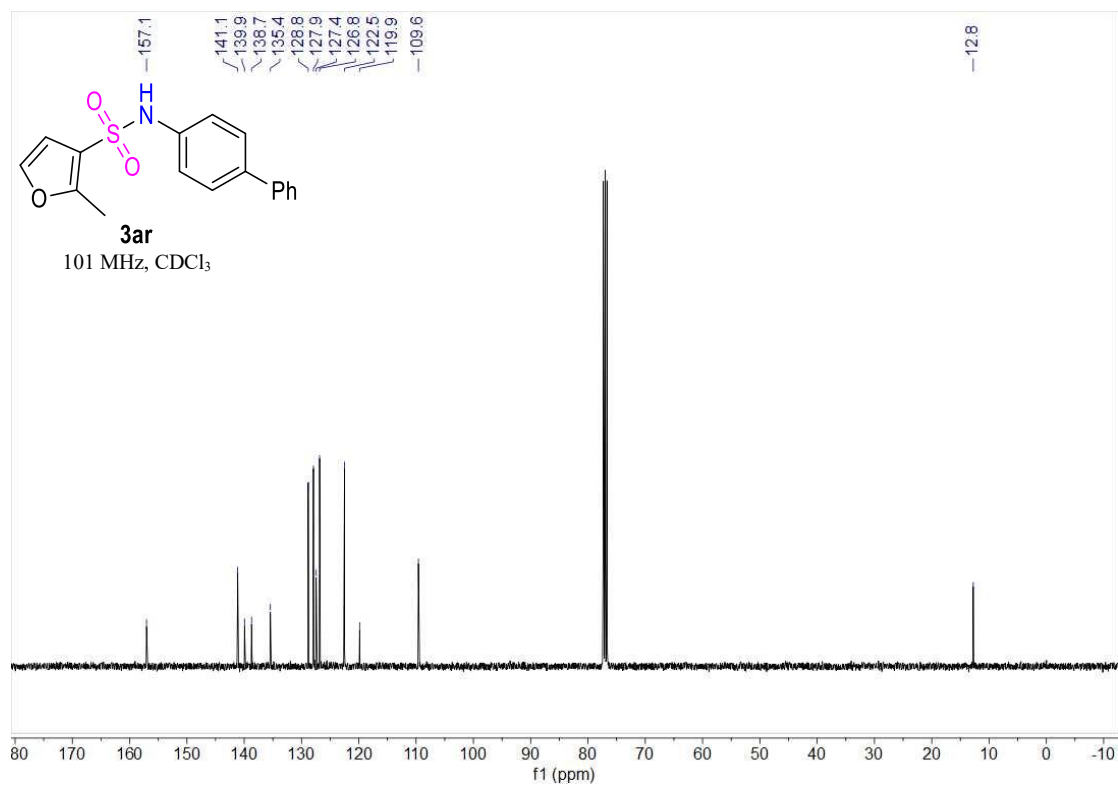

***N*-([1,1'-biphenyl]-4-yl)-4-aminobenzenesulfonamide (3as)**

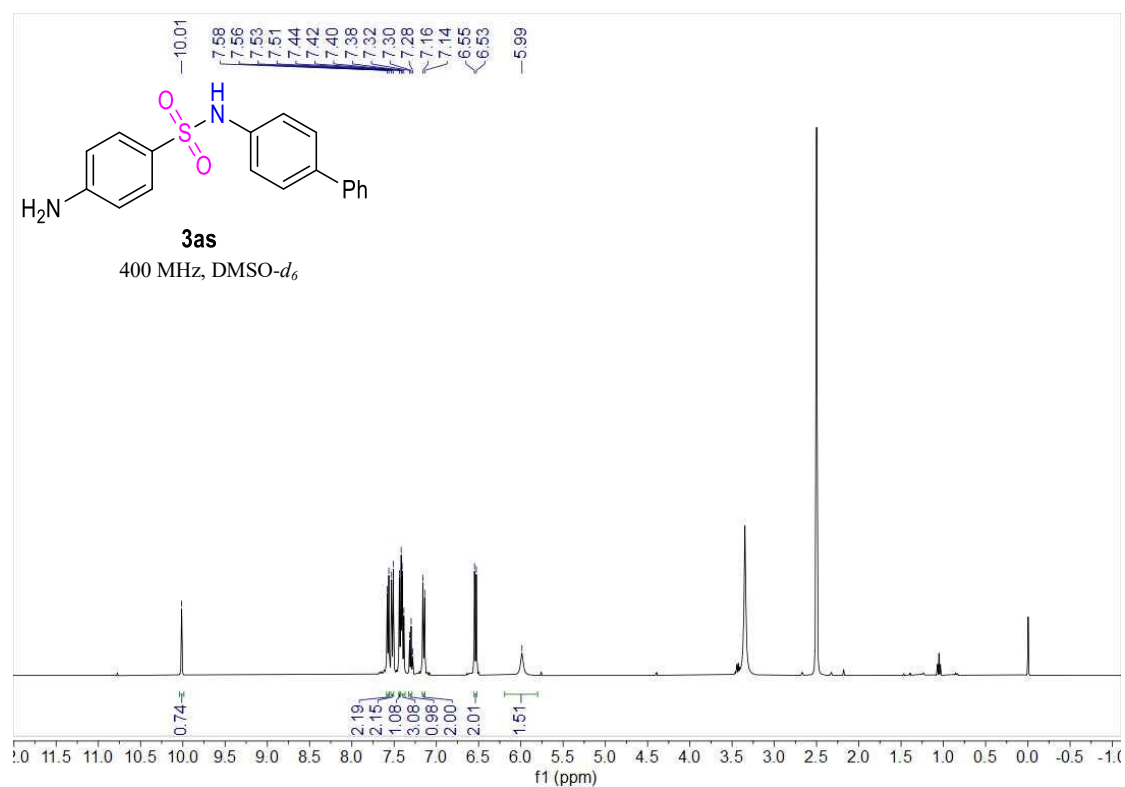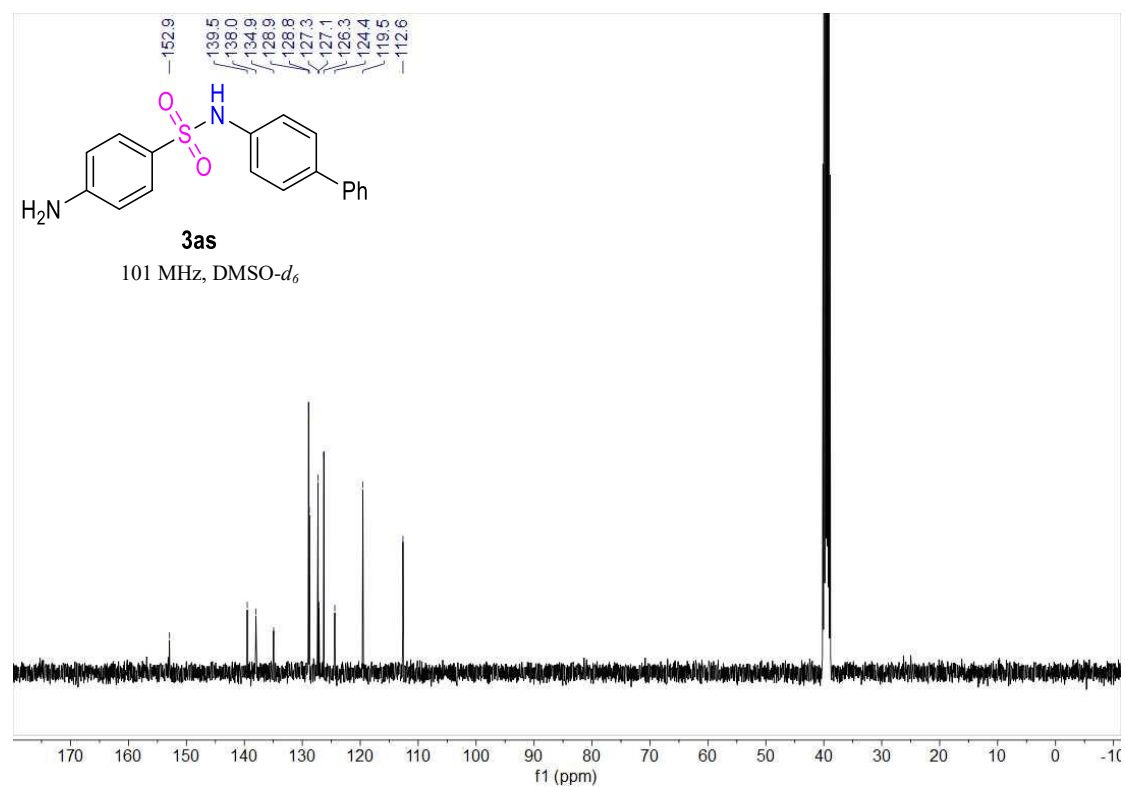

***N*-([1,1'-biphenyl]-4-yl)-3-aminobenzenesulfonamide (3at)**

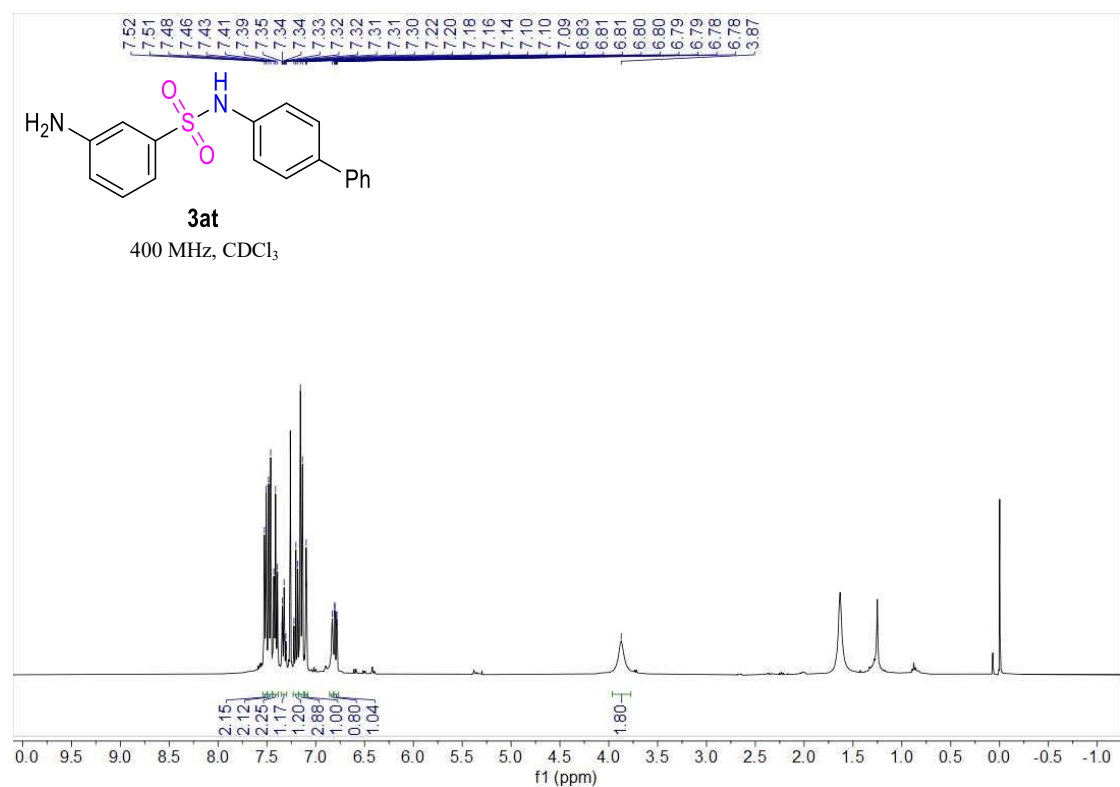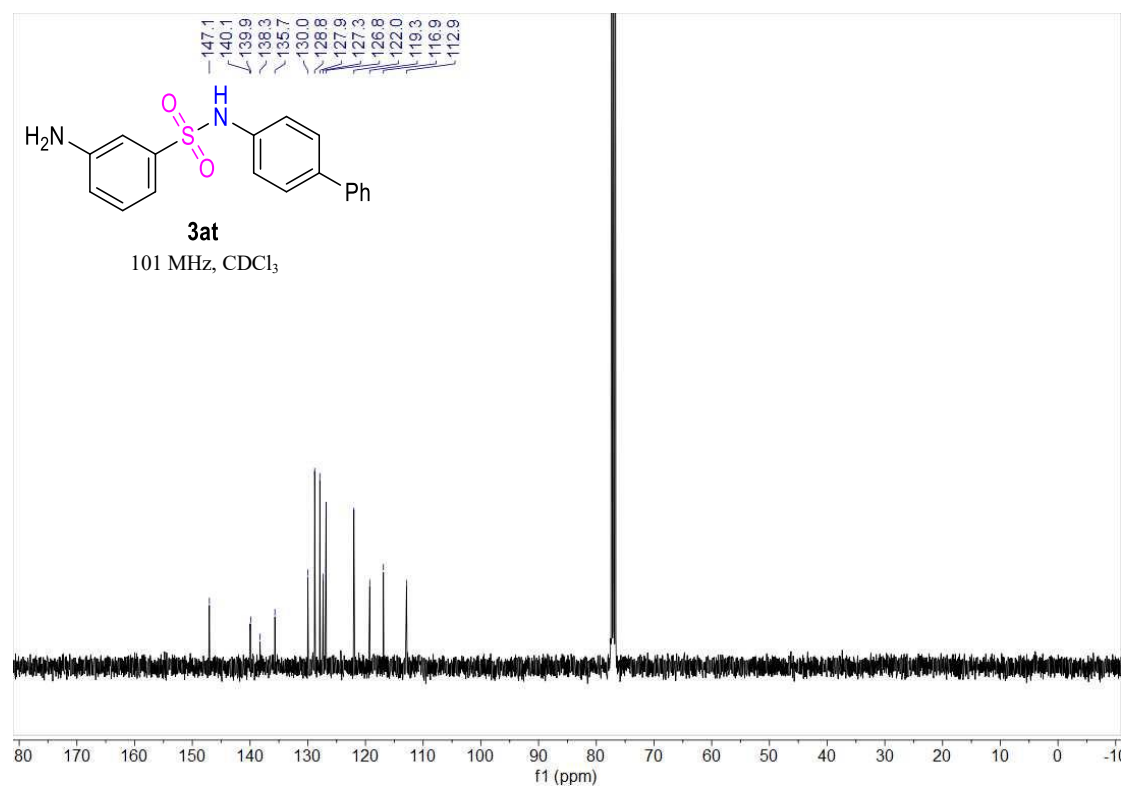



***N*-([1,1'-biphenyl]-4-yl)propane-1-sulfonamide (3au)**

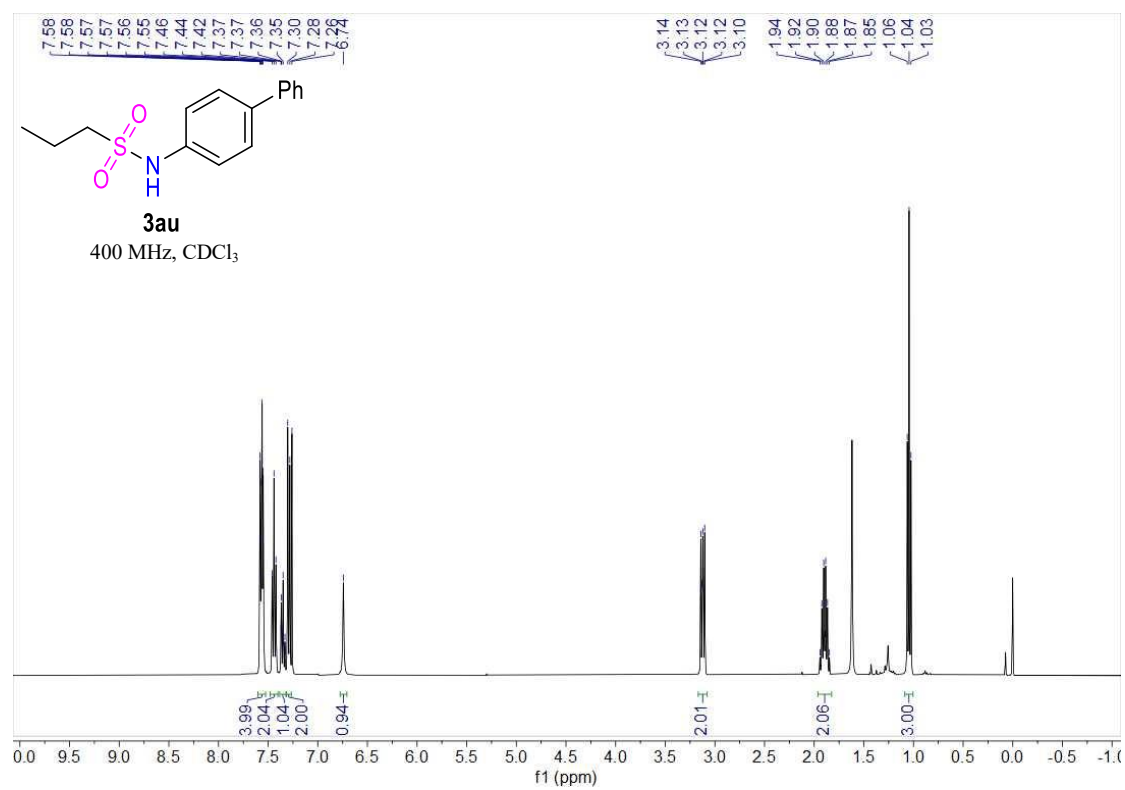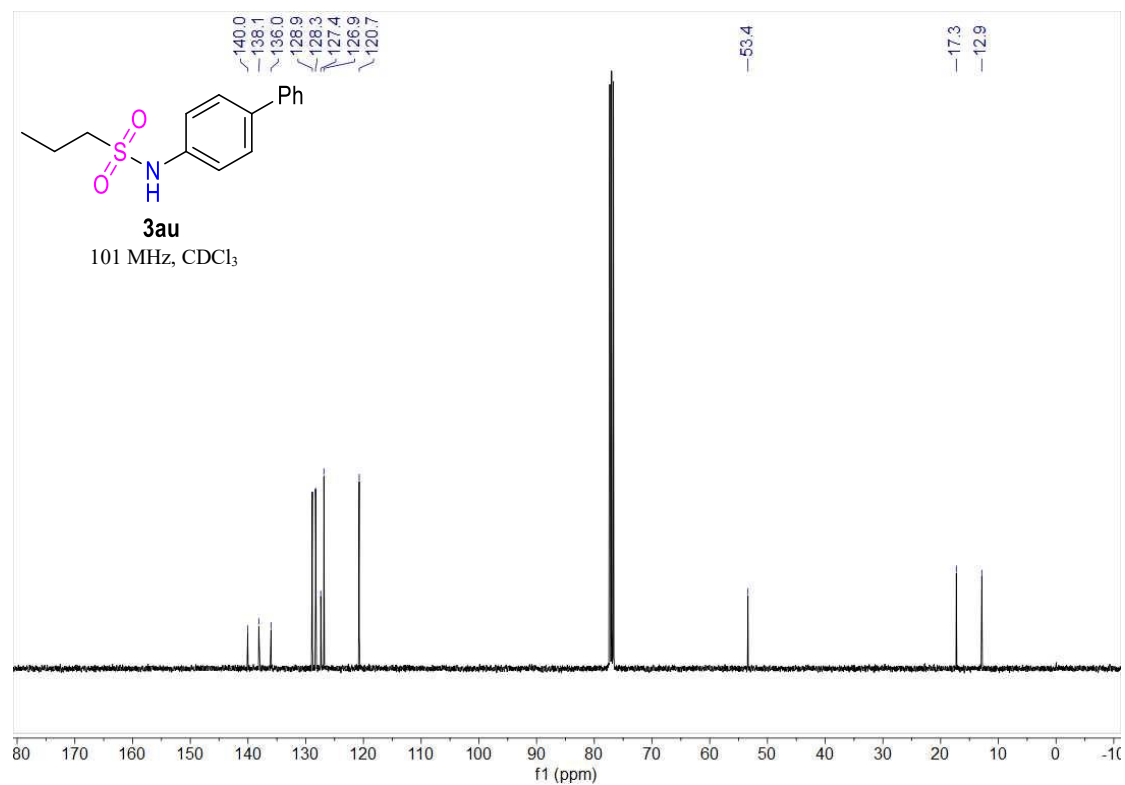

***N*-([1,1'-biphenyl]-4-yl)cyclohexanesulfonamide (3av)**

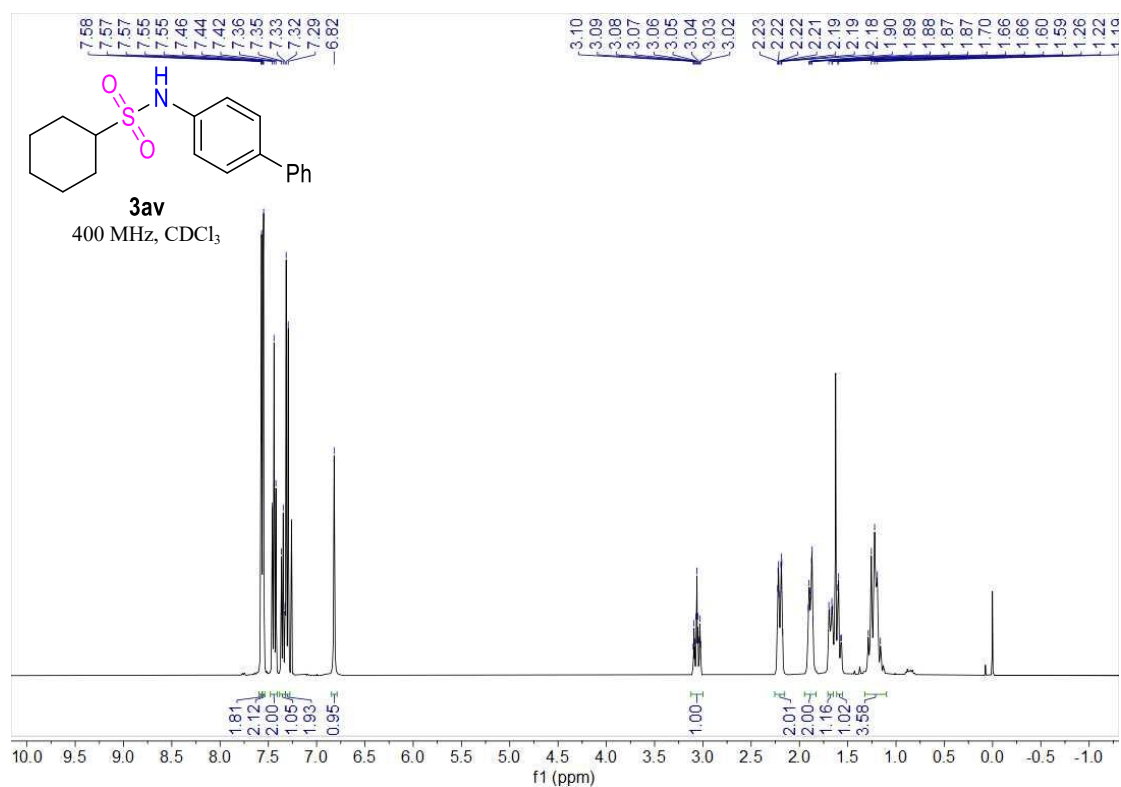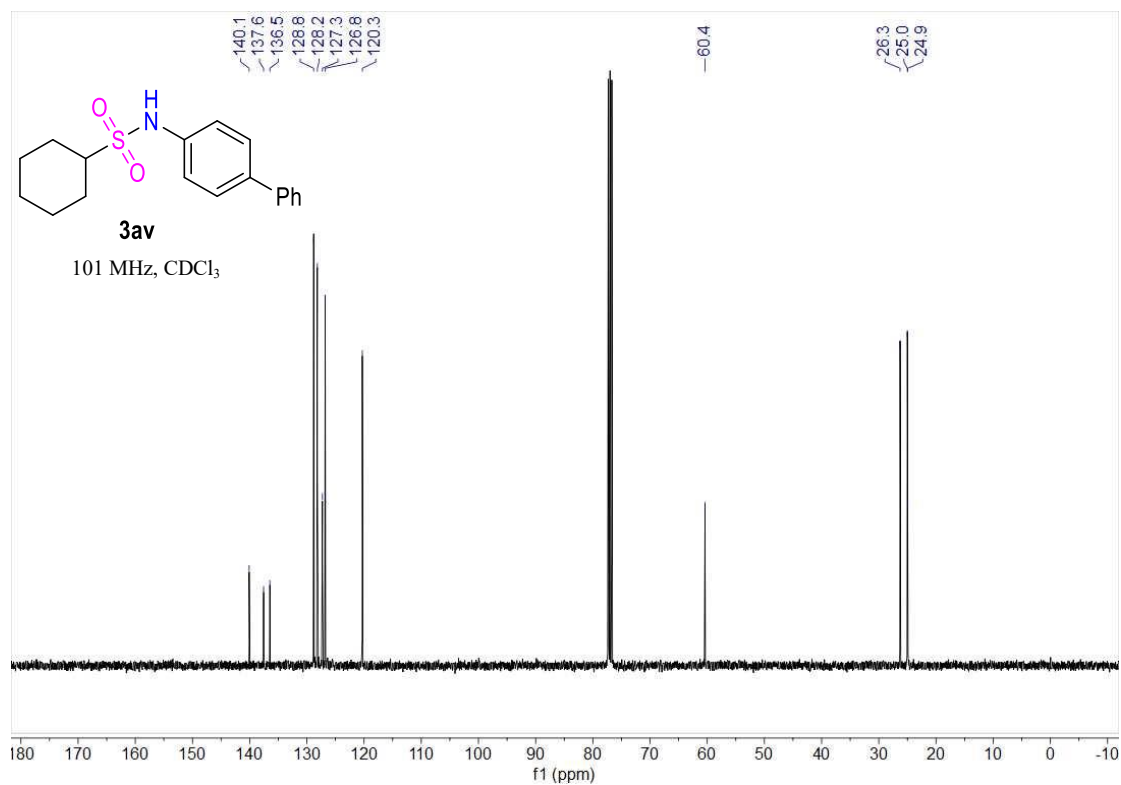

***N*-([1,1'-biphenyl]-4-yl)cyclopentanesulfonamide (3aw)**

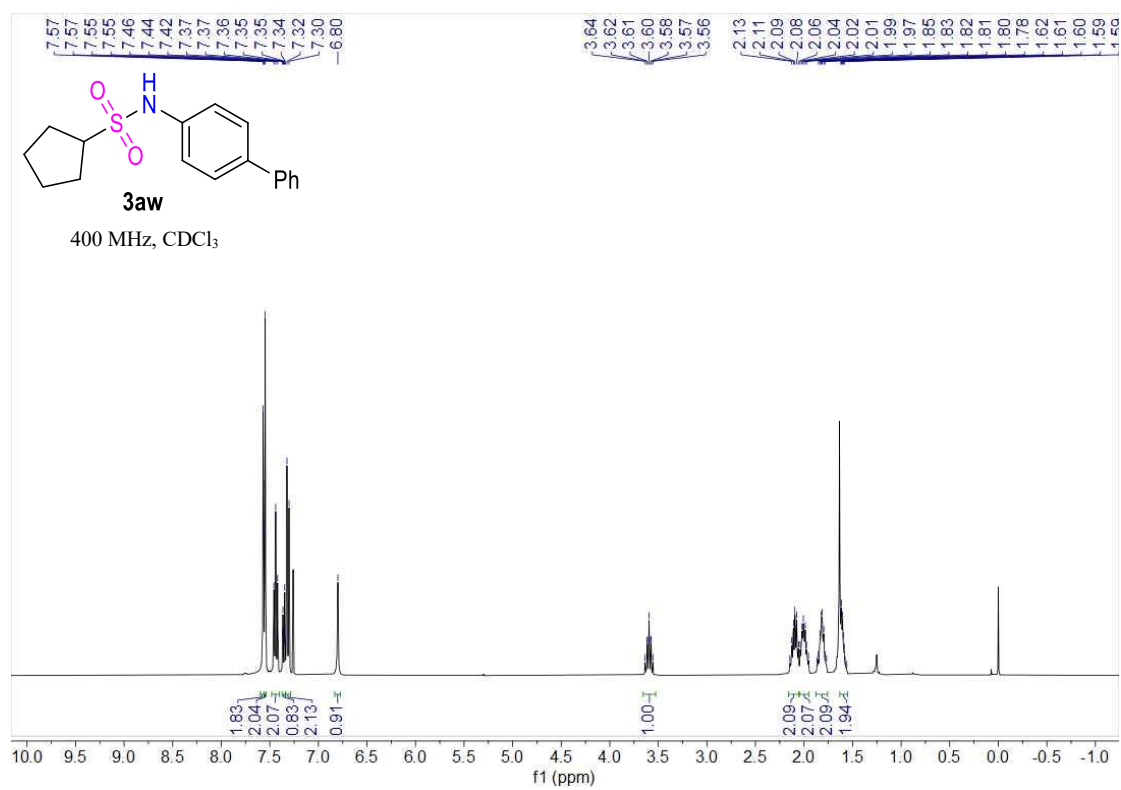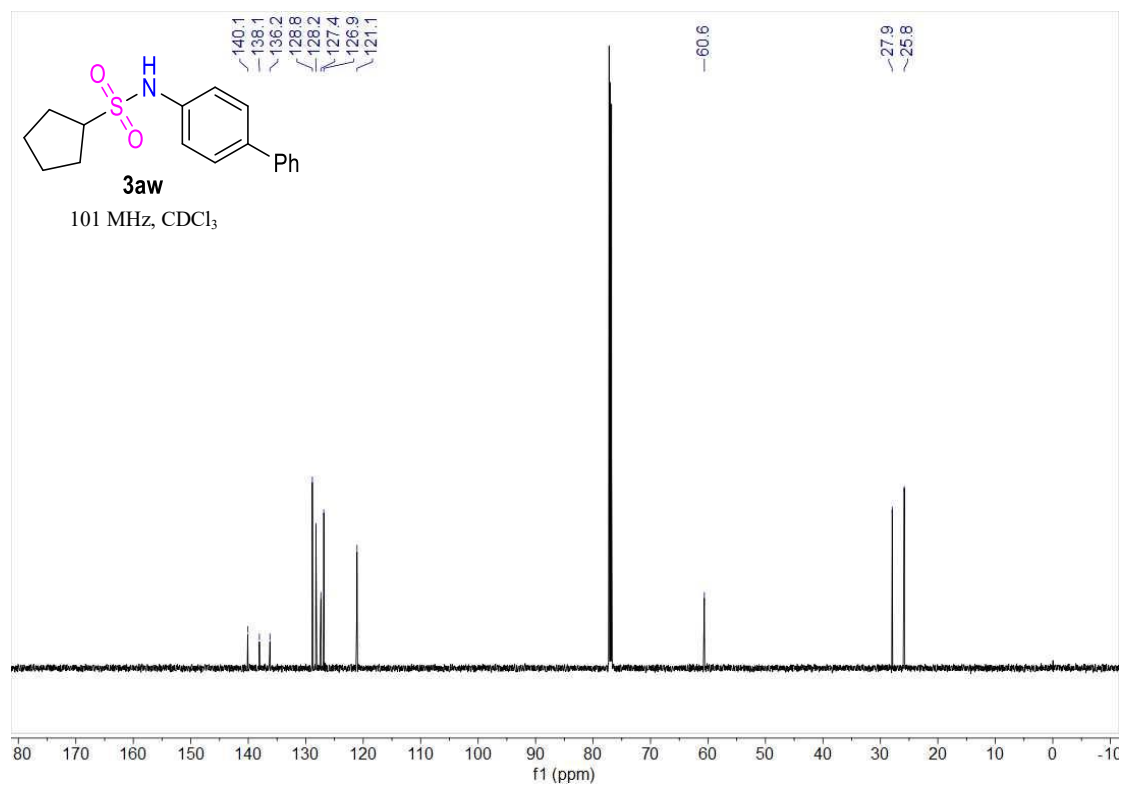

Supplement: Supplementary file 1 [file 38313117]
